# Supplementary material for: Cytotoxicity, anti-diabeticity, and phytocomposition investigation of Vietnamese Euphorbia tithymaloides Linn. (Euphorbiaceae)
Source: Royal Society of Chemistry journal article supplement (doi:10.1039/d3ra05637f), 2023-01-01
Supplement: d3ra05637f1.pdf [file d3ra05637f1.pdf]

## SUPPLEMENTARY INFORMATION

### **Cytotoxicity, Anti-diabeticity, and Phytochemical Investigation of Vietnamese *Euphorbia tithymaloides* Linn. (Euphorbiaceae)**

Nguyen Vu Duy Khang,<sup>a,b</sup> Dinh Thi Hong Dao,<sup>a,b</sup> Nguyen Thi Thanh Mai,<sup>a,b,c</sup> Tran Le Quan,<sup>a,b</sup> and Nguyen Thi Y Nhi<sup>\*a,b</sup>

<sup>a</sup> Faculty of Chemistry, University of Science – Ho Chi Minh City – Vietnam, 227 Nguyen Van Cu Street, Ward 4, District 5, 70000 Ho Chi Minh City, Vietnam.

<sup>b</sup> Vietnam National University, Ho Chi Minh City, Vo Truong Toan Street, Linh Trung District, Thu Duc City, 70000 Ho Chi Minh City, Vietnam.

<sup>c</sup> Research Lab for Drug Discovery and Development, University of Science – Ho Chi Minh City – Vietnam, 227 Nguyen Van Cu Street, Ward 4, District 5, 70000 Ho Chi Minh City, Vietnam.

\* Corresponding author

Nguyen Thi Y Nhi, Faculty of Chemistry, University of Science – Ho Chi Minh City – Vietnam, 227 Nguyen Van Cu Street, Ward 4, District 5, 70000 Ho Chi Minh City, Vietnam

Tel.: +84 902 41 2668

E-mail address: ntynhi@hcmus.edu.vn

#### **TABLE OF CONTENTS:**

|                                                                                                                                                                                                          |         |
|----------------------------------------------------------------------------------------------------------------------------------------------------------------------------------------------------------|---------|
| <b>Figure S1–S8.</b> <sup>1</sup> H-NMR, <sup>13</sup> C-NMR, COSY, HSQC, HMBC (total & sketched), NOESY, and MS spectra of compound <b>P1</b> (in Acetone- <i>d</i> <sub>6</sub> )                      | S2–S9   |
| <b>Figure S9–S19.</b> <sup>1</sup> H-NMR, <sup>13</sup> C-NMR (total & sketched), COSY, HSQC, HMBC, NOESY, MS spectra (in CDCl <sub>3</sub> ), and structural novelty check for compound <b>P2</b>       | S10–S20 |
| <b>Figure S20–S33.</b> <sup>1</sup> H-NMR, <sup>13</sup> C-NMR (total & sketched), COSY, HSQC, HMBC, NOESY (total & sketched), and MS spectra of compound <b>P3</b> (in Acetone- <i>d</i> <sub>6</sub> ) | S21–S34 |
| <b>Figure S34–S41.</b> <sup>1</sup> H-NMR, <sup>13</sup> C-NMR, COSY, HSQC, HMBC (total & sketched), NOESY, MS spectra (in CDCl <sub>3</sub> ), and structural novelty check for compound <b>P4</b>      | S35–S42 |
| <b>Figure S42–S51.</b> <sup>1</sup> H-NMR, <sup>13</sup> C-NMR, COSY, HSQC, HMBC (total & sketched), NOESY, MS spectra (in CDCl <sub>3</sub> ), and structural novelty check for compound <b>P5</b>      | S43–S52 |

Figure S1.  $^1\text{H-NMR}$  (600 MHz, Acetone- $d_6$ ) spectrum of compound P1

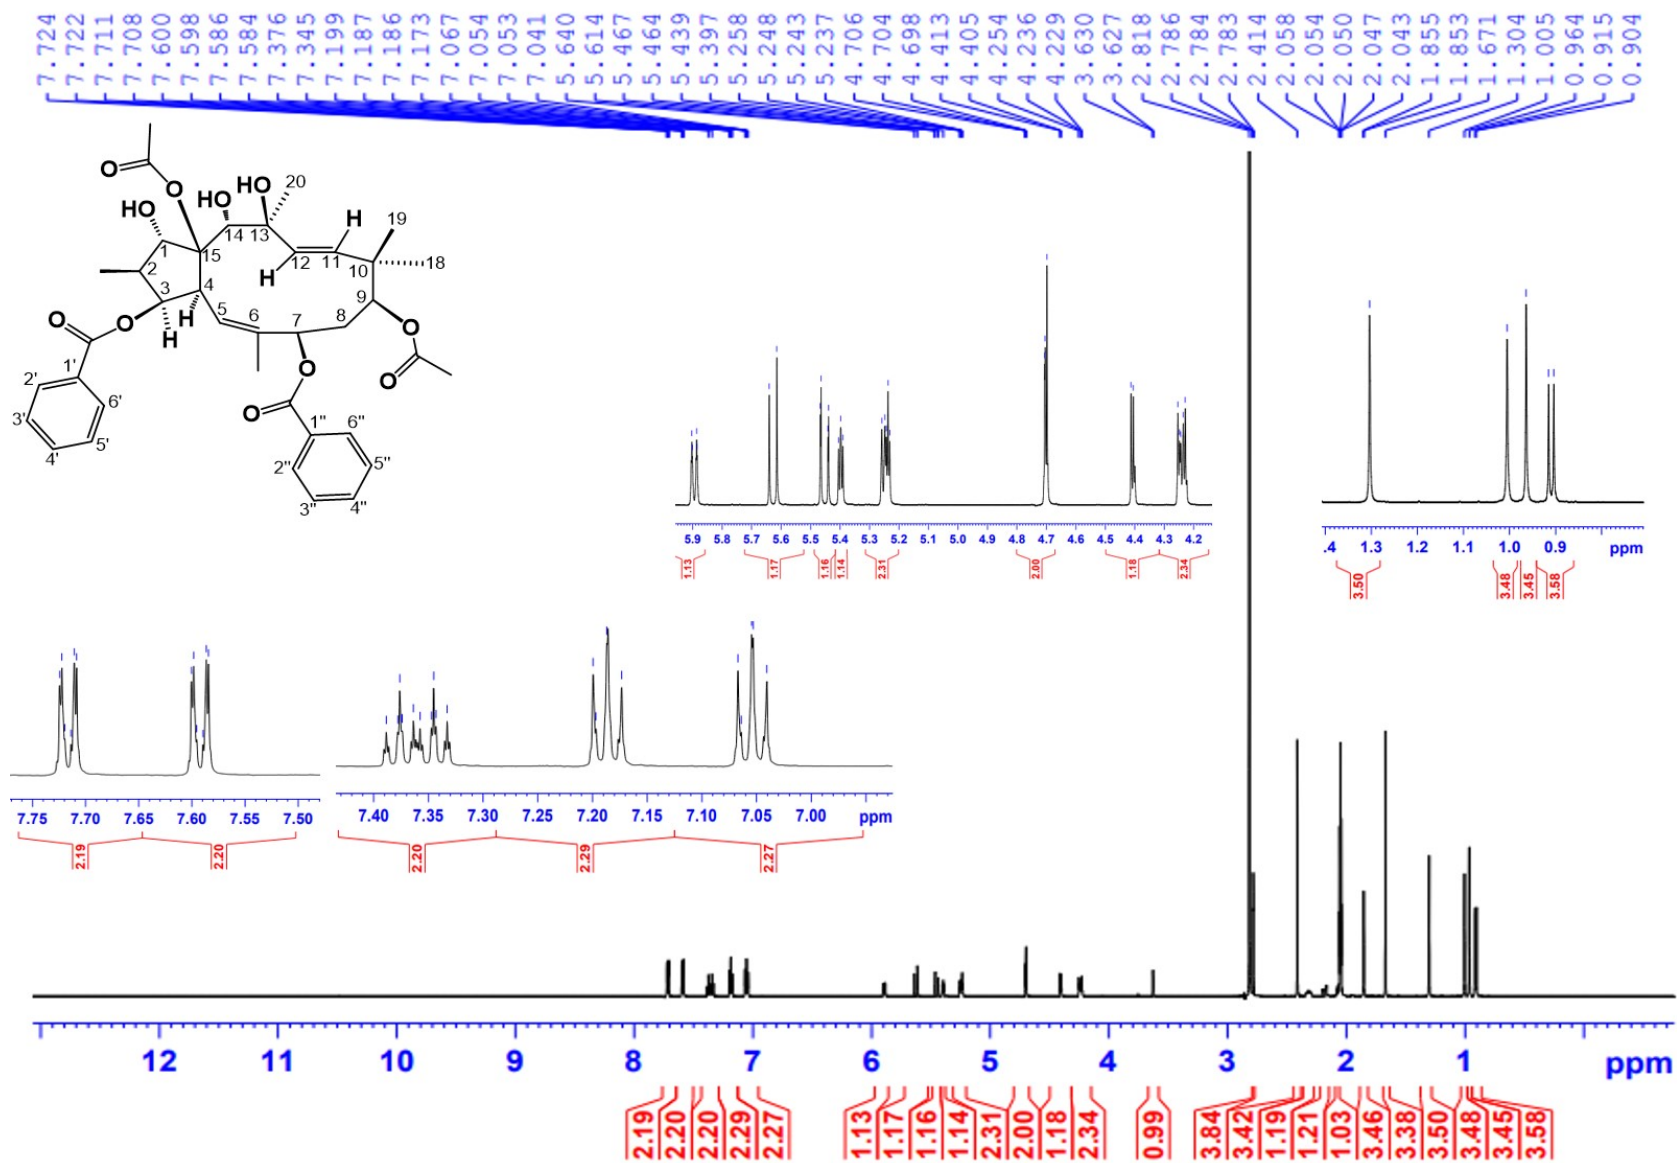

Figure S2.  $^{13}\text{C}$ -NMR (125 MHz, Acetone- $d_6$ ) spectrum of compound P1

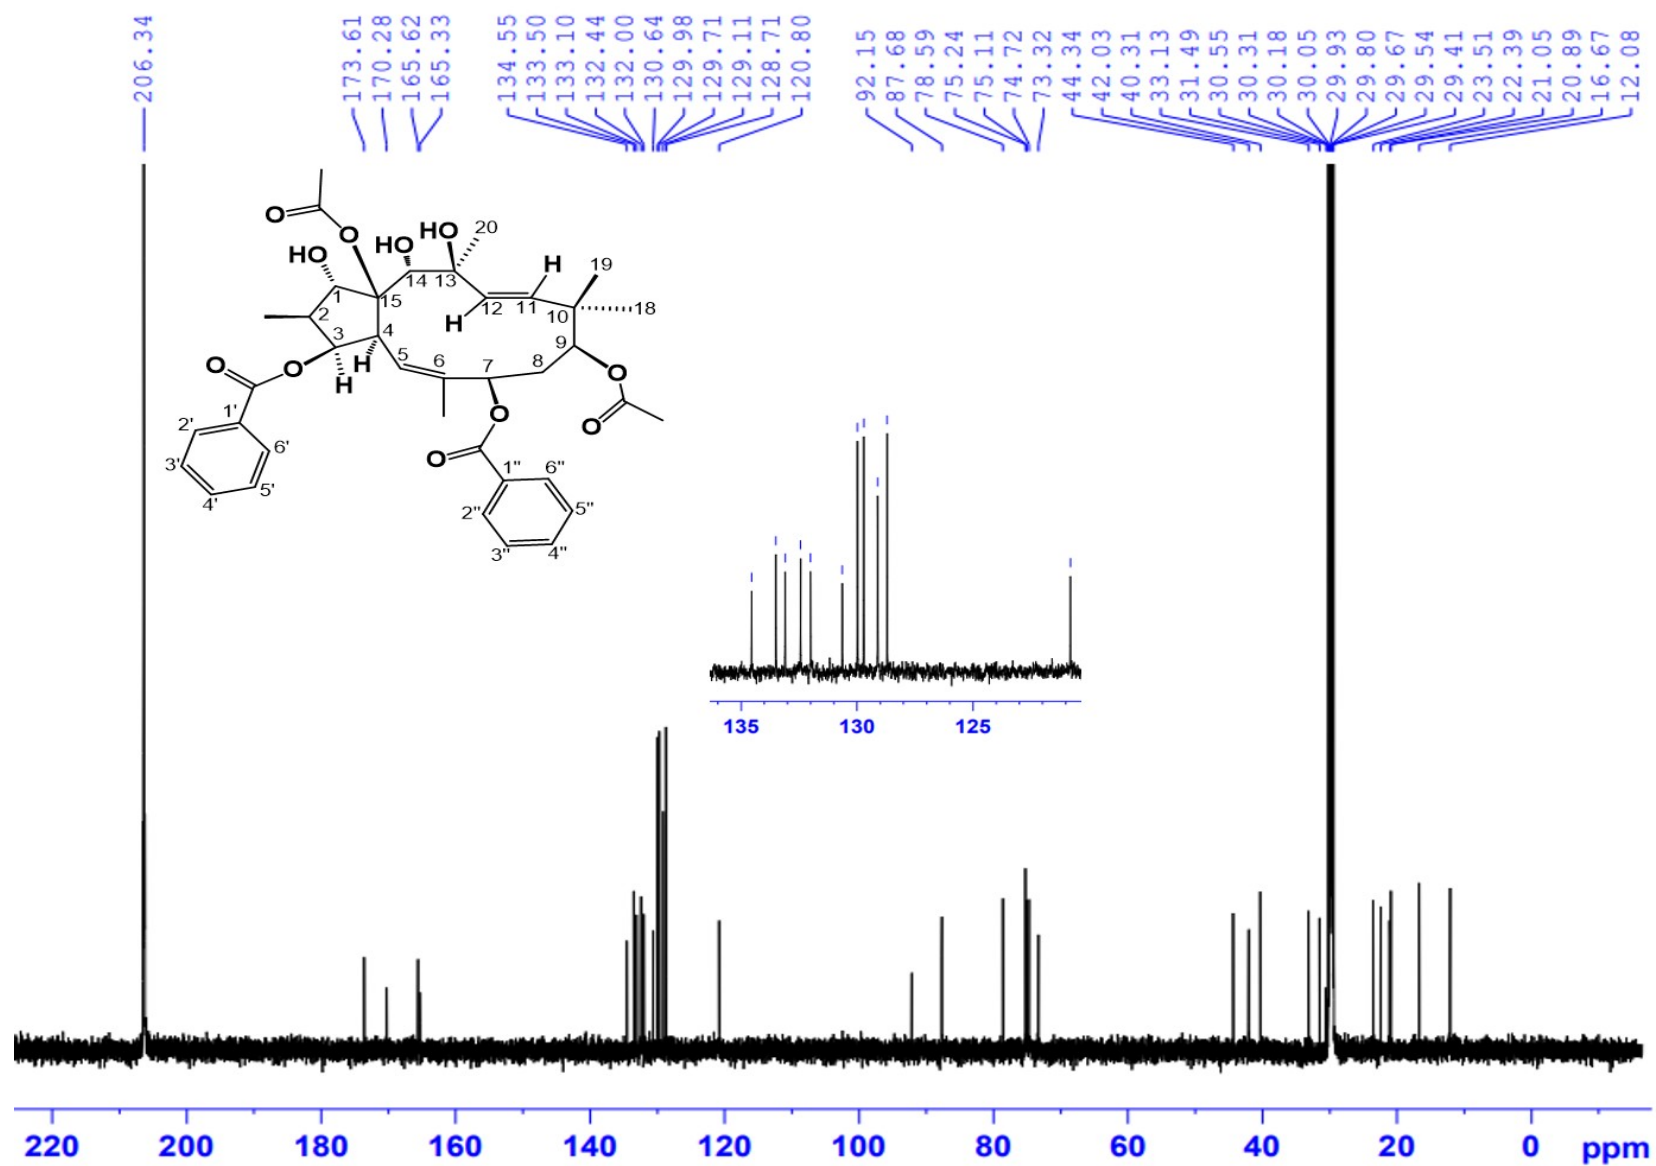

Figure S3. COSY (Acetone- $d_6$ ) spectrum of compound P1

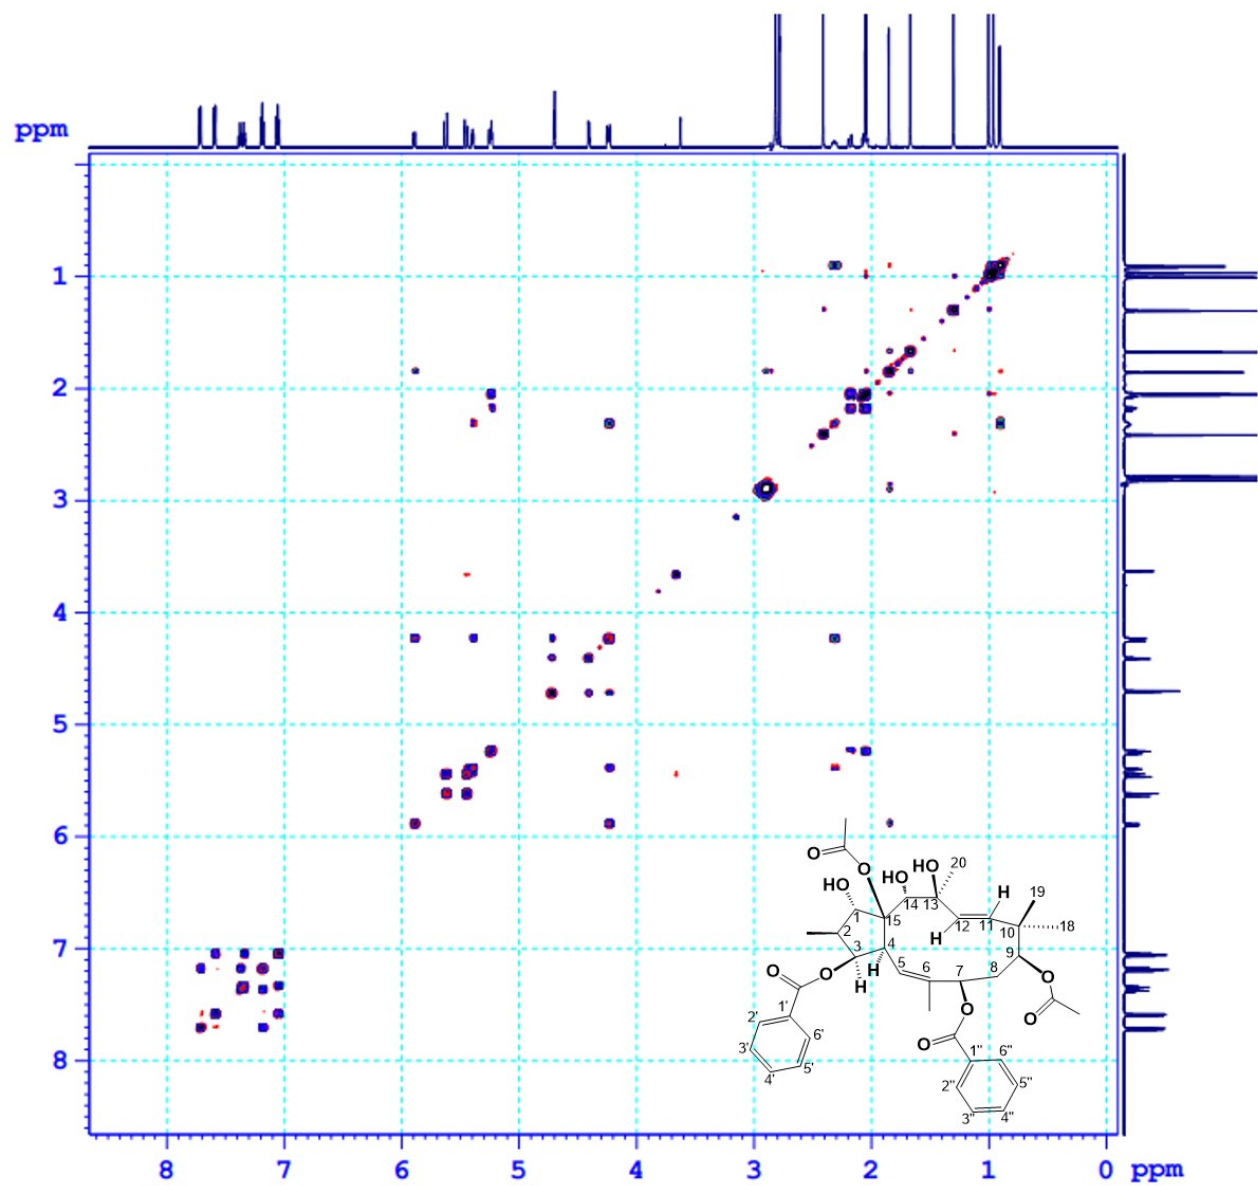

Figure S4. HSQC (Acetone- $d_6$ ) spectrum of compound P1

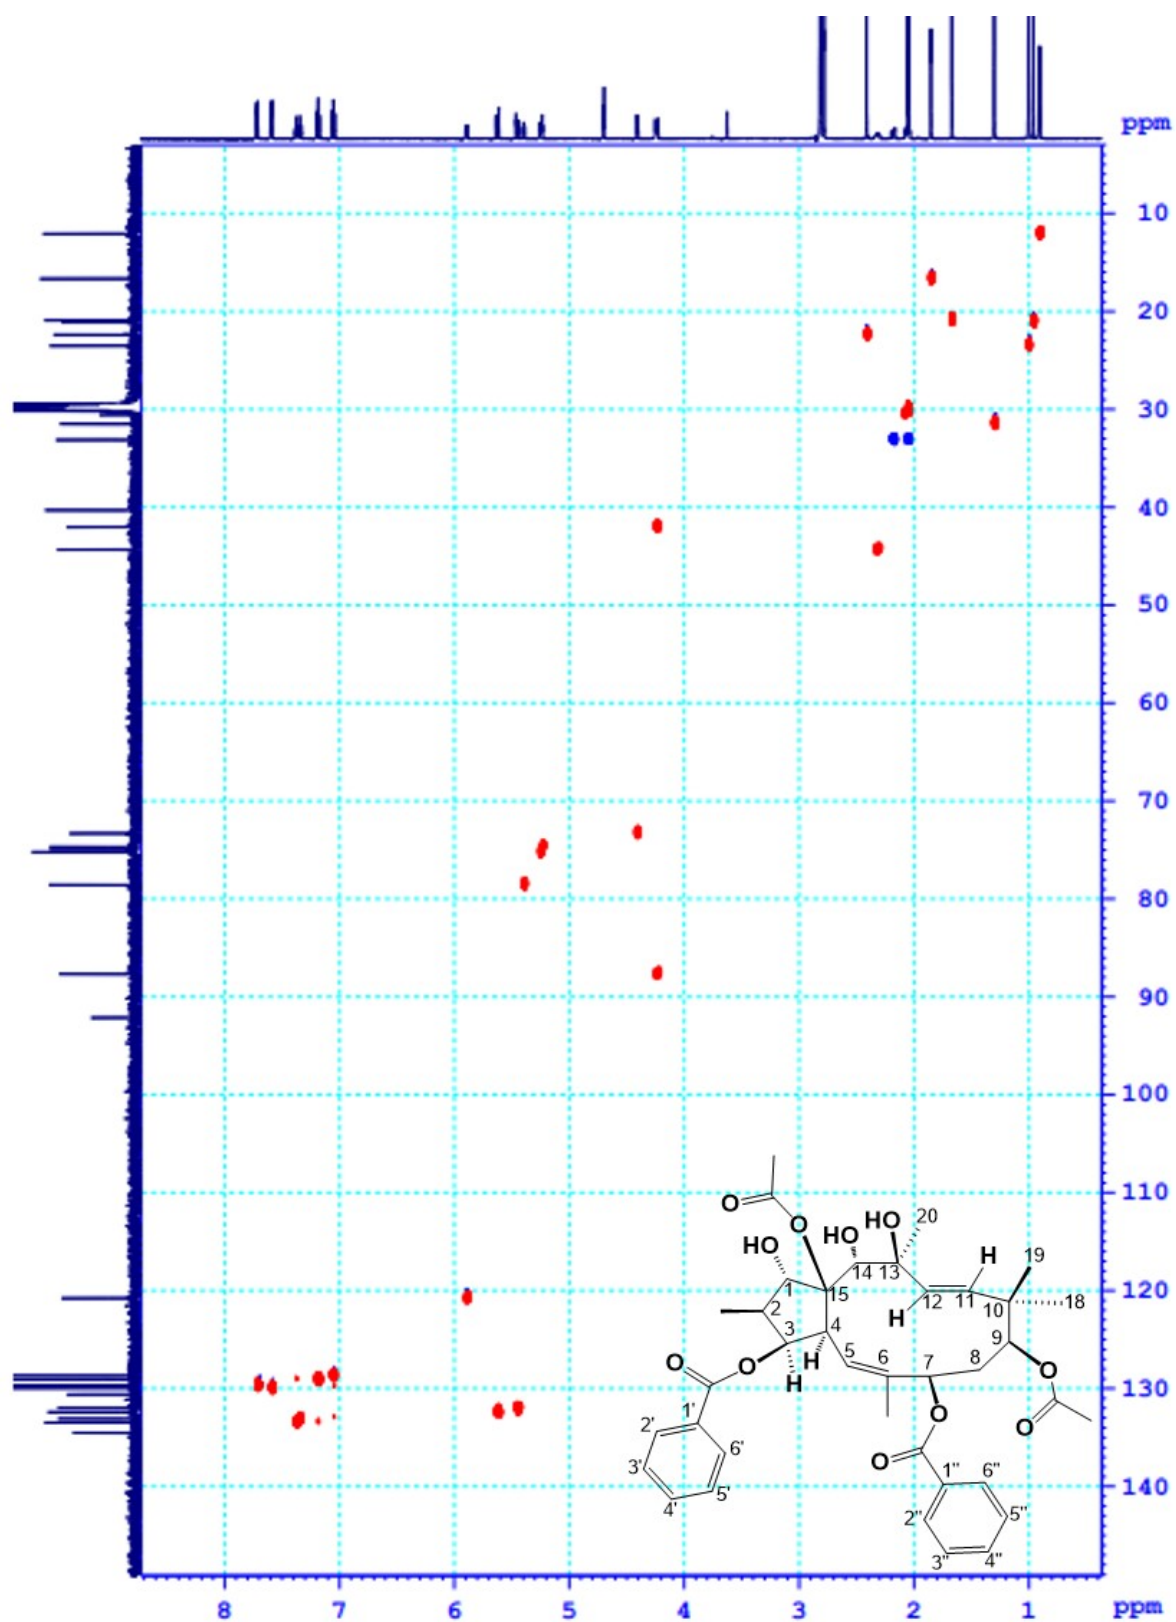

Figure S5. HMBC (Acetone- $d_6$ ) spectrum (total) of compound P1

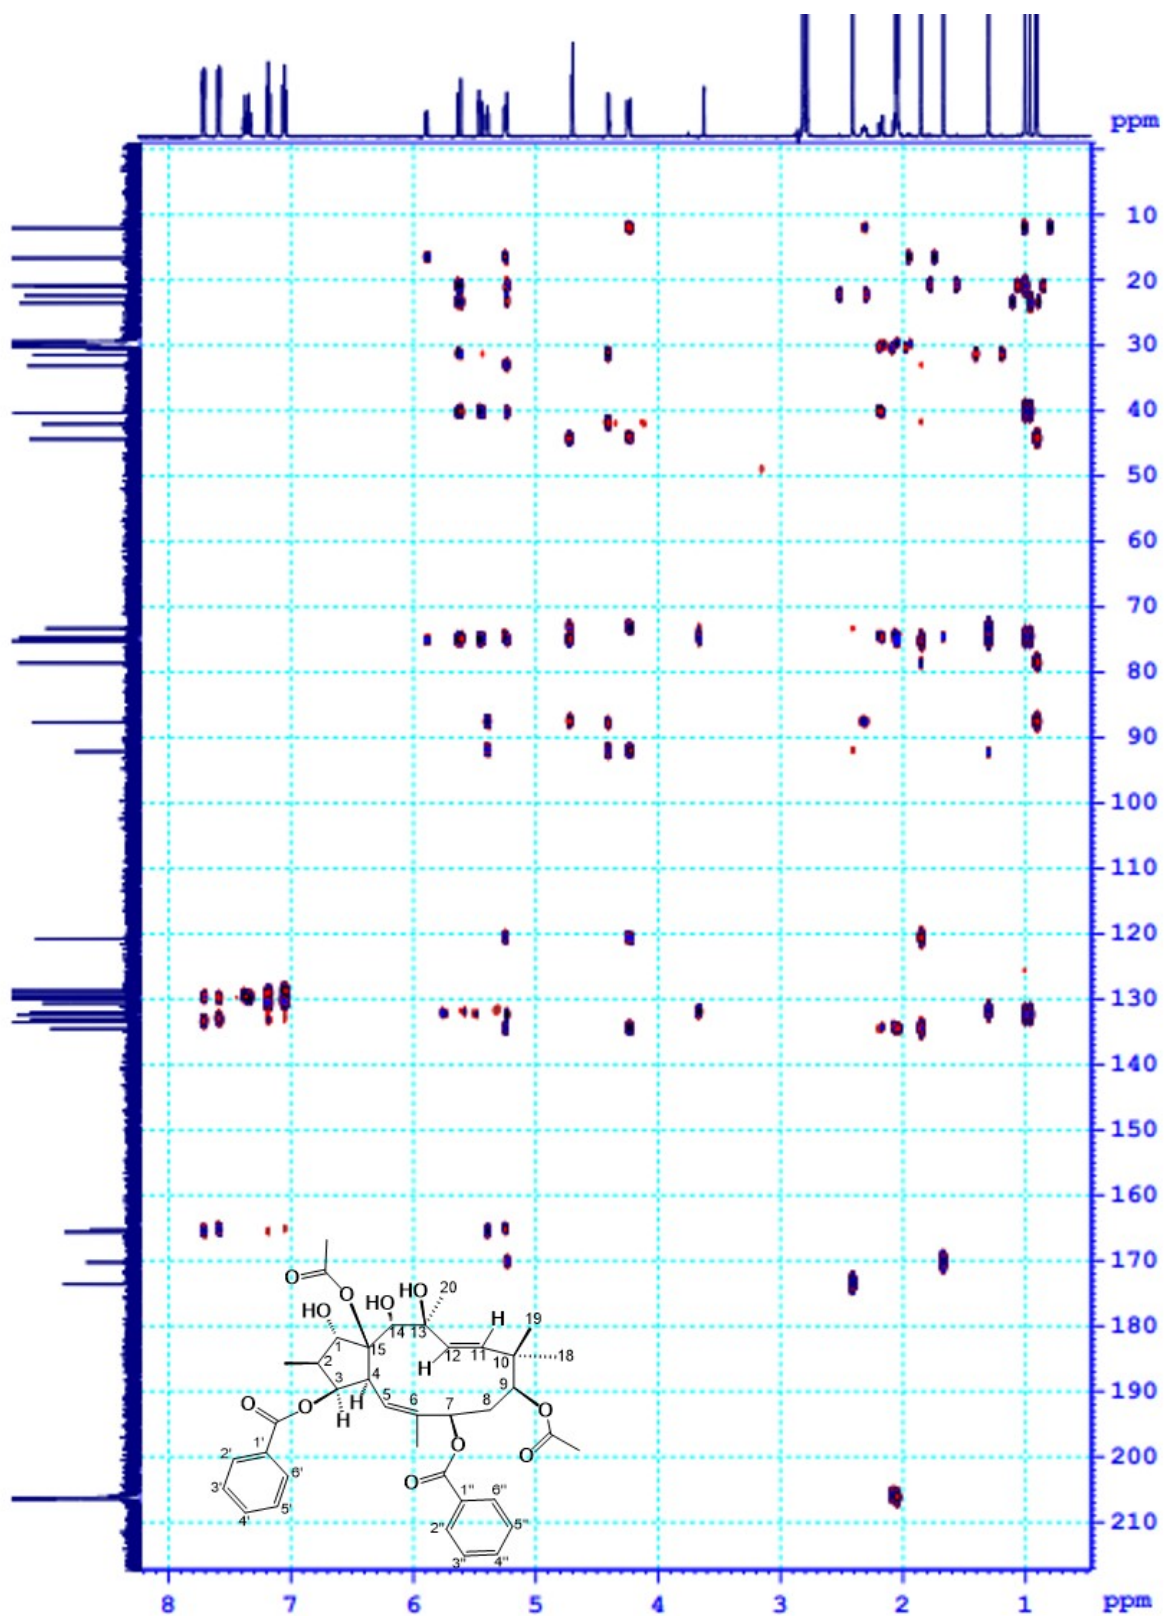

Figure S6. HMBC (Acetone- $d_6$ ) spectrum (sketched) of compound **P1**

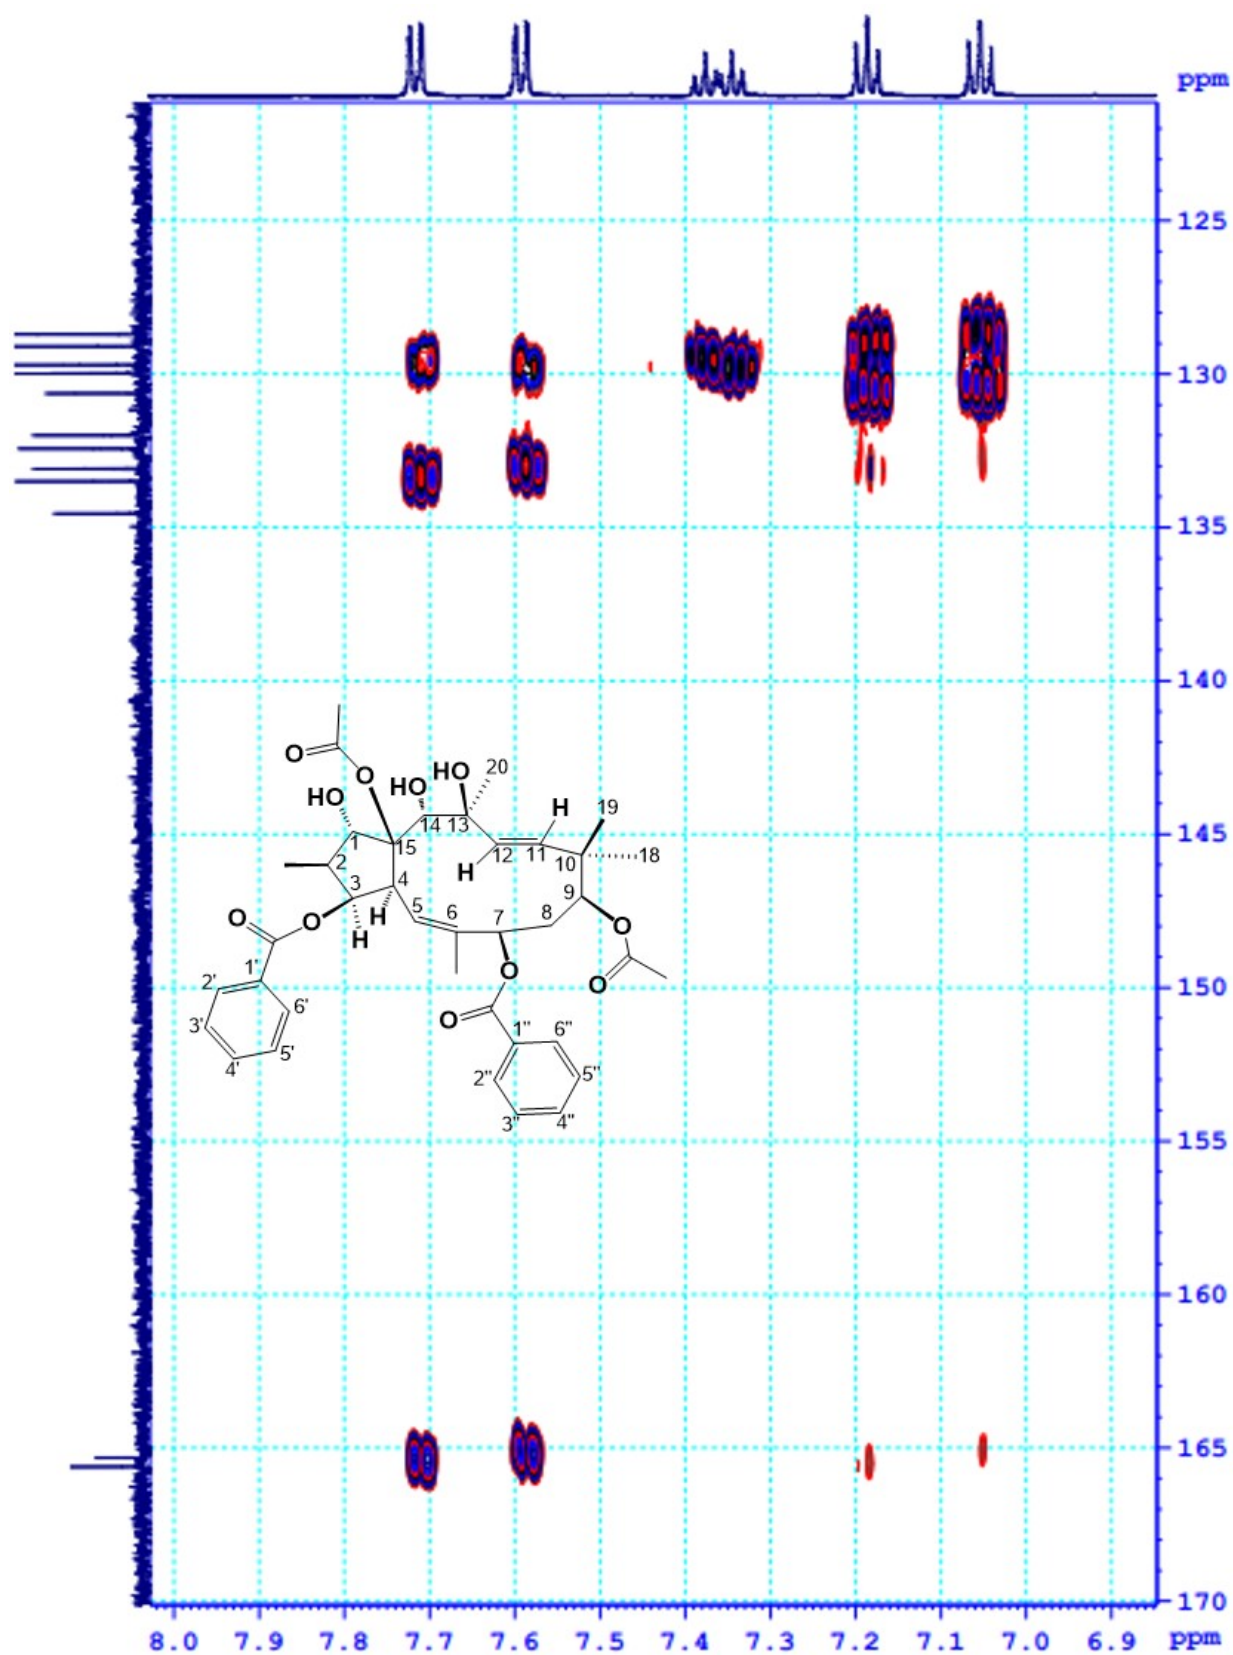

Figure S7. NOESY (Acetone- $d_6$ ) spectrum of compound P1

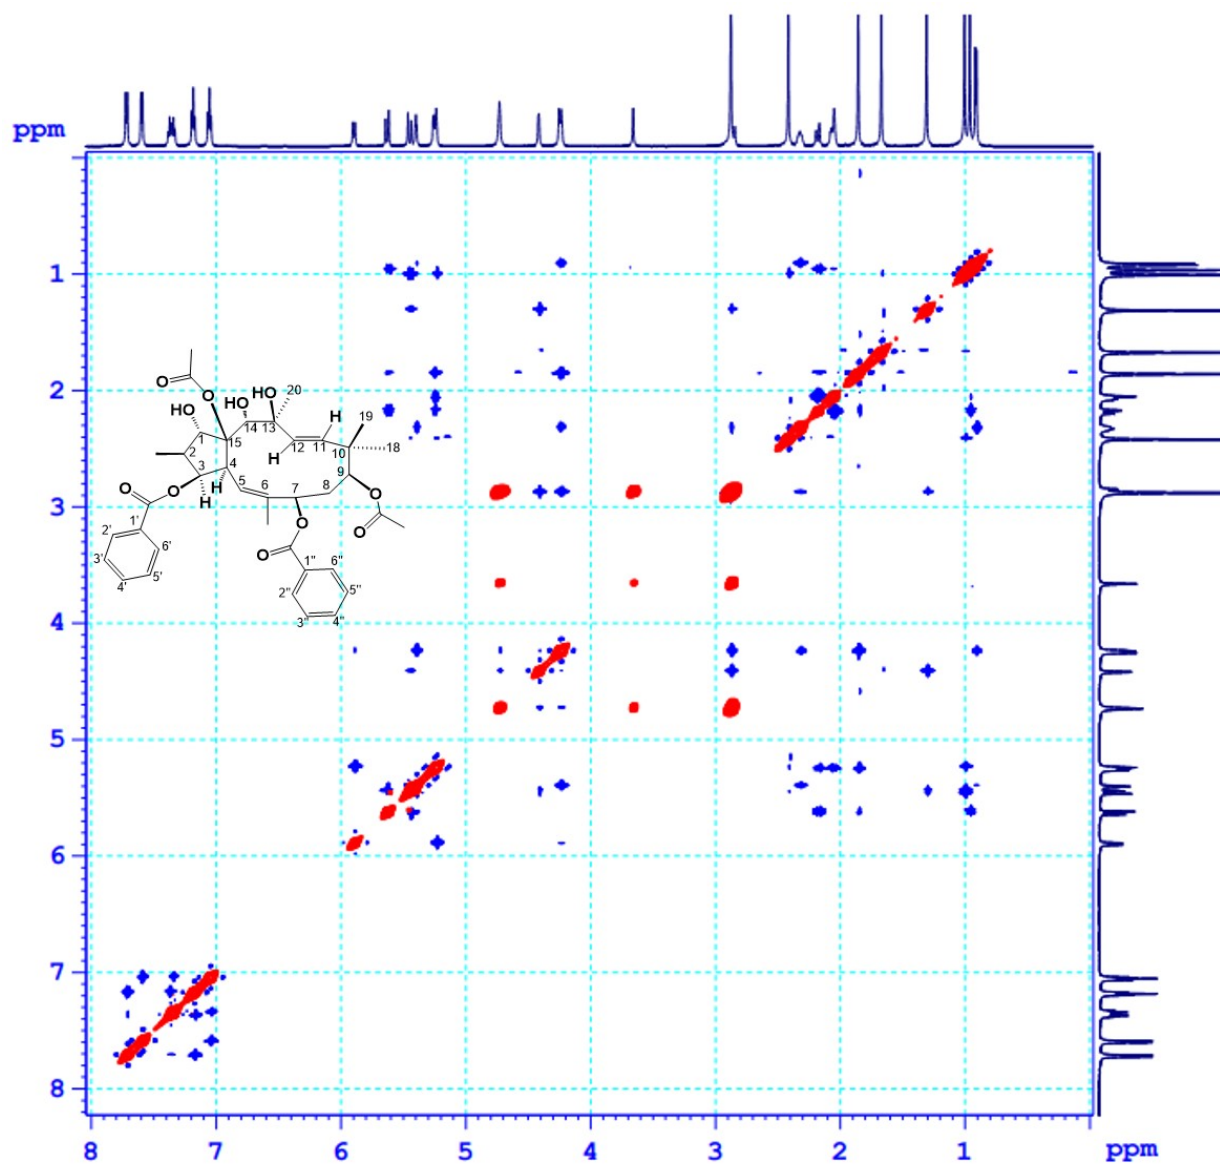



Figure S8. MS spectrum of compound P1 (Acetone- $d_6$ )

|             |                        |                        |         |                 |                       |
|-------------|------------------------|------------------------|---------|-----------------|-----------------------|
| Sample Name | P1                     | Position               | P1-B4   | Instrument Name | Instrument 1          |
| User Name   |                        | Inj Vol                | 2       | InjPosition     |                       |
| Sample Type | Sample                 | IRM Calibration Status | Success | Data Filename   | AS1.d                 |
| ACQ Method  | Cot ngan - MSMS_Pos1.m | Comment                |         | Acquired Time   | 21/07/2022 1:12:50 PM |

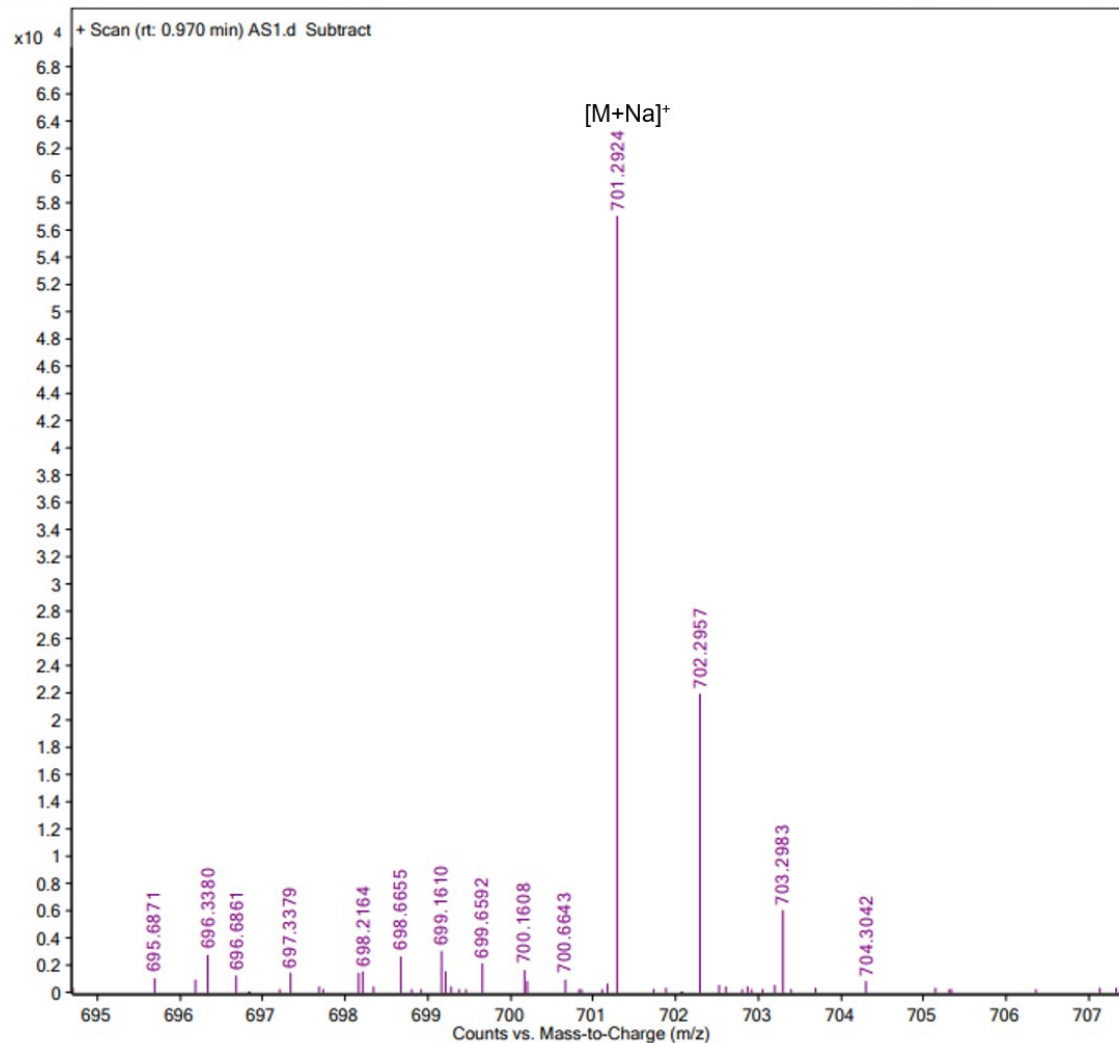

Figure S9. <sup>1</sup>H-NMR (600 MHz, CDCl<sub>3</sub>) spectrum (total) of compound P2

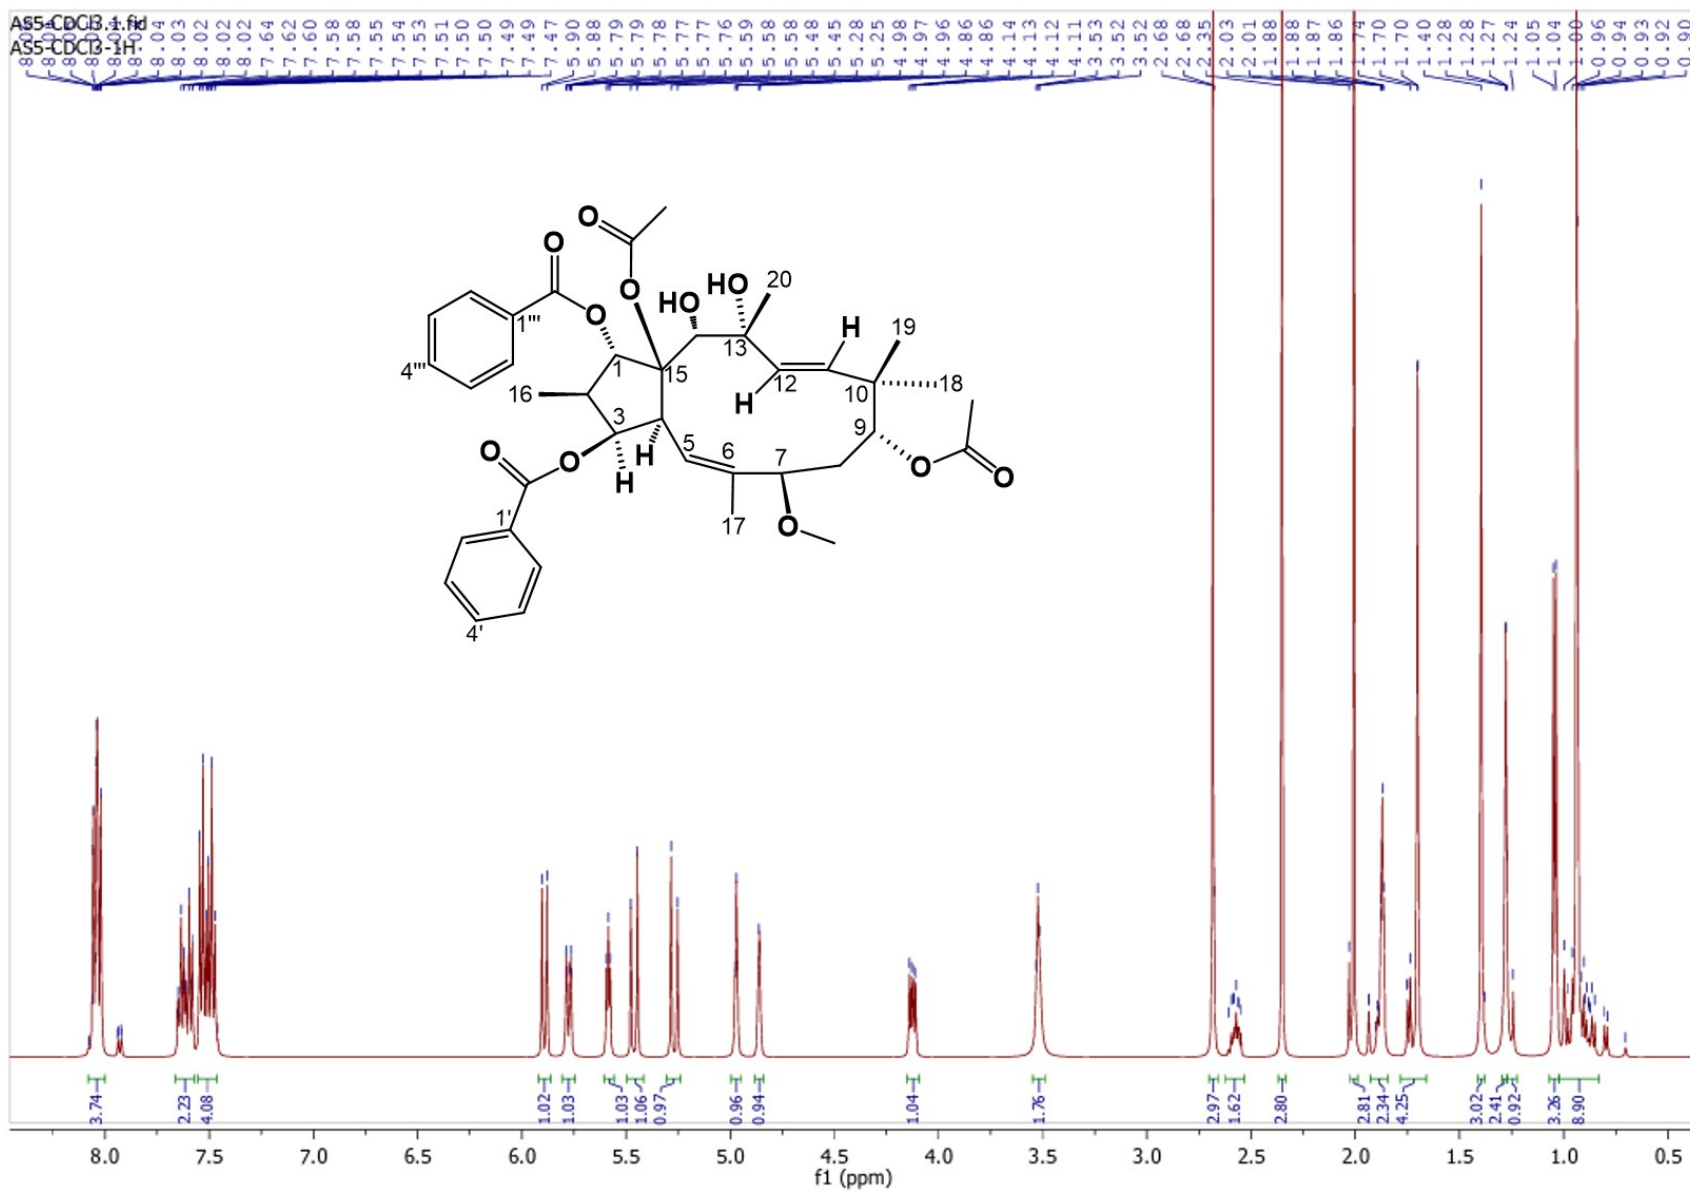

Figure S10.  $^1\text{H-NMR}$  (600 MHz,  $\text{CDCl}_3$ ) spectrum (sketched) of compound P2

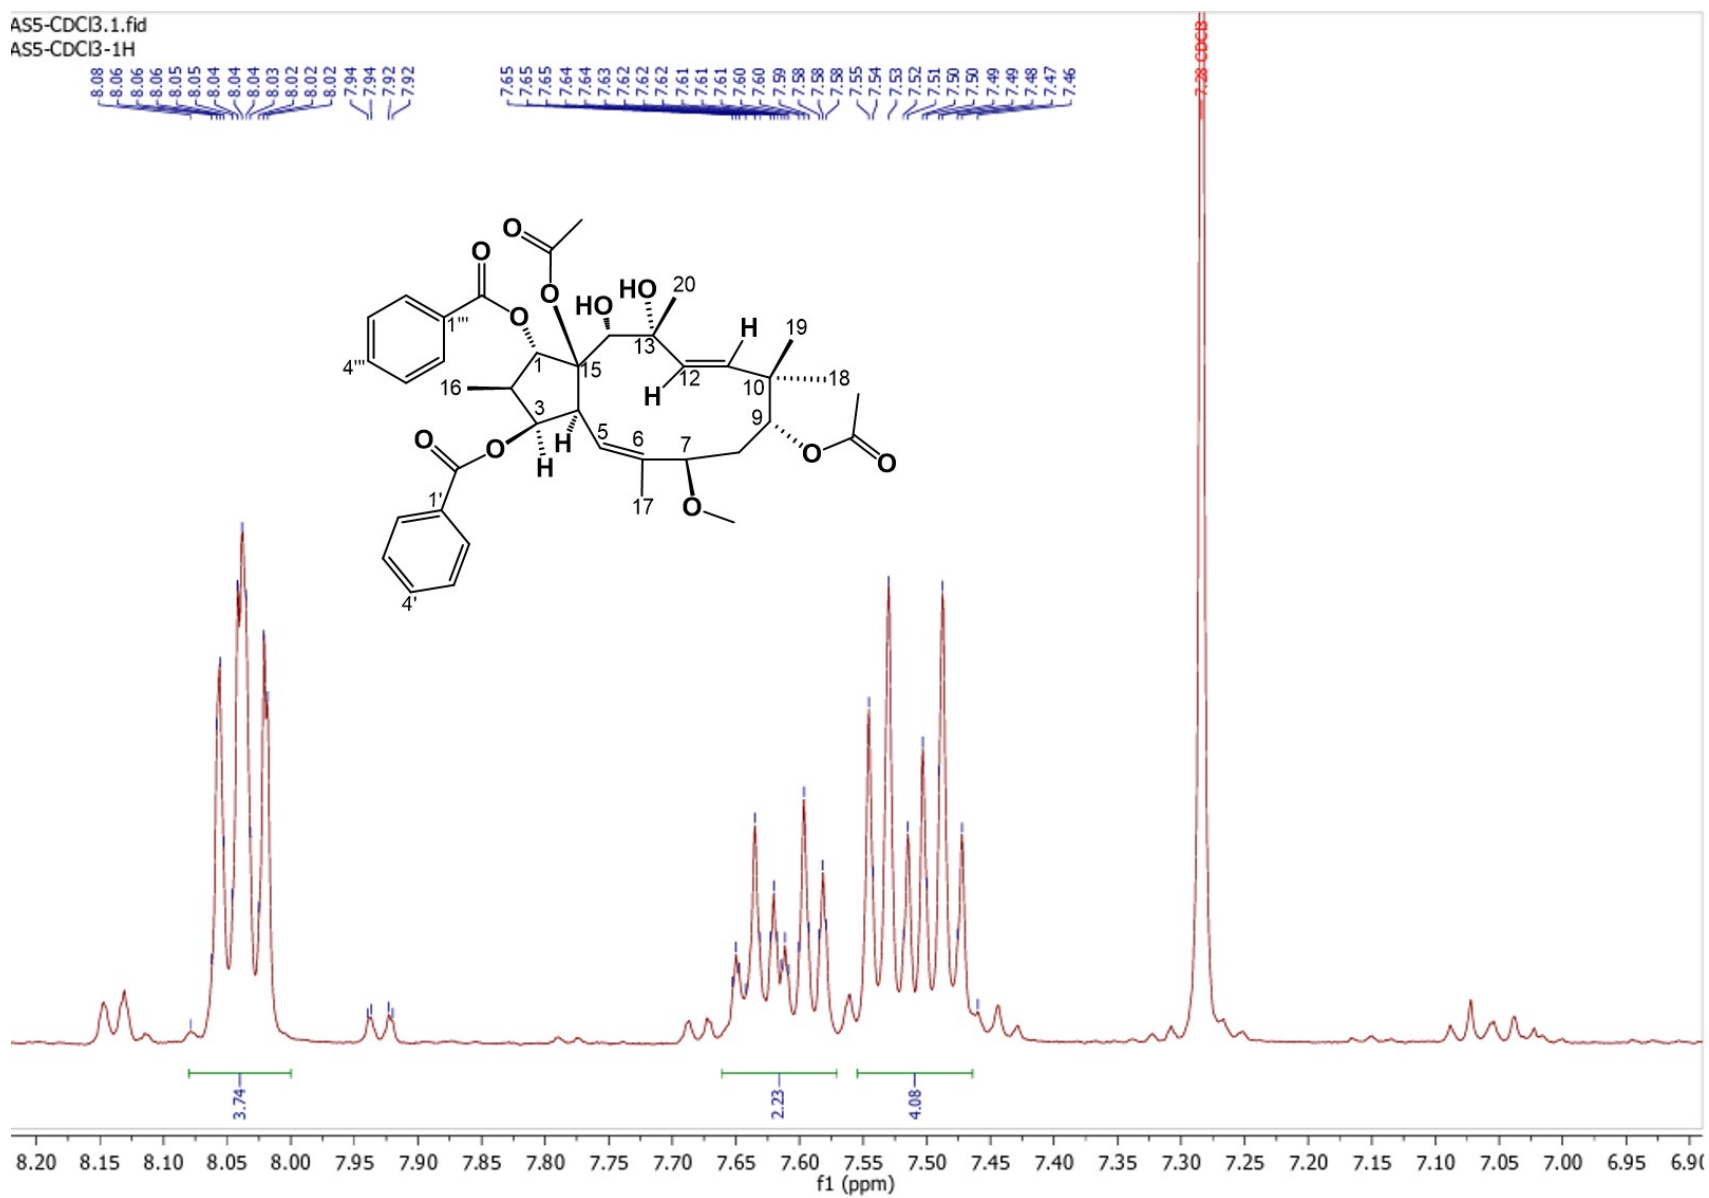

Figure S11. <sup>1</sup>H-NMR (600 MHz, CDCl<sub>3</sub>) spectrum (sketched) of compound P2

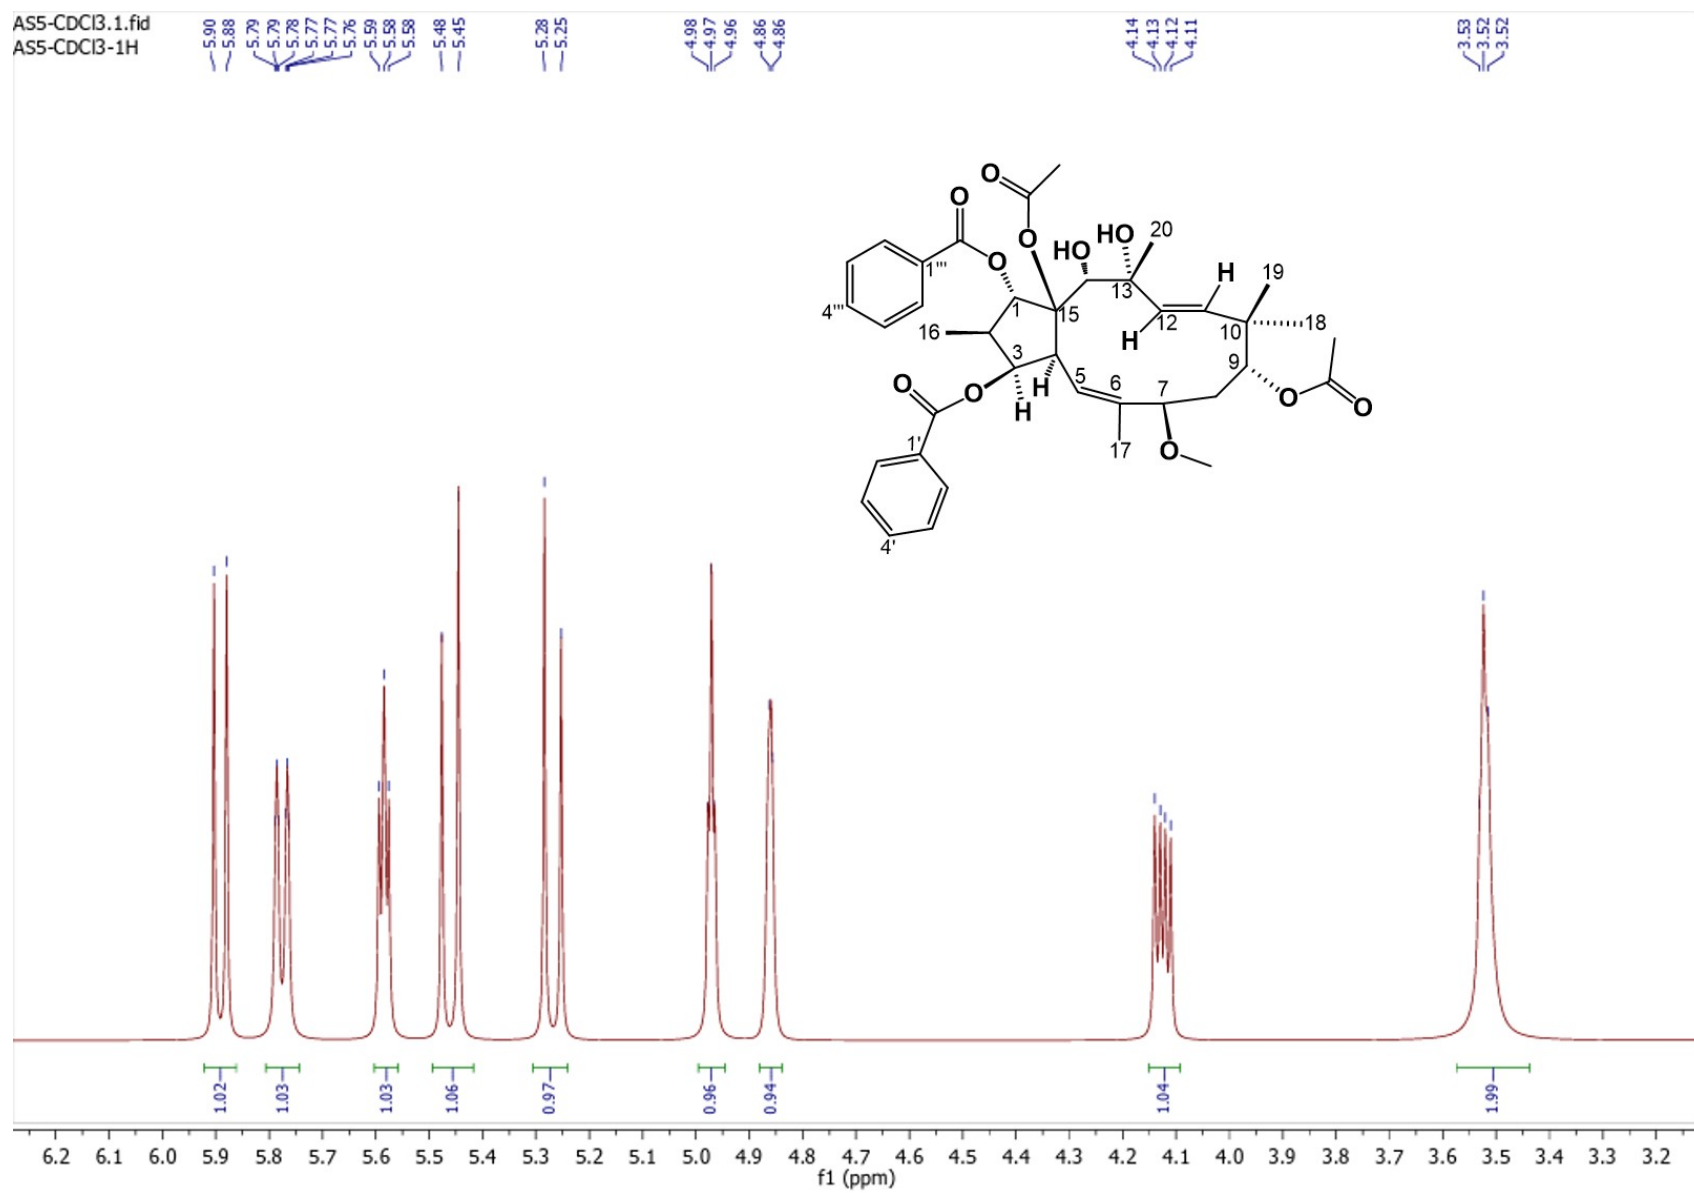

Figure S12. <sup>1</sup>H-NMR (600 MHz, CDCl<sub>3</sub>) spectrum (sketched) of compound P2

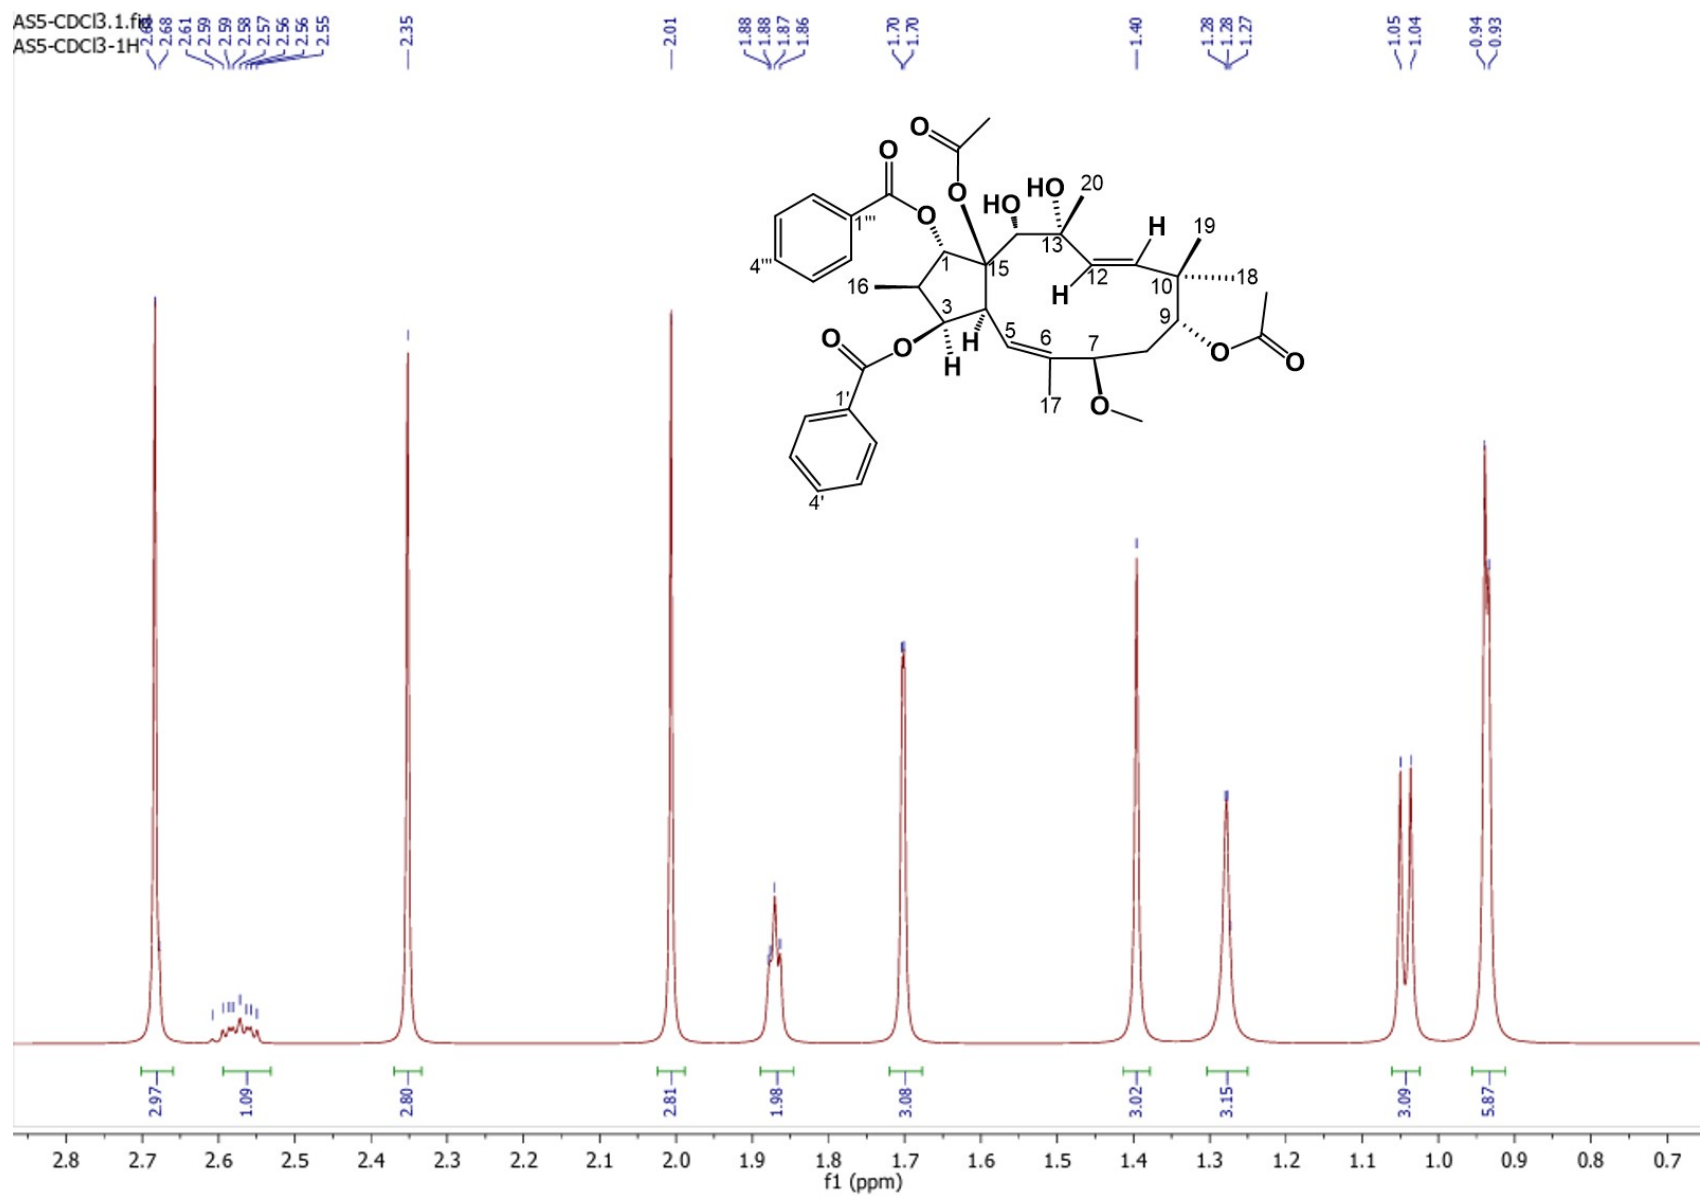

Figure S13.  $^{13}\text{C}$ -NMR (125 MHz,  $\text{CDCl}_3$ ) spectrum of compound P2

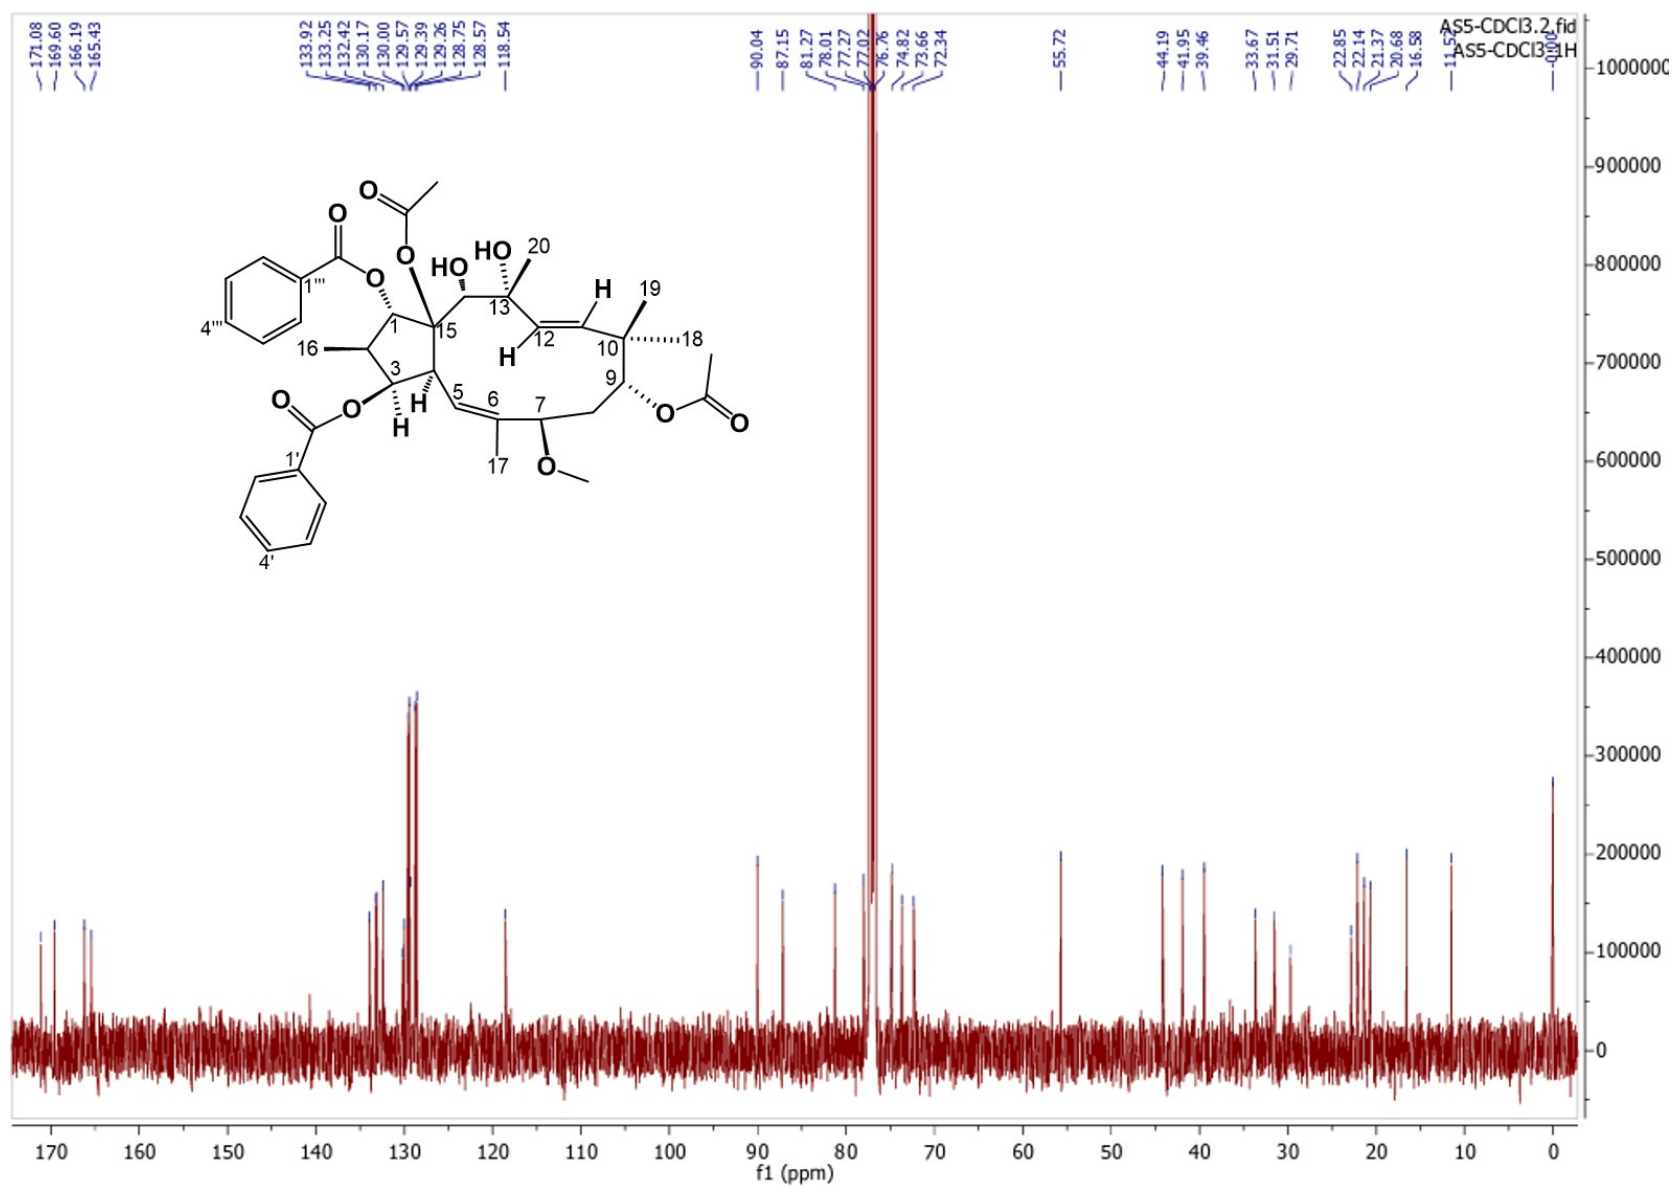

Figure S14. COSY (CDCl<sub>3</sub>) spectrum of compound P2

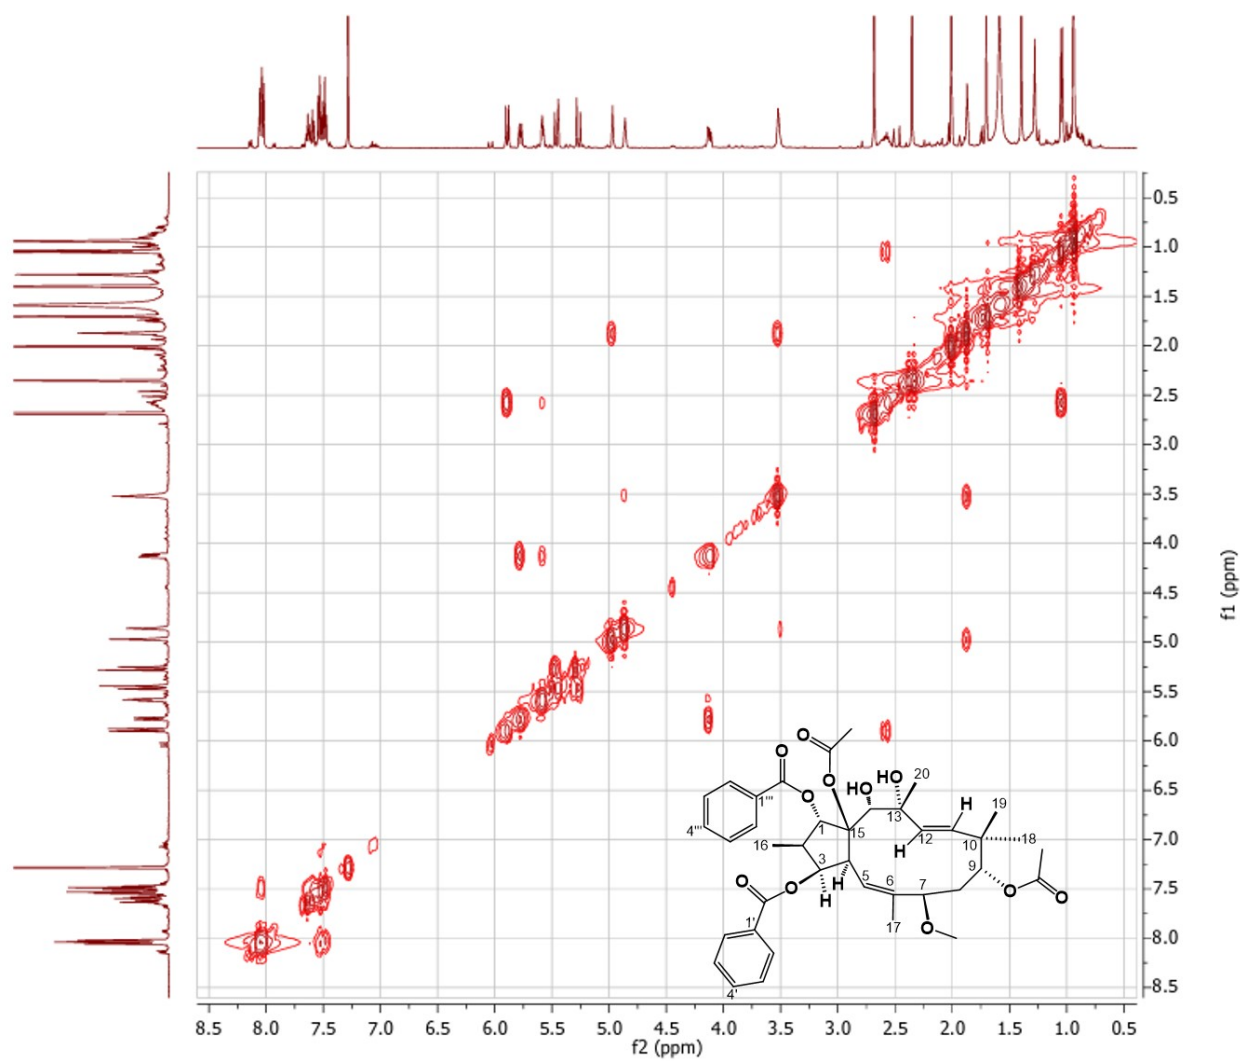

Figure S15. HSQC (CDCl<sub>3</sub>) spectrum of compound P2

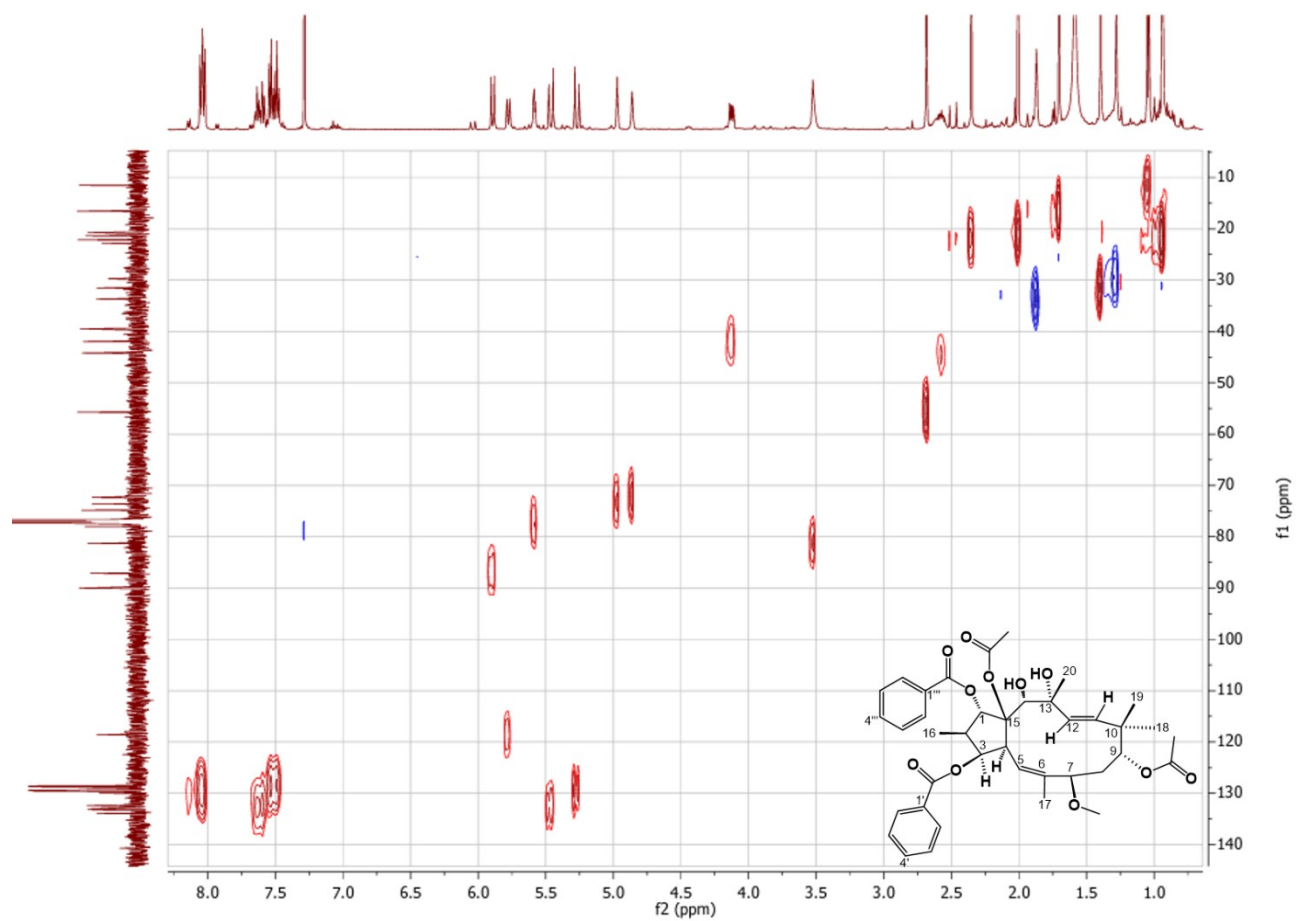



Figure S16. HMBC (CDCl<sub>3</sub>) spectrum of compound P2

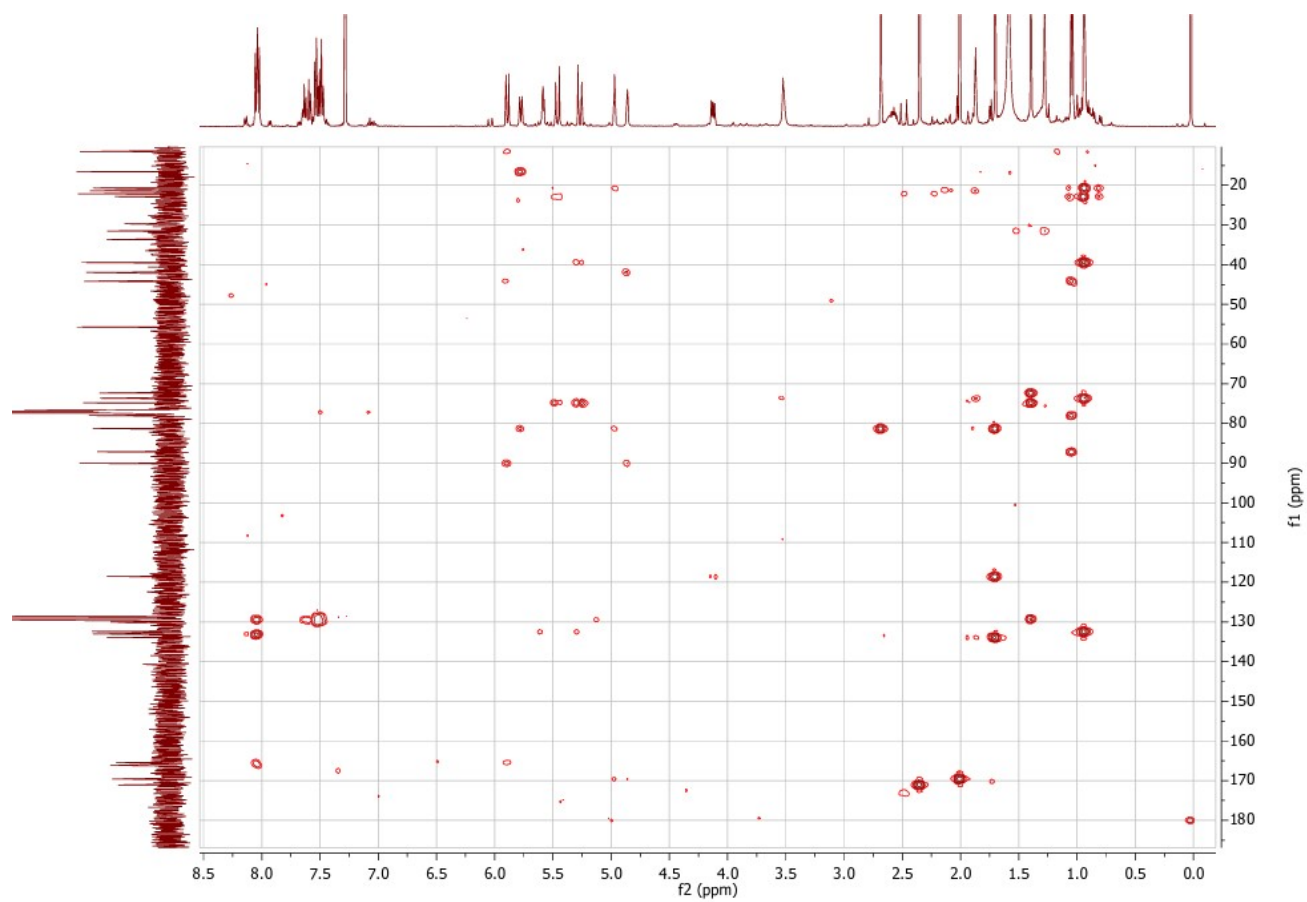

Figure S17. NOESY (CDCl<sub>3</sub>) spectrum of compound P2

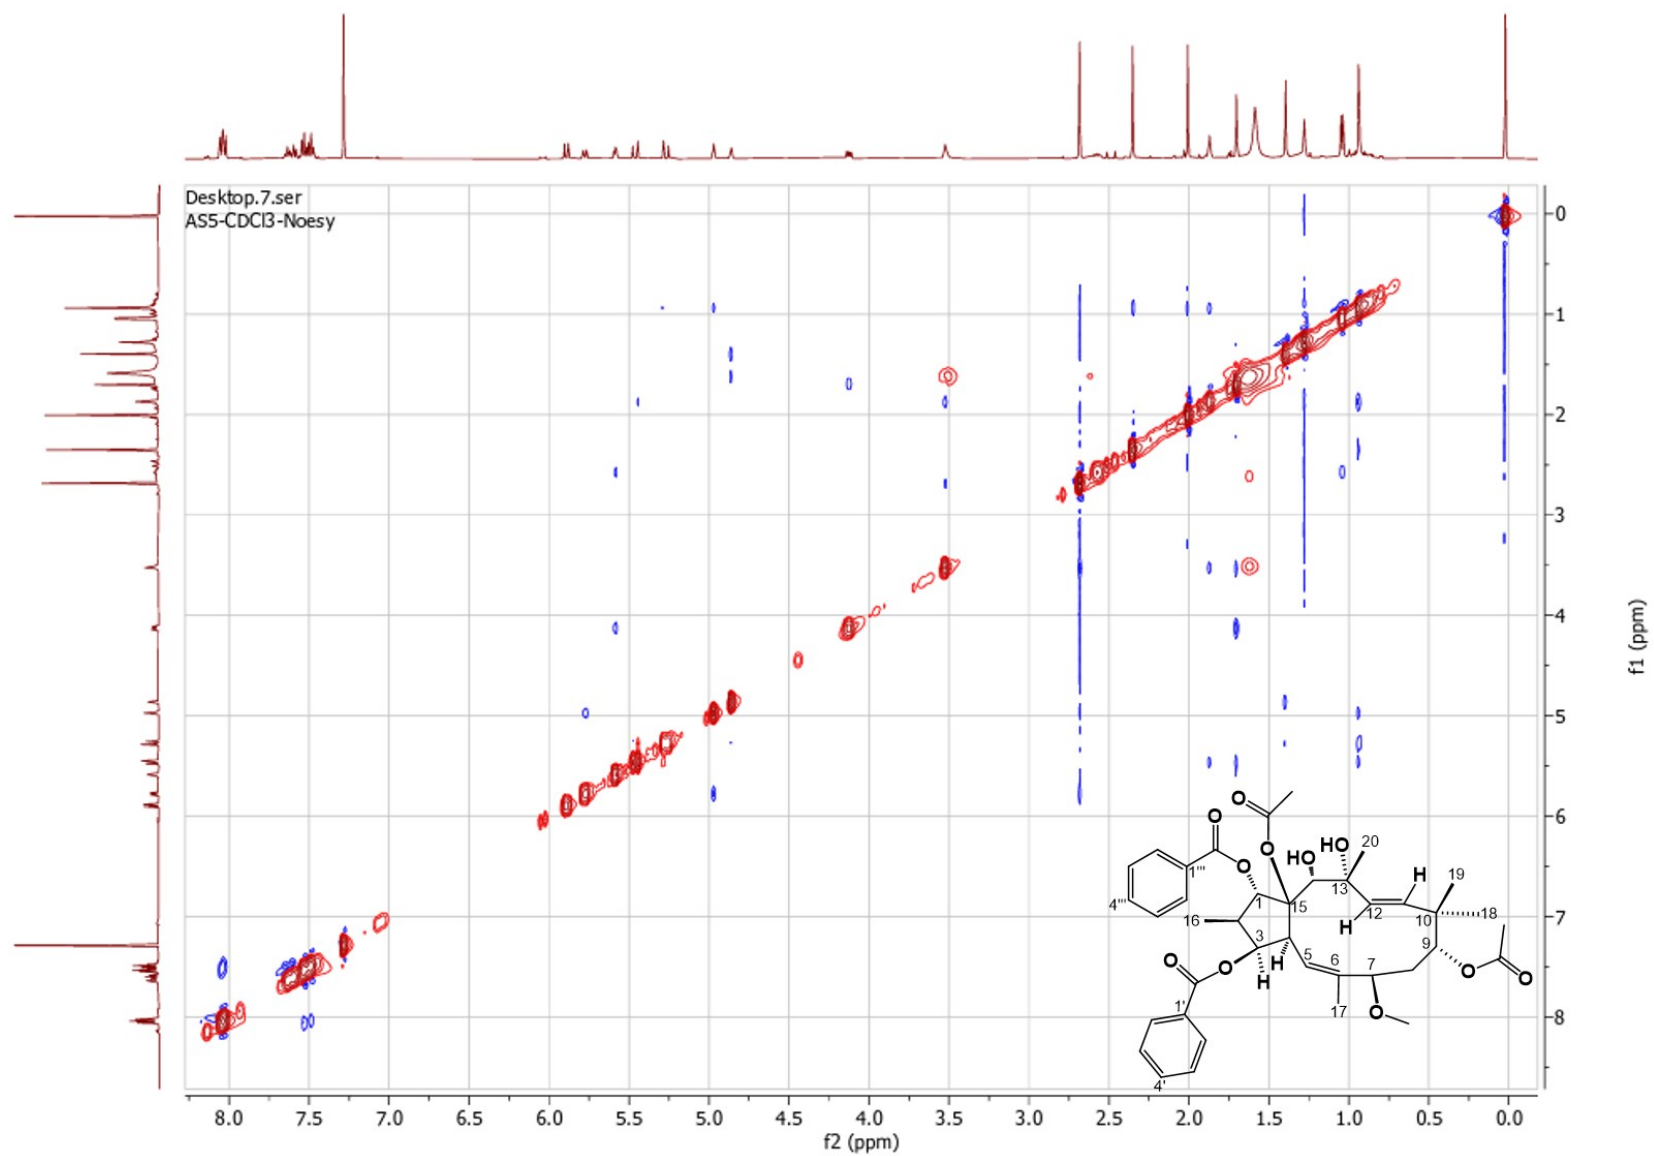

Figure S18. MS spectrum of compound P2 (CDCl<sub>3</sub>)

Qualitative Analysis Report

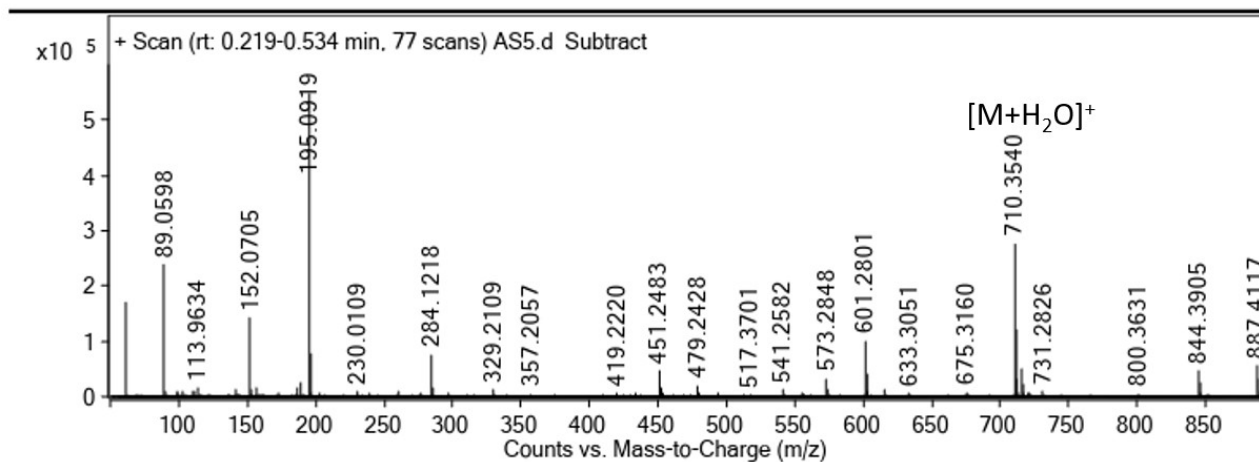

Peak List

| m/z      | z | Abund     |
|----------|---|-----------|
| 61.0285  | 1 | 169672.11 |
| 89.0598  | 1 | 236870.75 |
| 152.0705 | 1 | 141642.3  |
| 188.9844 |   | 26439.52  |
| 195.0919 | 1 | 546454.56 |
| 196.0949 | 1 | 76147.08  |
| 284.1218 | 1 | 75256.98  |
| 451.2483 | 1 | 45962.73  |
| 573.2848 | 1 | 32360.98  |
| 601.2801 | 1 | 99619.84  |
| 602.2833 | 1 | 39579.84  |
| 710.354  | 1 | 275875.59 |
| 711.3573 | 1 | 119438.33 |
| 712.3597 | 1 | 31923.49  |
| 715.3092 | 1 | 48769.35  |
| 716.3123 | 1 | 20847.97  |
| 844.3905 | 1 | 45516.91  |
| 845.3935 | 1 | 24288.24  |
| 887.4117 | 1 | 55378.14  |
| 888.4146 | 1 | 32324.56  |

Figure S19. Structural novelty check of compound P2

Launch Meeting - Zoom | YouTube - YouTube | Facebook | Drawn Structure Substance Search

sofinder-n.cas.org/search/substance/6373b1b1192c317d2fd20090/1

CAS Scifinder® Substances Enter a query...

### Substances search for drawn structure

References Reactions Suppliers Save and Alert

Structure Match

- As Drawn (0)
- Substructure (2)**
- Similarity (155K)

Analyze Structure Precision

Chemscape Analysis

Visually explore structure similarity with a powerful new tool. Learn more about Chemscape.

Create Chemscape Analysis

Filter Behavior

2 Results Sort: Relevance View: Partial

1

1946844-18-3

Absolute stereochemistry shown, Rotation (-)  
E/Z labels describe double bond geometry

$C_{45}H_{50}O_{12}$

2 References 2 Reactions 1 Supplier

2

1946844-15-0

Absolute stereochemistry shown, Rotation (-)  
E/Z labels describe double bond geometry

$C_{45}H_{49}BrO_{12}$

Benzoic acid, 4-bromo-, (1S,2R,3S,3aS,4E,6R,8R,10E,12R,13R,13aR)-8,13a-bis(acety...

2 References 2 Reactions 1 Supplier

Feedback

100% 27°C ENG 10:35 PM

Substances 10:35 PM

As Drawn (0)  
Substructure (2)  
Similarity (155K)

Rerun Search

Edit Search

Figure S20. <sup>1</sup>H-NMR (600 MHz, Acetone-*d*<sub>6</sub>) spectrum of compound P3

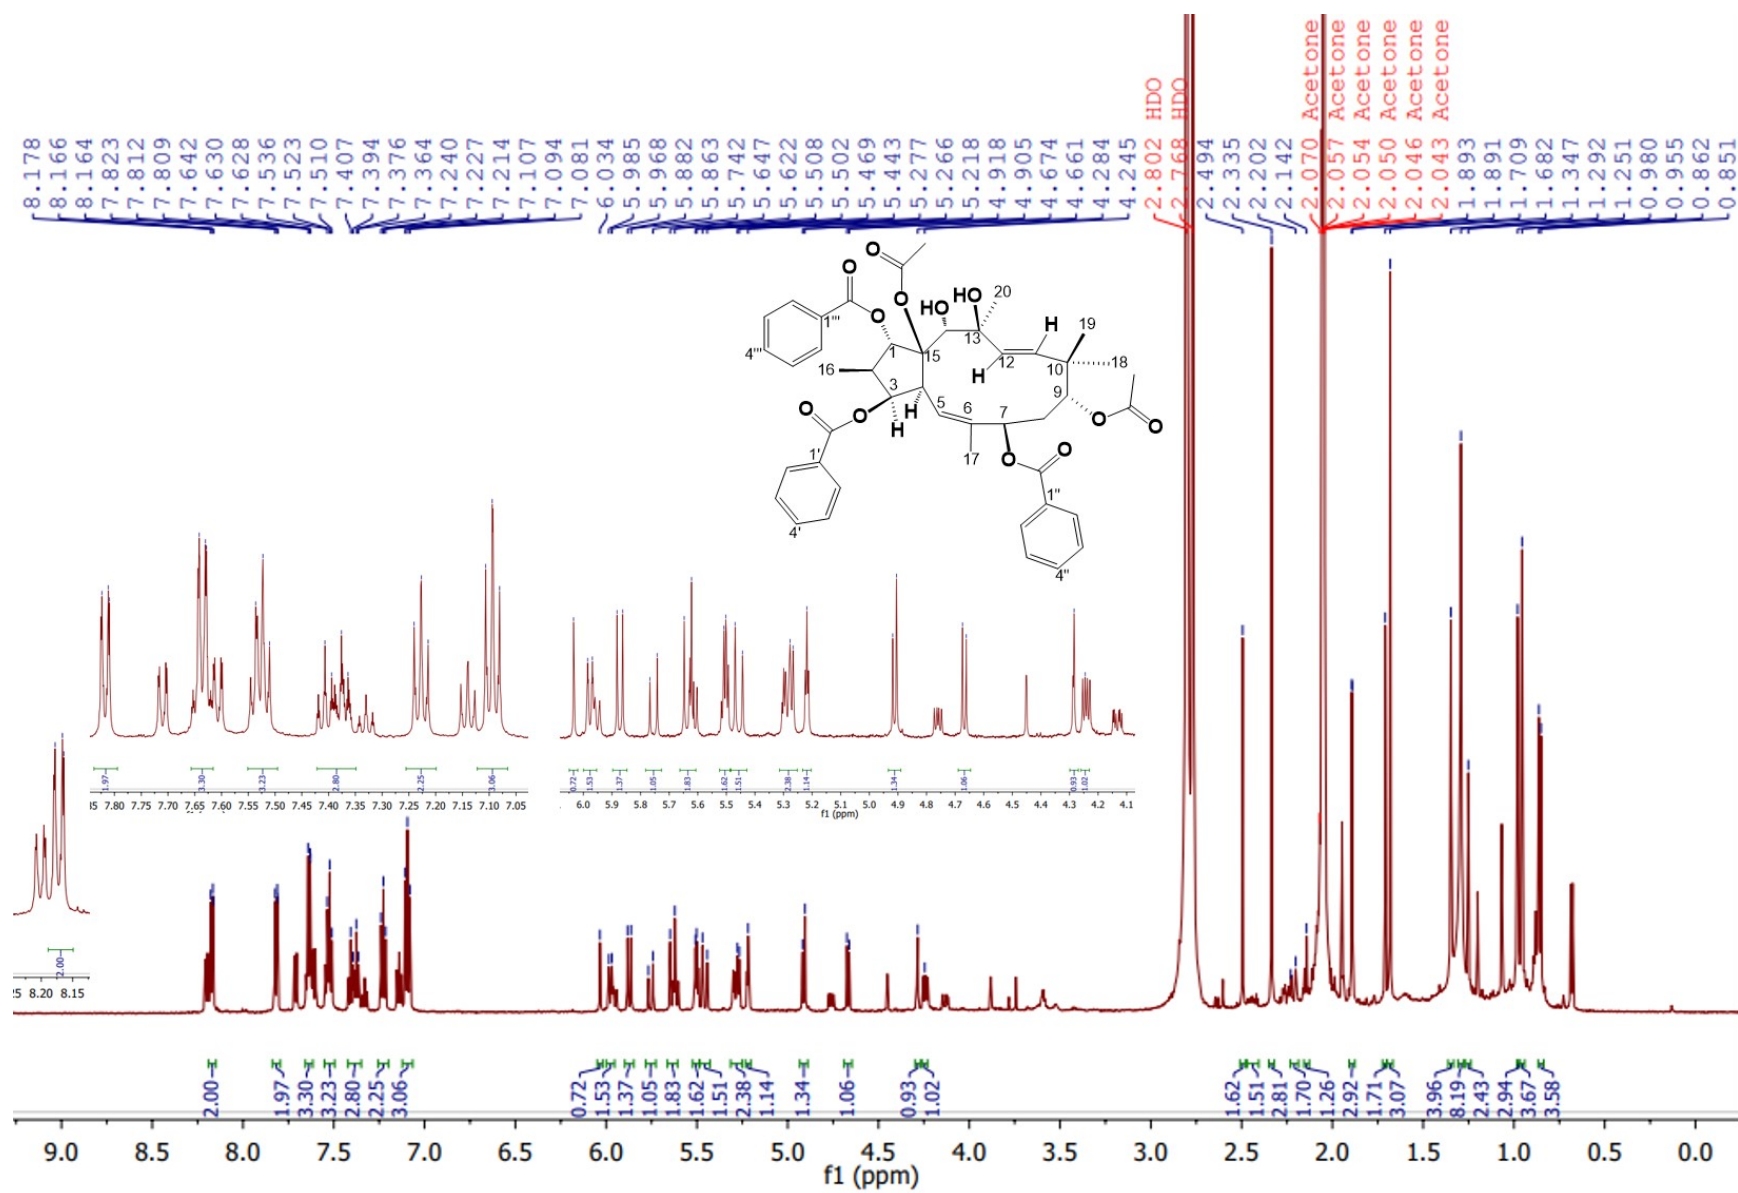

Figure S21.  $^1\text{H-NMR}$  (600 MHz, Acetone- $d_6$ ) (sketched) spectrum of compound **P3**

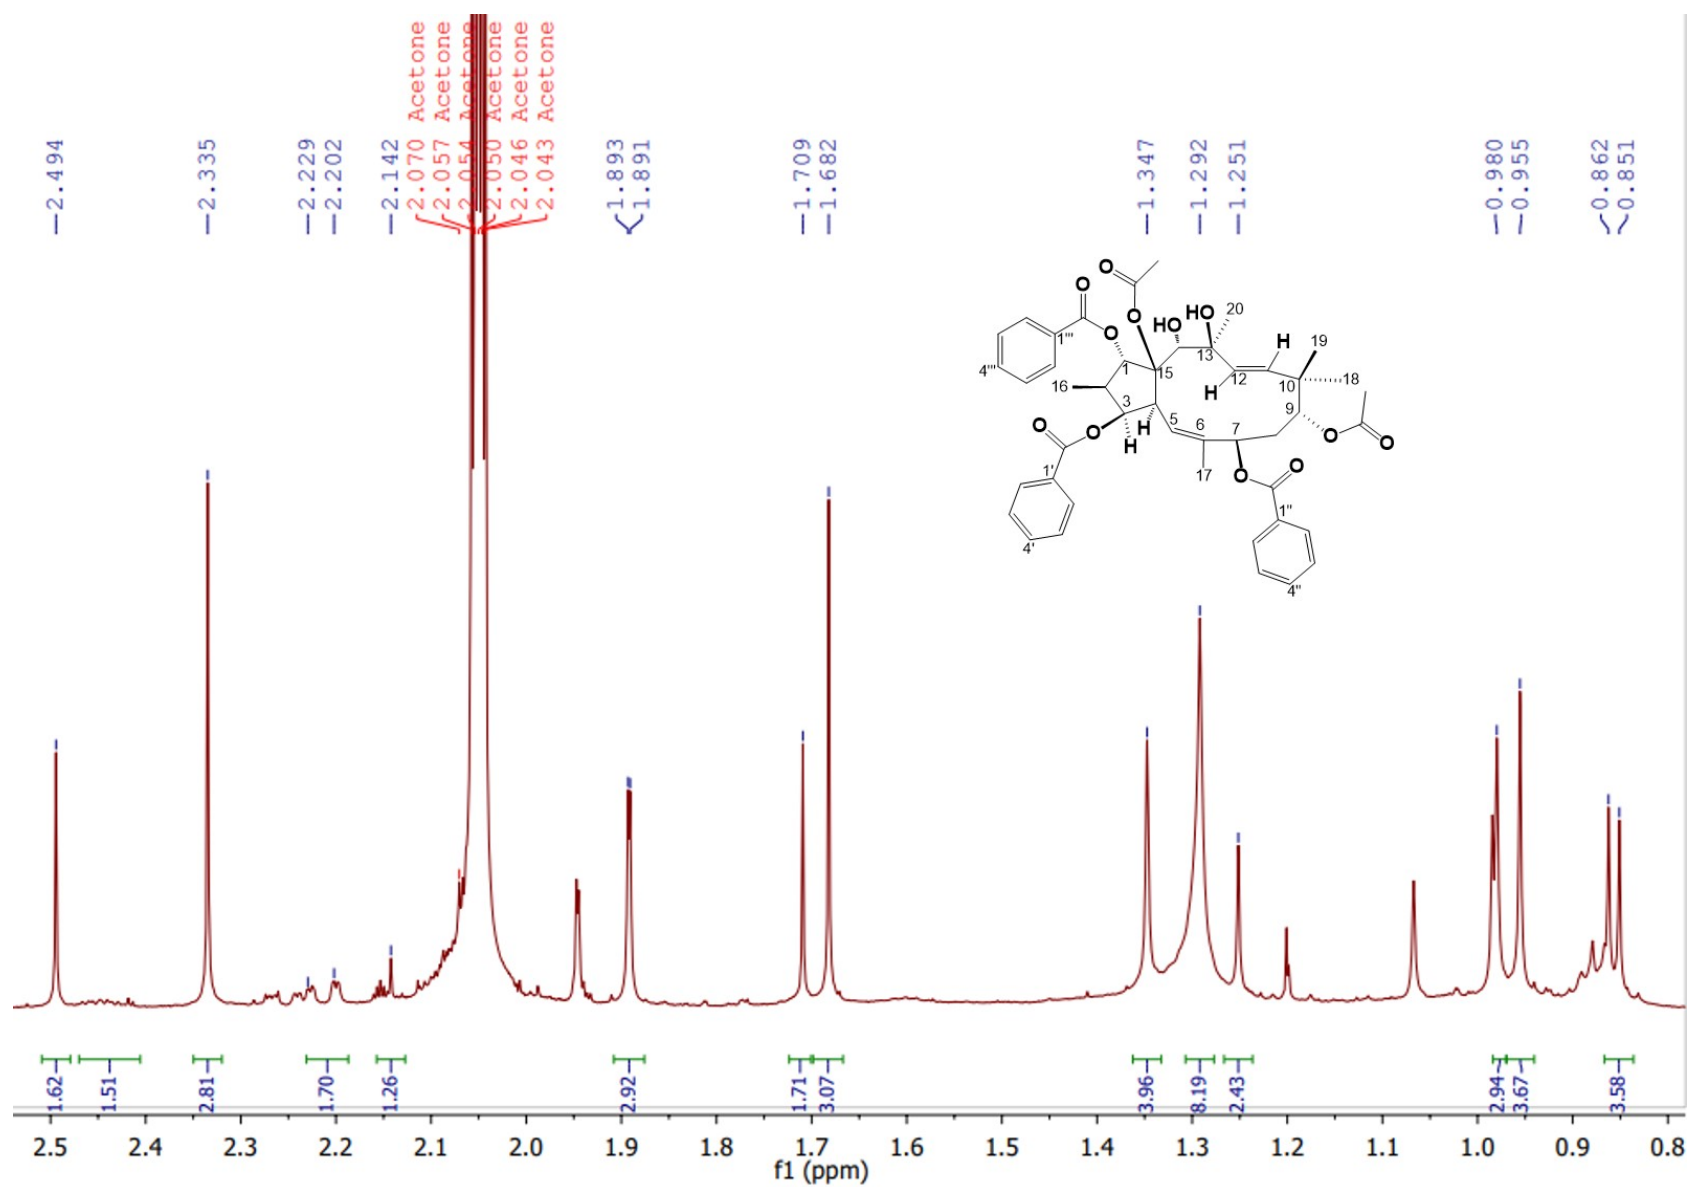

Figure S22.  $^{13}\text{C}$ -NMR (125 MHz, Acetone- $d_6$ ) spectrum of compound P3

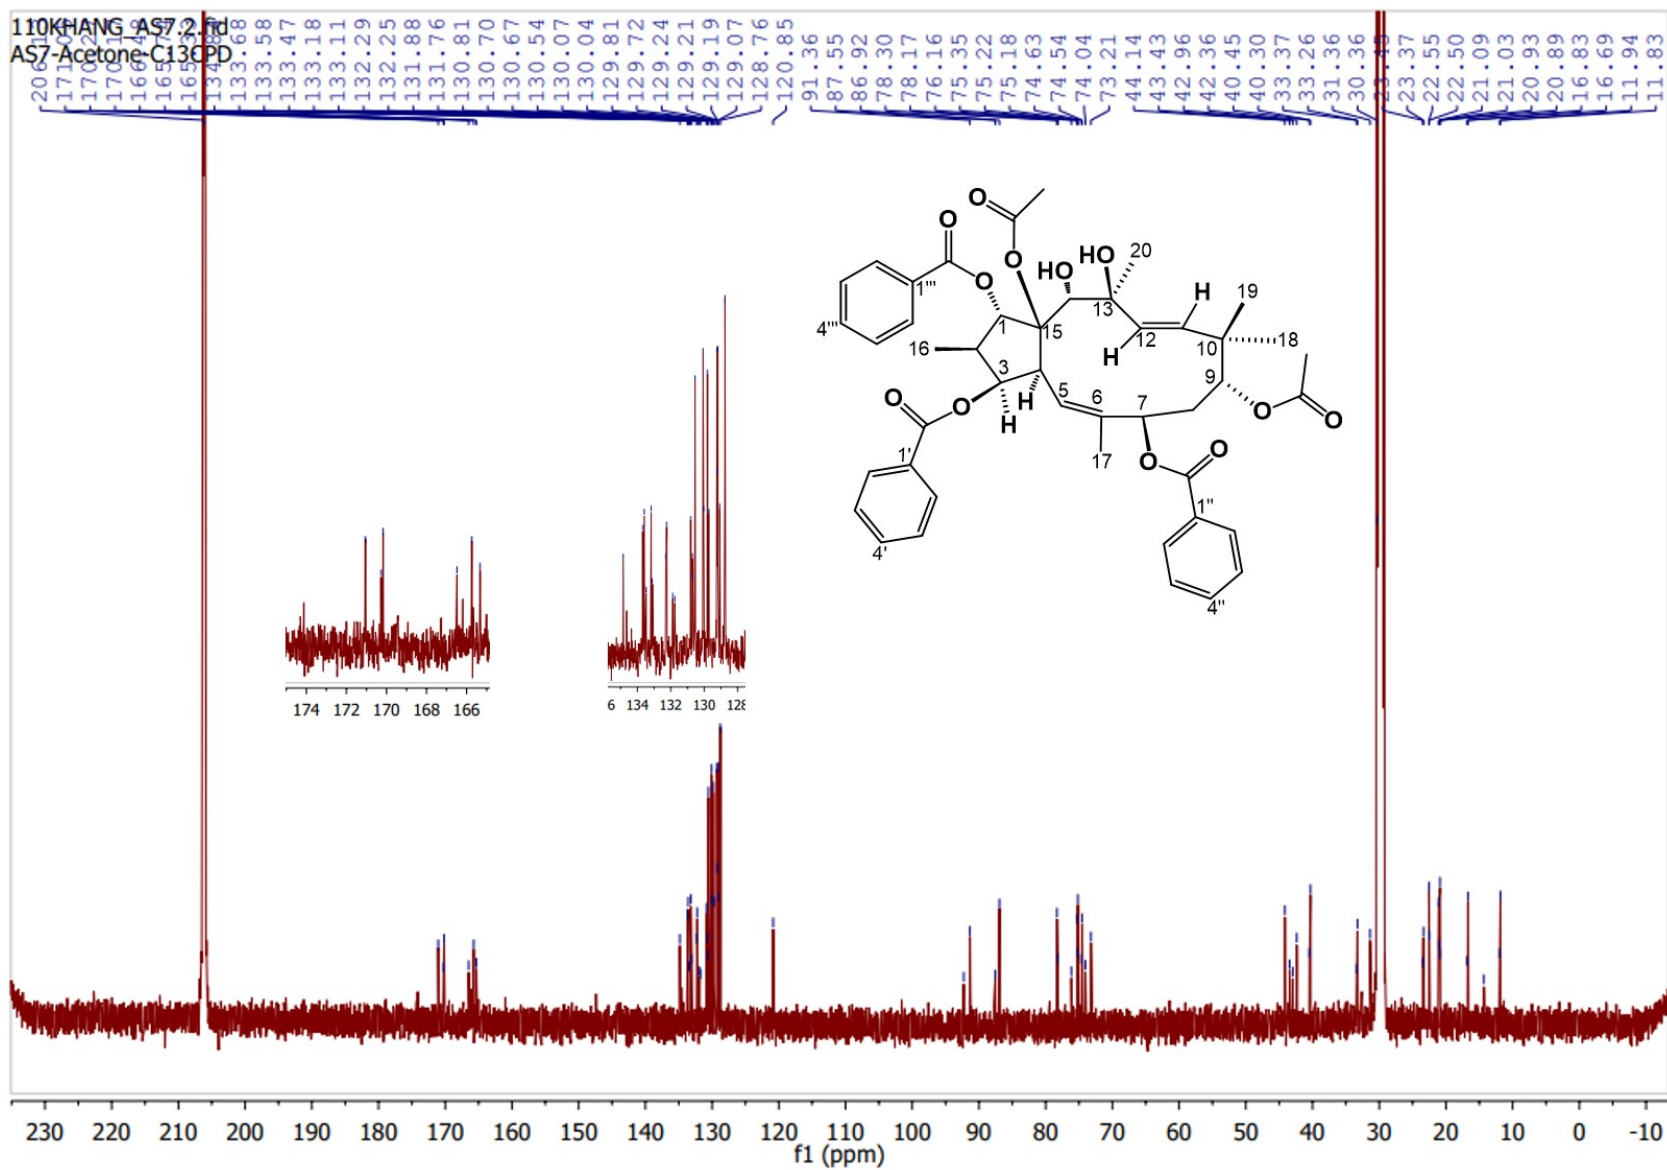

Figure S23. COSY spectrum of compound **P3** (Acetone- $d_6$ )

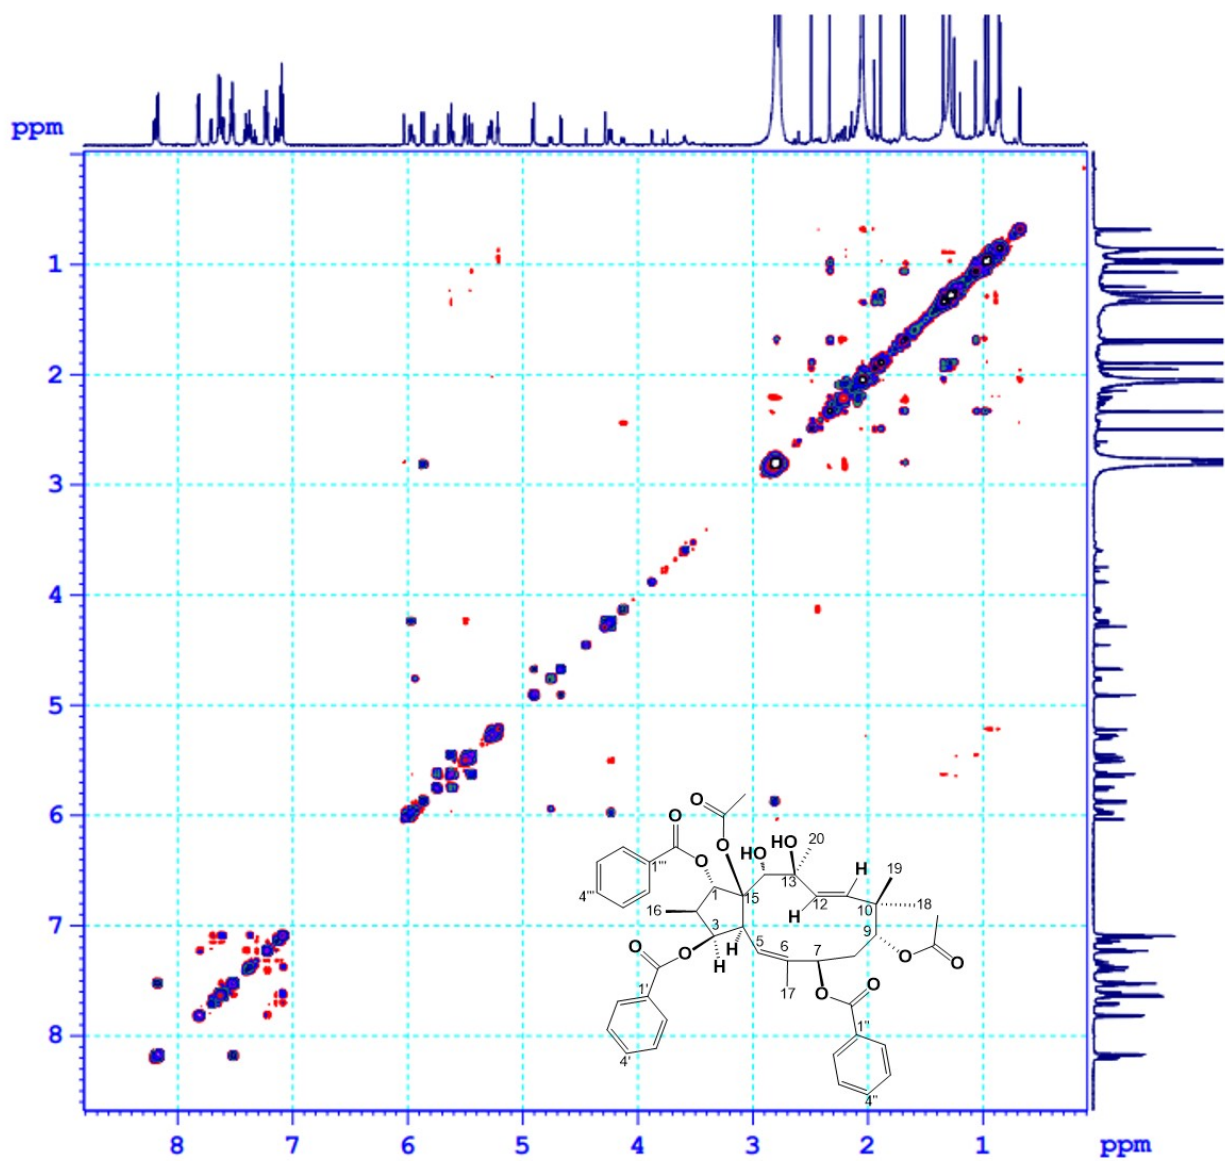



Figure S24. HSQC spectrum (total) of compound **P3** (Acetone- $d_6$ )

AS07 HSQC

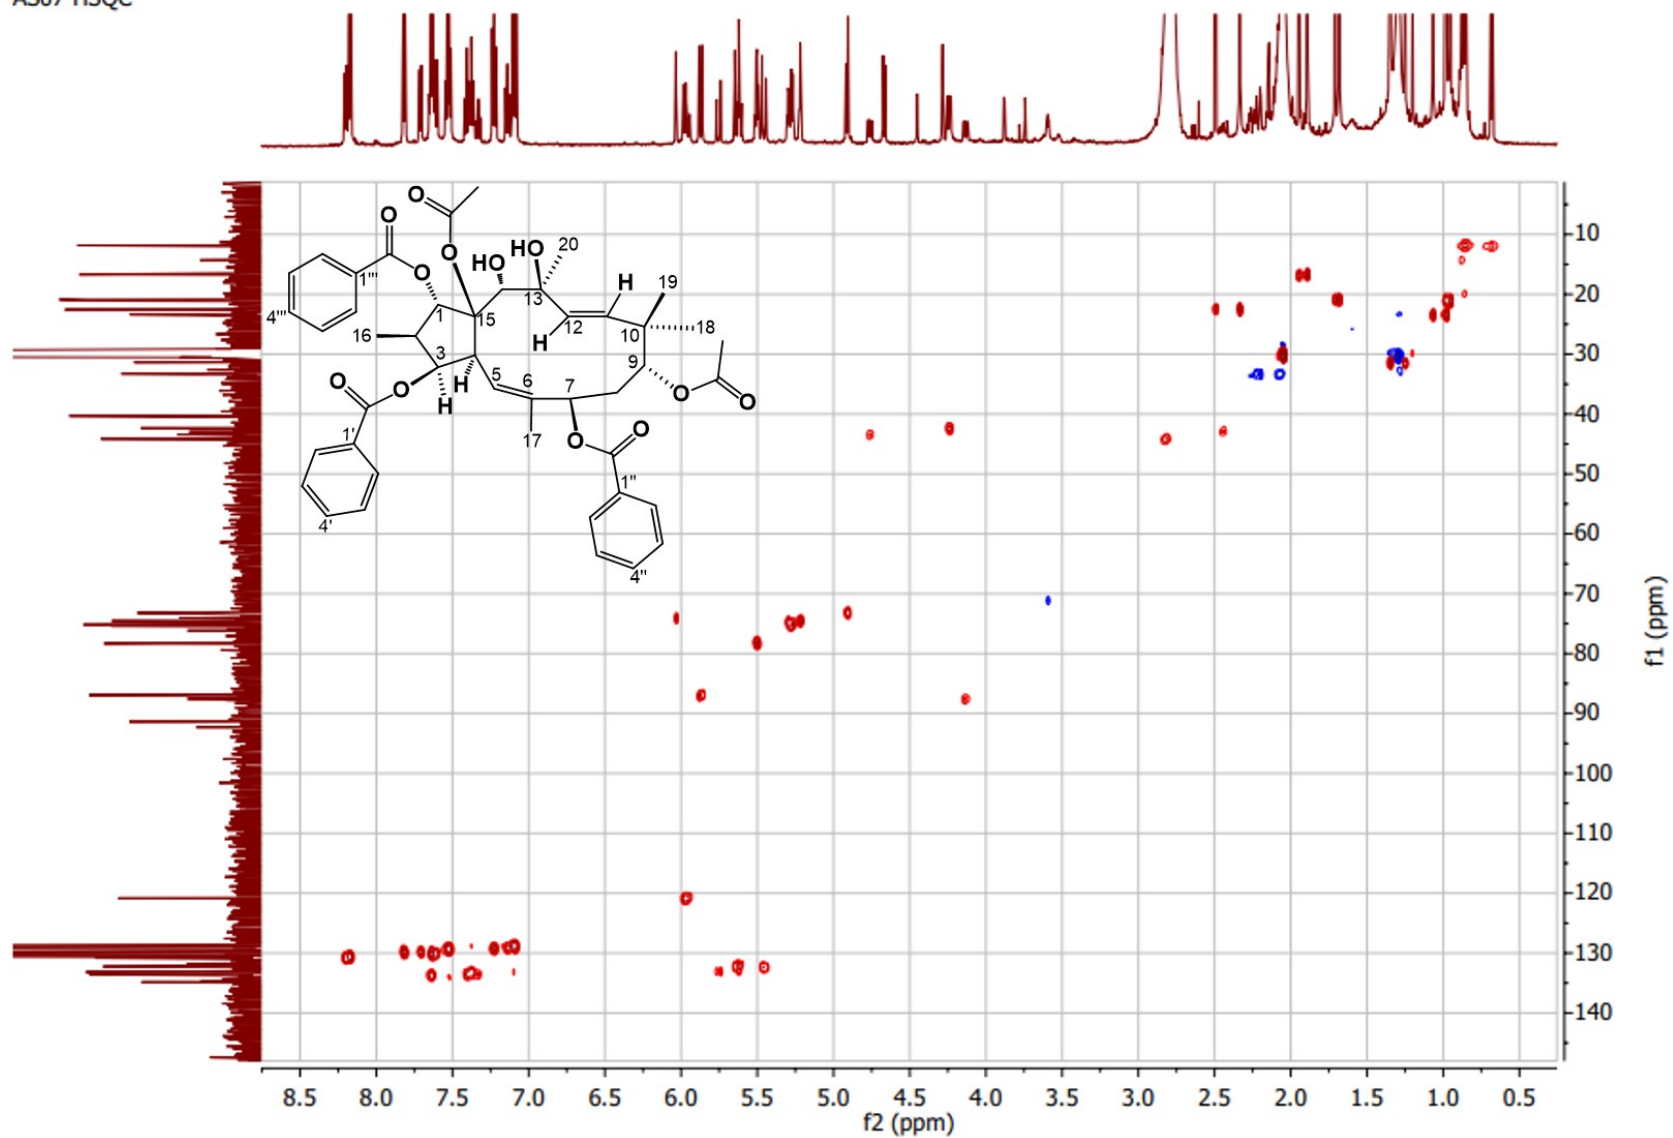

Figure S25. HSQC spectrum (sketched) of compound **P3** (Acetone- $d_6$ )

AS07 HSQC

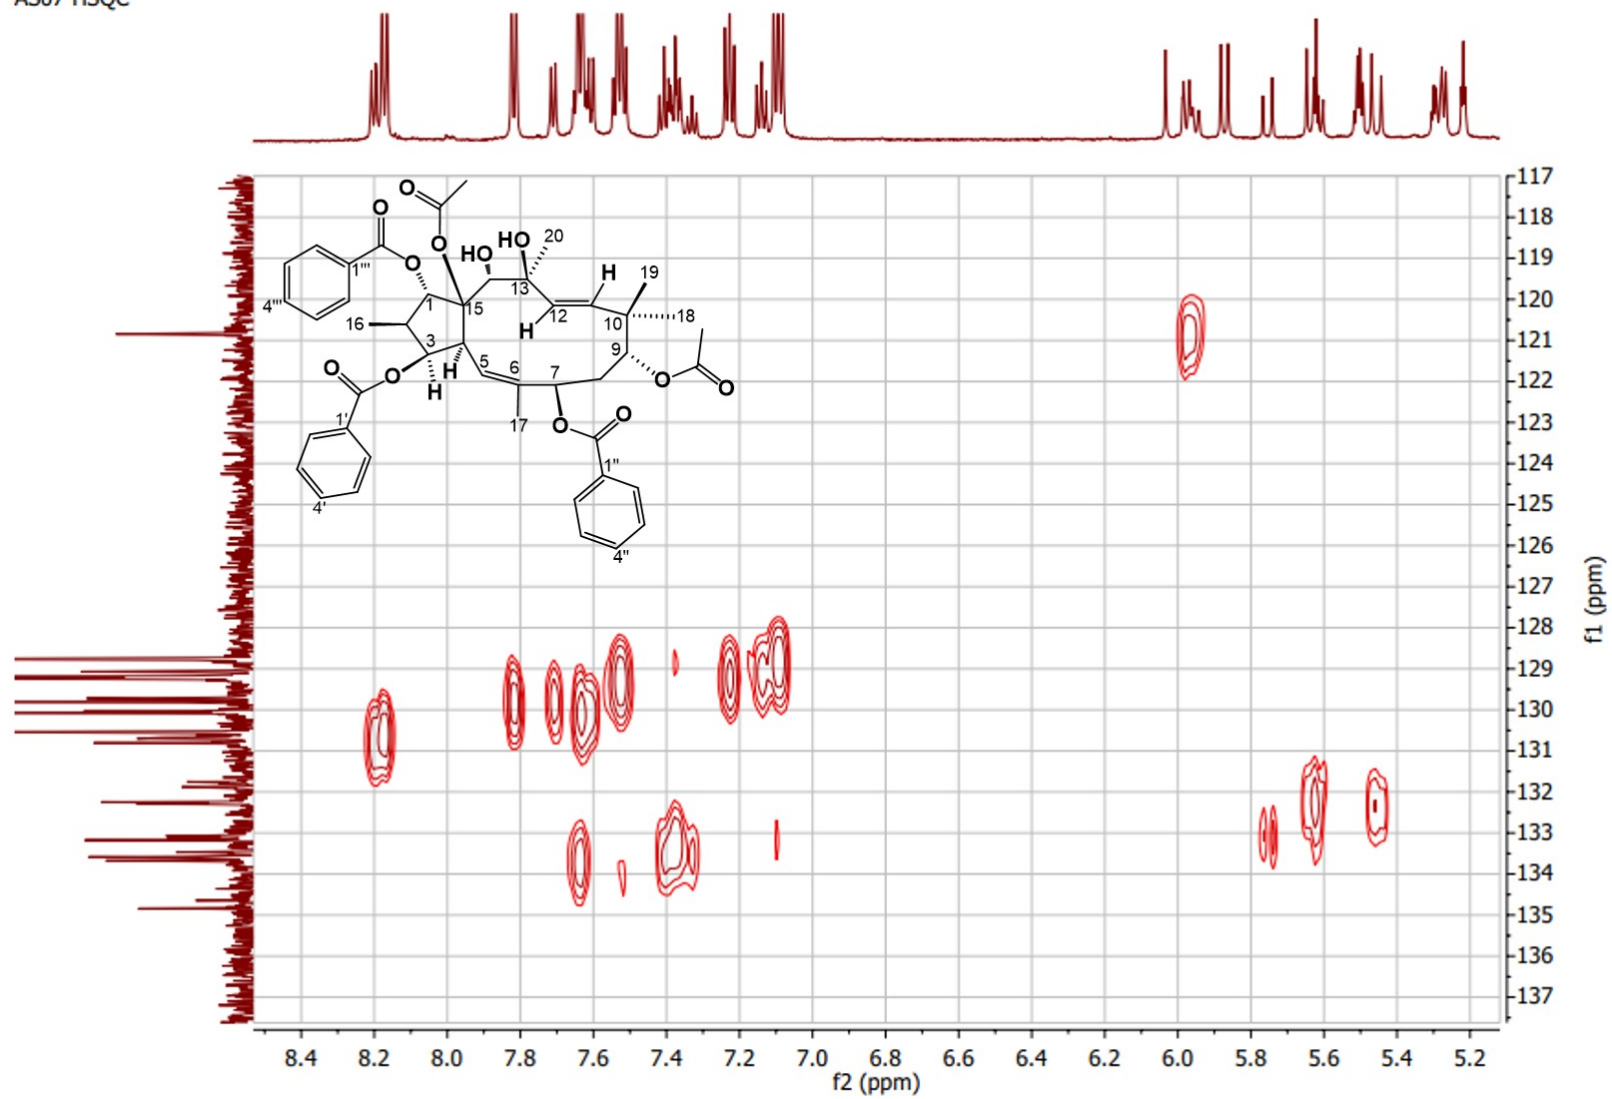

Figure S26. HMBC spectrum (total) of compound **P3** (Acetone- $d_6$ )

AS07 HMBC

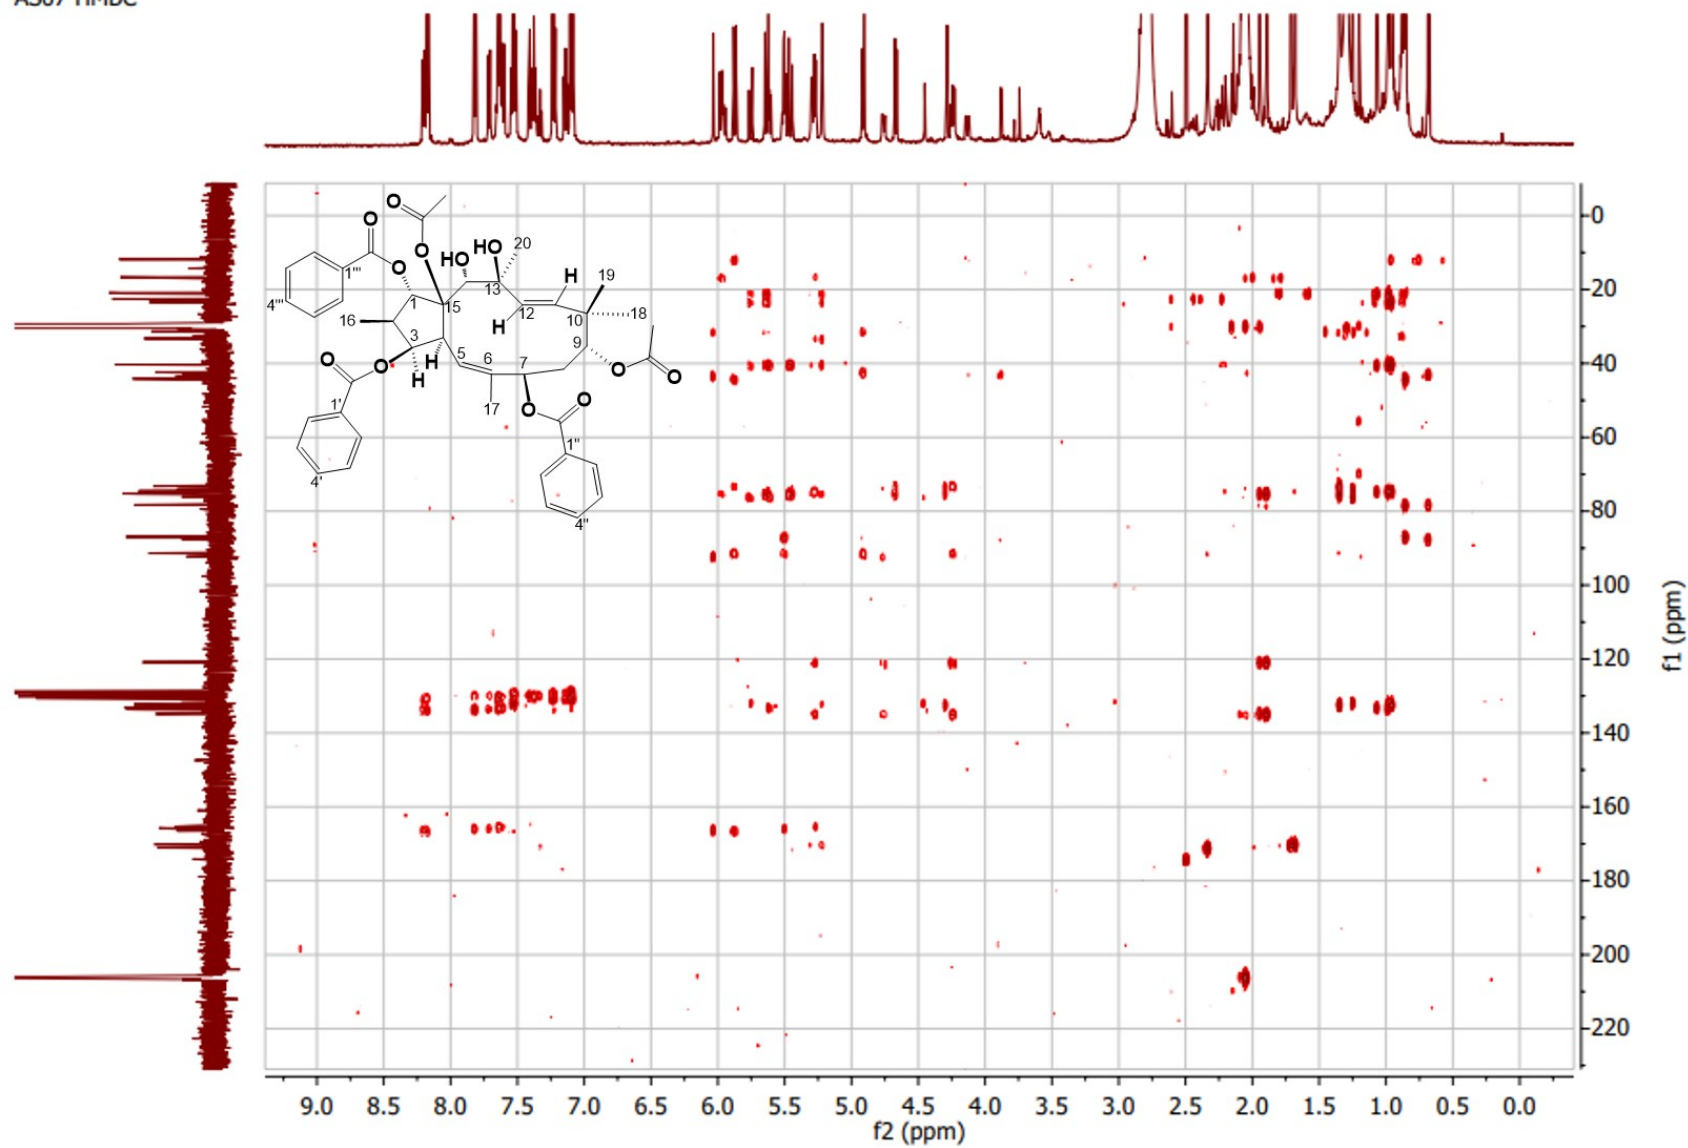

Figure S27. HMBC spectrum (sketched) of compound **P3** (Acetone- $d_6$ )

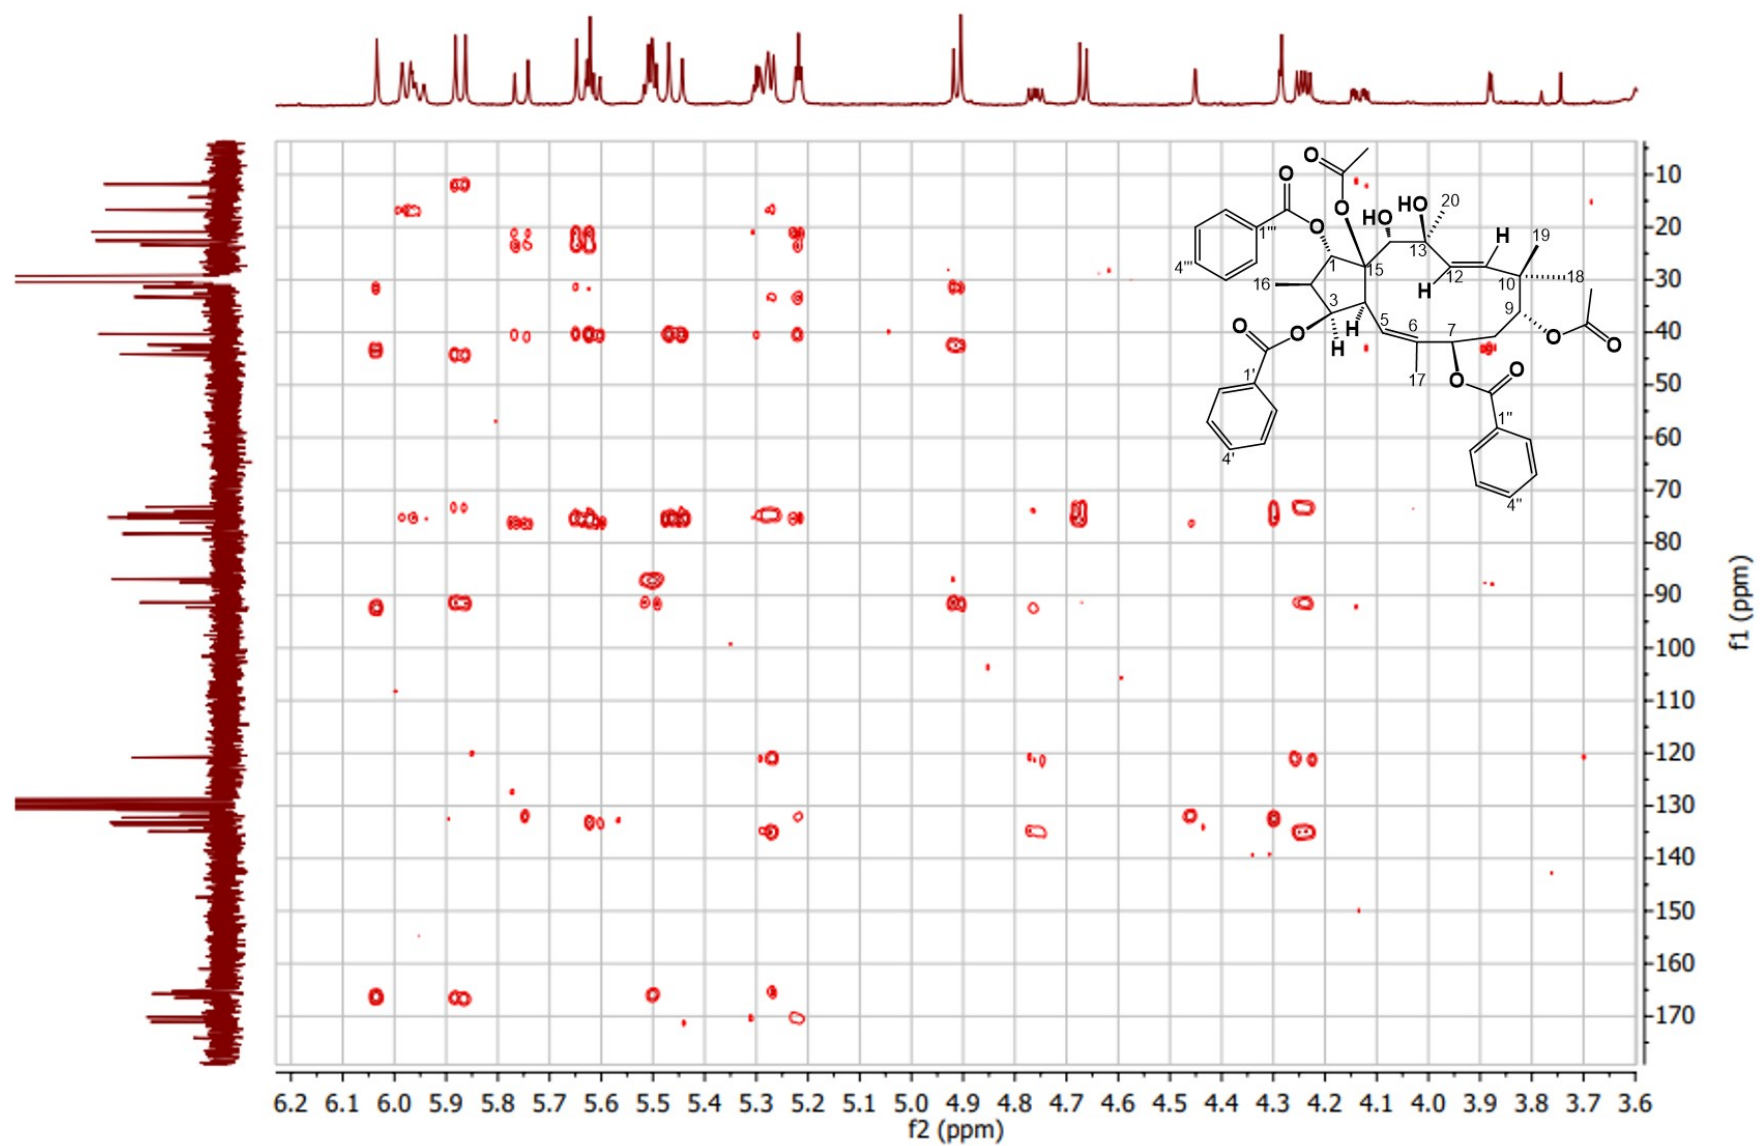

Figure S28. HMBC spectrum (sketched) of compound P3 (Acetone- $d_6$ )

AS07 HMBC

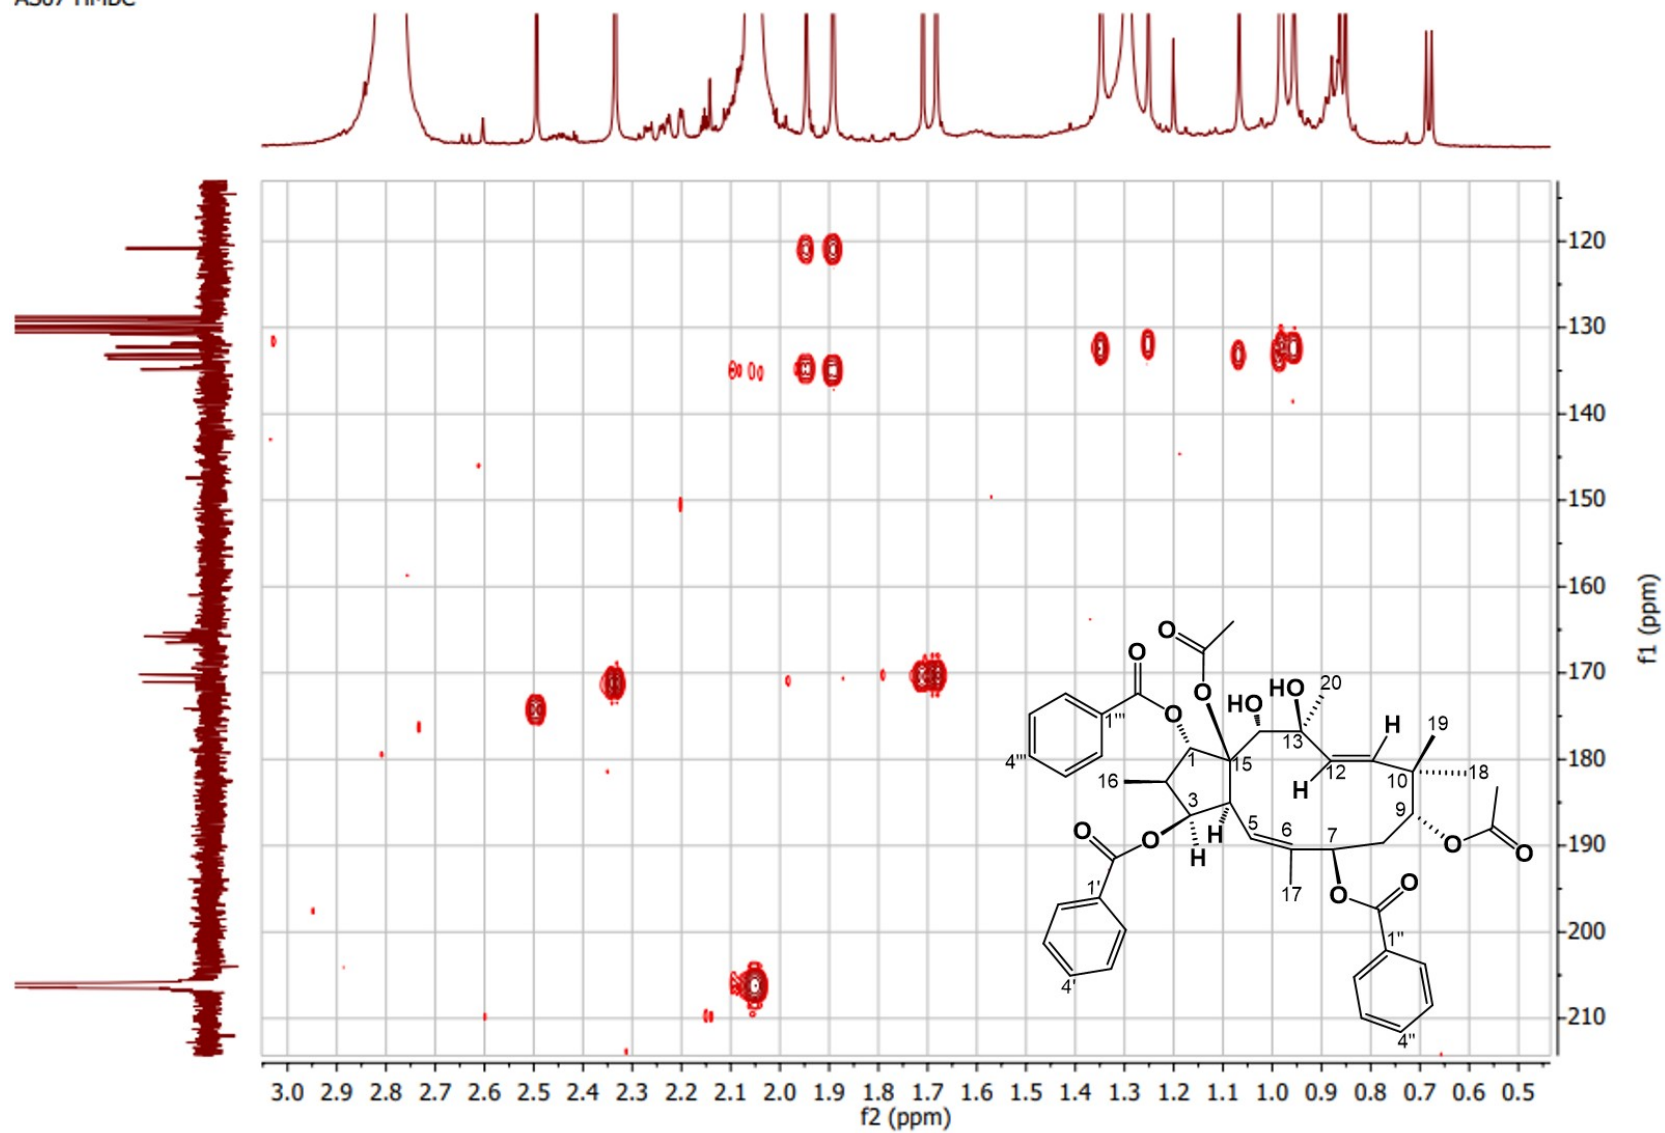

Figure S29. HMBC spectrum (sketched) of compound **P3** (Acetone- $d_6$ )

AS07 HMBC

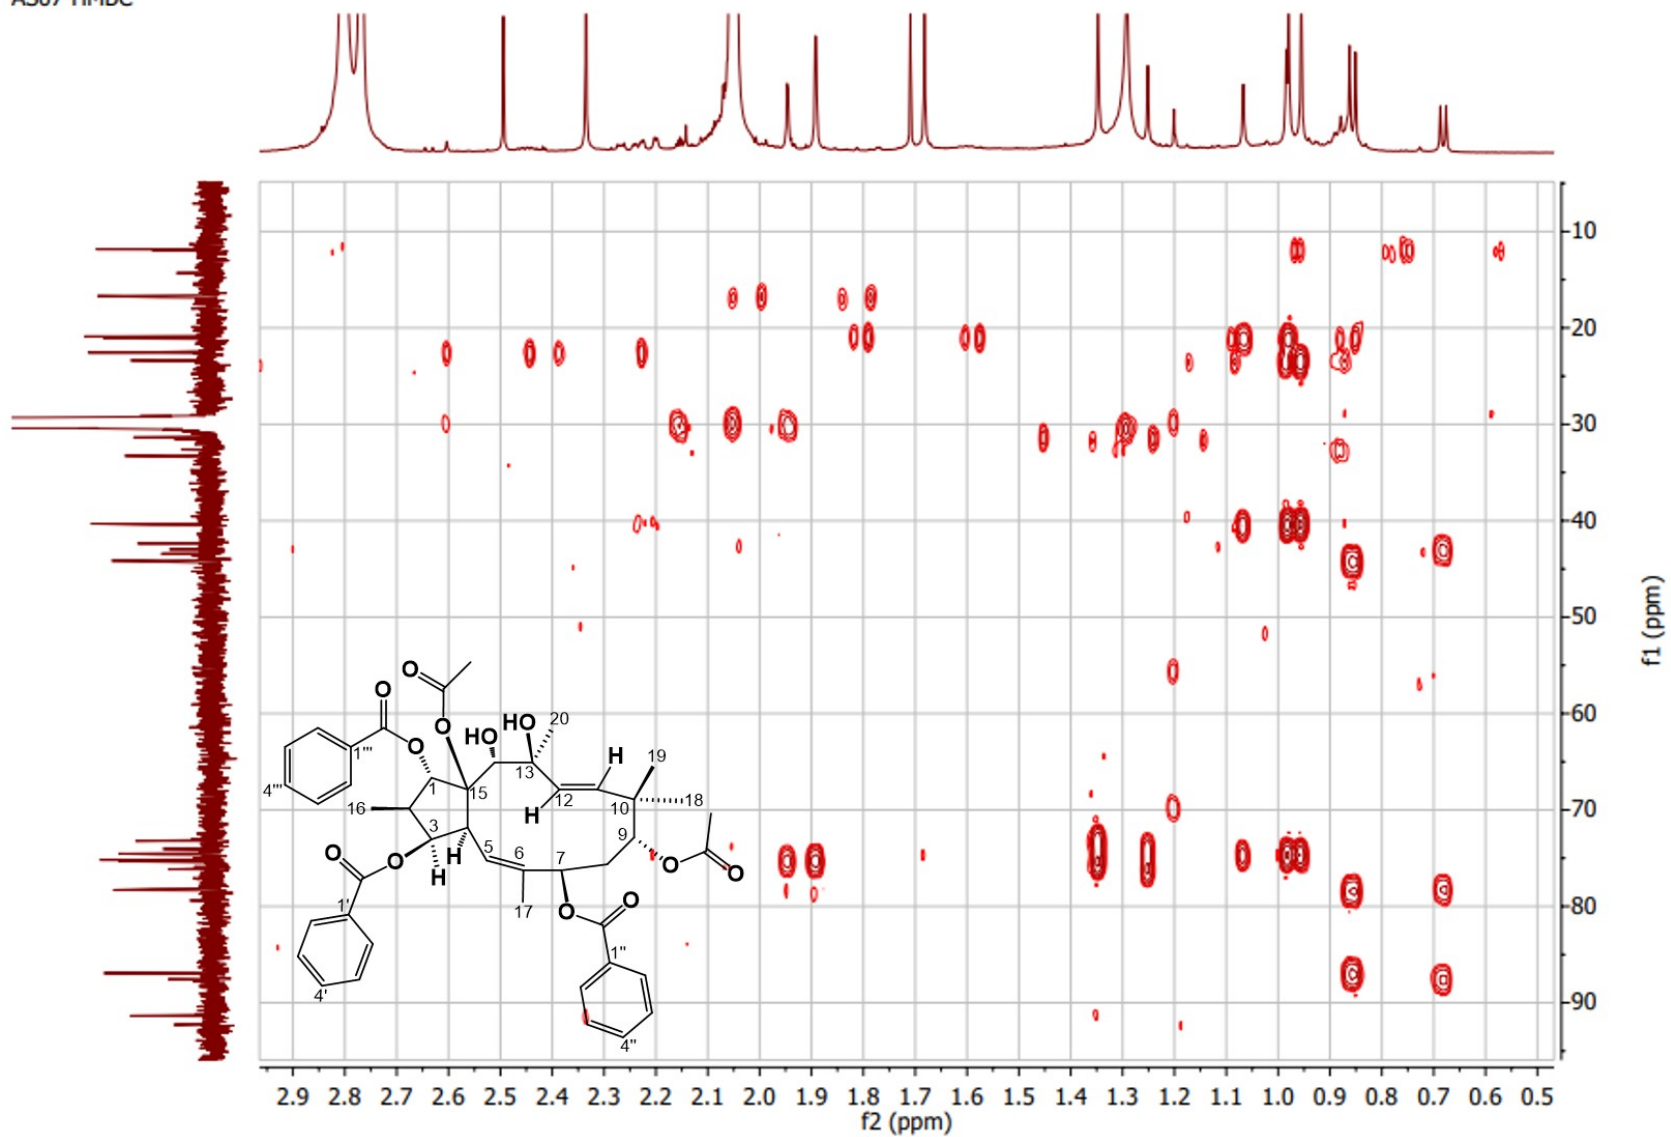

Figure S30. NOESY spectrum of compound **P3** (Acetone- $d_6$ )

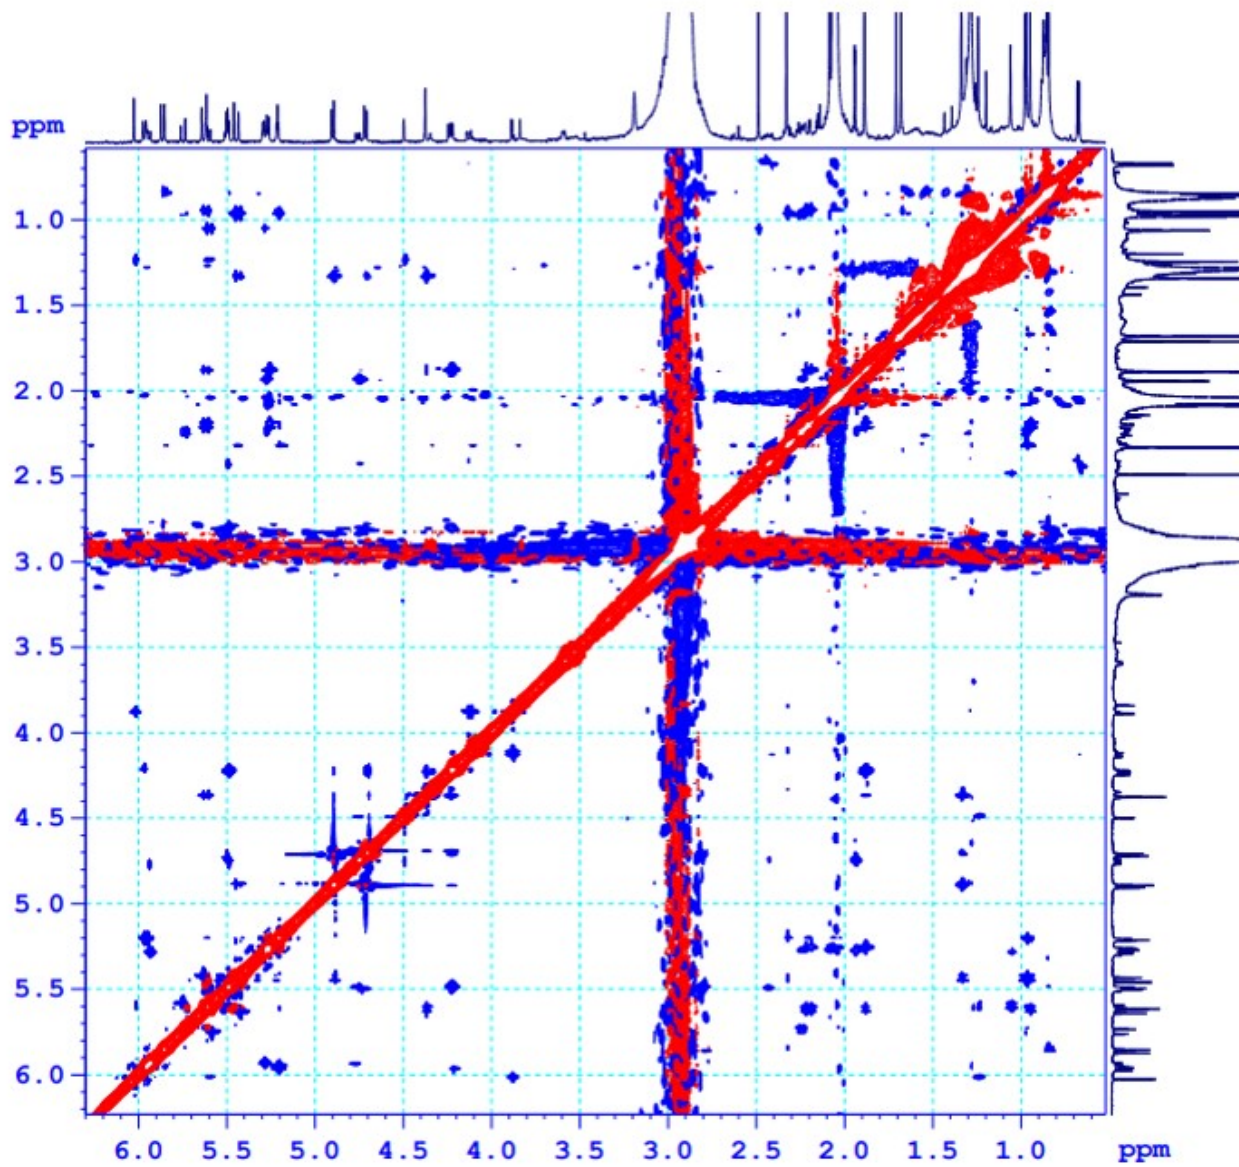

Figure S31. NOESY spectrum (sketched) of compound P3 (Acetone- $d_6$ )

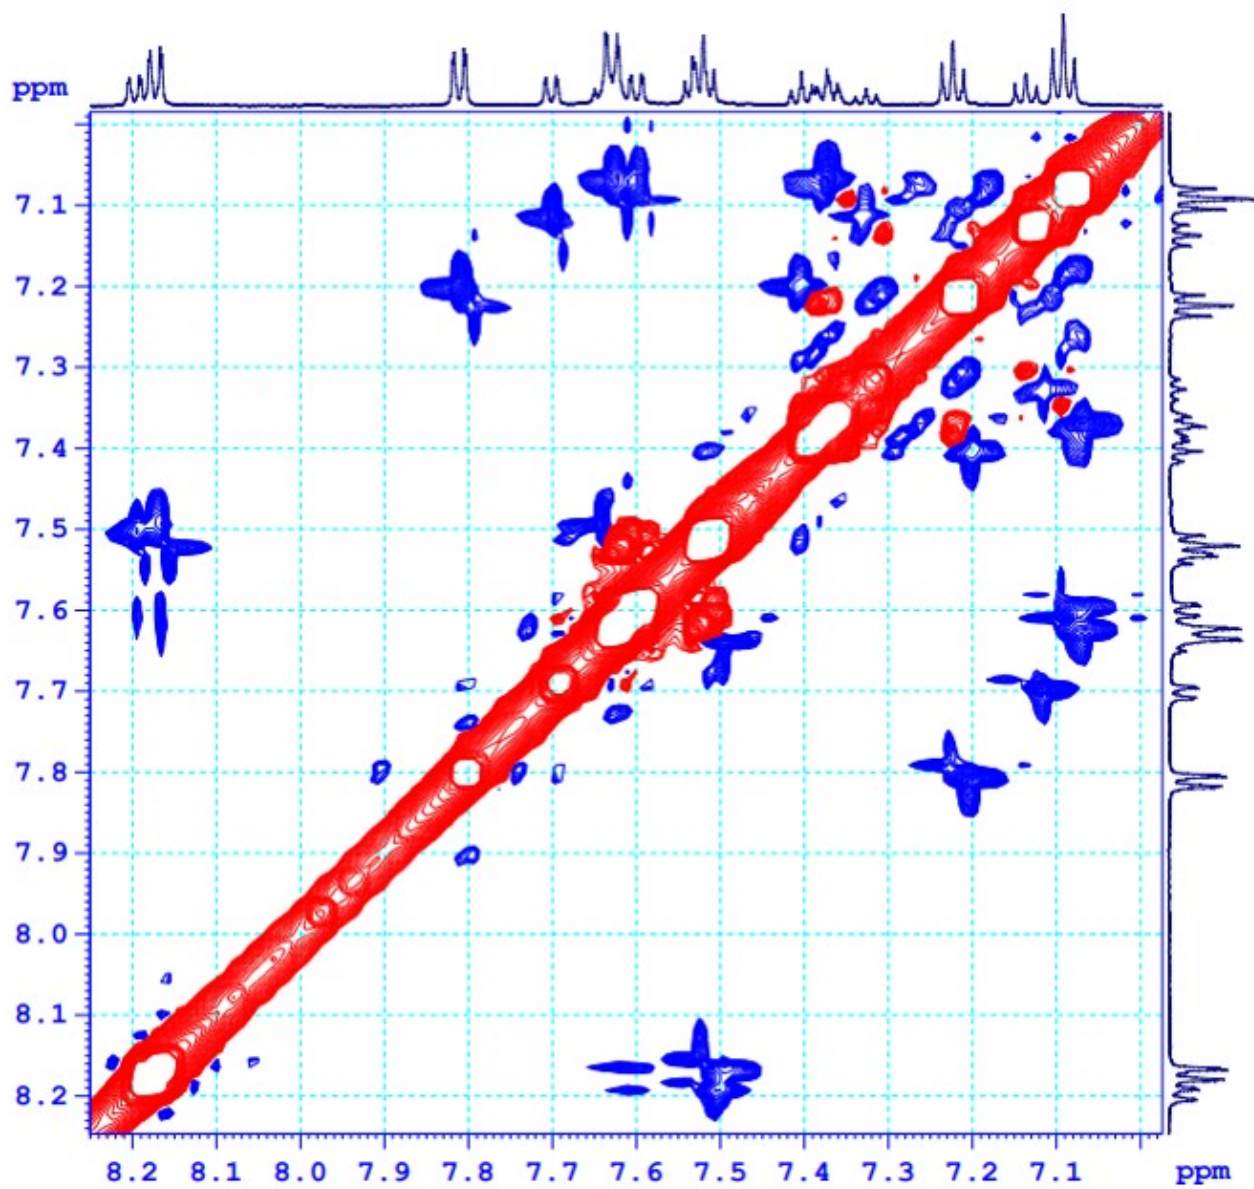



Figure S32. NOESY spectrum (sketched) of compound P3 (Acetone- $d_6$ )

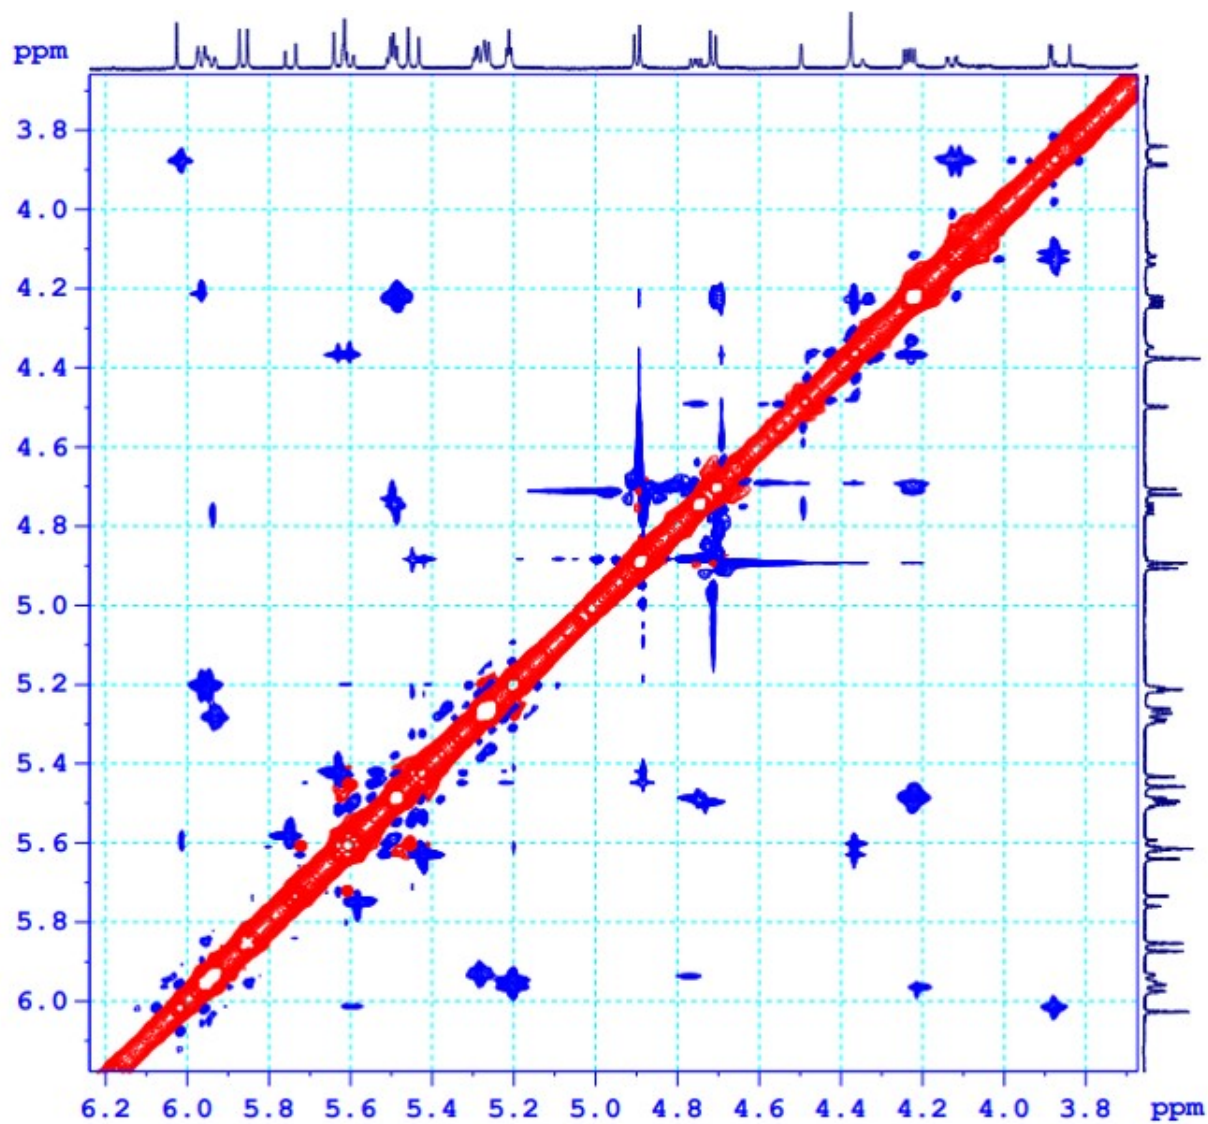

Figure S33. MS spectrum of compound **P3** (Acetone- $d_6$ )

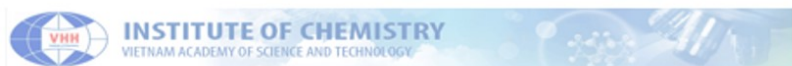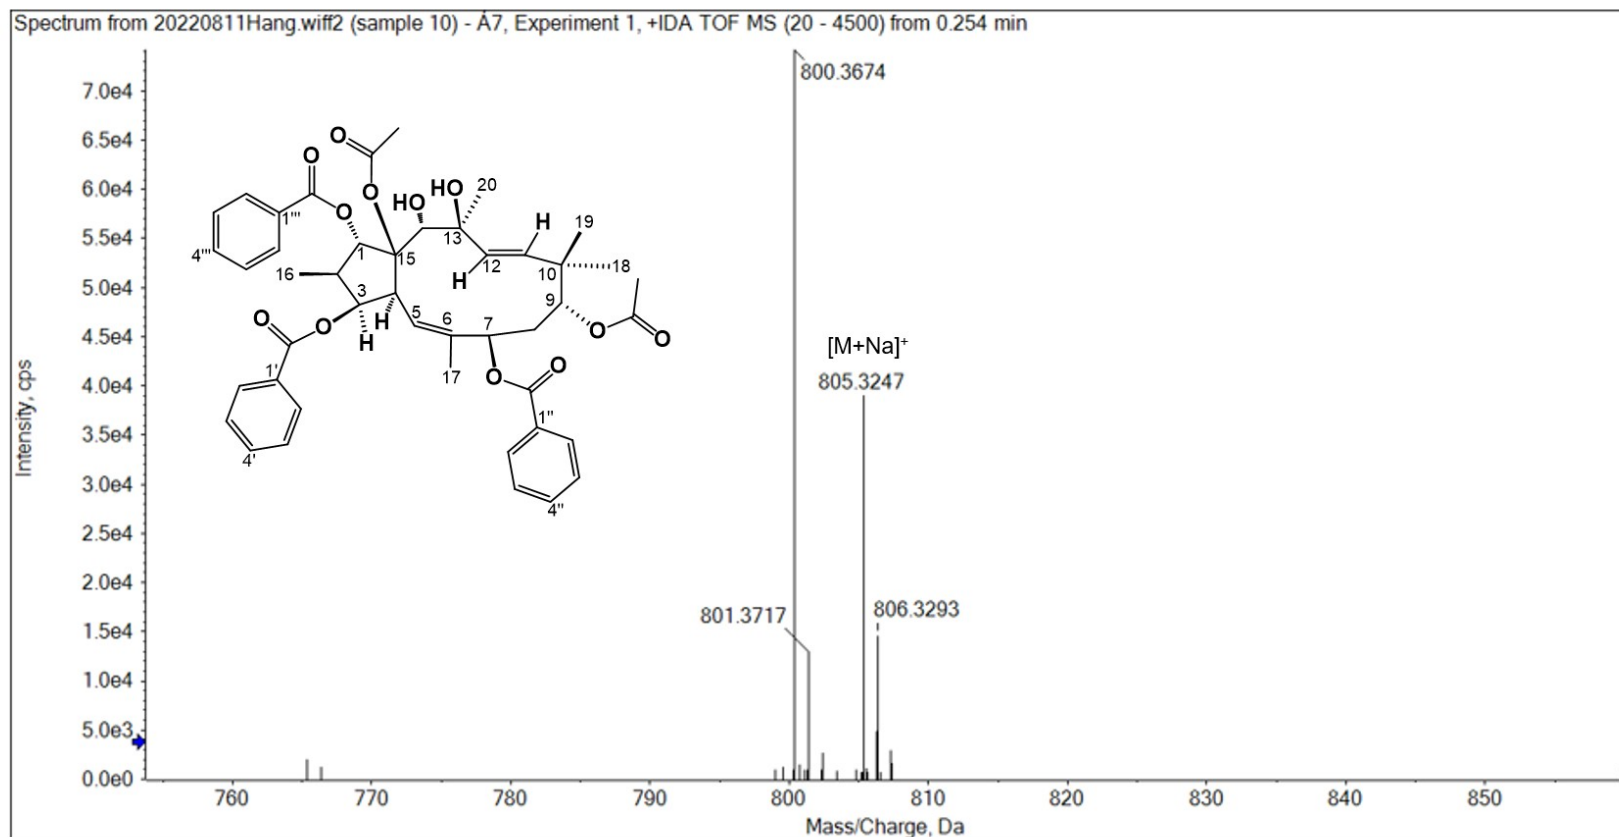

Figure S34. <sup>1</sup>H-NMR (600 MHz) spectrum of compound P4 (CDCl<sub>3</sub>)

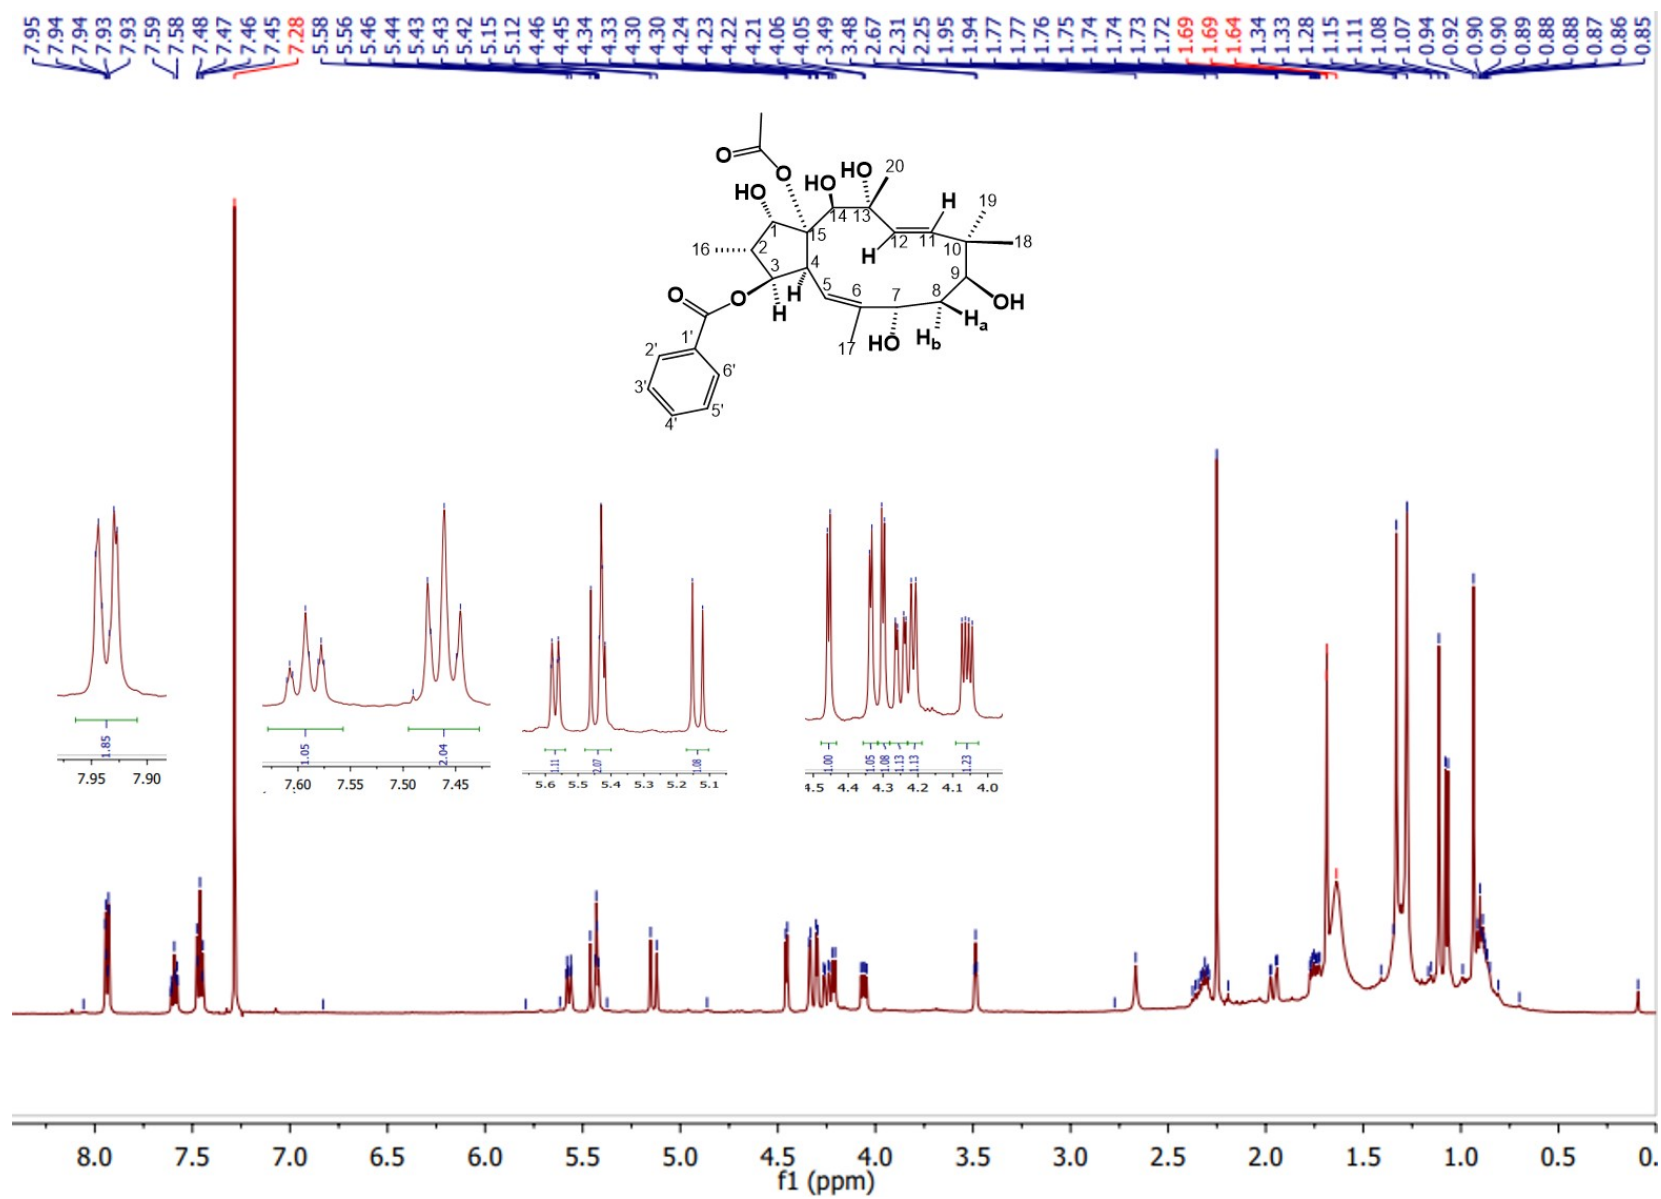

Figure S35.  $^{13}\text{C}$ -NMR (125 MHz) spectrum of compound **P4** ( $\text{CDCl}_3$ )

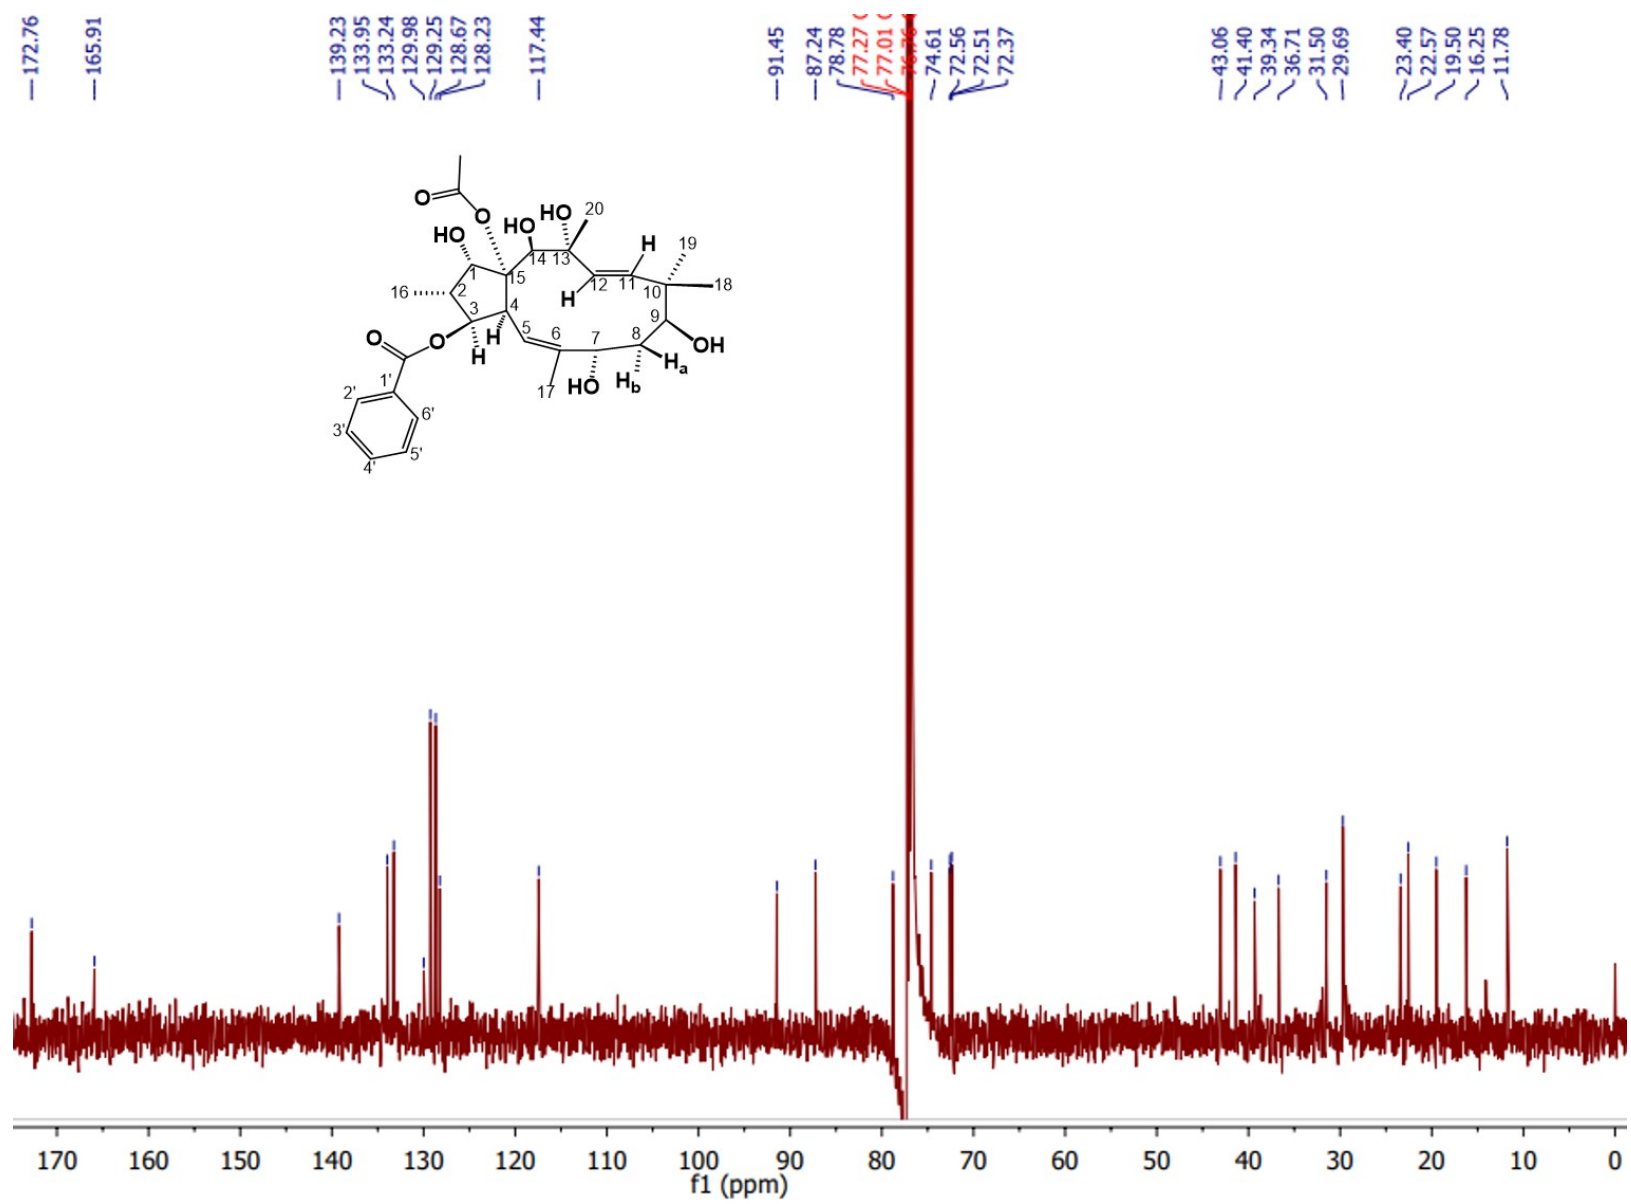

Figure S36. COSY spectrum of compound P4 (CDCl<sub>3</sub>)

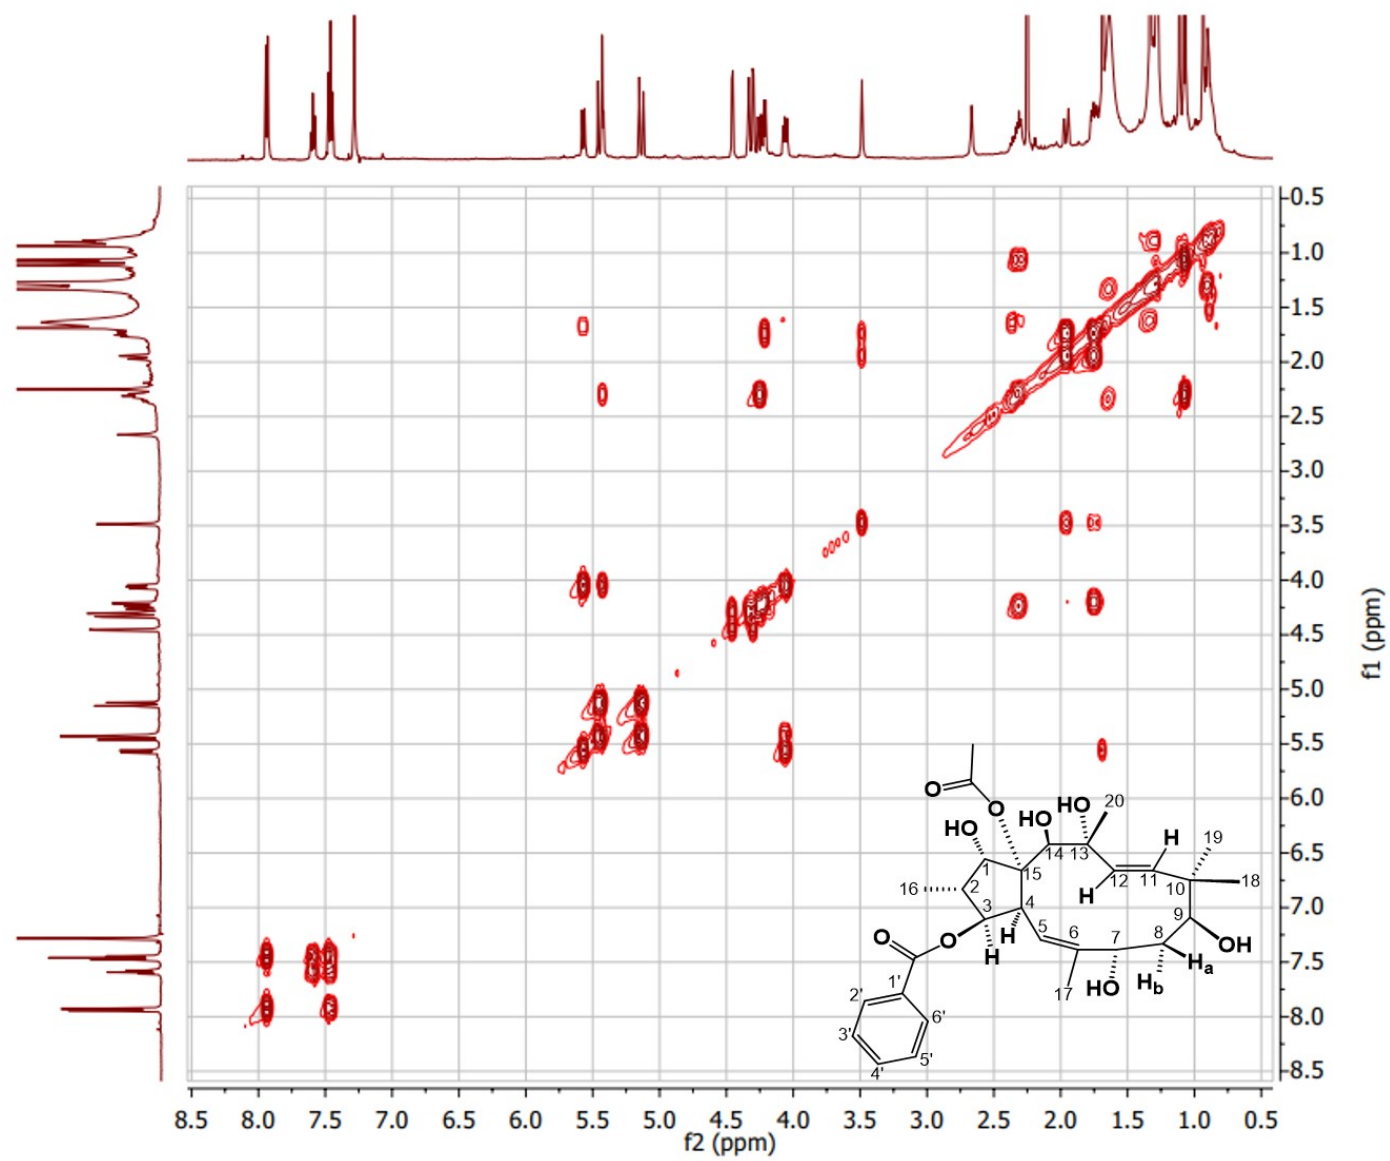

Figure S37. HSQC spectrum of compound **P4** (CDCl<sub>3</sub>)

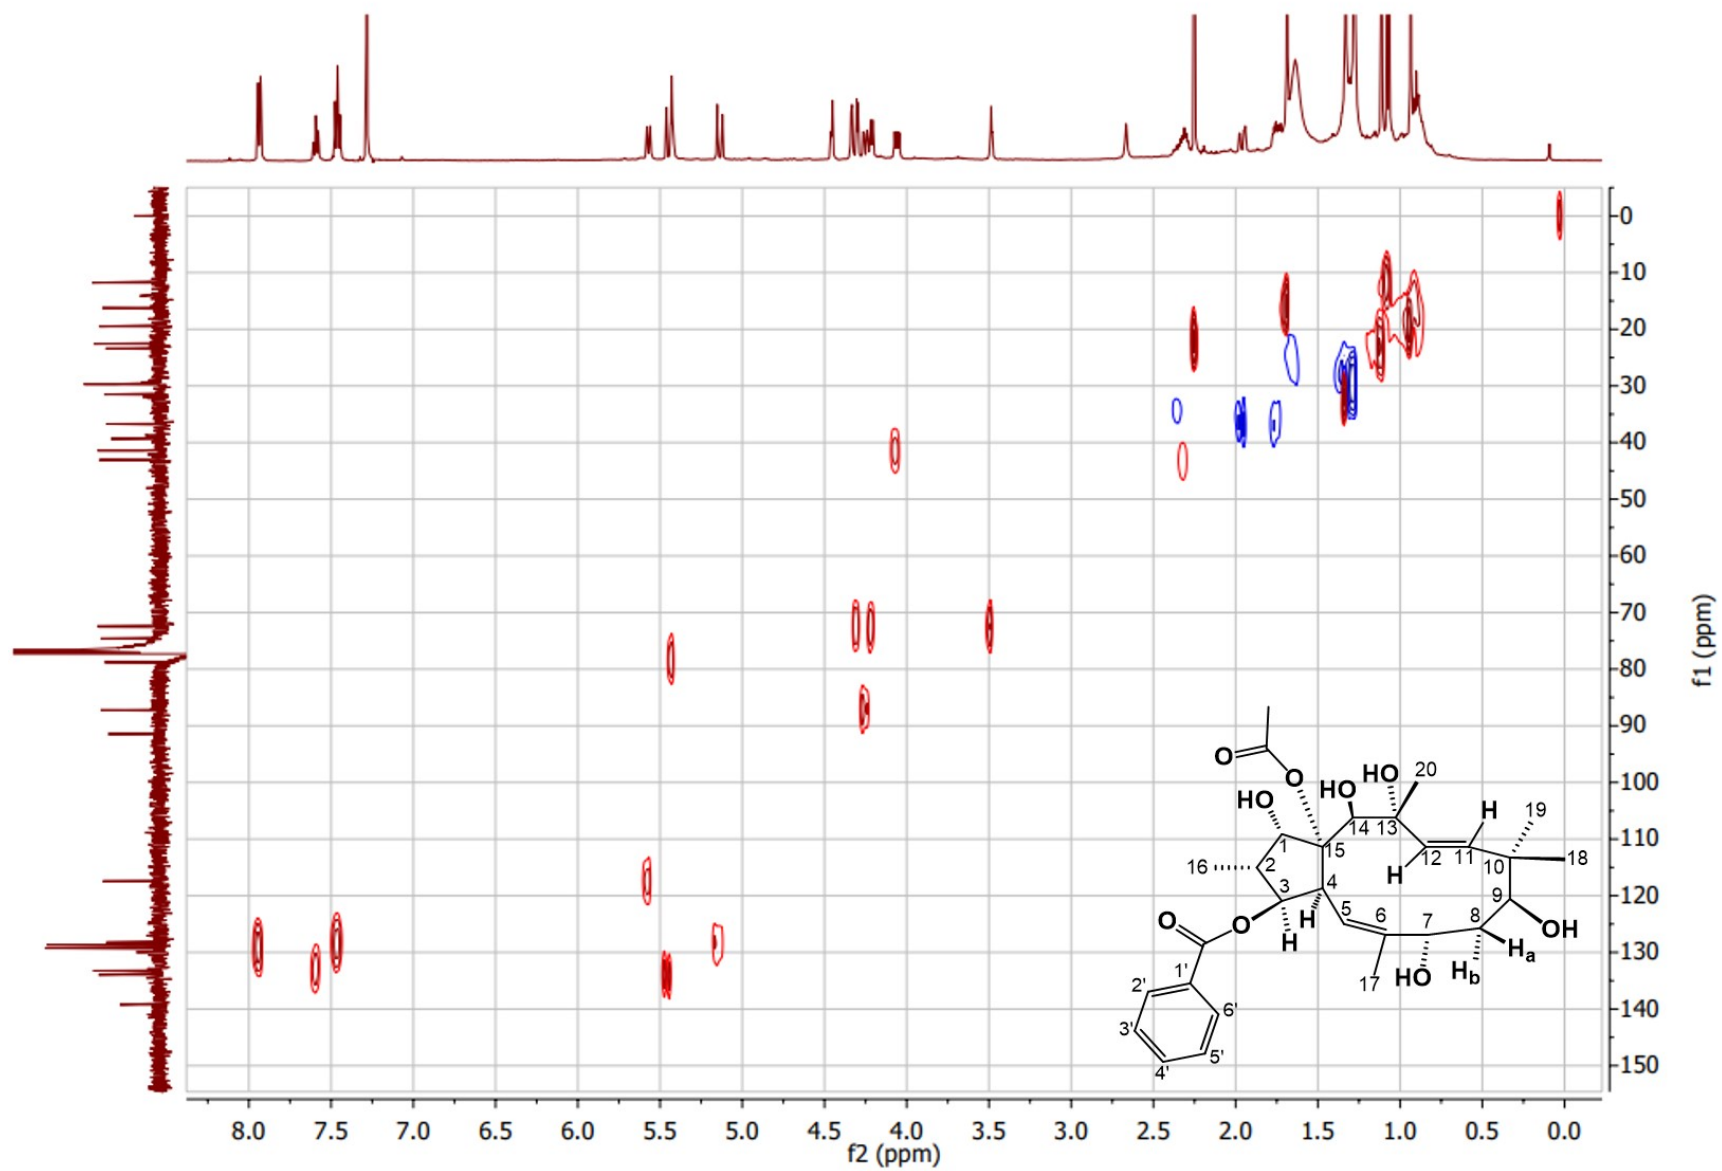

Figure S38. HMBC spectrum (total) of compound **P4** (CDCl<sub>3</sub>)

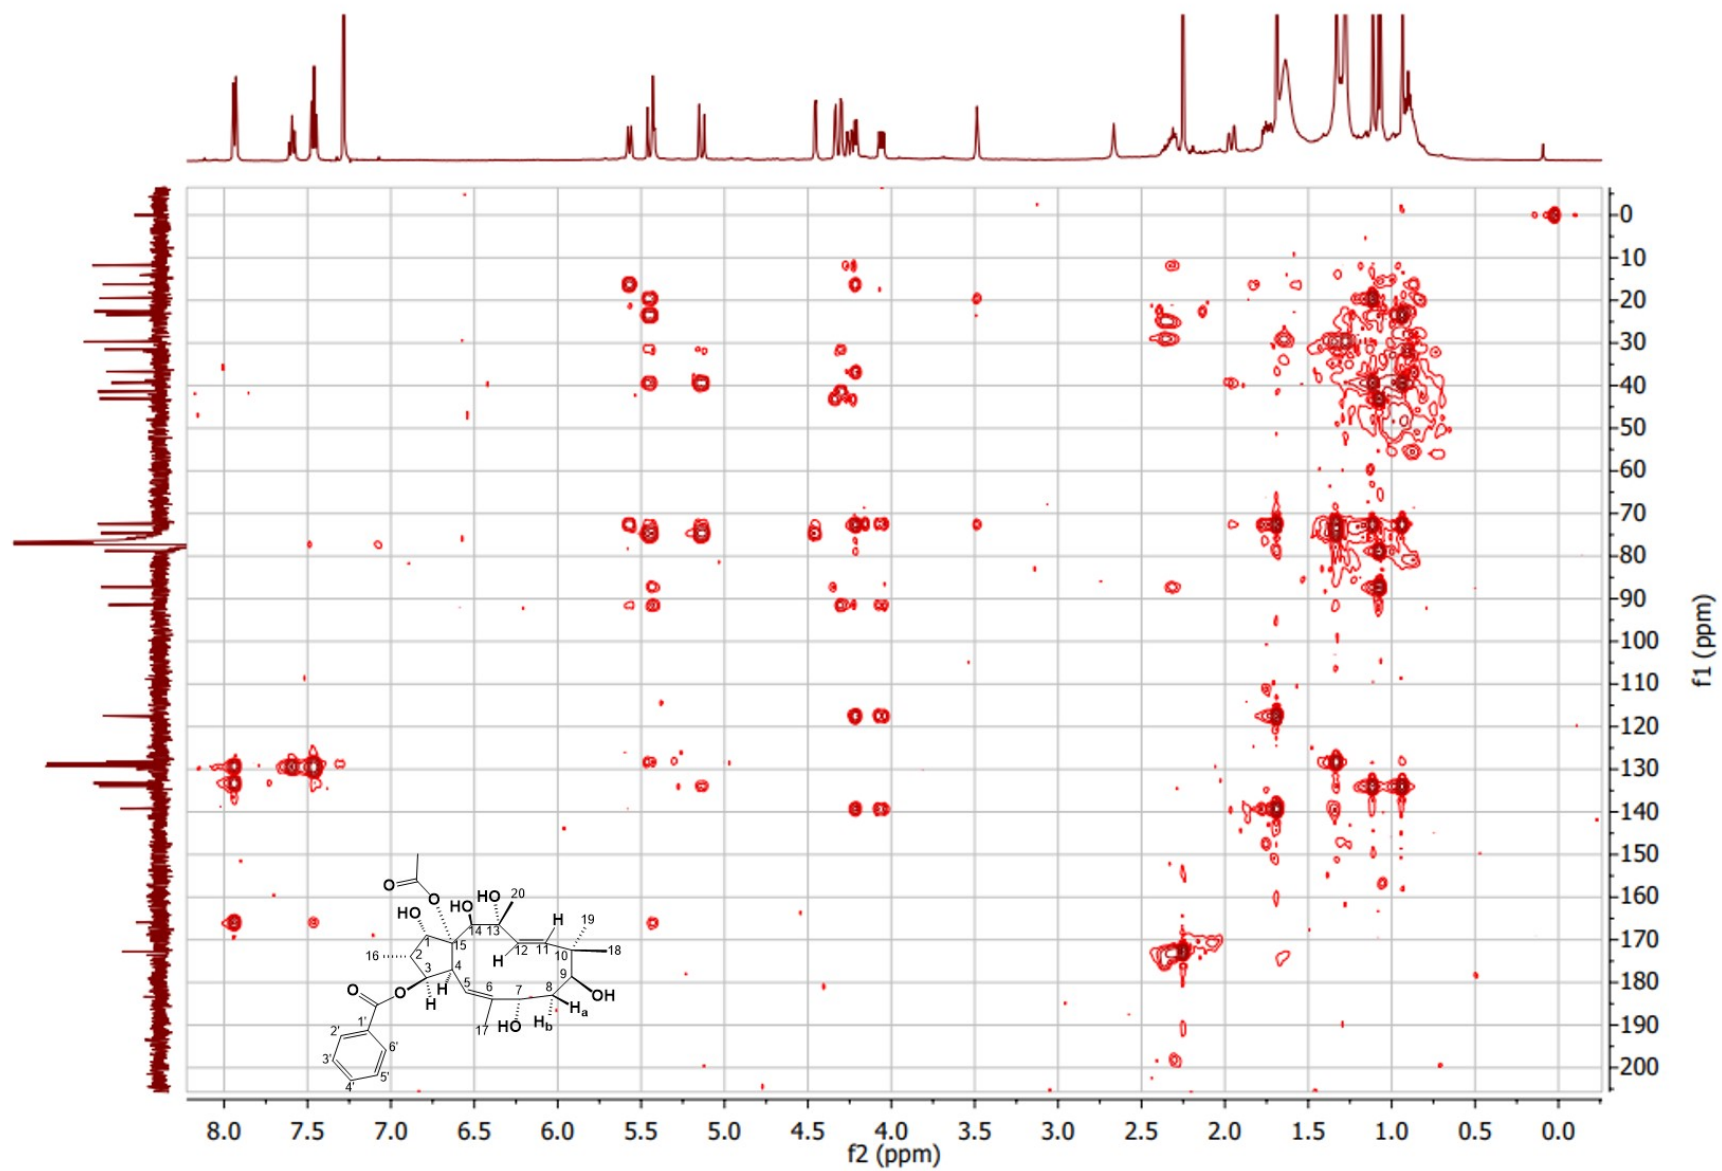

Figure S39. HMBC spectrum (sketched) of compound P4 (CDCl<sub>3</sub>)

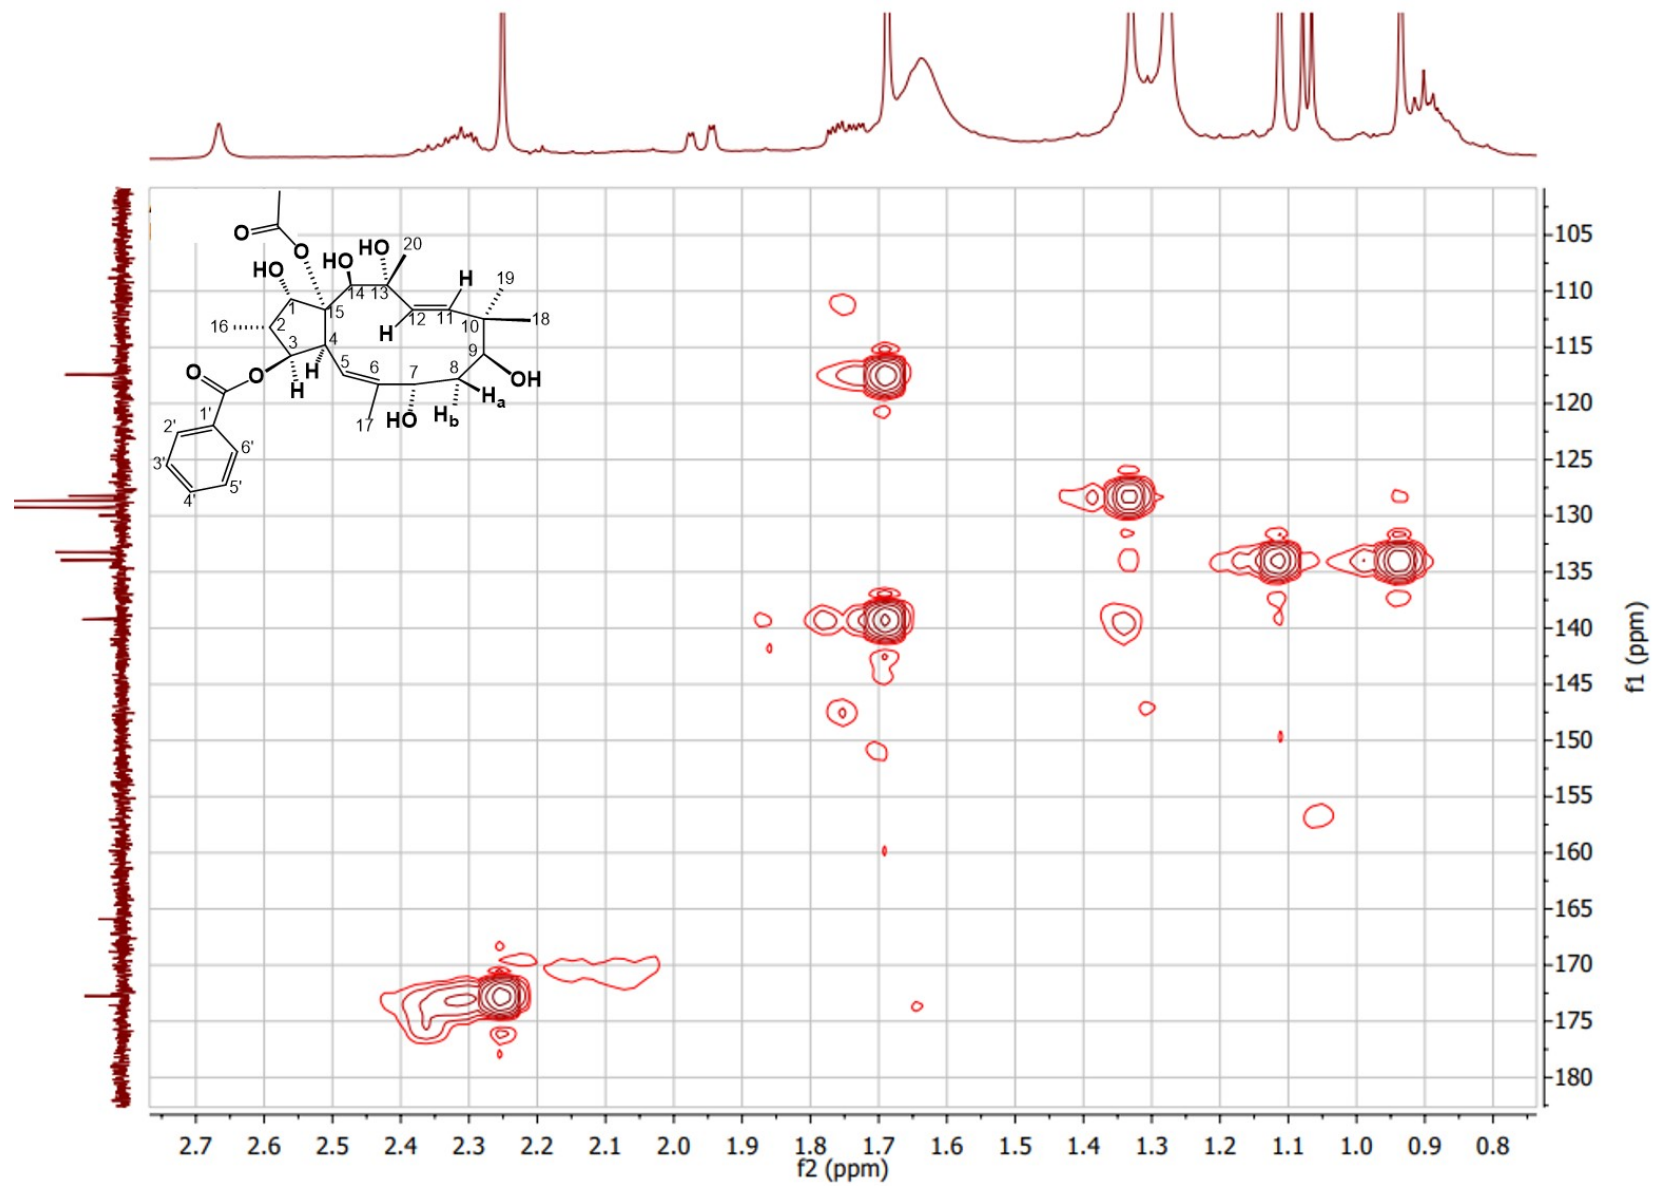



Figure S40. NOESY spectrum of compound **P4** (CDCl<sub>3</sub>)

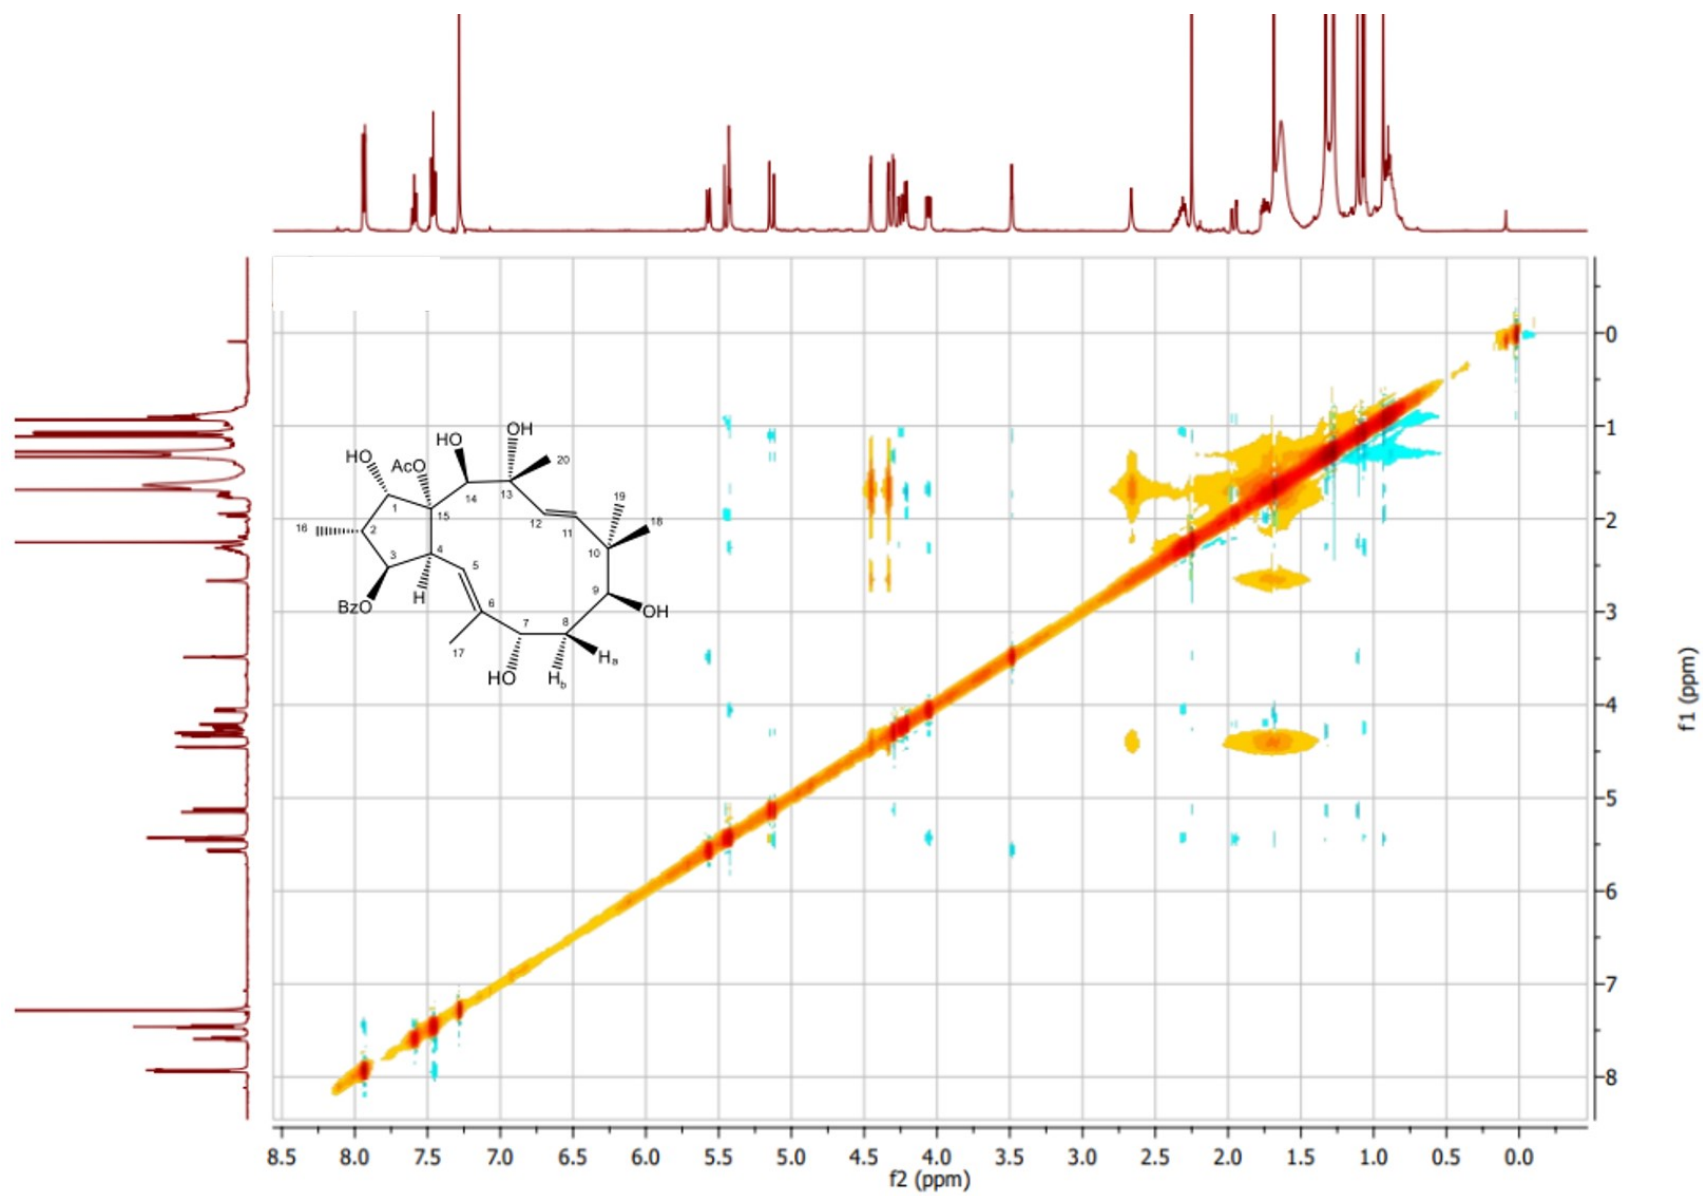

Figure S41. MS spectrum (CDCl<sub>3</sub>) and structural novelty check for compound P4

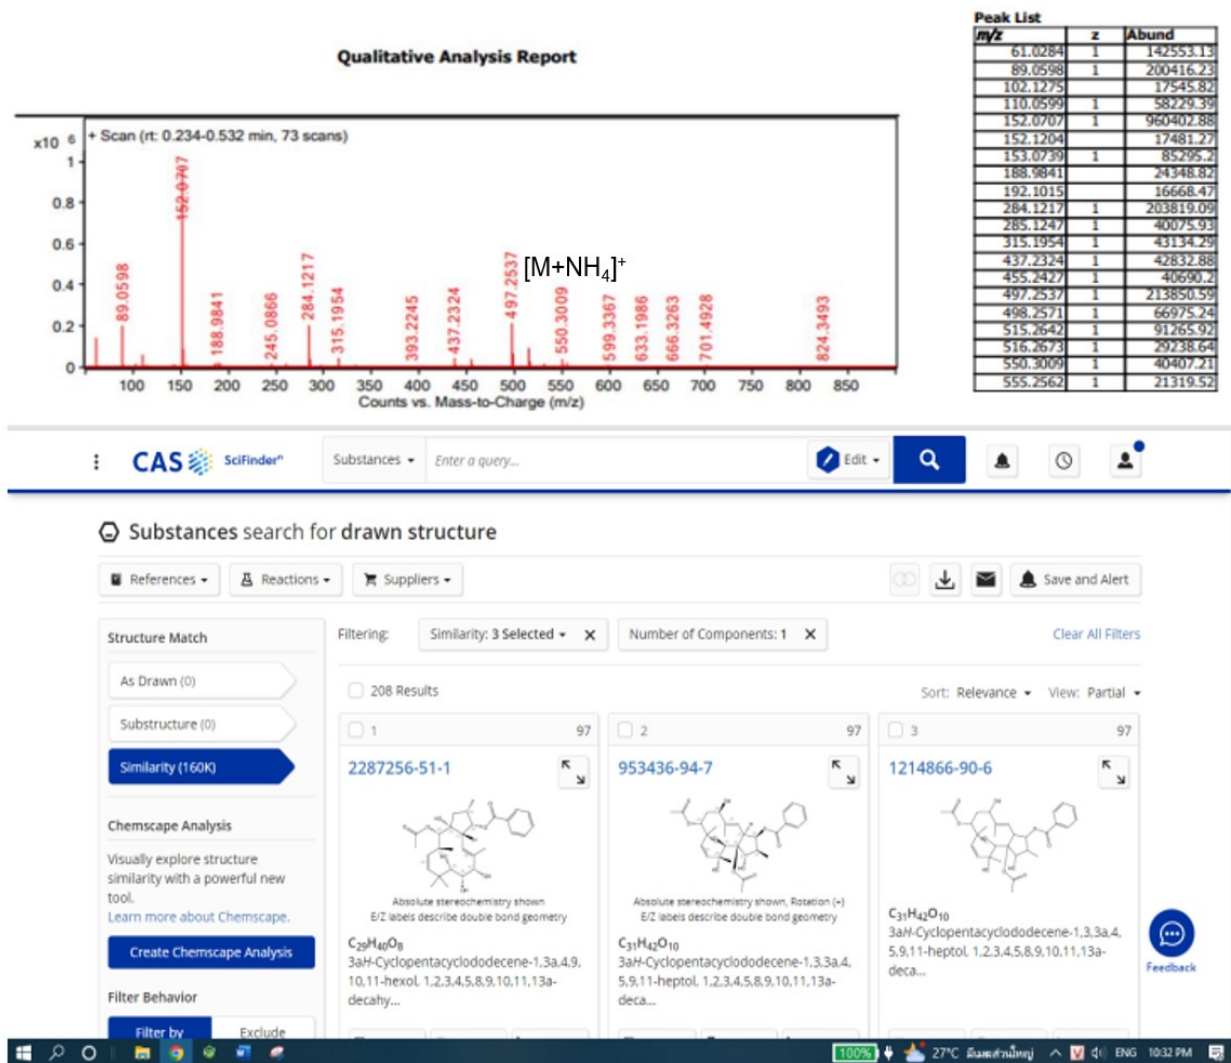

**Substances**  
10:31 PM

As Drawn (0)  
Substructure (0)  
Similarity (160K)

Figure S42. <sup>1</sup>H-NMR (600 MHz) spectrum of compound P5 (CDCl<sub>3</sub>)

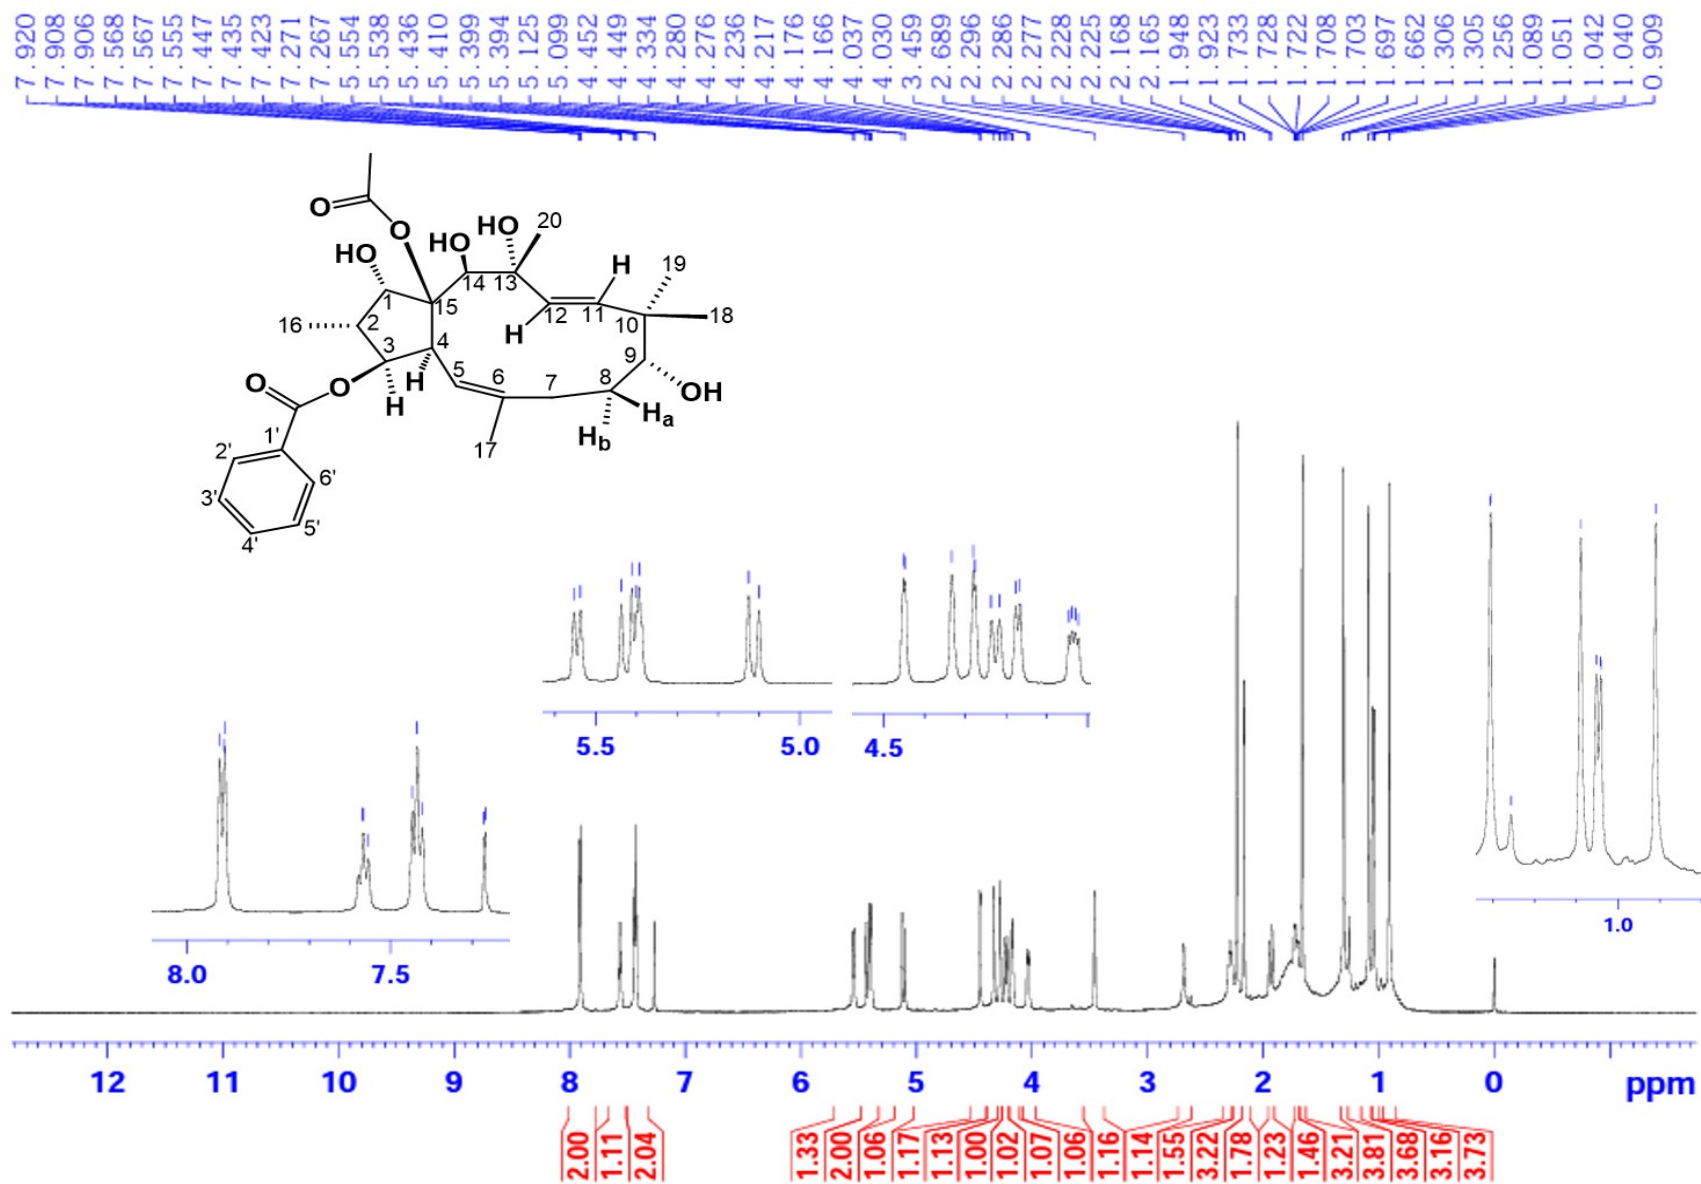

Figure S43.  $^{13}\text{C}$ -NMR (125 MHz) spectrum of compound **P5** ( $\text{CDCl}_3$ )

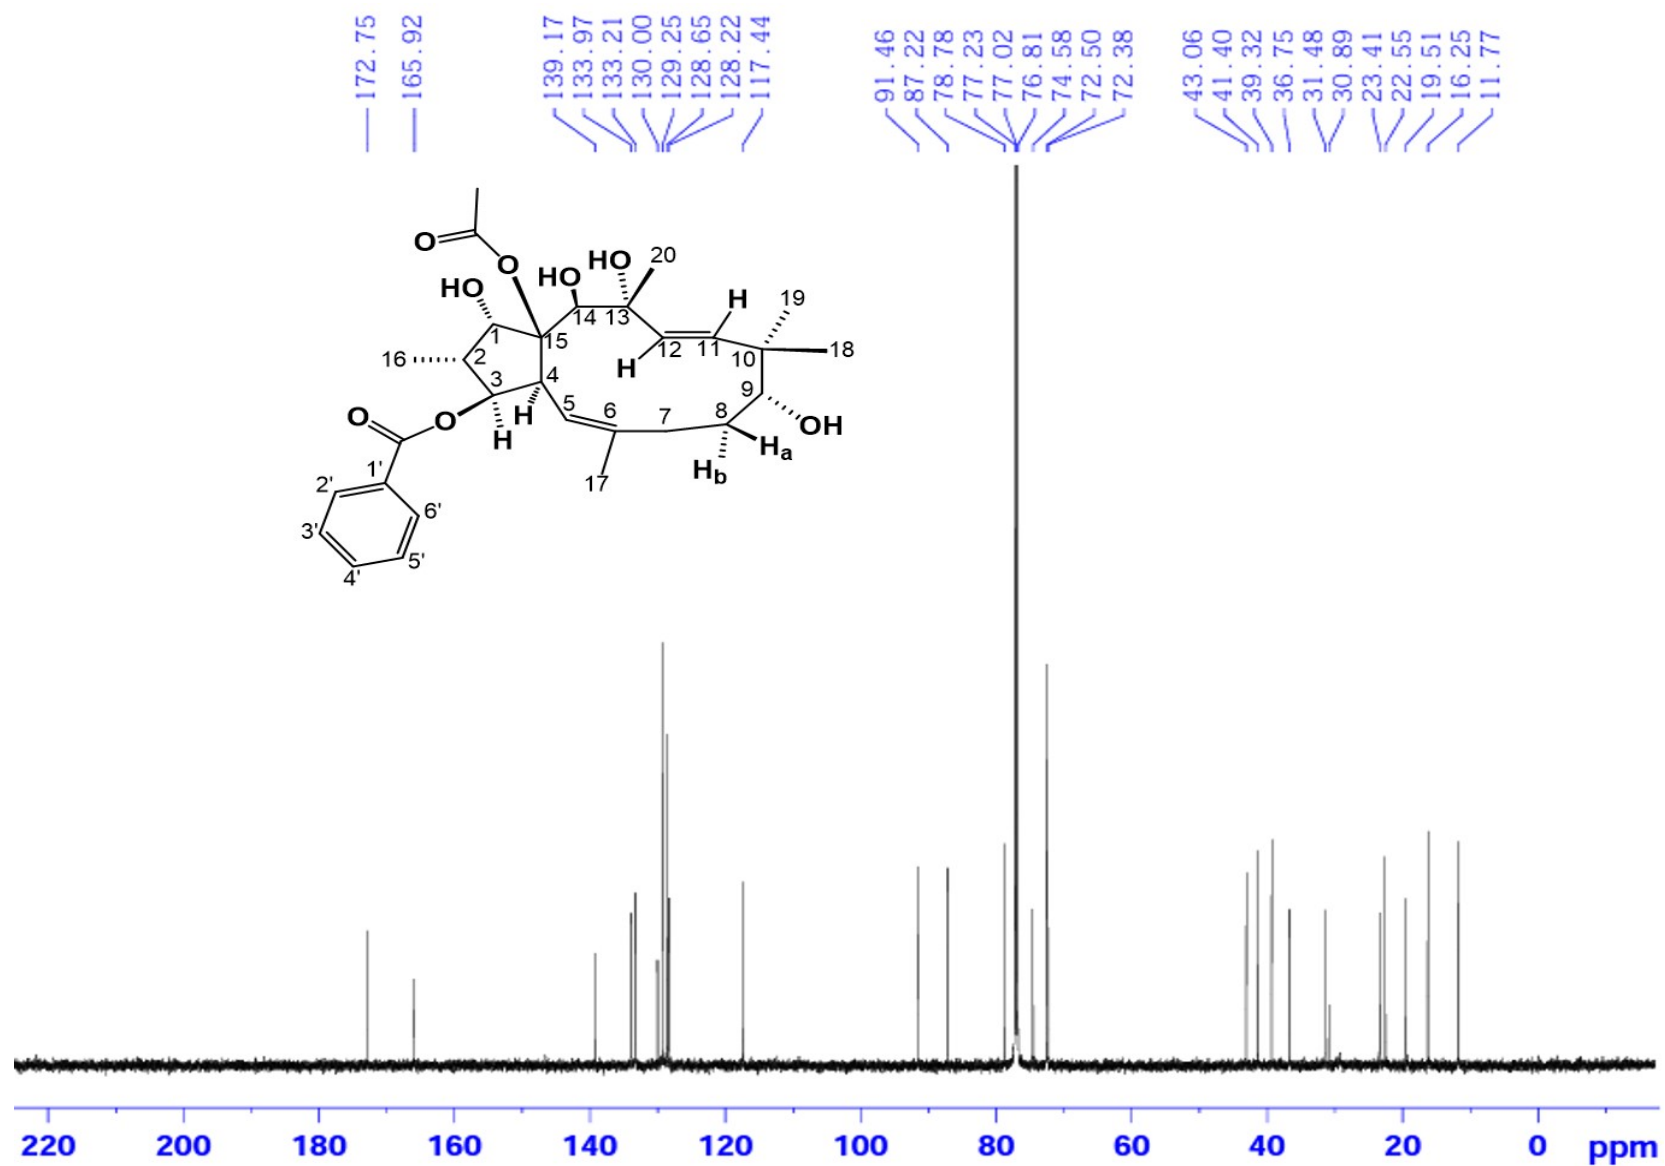

Figure S44. COSY spectrum of compound P5 (CDCl<sub>3</sub>)

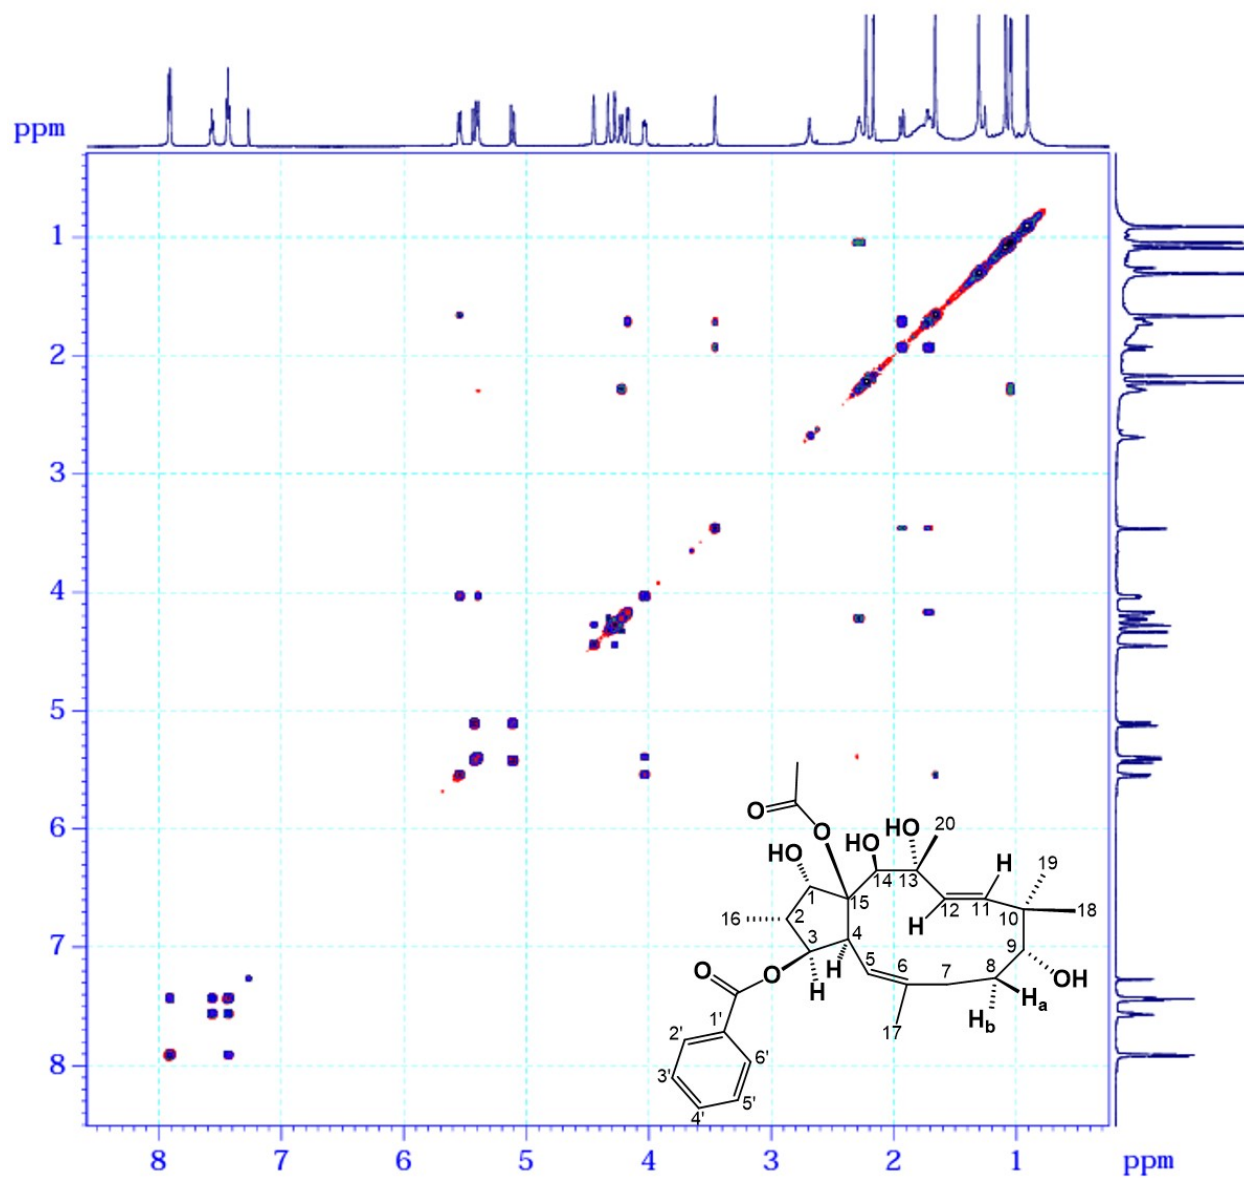

Figure S45. HSQC spectrum of compound P5 (CDCl<sub>3</sub>)

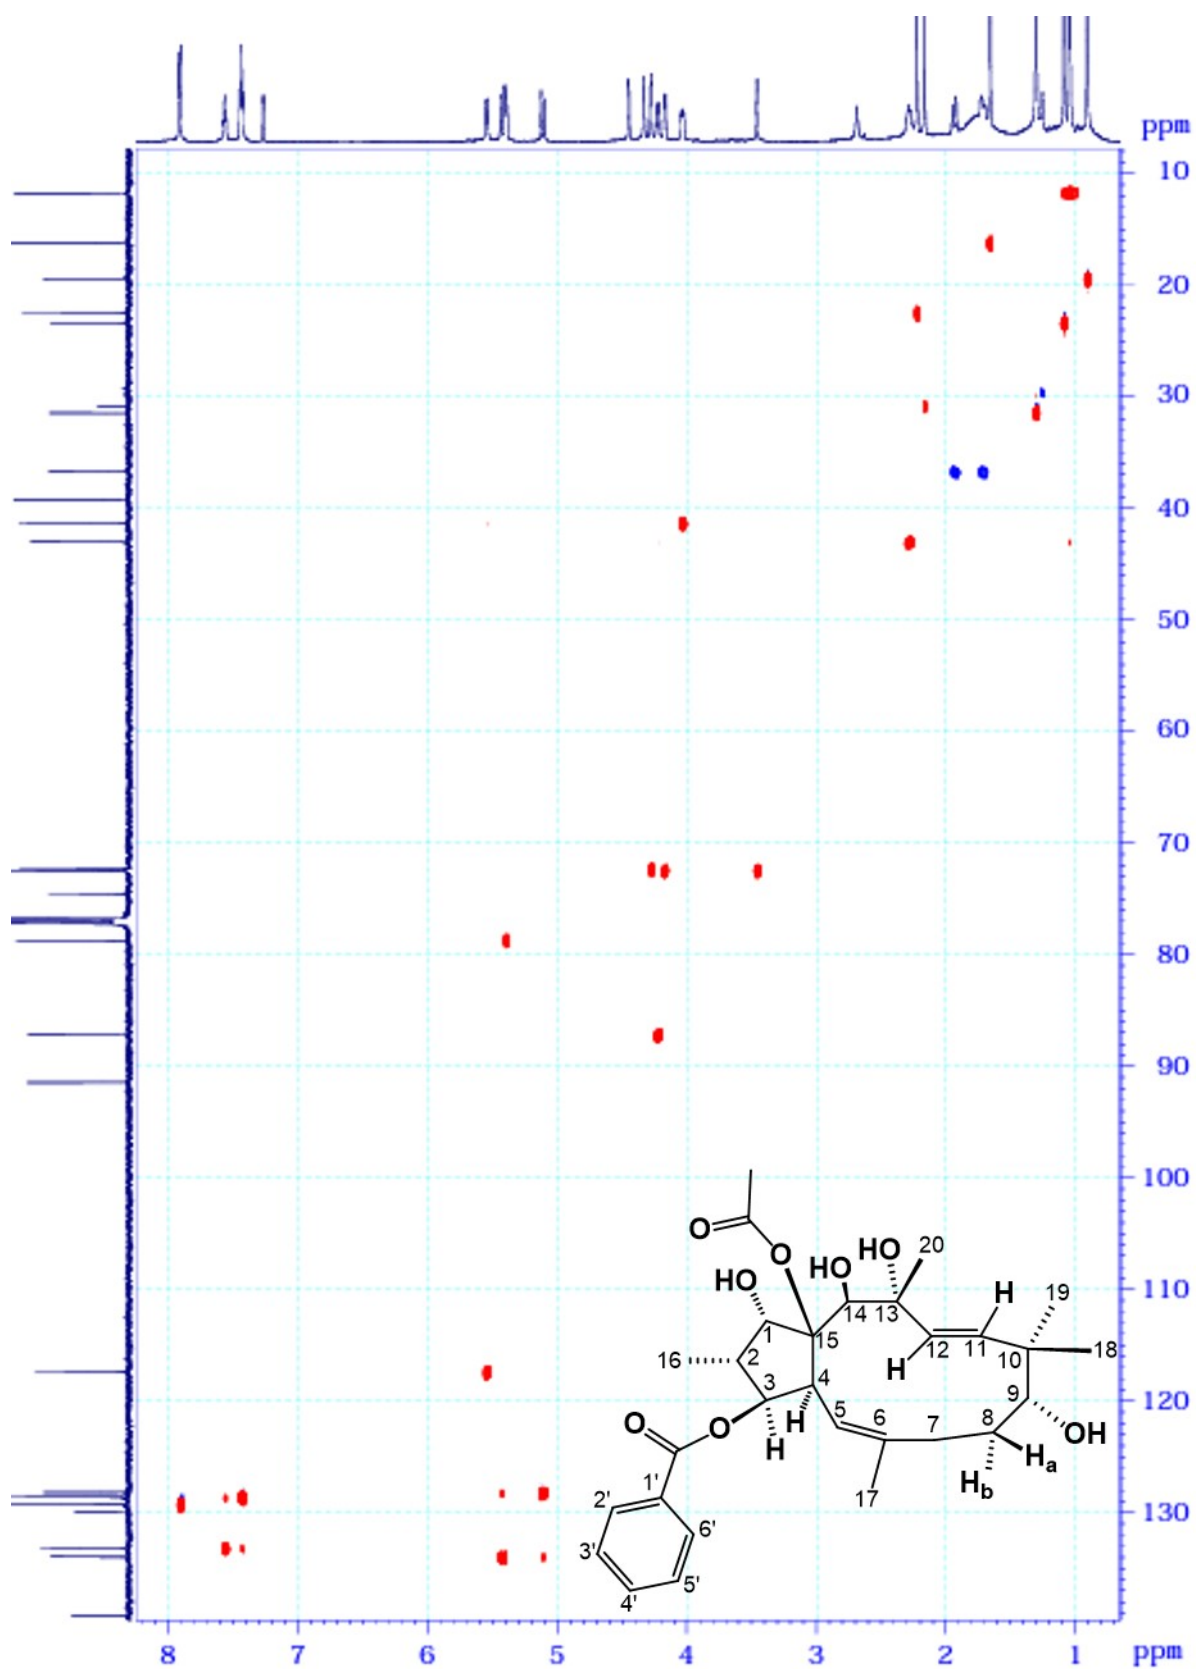

Figure S46. HMBC spectrum (total) of compound P5 (CDCl<sub>3</sub>)

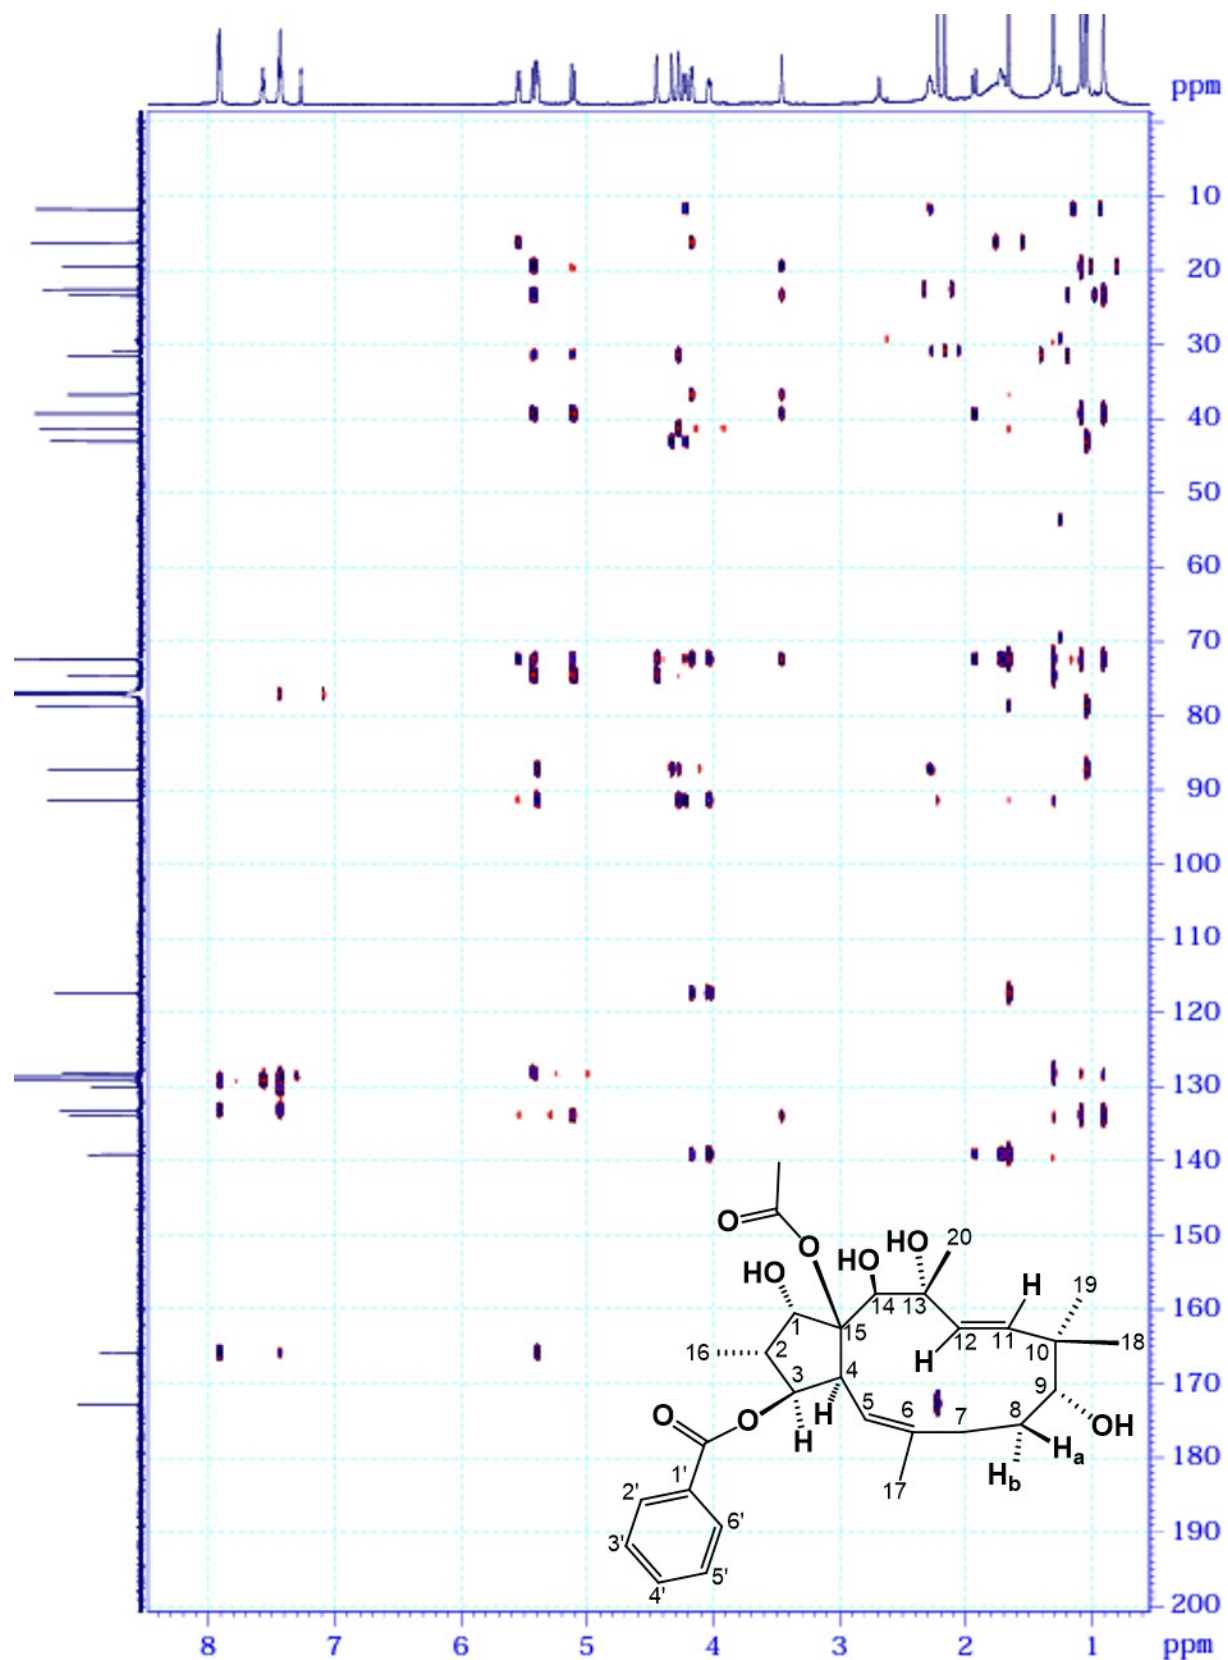

Figure S47. HMBC spectrum (sketched) of compound P5 (CDCl<sub>3</sub>)

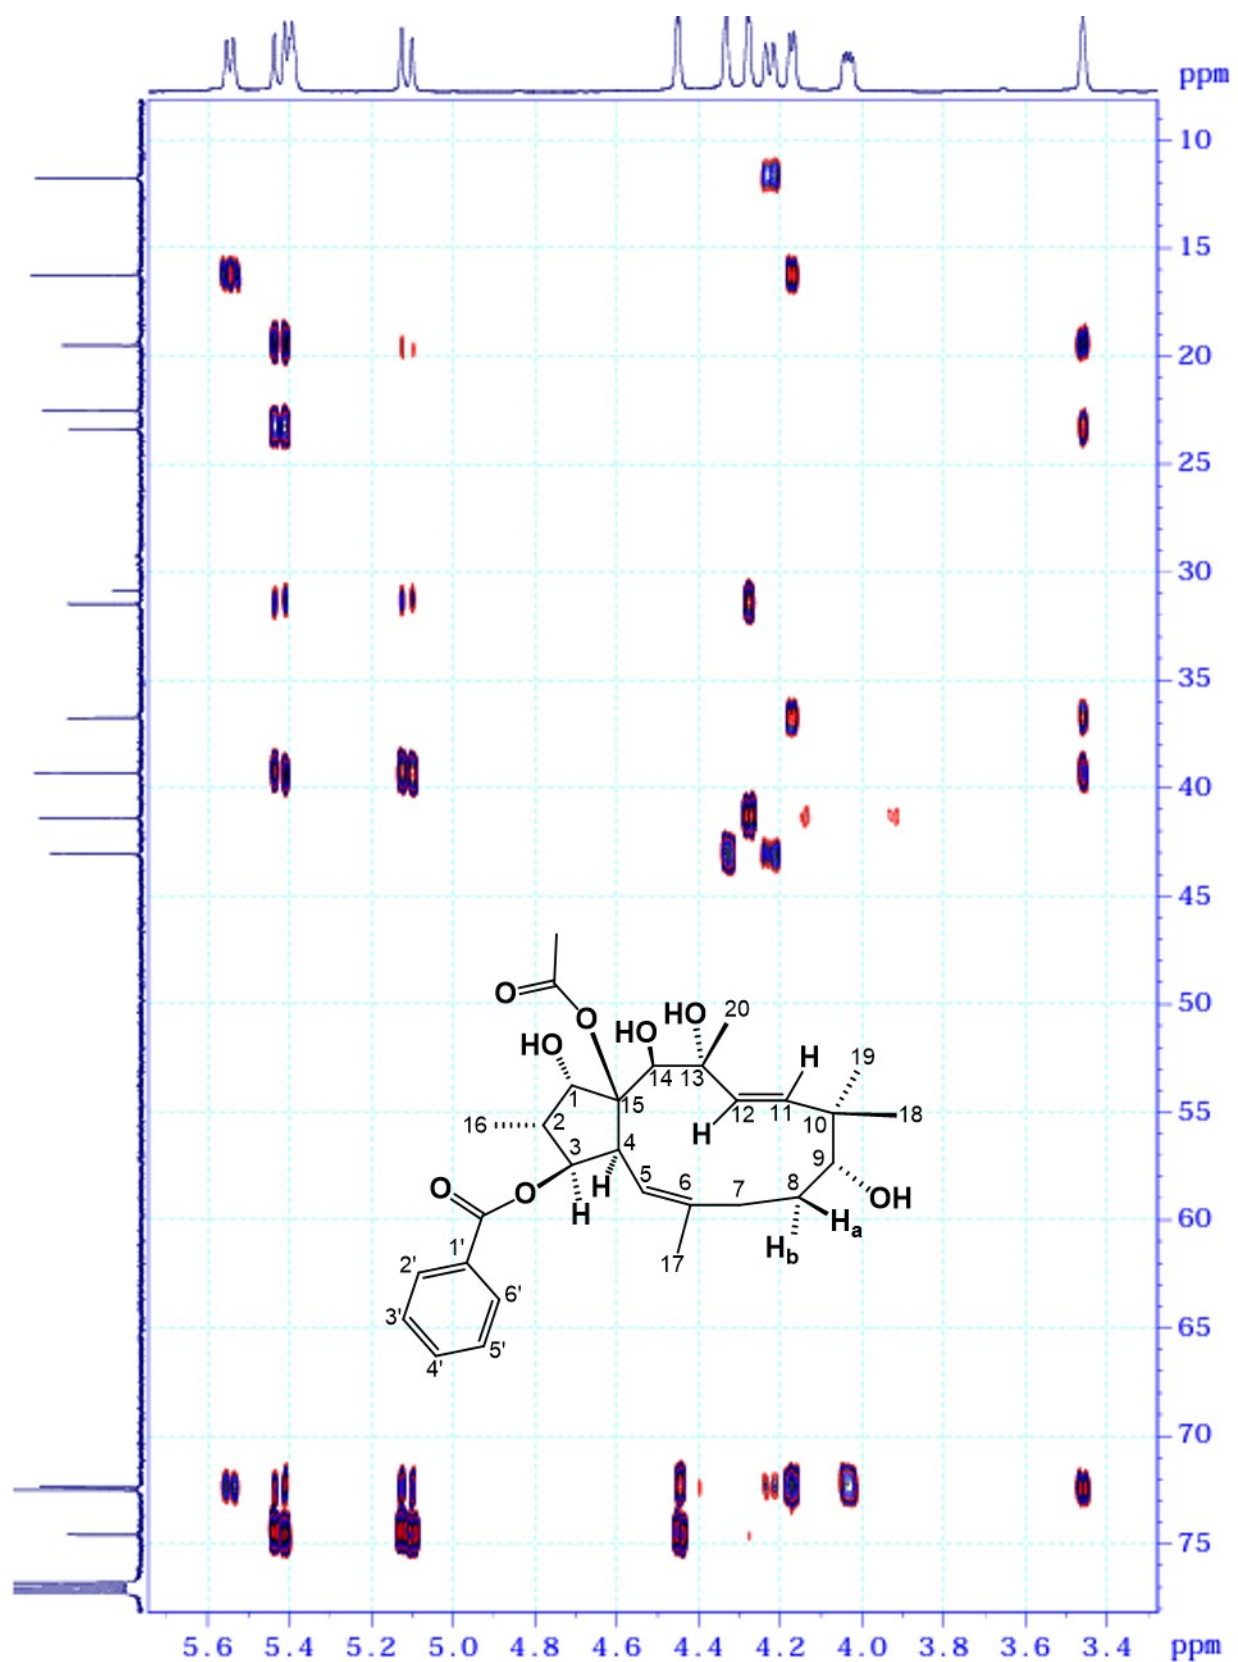



Figure S48. HMBC spectrum (sketched) of compound P5 (CDCl<sub>3</sub>)

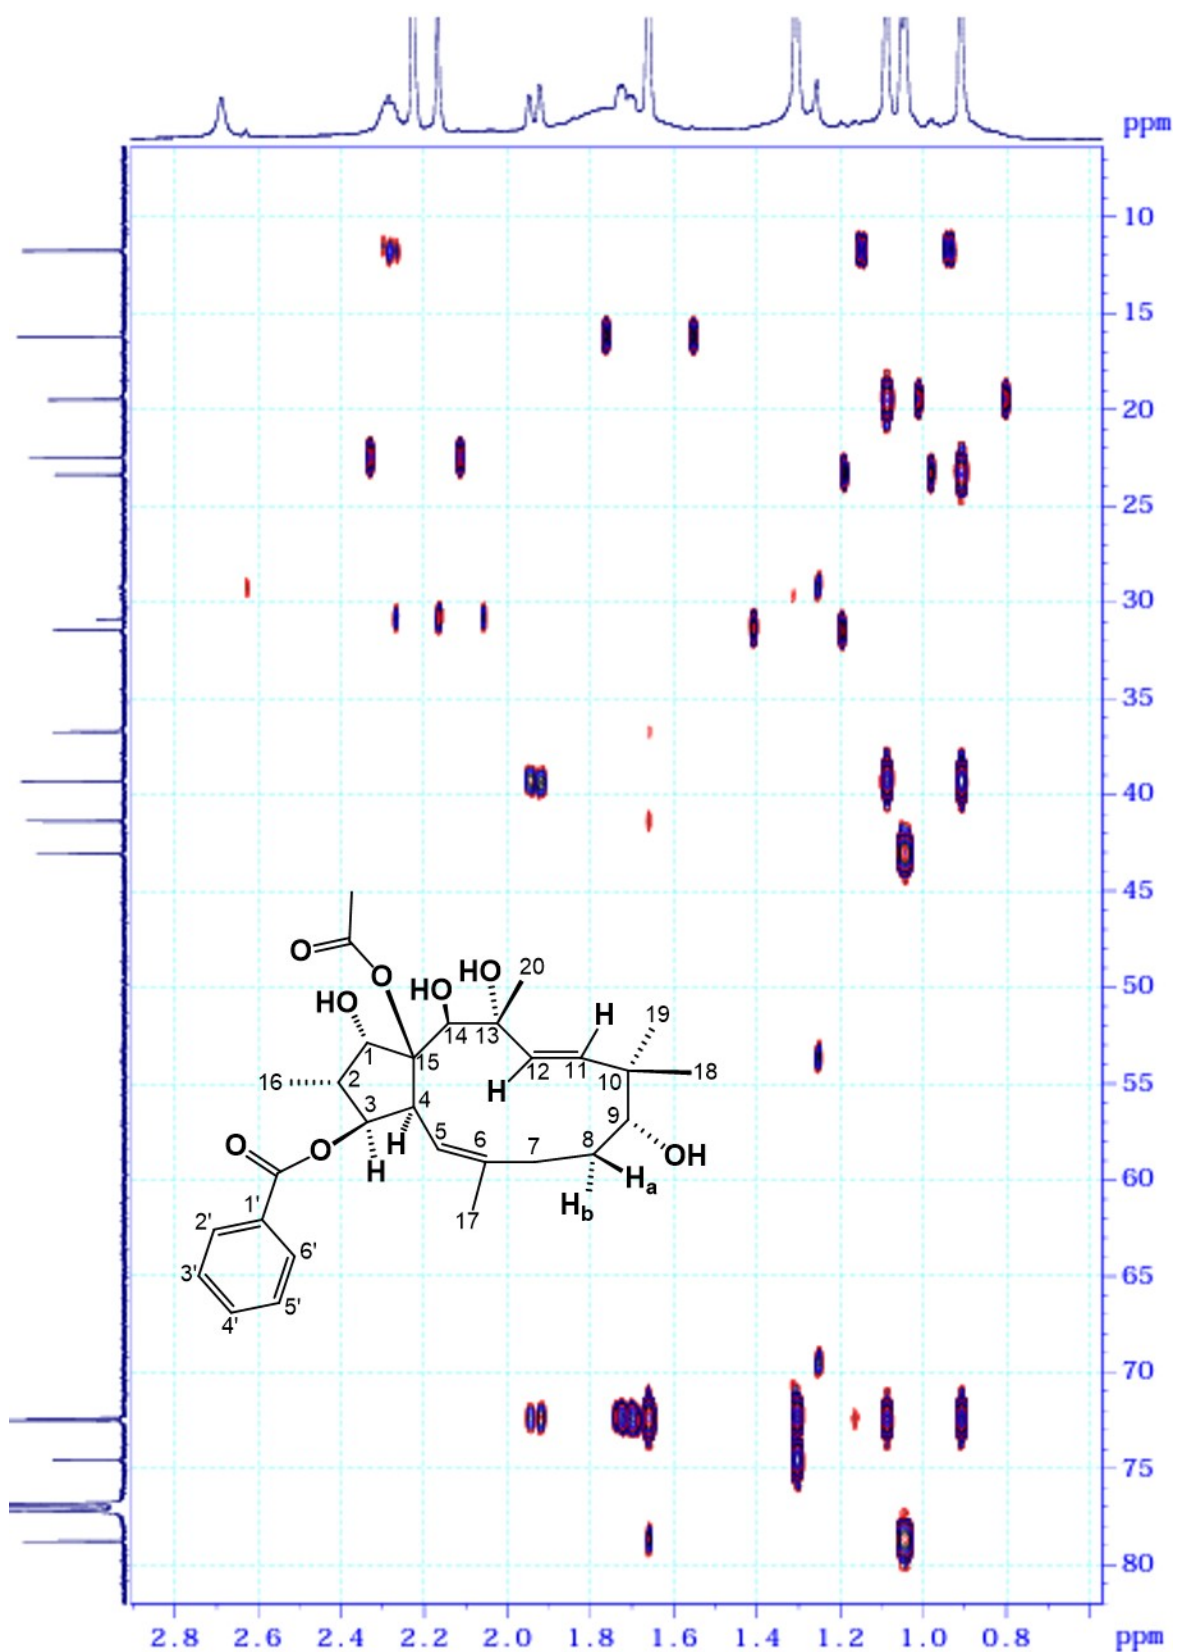

Figure S49. NOESY spectrum of compound P5 (CDCl<sub>3</sub>)

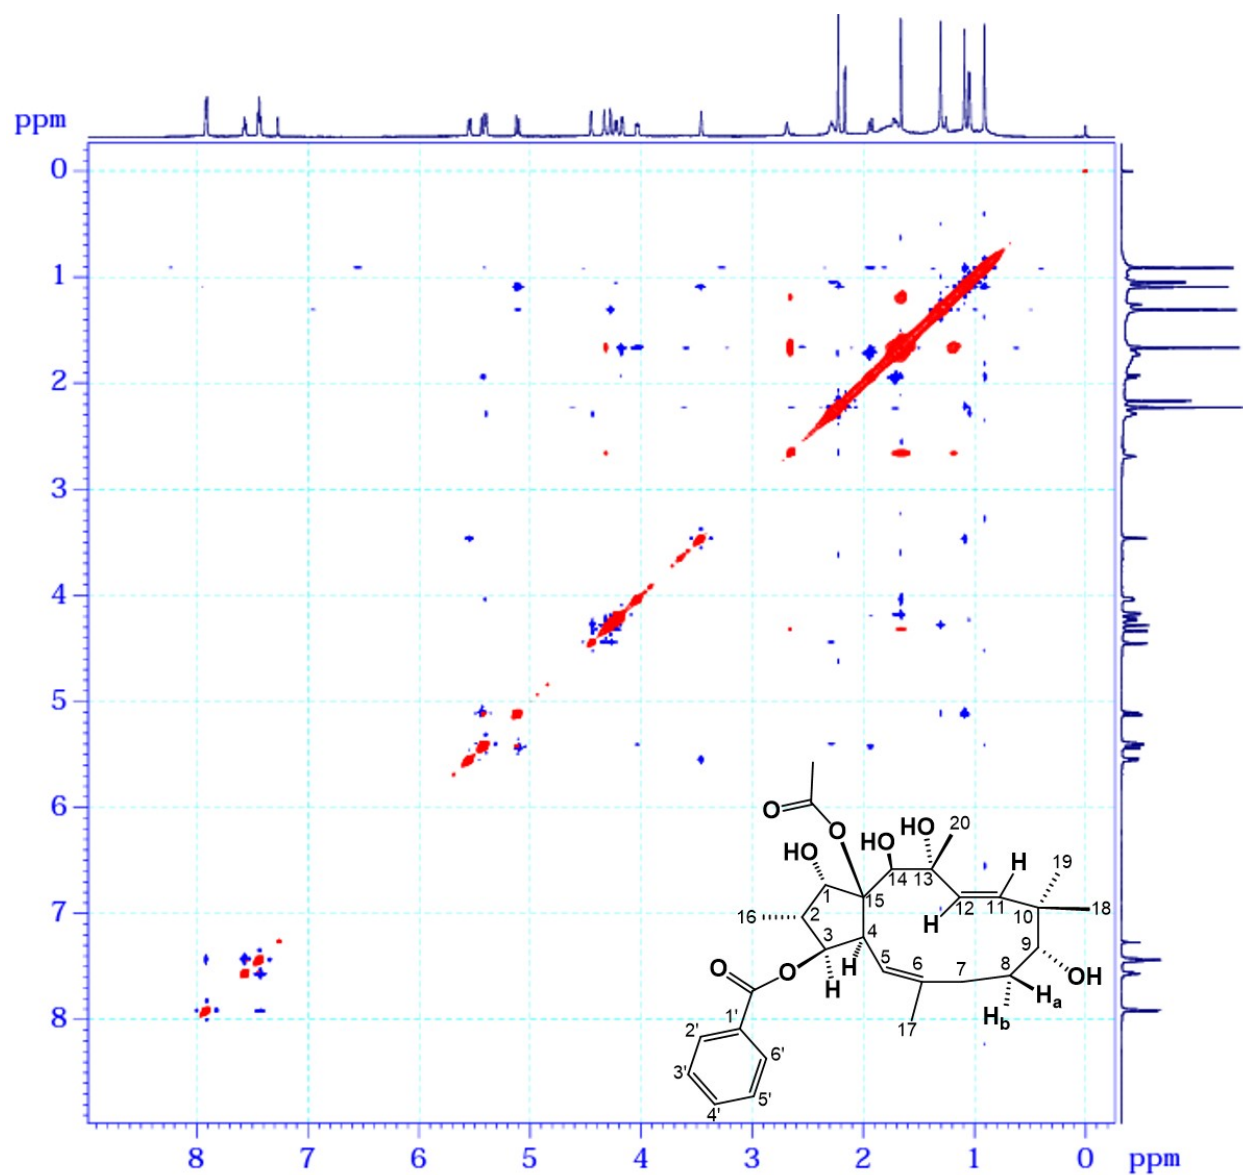

Figure S50. MS spectrum of compound P5 ( $\text{CDCl}_3$ )

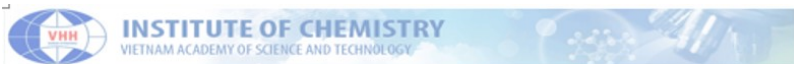

Sample name: P5117  
Operator: Hằng VHH  
Method: +IDA TOF MS/MS  
Date: 2022.10.13

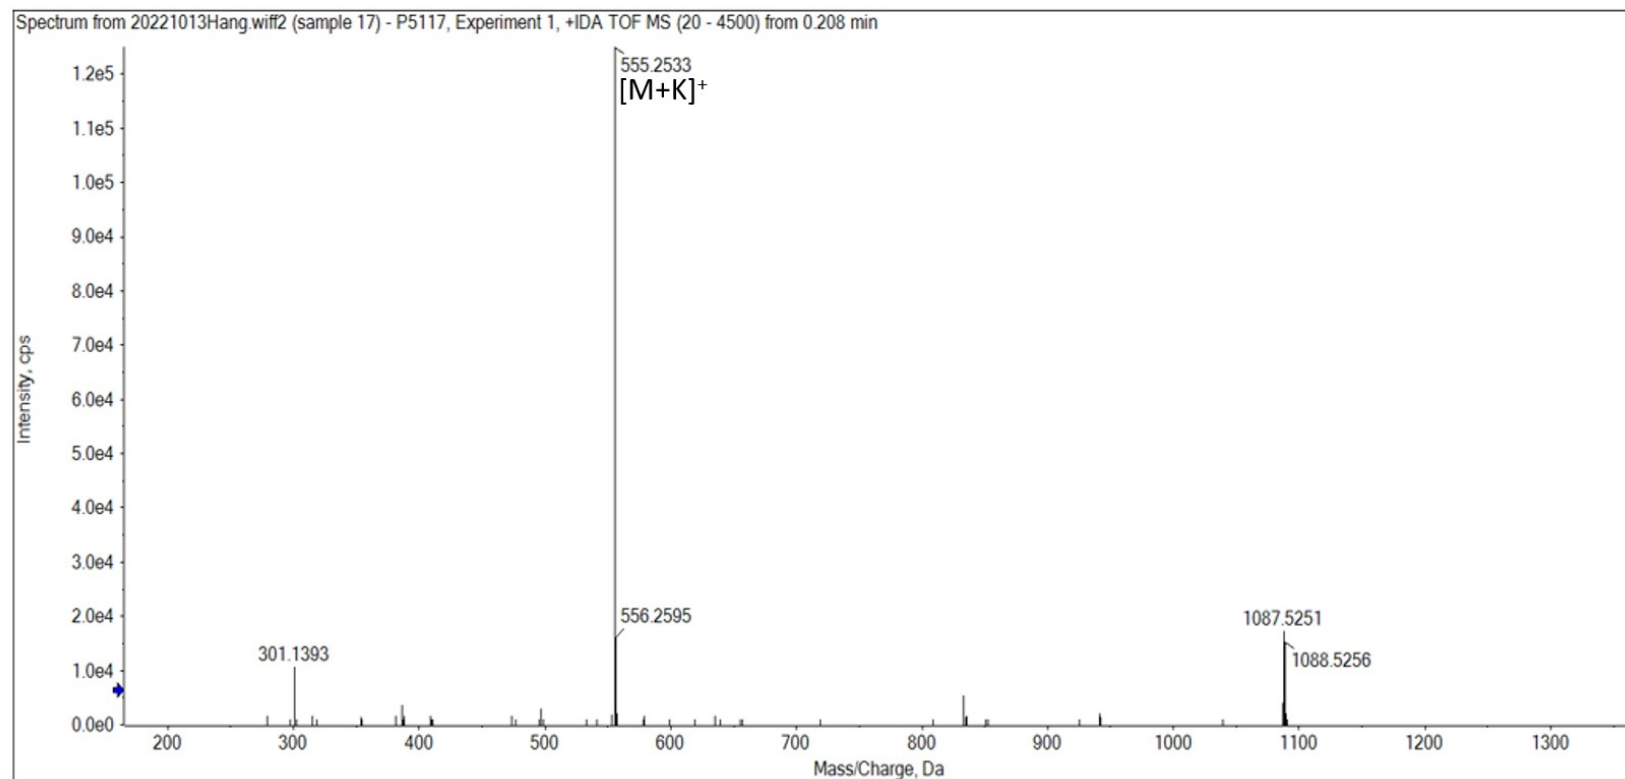

Figure S51. Structural novelty check for compound P5

Substances search for drawn structure

References Reactions Suppliers

Structure Match: As Drawn (0), Substructure (0), Similarity (160K)

Chemscape Analysis: Visually explore structure similarity with a powerful new tool. Learn more about Chemscape. Create Chemscape Analysis

Filter Behavior: Filter by Exclude

Filtering: Similarity: 3 Selected, Number of Components: 1

181 Results

Sort: Relevance, View: Partial

| Result ID    | Chemical Structure | Description                                                                           |
|--------------|--------------------|---------------------------------------------------------------------------------------|
| 2287256-51-1 |                    | Absolute stereochemistry shown, E/Z labels describe double bond geometry              |
| 1946844-10-5 |                    | Absolute stereochemistry shown, Rotation (i) E/Z labels describe double bond geometry |
| 1016572-85-2 |                    | Absolute stereochemistry shown, Rotation (i) E/Z labels describe double bond geometry |

November 15, 2022

Substances 10:25 PM

As Drawn (0)  
Substructure (0)  
Similarity (160K)

Rerun Search

Edit Search
