# Supplementary material for: Cytotoxicity, anti-diabeticity, and phytocomposition investigation of Vietnamese Euphorbia tithymaloides Linn. (Euphorbiaceae)
Source: Royal Society of Chemistry journal article supplement (doi:10.1039/d3ra05637f), 2023-01-01
Supplement: d3ra05637f2.pdf [file d3ra05637f2.pdf]

## SUPPLEMENTARY INFORMATION

### Cytotoxicity, Anti-diabeticity, and Phytochemical Investigation of Vietnamese *Euphorbia tithymaloides* Linn. (Euphorbiaceae)

Nguyen Vu Duy Khang,<sup>a,b</sup> Dinh Thi Hong Dao,<sup>a,b</sup> Nguyen Thi Thanh Mai,<sup>a,b,c</sup> Tran Le Quan,<sup>a,b</sup> and Nguyen Thi Y Nhi<sup>\*a,b</sup>

<sup>a</sup> Faculty of Chemistry, University of Science – Ho Chi Minh City – Vietnam, 227 Nguyen Van Cu Street, Ward 4, District 5, 70000 Ho Chi Minh City, Vietnam.

<sup>b</sup> Vietnam National University, Ho Chi Minh City, Vo Truong Toan Street, Linh Trung District, Thu Duc City, 70000 Ho Chi Minh City, Vietnam.

<sup>c</sup> Research Lab for Drug Discovery and Development, University of Science – Ho Chi Minh City – Vietnam, 227 Nguyen Van Cu Street, Ward 4, District 5, 70000 Ho Chi Minh City, Vietnam.

\* Corresponding author

Nguyen Thi Y Nhi, Faculty of Chemistry, University of Science – Ho Chi Minh City – Vietnam, 227 Nguyen Van Cu Street, Ward 4, District 5, 70000 Ho Chi Minh City, Vietnam

Tel.: +84 902 41 2668

E-mail address: nty nhi@hcmus.edu.vn

#### TABLE OF CONTENTS:

|                                                                                                                                                                                                          |         |
|----------------------------------------------------------------------------------------------------------------------------------------------------------------------------------------------------------|---------|
| <b>Figure S1–S8.</b> <sup>1</sup> H-NMR, <sup>13</sup> C-NMR, COSY, HSQC, HMBC (total & sketched), NOESY, and MS spectra of compound <b>P1</b> (in Acetone- <i>d</i> <sub>6</sub> )                      | S2–S9   |
| <b>Figure S9–S19.</b> <sup>1</sup> H-NMR, <sup>13</sup> C-NMR (total & sketched), COSY, HSQC, HMBC, NOESY, MS spectra (in CDCl <sub>3</sub> ), and structural novelty check for compound <b>P2</b>       | S10–S20 |
| <b>Figure S20–S33.</b> <sup>1</sup> H-NMR, <sup>13</sup> C-NMR (total & sketched), COSY, HSQC, HMBC, NOESY (total & sketched), and MS spectra of compound <b>P3</b> (in Acetone- <i>d</i> <sub>6</sub> ) | S21–S34 |
| <b>Figure S34–S41.</b> <sup>1</sup> H-NMR, <sup>13</sup> C-NMR, COSY, HSQC, HMBC (total & sketched), NOESY, MS spectra (in CDCl <sub>3</sub> ), and structural novelty check for compound <b>P4</b>      | S35–S42 |
| <b>Figure S42–S51.</b> <sup>1</sup> H-NMR, <sup>13</sup> C-NMR, COSY, HSQC, HMBC (total & sketched), NOESY, MS spectra (in CDCl <sub>3</sub> ), and structural novelty check for compound <b>P5</b>      | S43–S52 |

Figure S1.  $^1\text{H-NMR}$  (600 MHz, Acetone- $d_6$ ) spectrum of compound P1

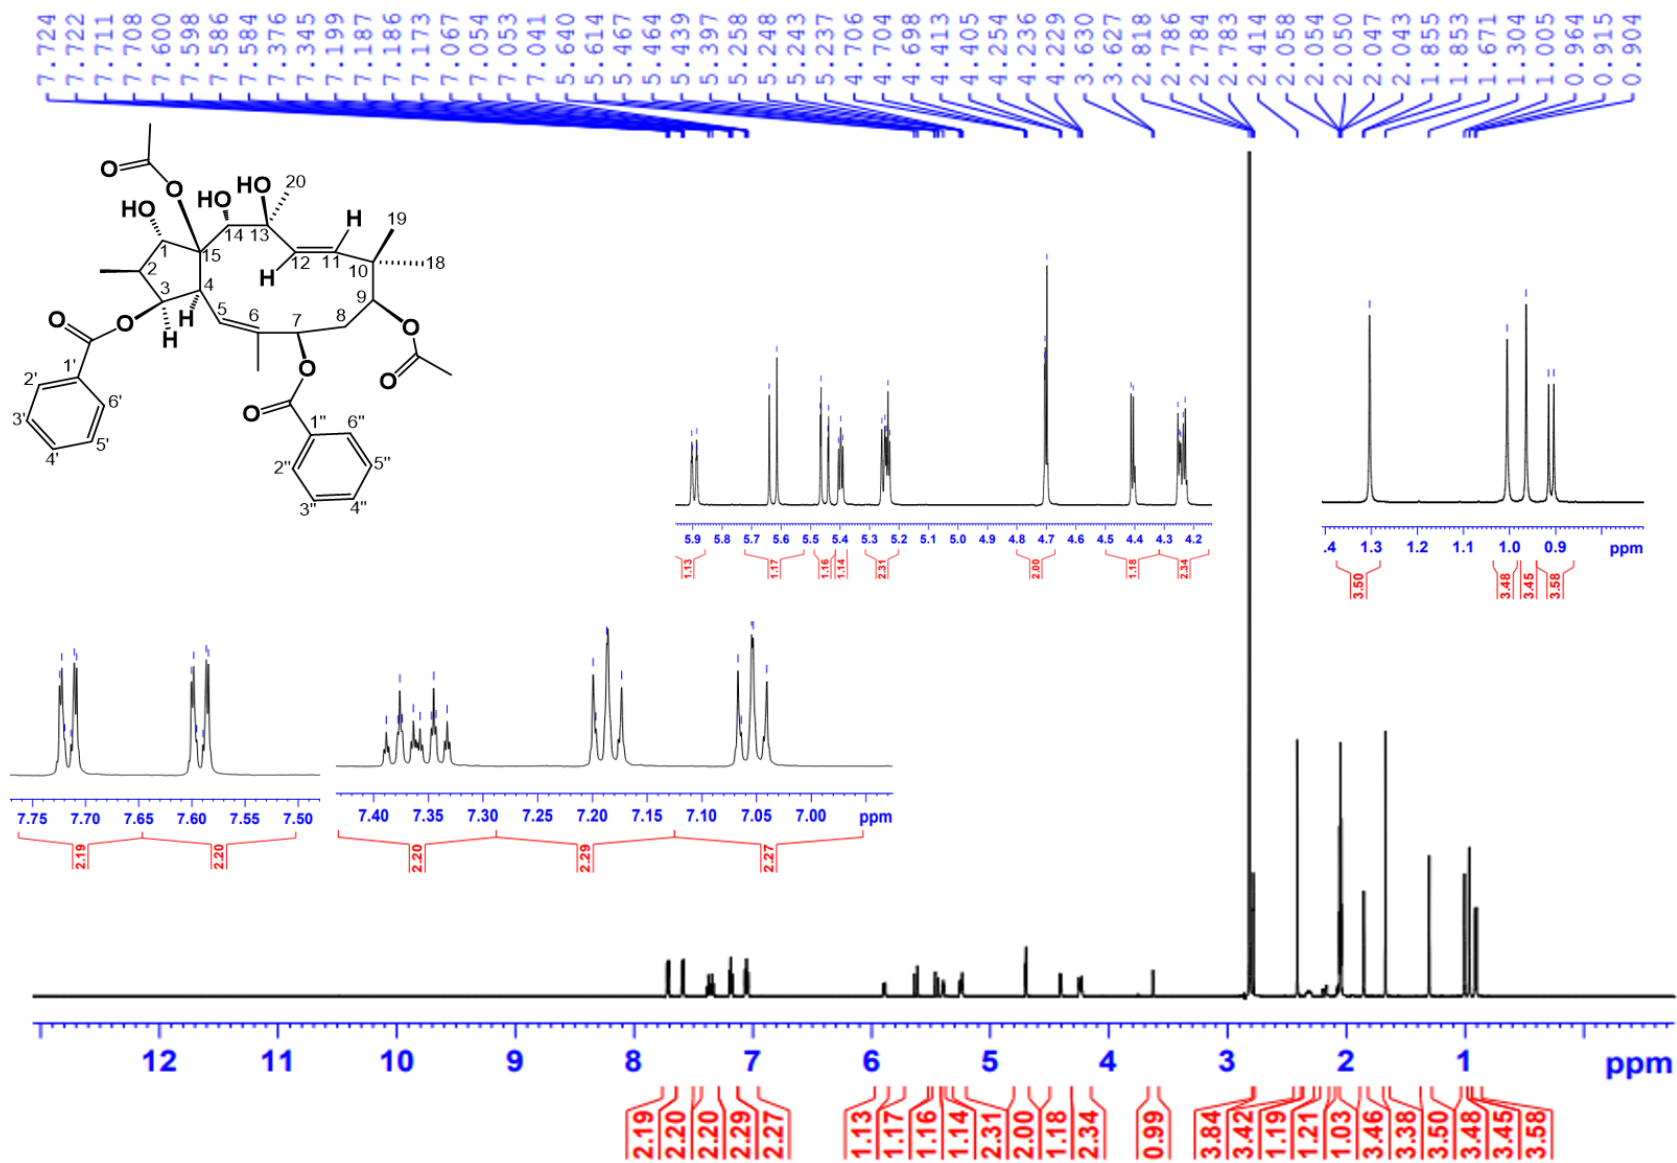

Figure S2.  $^{13}\text{C}$ -NMR (125 MHz, Acetone- $d_6$ ) spectrum of compound P1

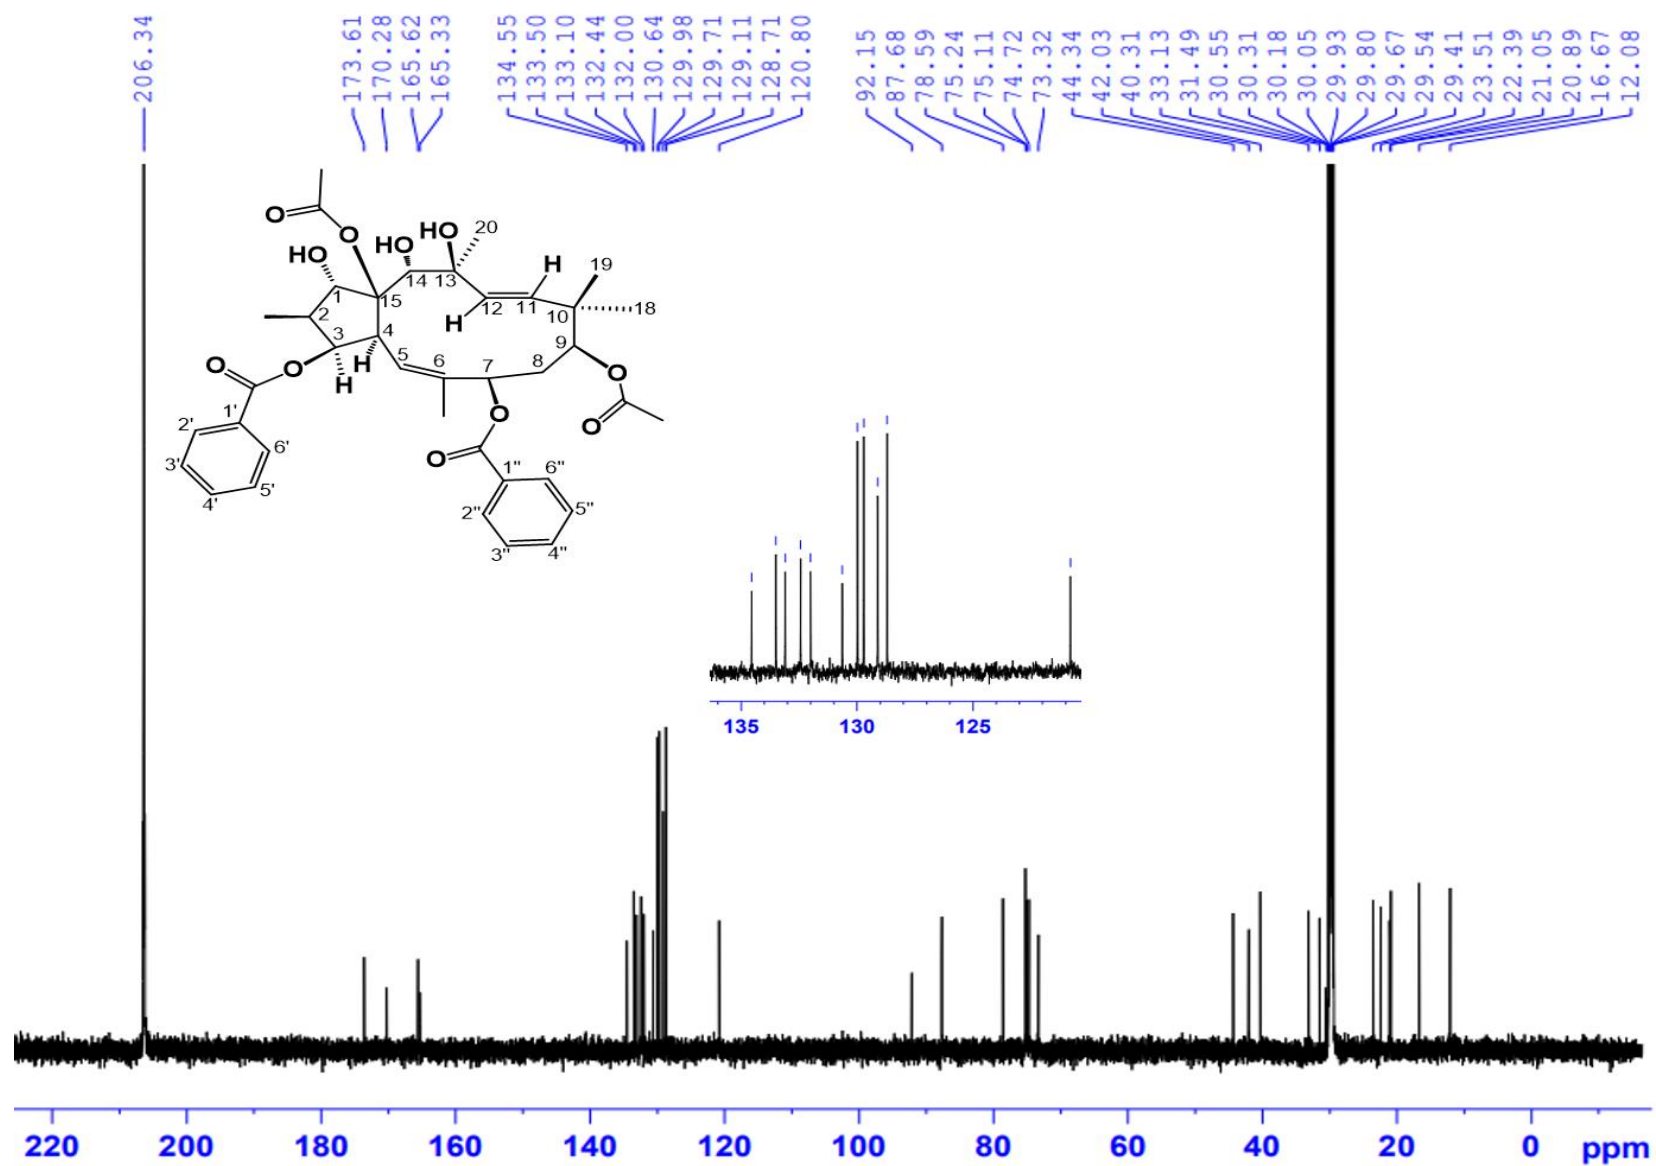



Figure S4. HSQC (Acetone- $d_6$ ) spectrum of compound P1

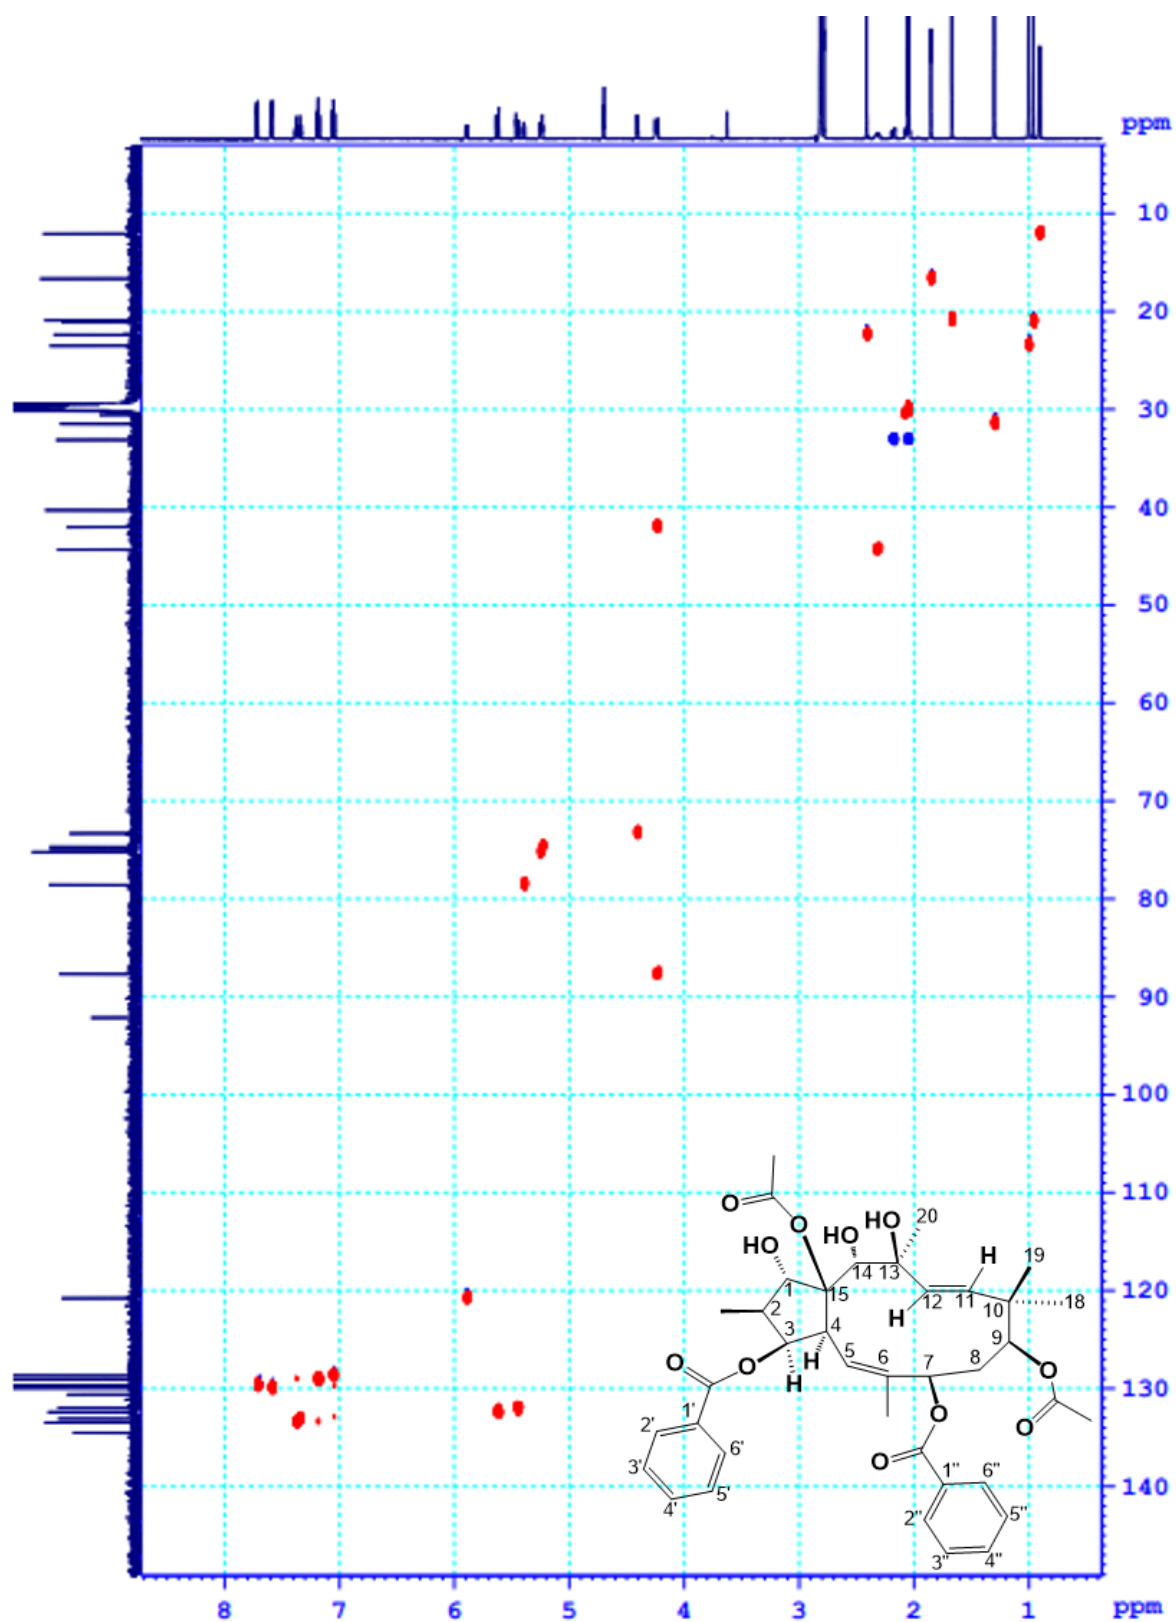

Figure S5. HMBC (Acetone- $d_6$ ) spectrum (total) of compound P1

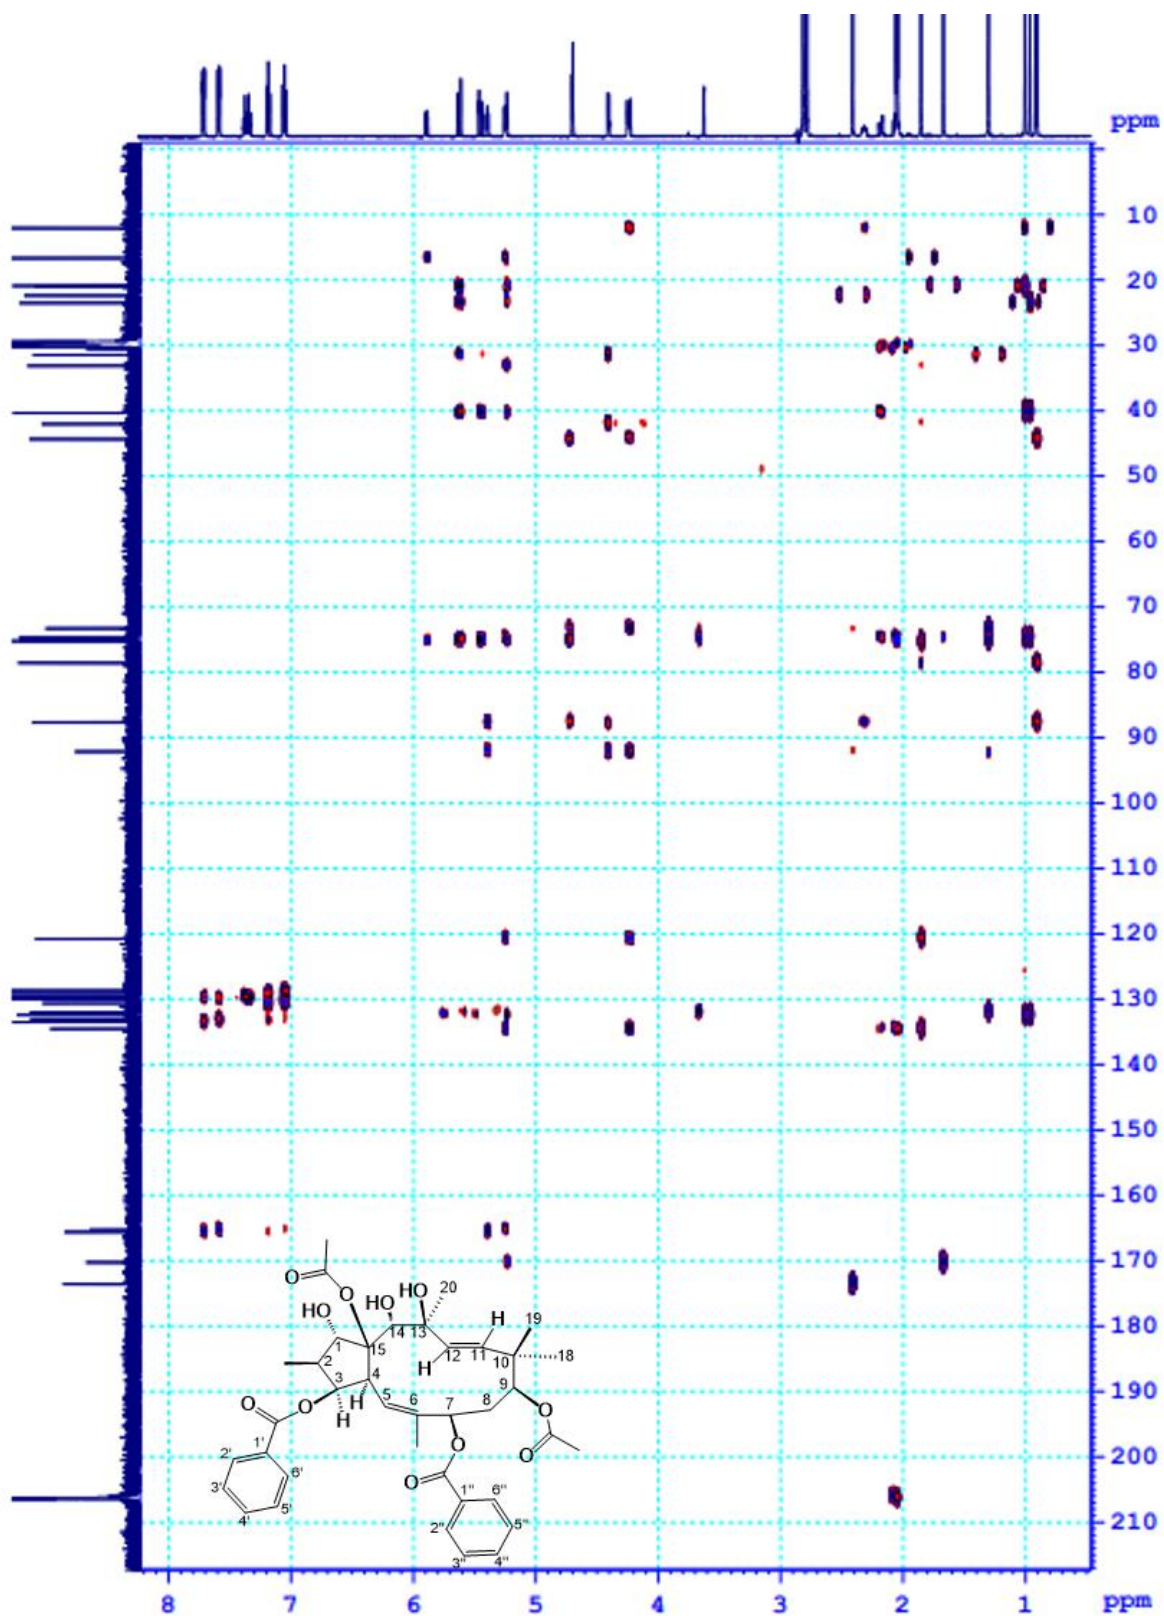

Figure S6. HMBC (Acetone- $d_6$ ) spectrum (sketched) of compound P1

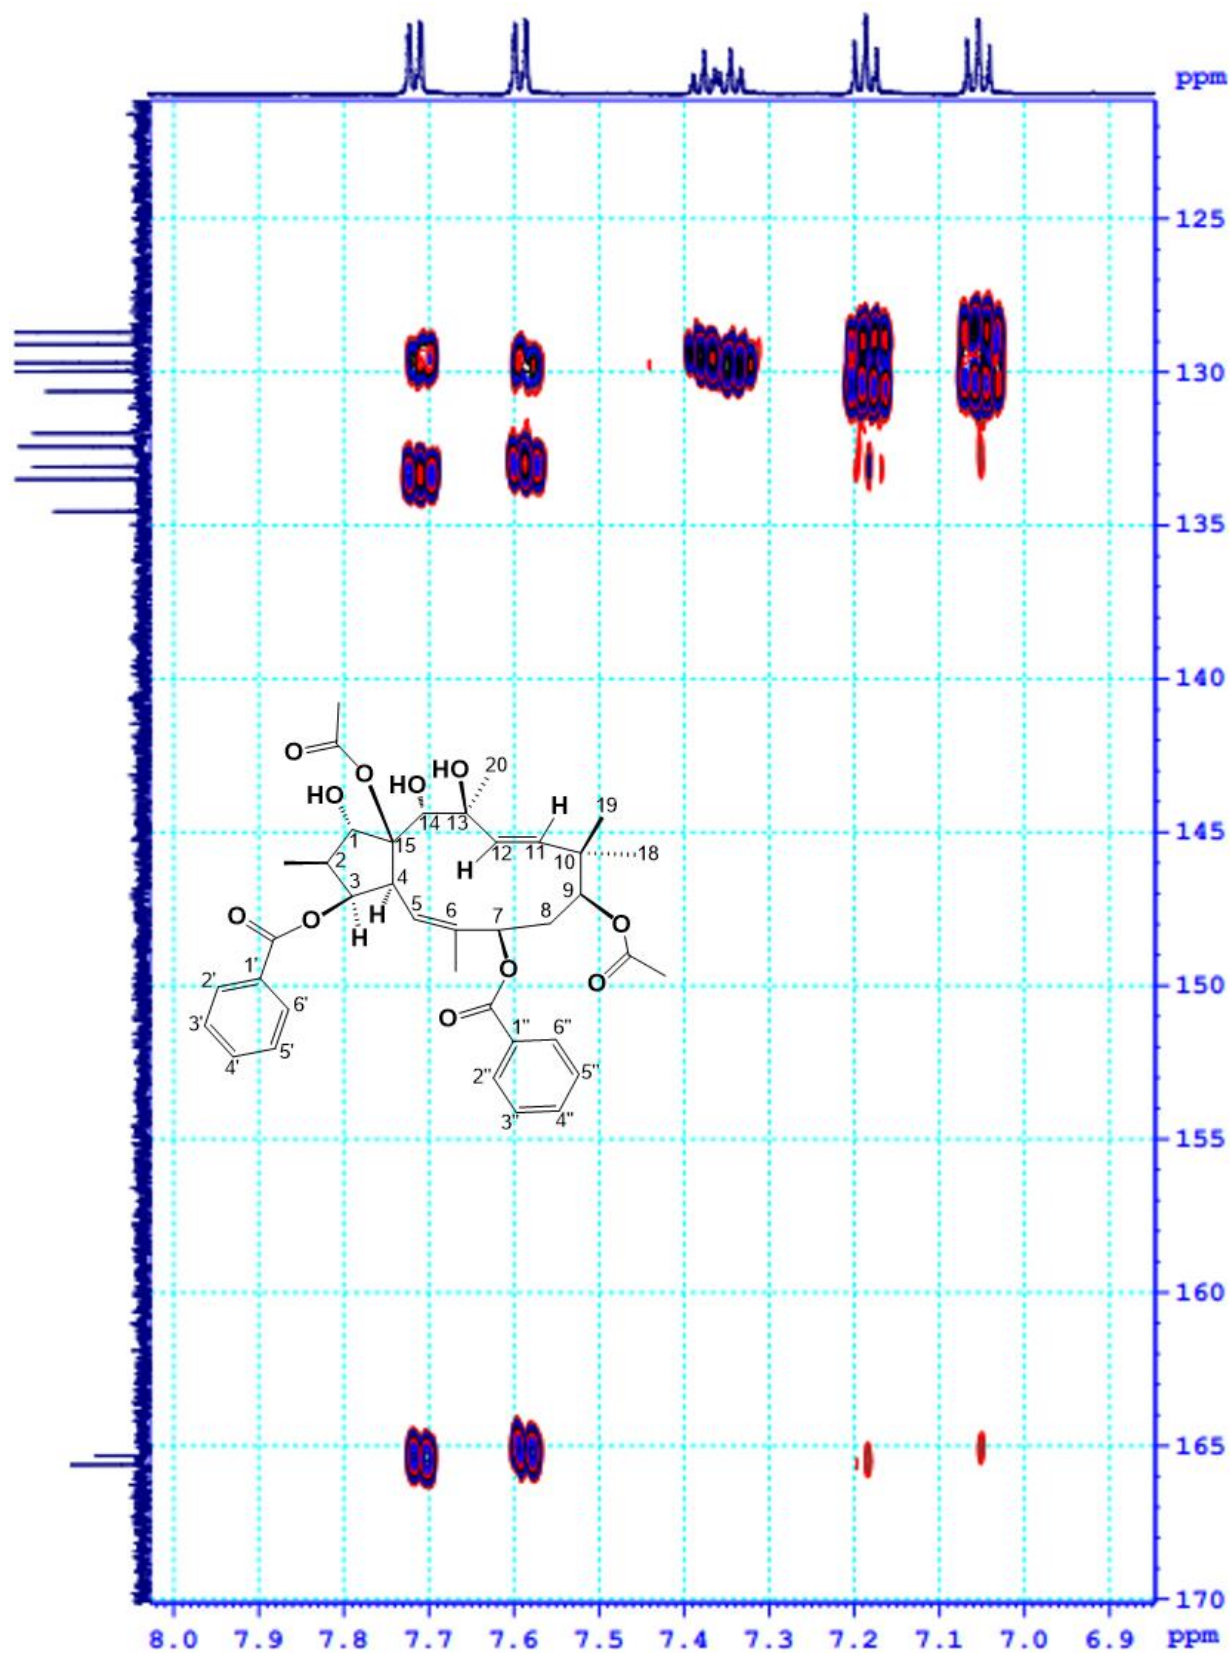

Figure S7. NOESY (Acetone- $d_6$ ) spectrum of compound P1

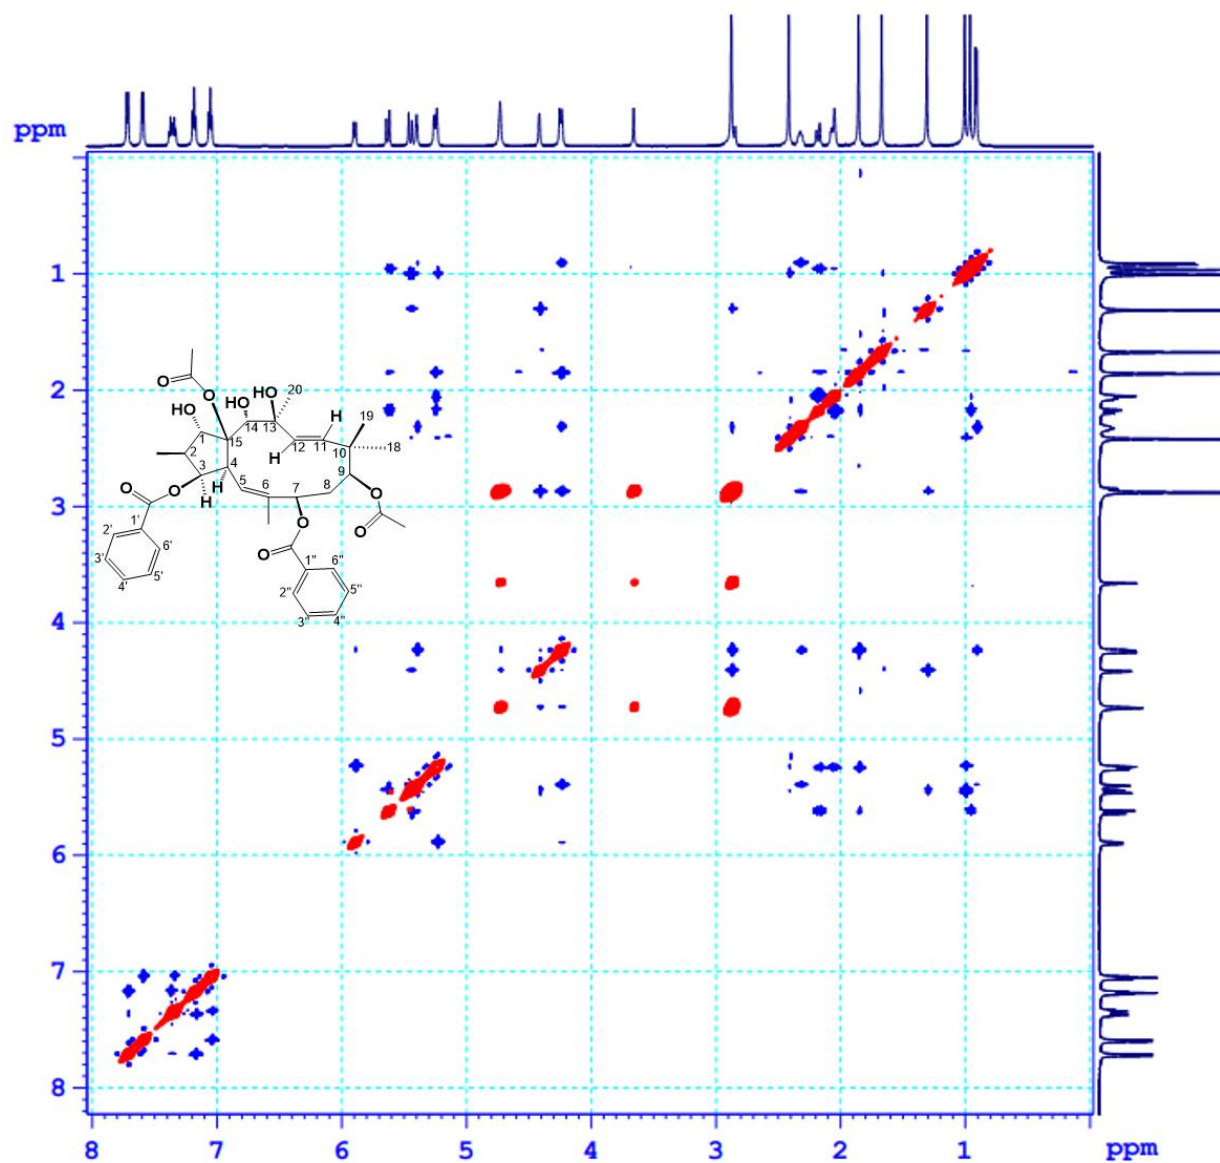



Figure S8. MS spectrum of compound P1 (Acetone-*d*<sub>6</sub>)

|             |                        |                        |         |                 |                       |
|-------------|------------------------|------------------------|---------|-----------------|-----------------------|
| Sample Name | P1                     | Position               | P1-B4   | Instrument Name | Instrument 1          |
| User Name   |                        | Inj Vol                | 2       | InjPosition     |                       |
| Sample Type | Sample                 | IRM Calibration Status | Success | Data Filename   | AS1.d                 |
| ACQ Method  | Cot ngan - MSMS_Pos1.m | Comment                |         | Acquired Time   | 21/07/2022 1:12:50 PM |

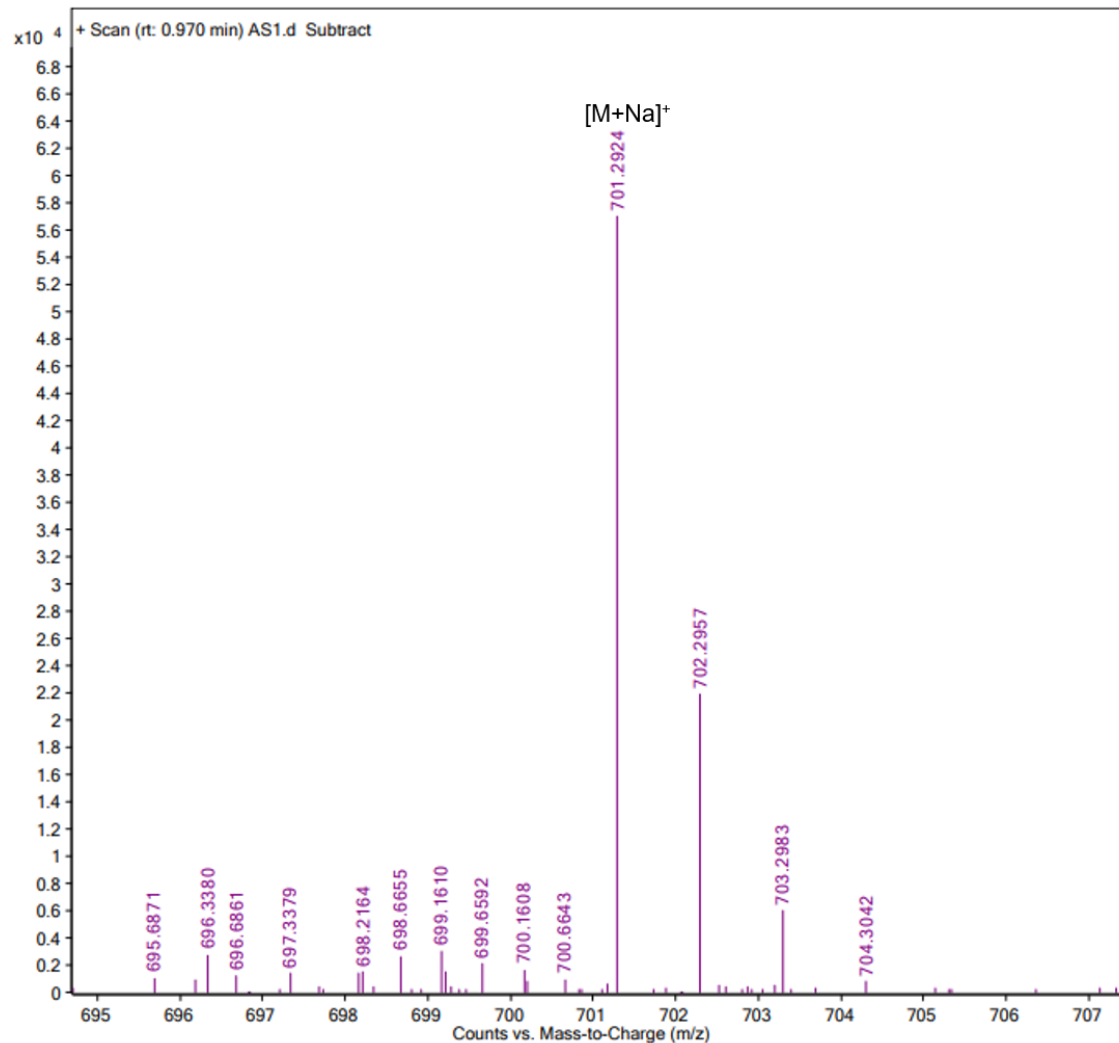

Figure S9. <sup>1</sup>H-NMR (600 MHz, CDCl<sub>3</sub>) spectrum (total) of compound P2

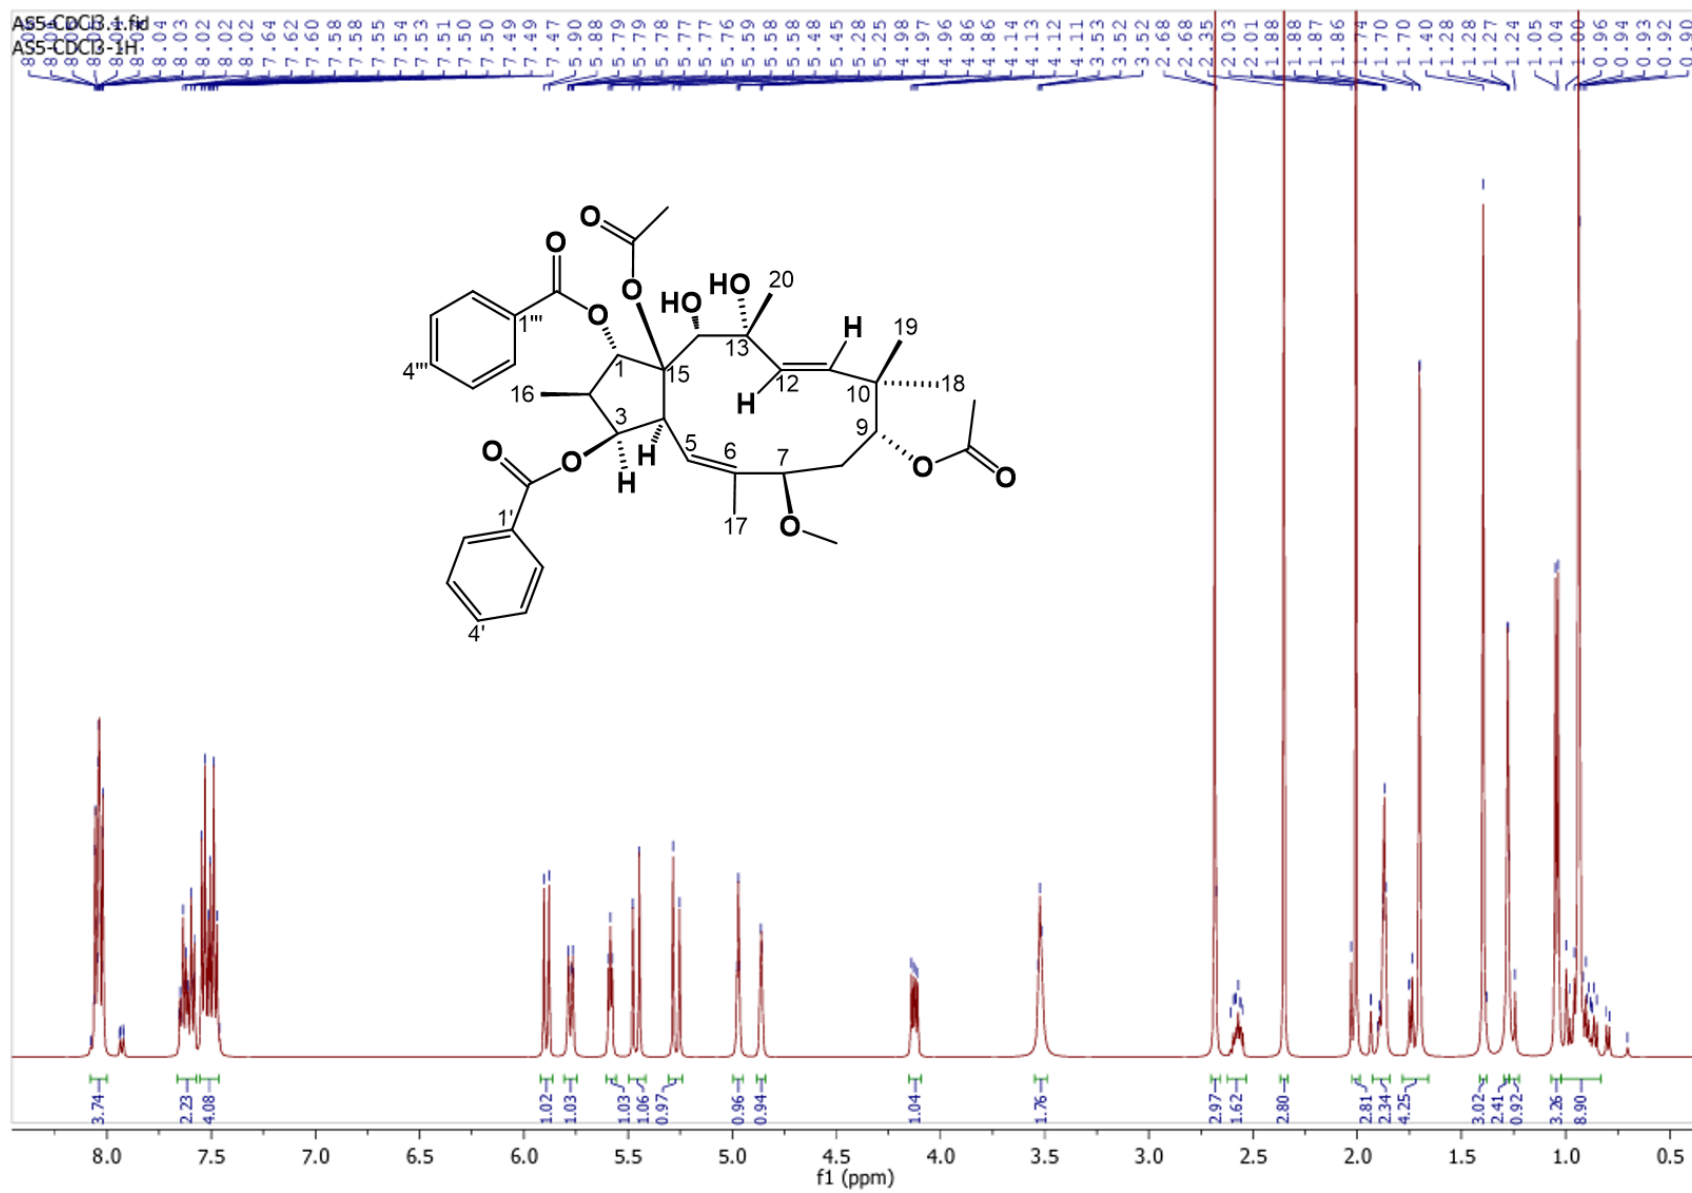

**Figure S10.**  $^1\text{H-NMR}$  (600 MHz,  $\text{CDCl}_3$ ) spectrum (sketched) of compound **P2**

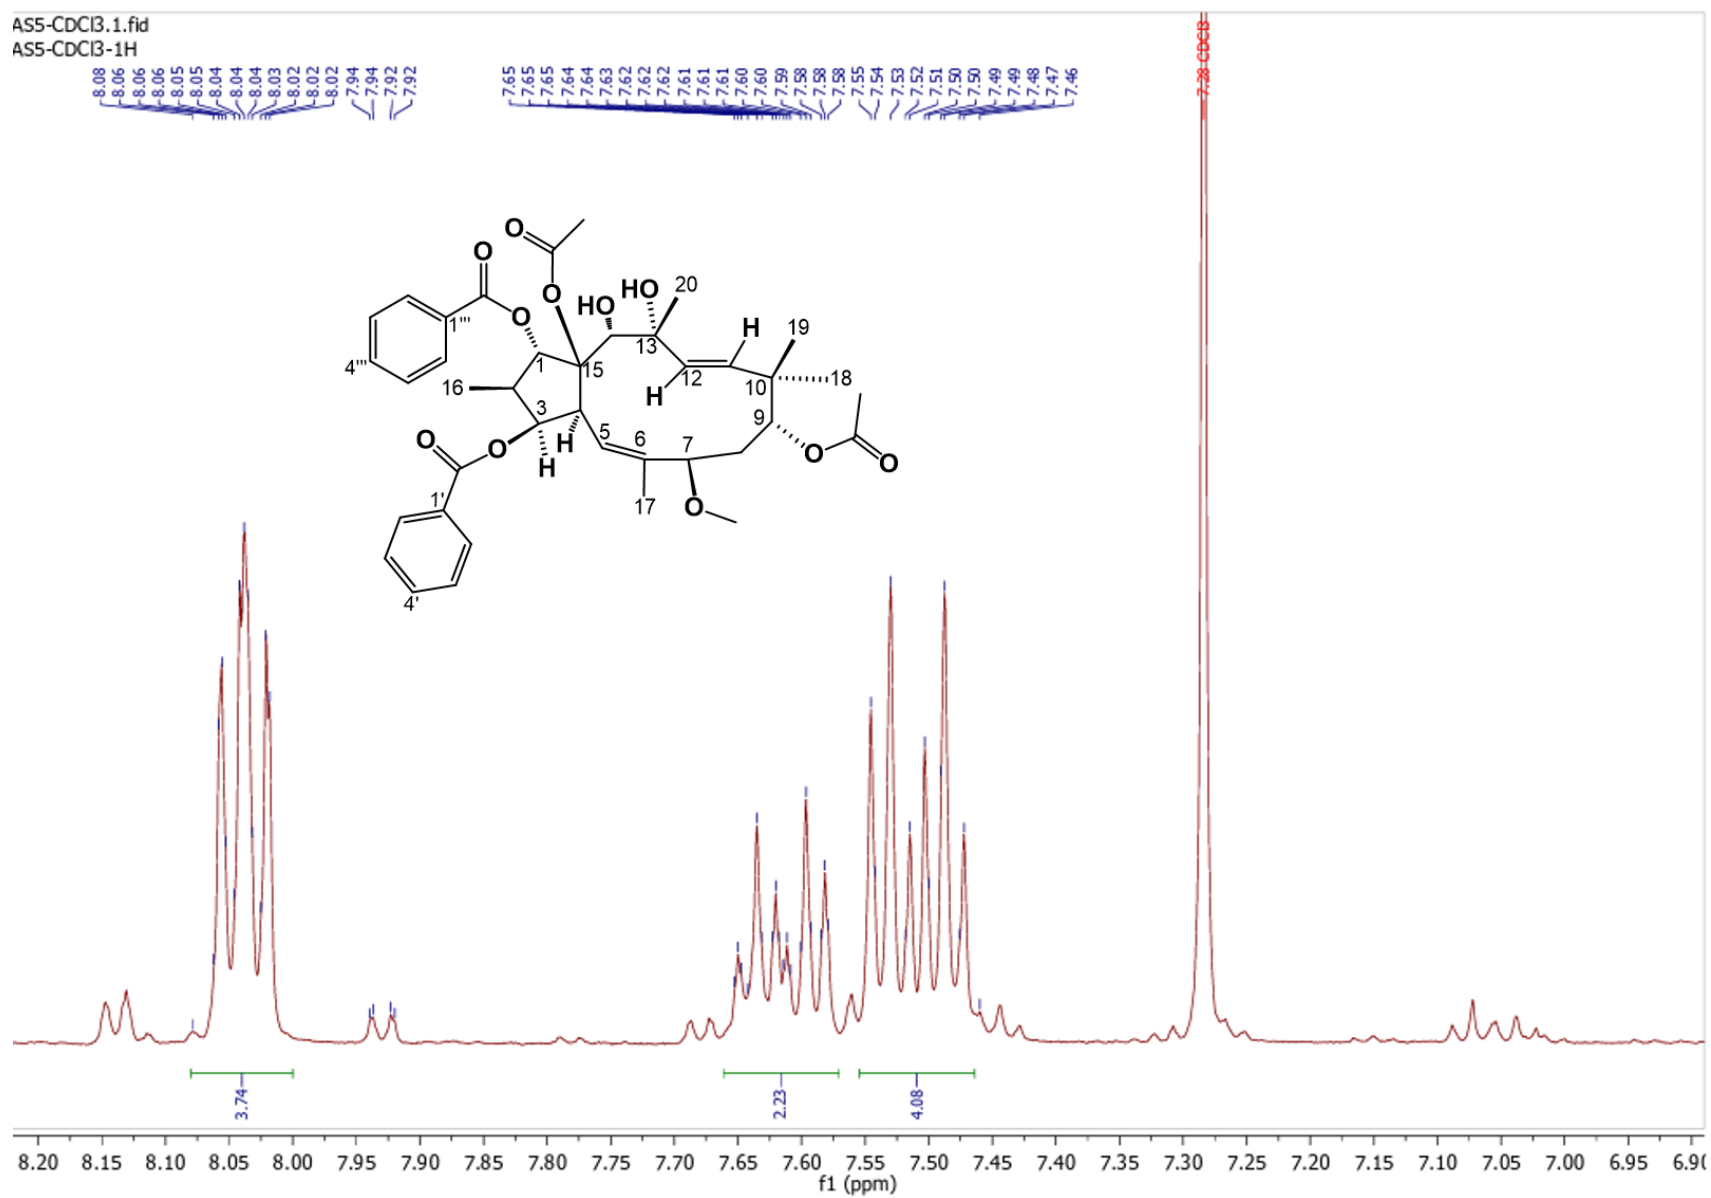

Figure S11.  $^1\text{H-NMR}$  (600 MHz,  $\text{CDCl}_3$ ) spectrum (sketched) of compound P2

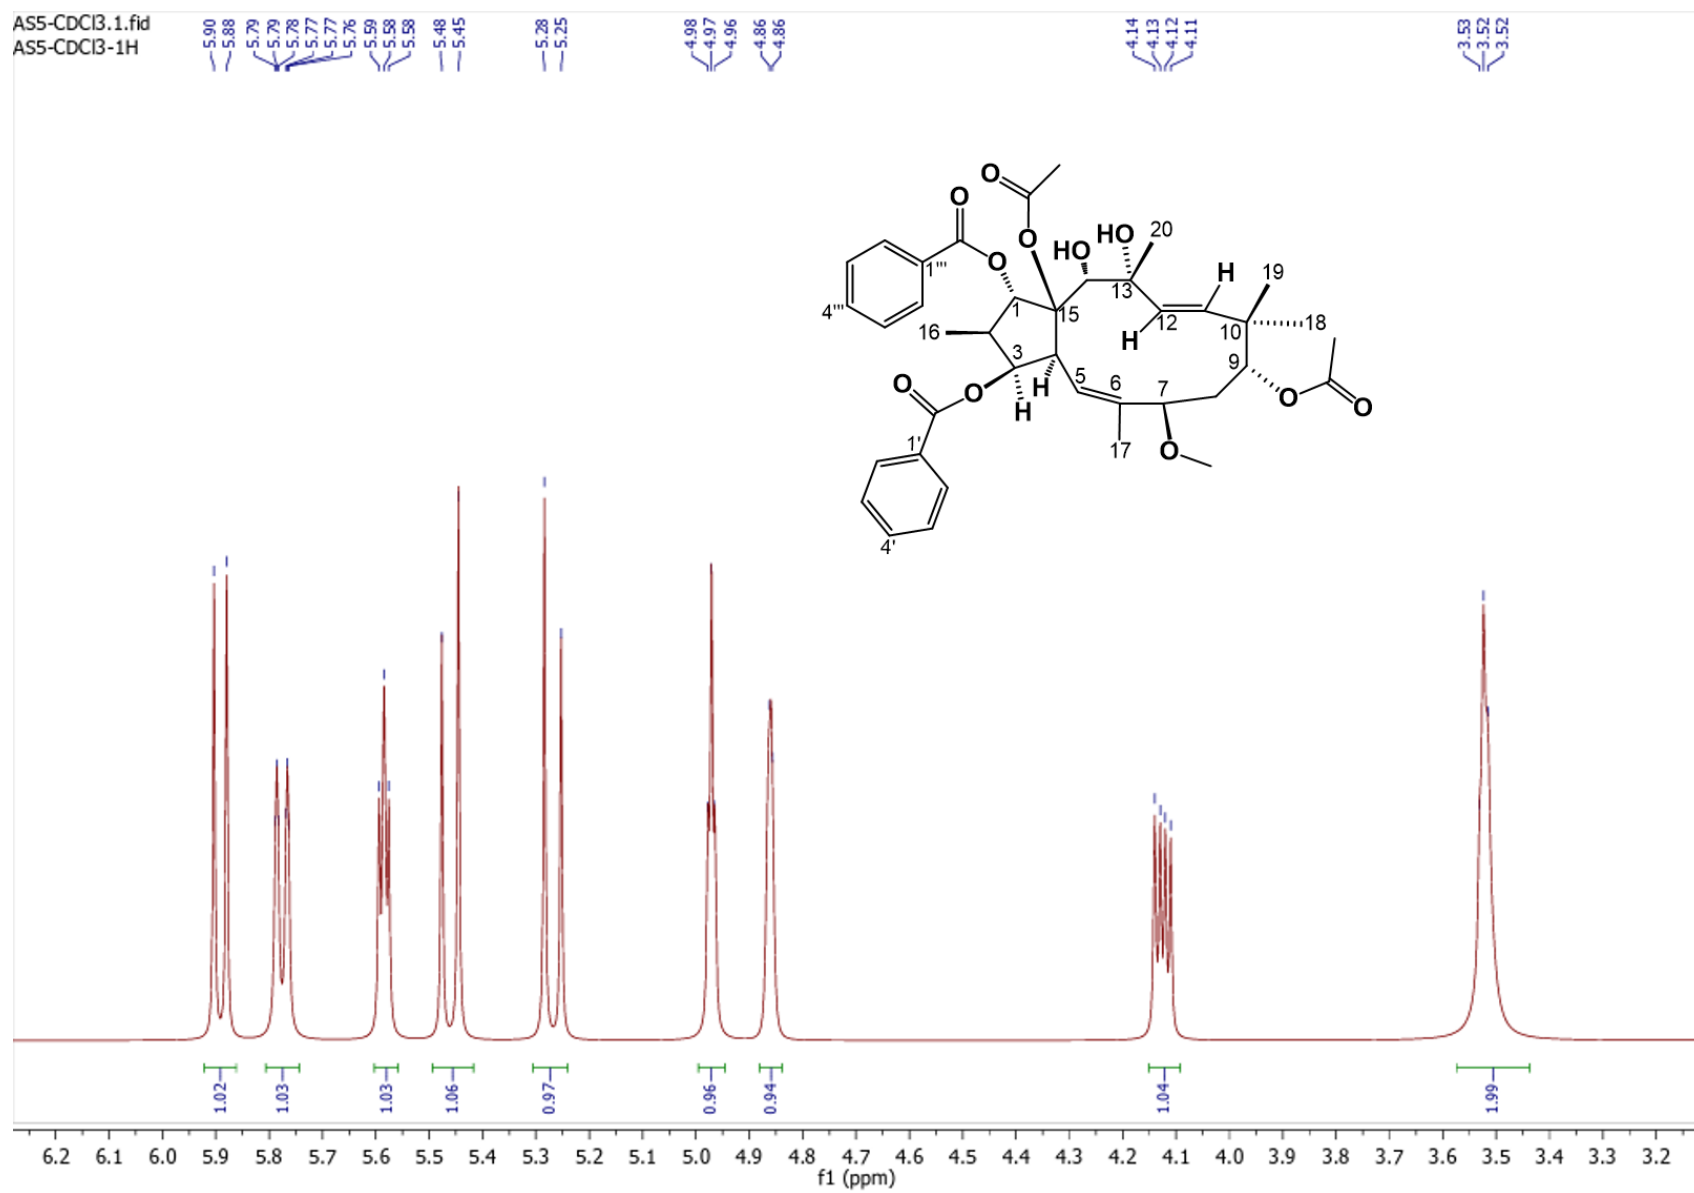

Figure S12.  $^1\text{H-NMR}$  (600 MHz,  $\text{CDCl}_3$ ) spectrum (sketched) of compound P2

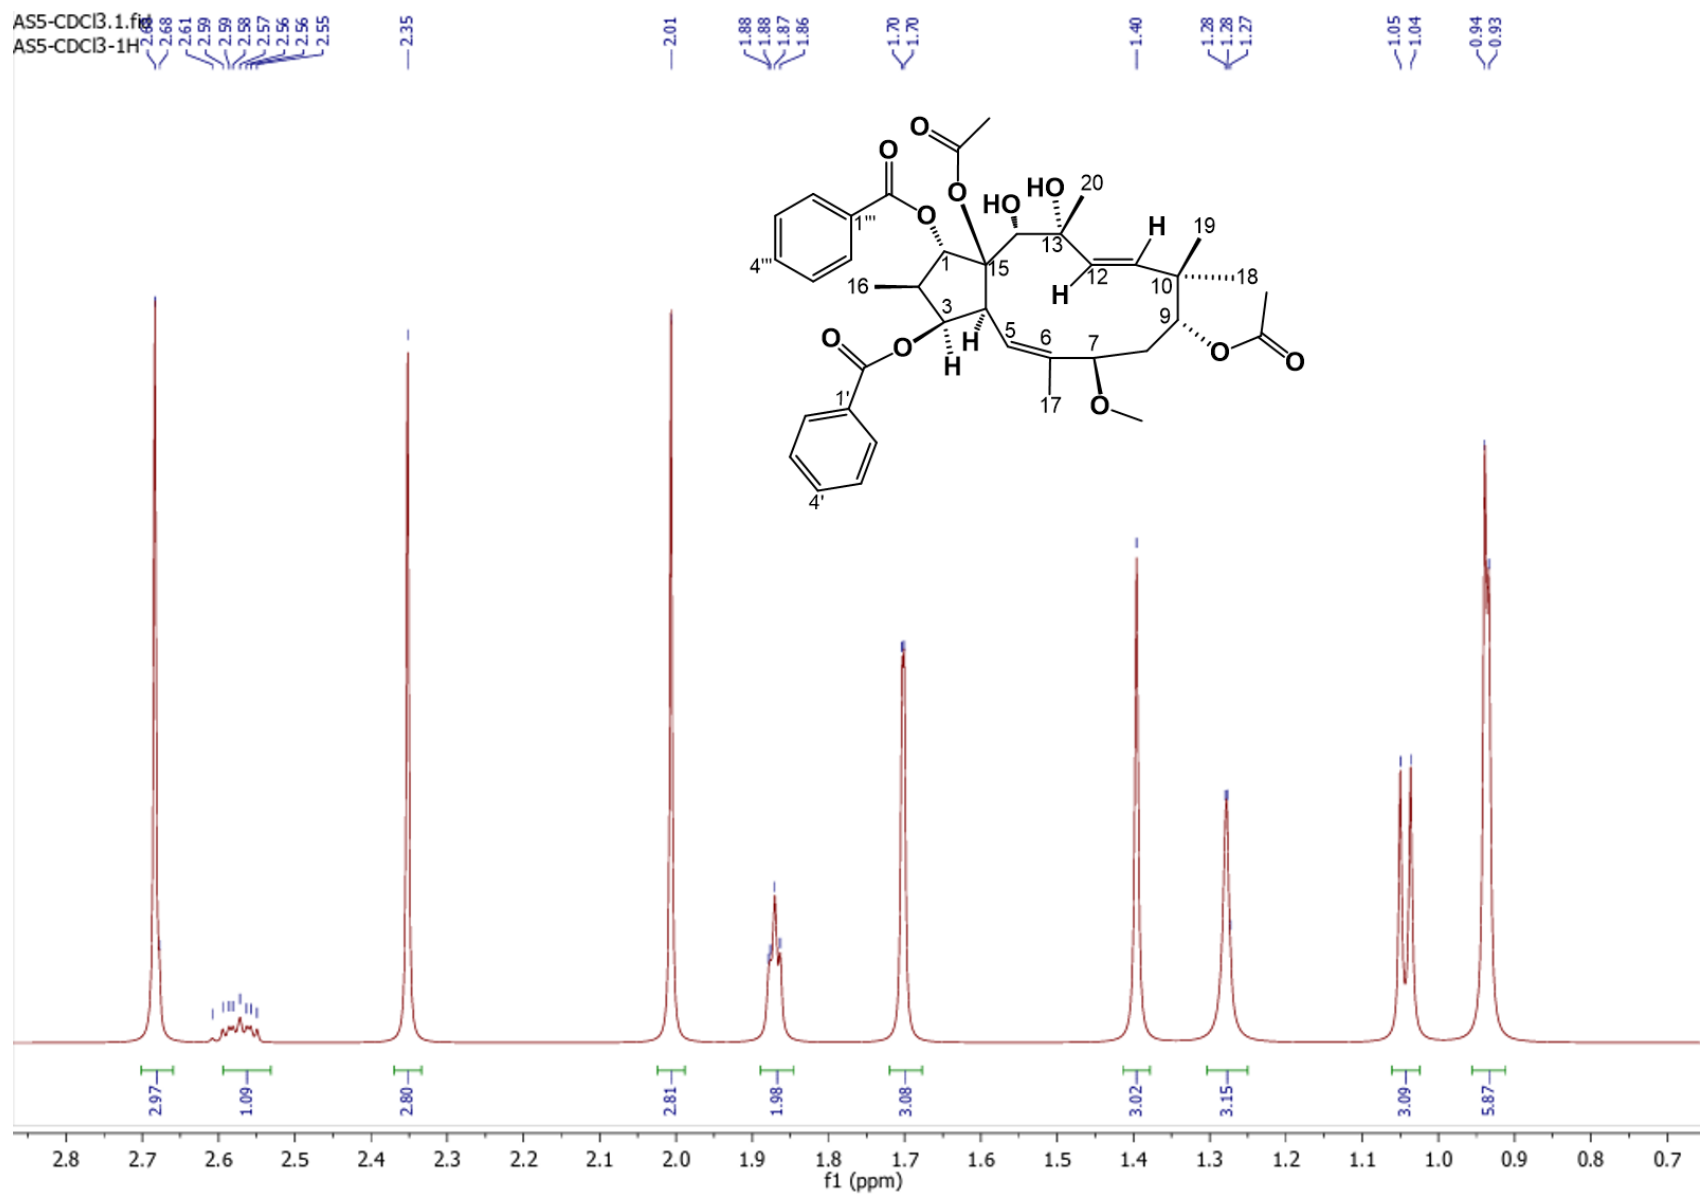

Figure S13.  $^{13}\text{C}$ -NMR (125 MHz,  $\text{CDCl}_3$ ) spectrum of compound P2

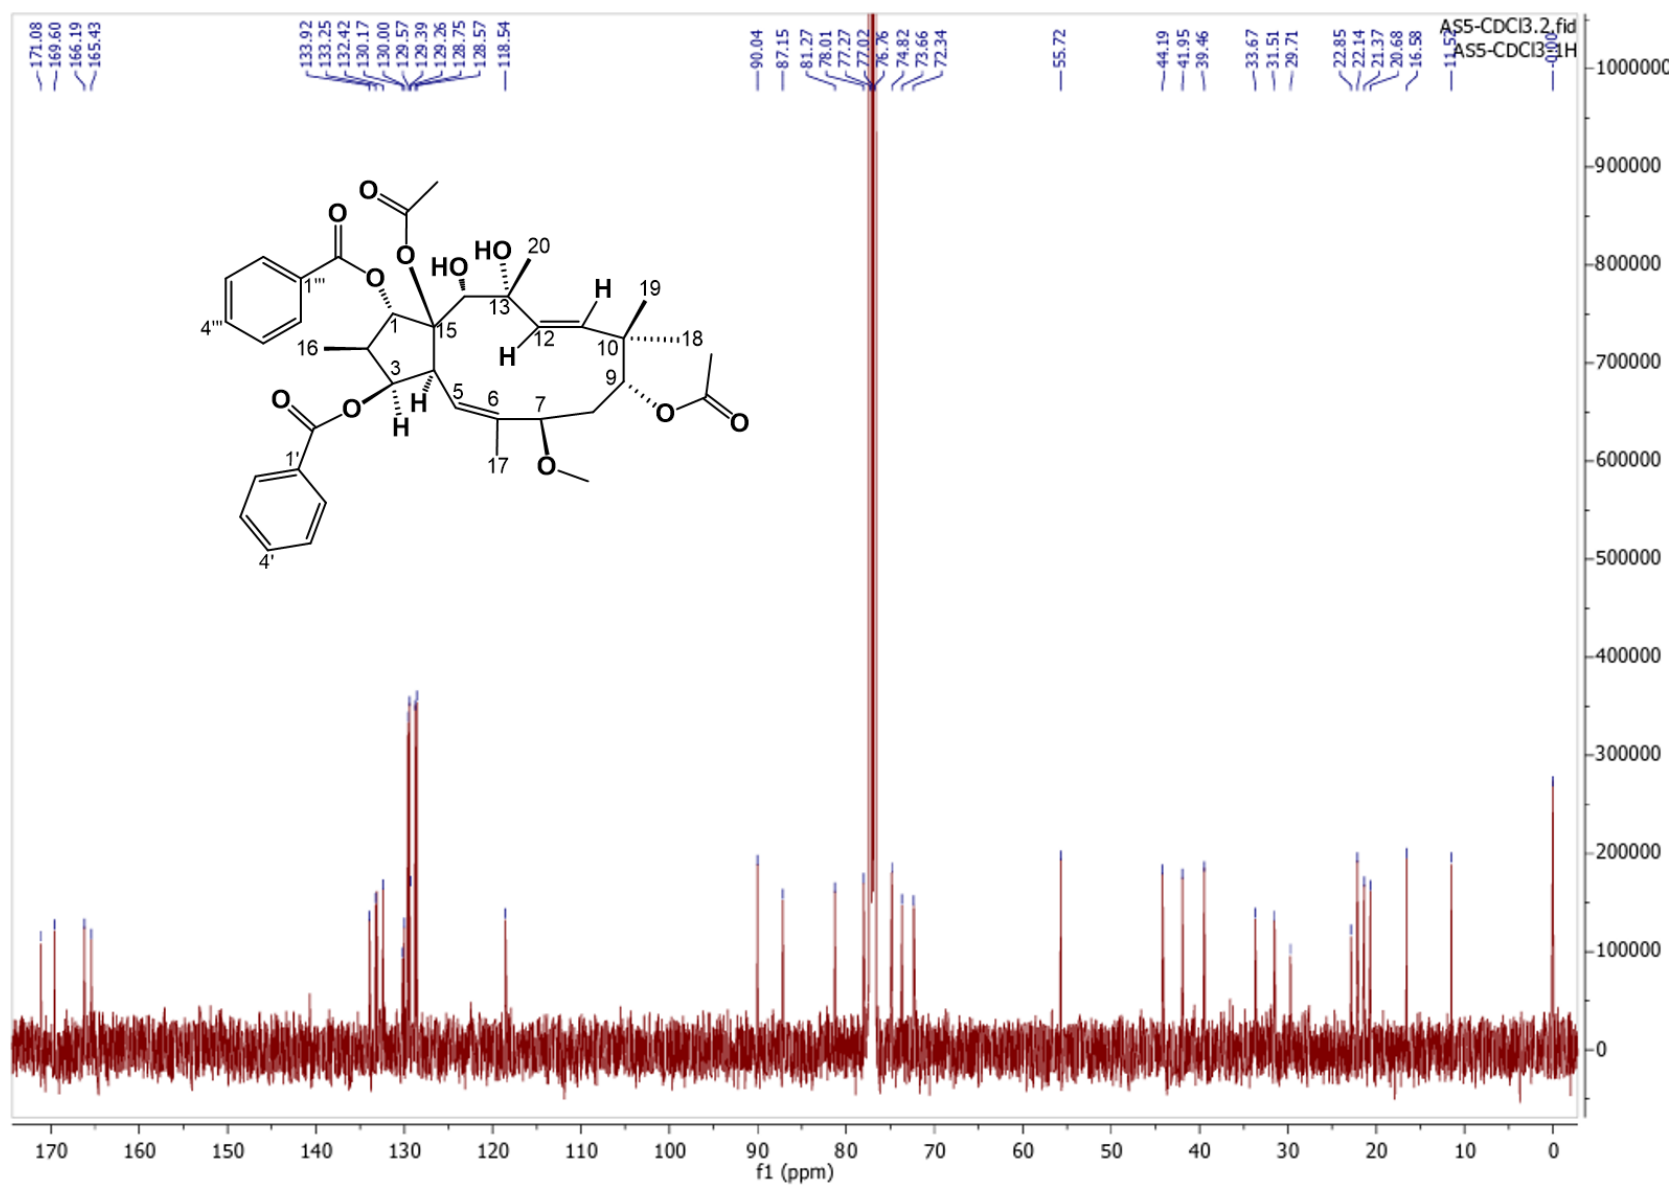

Figure S14. COSY (CDCl<sub>3</sub>) spectrum of compound P2

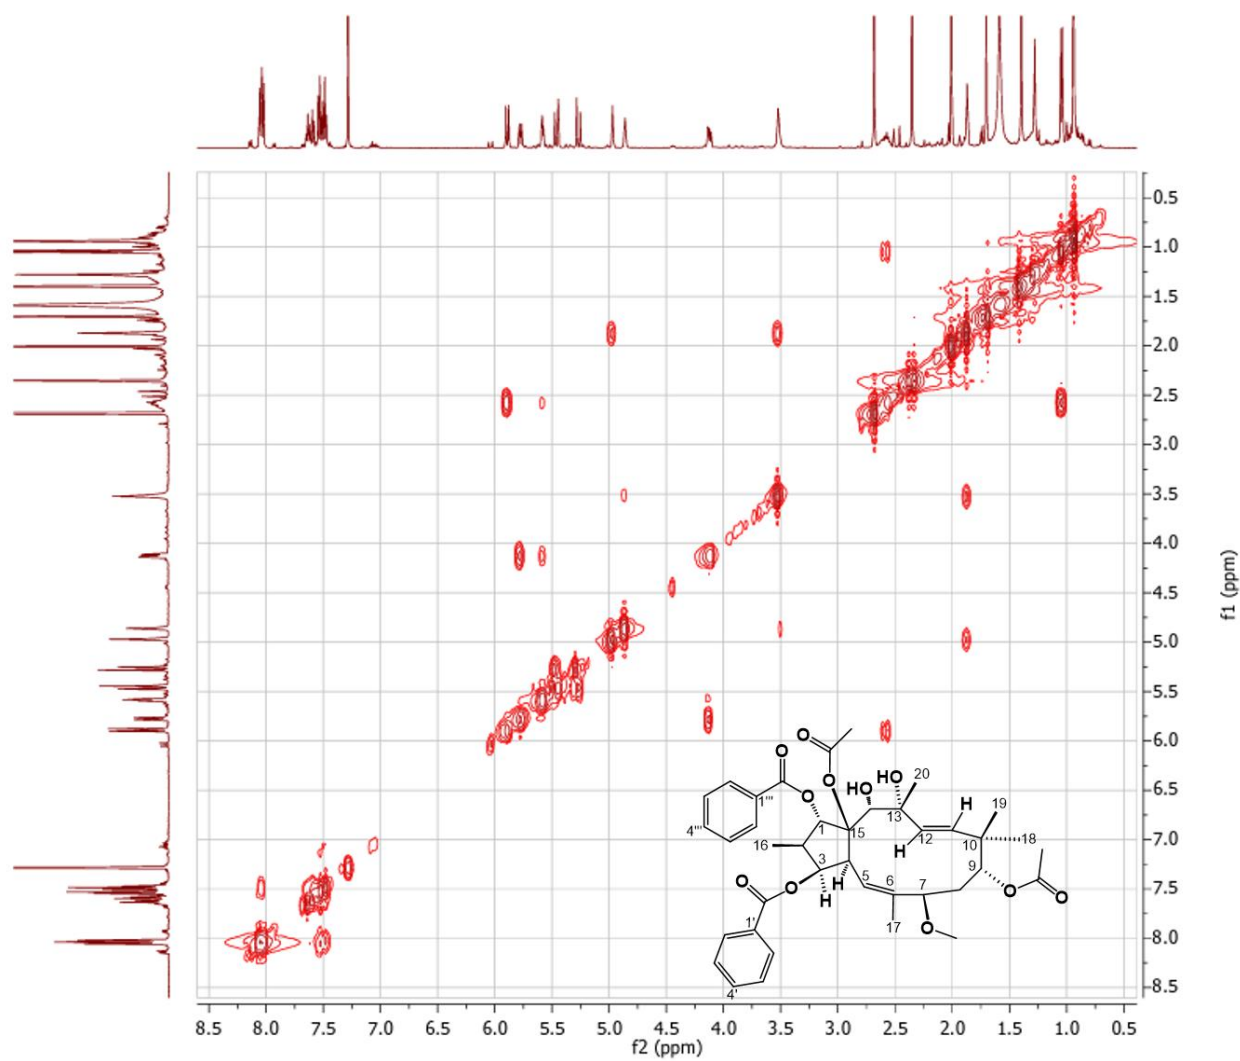

Figure S15. HSQC (CDCl<sub>3</sub>) spectrum of compound P2

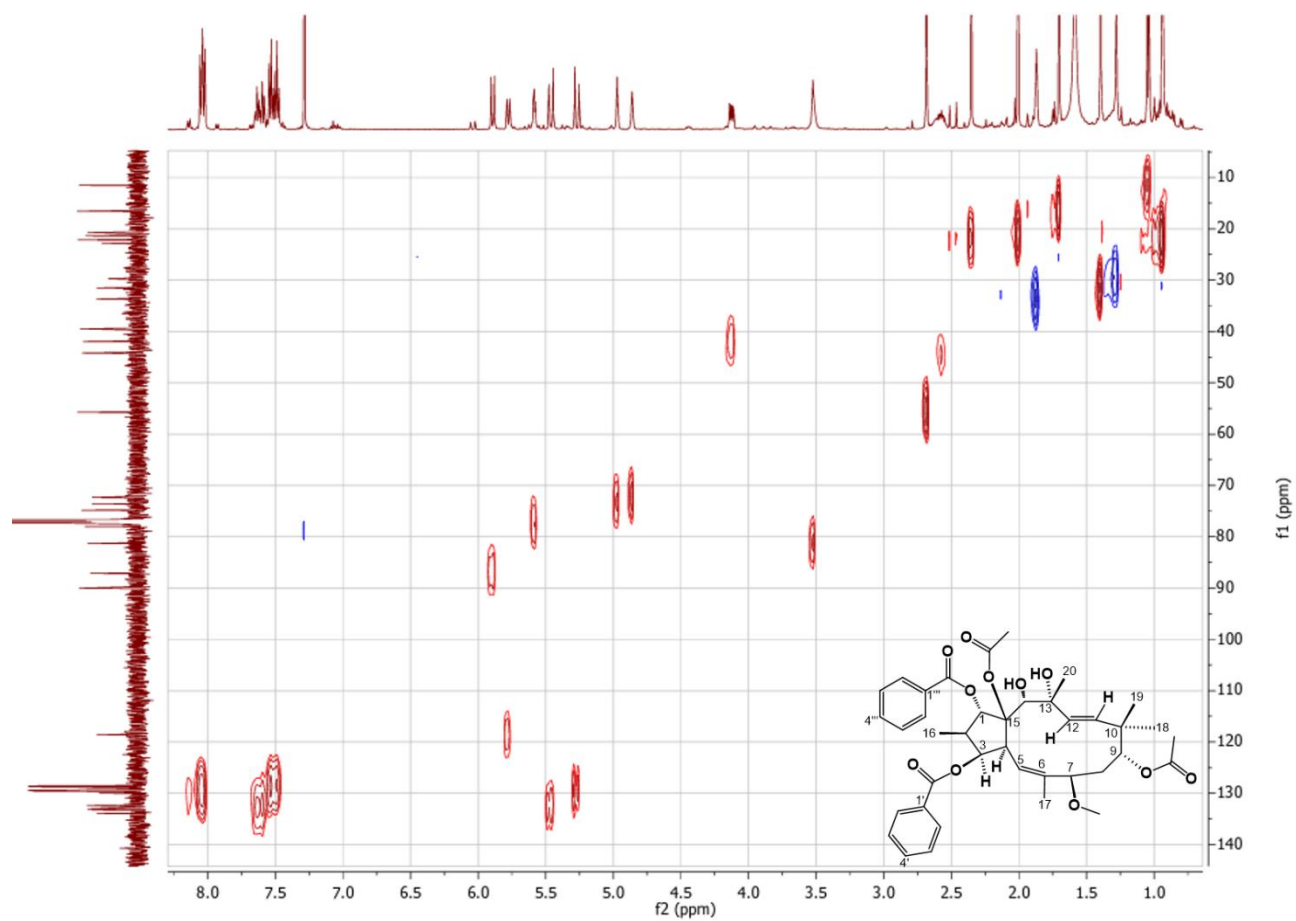



Figure S16. HMBC (CDCl<sub>3</sub>) spectrum of compound P2

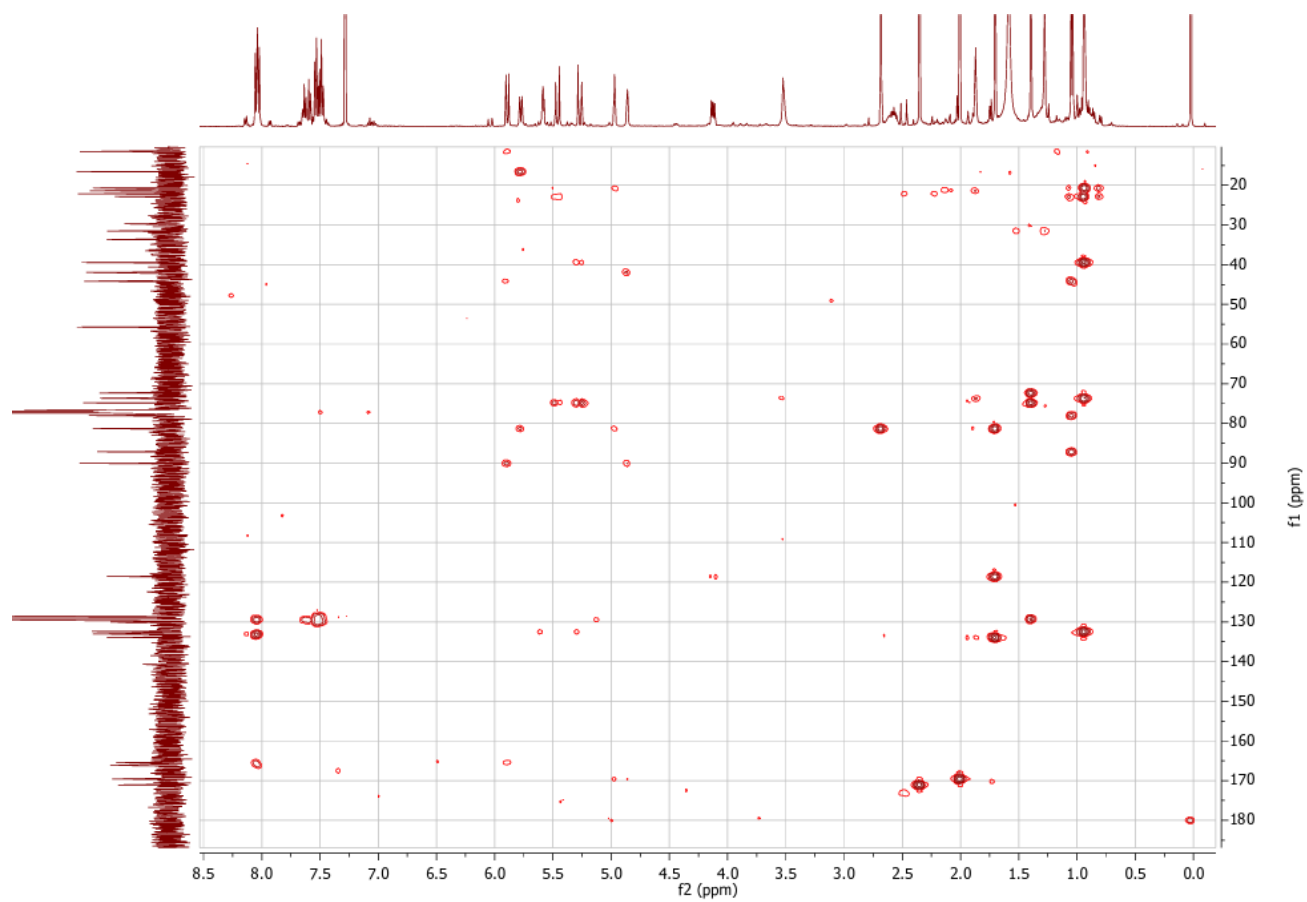

Figure S17. NOESY (CDCl<sub>3</sub>) spectrum of compound P2

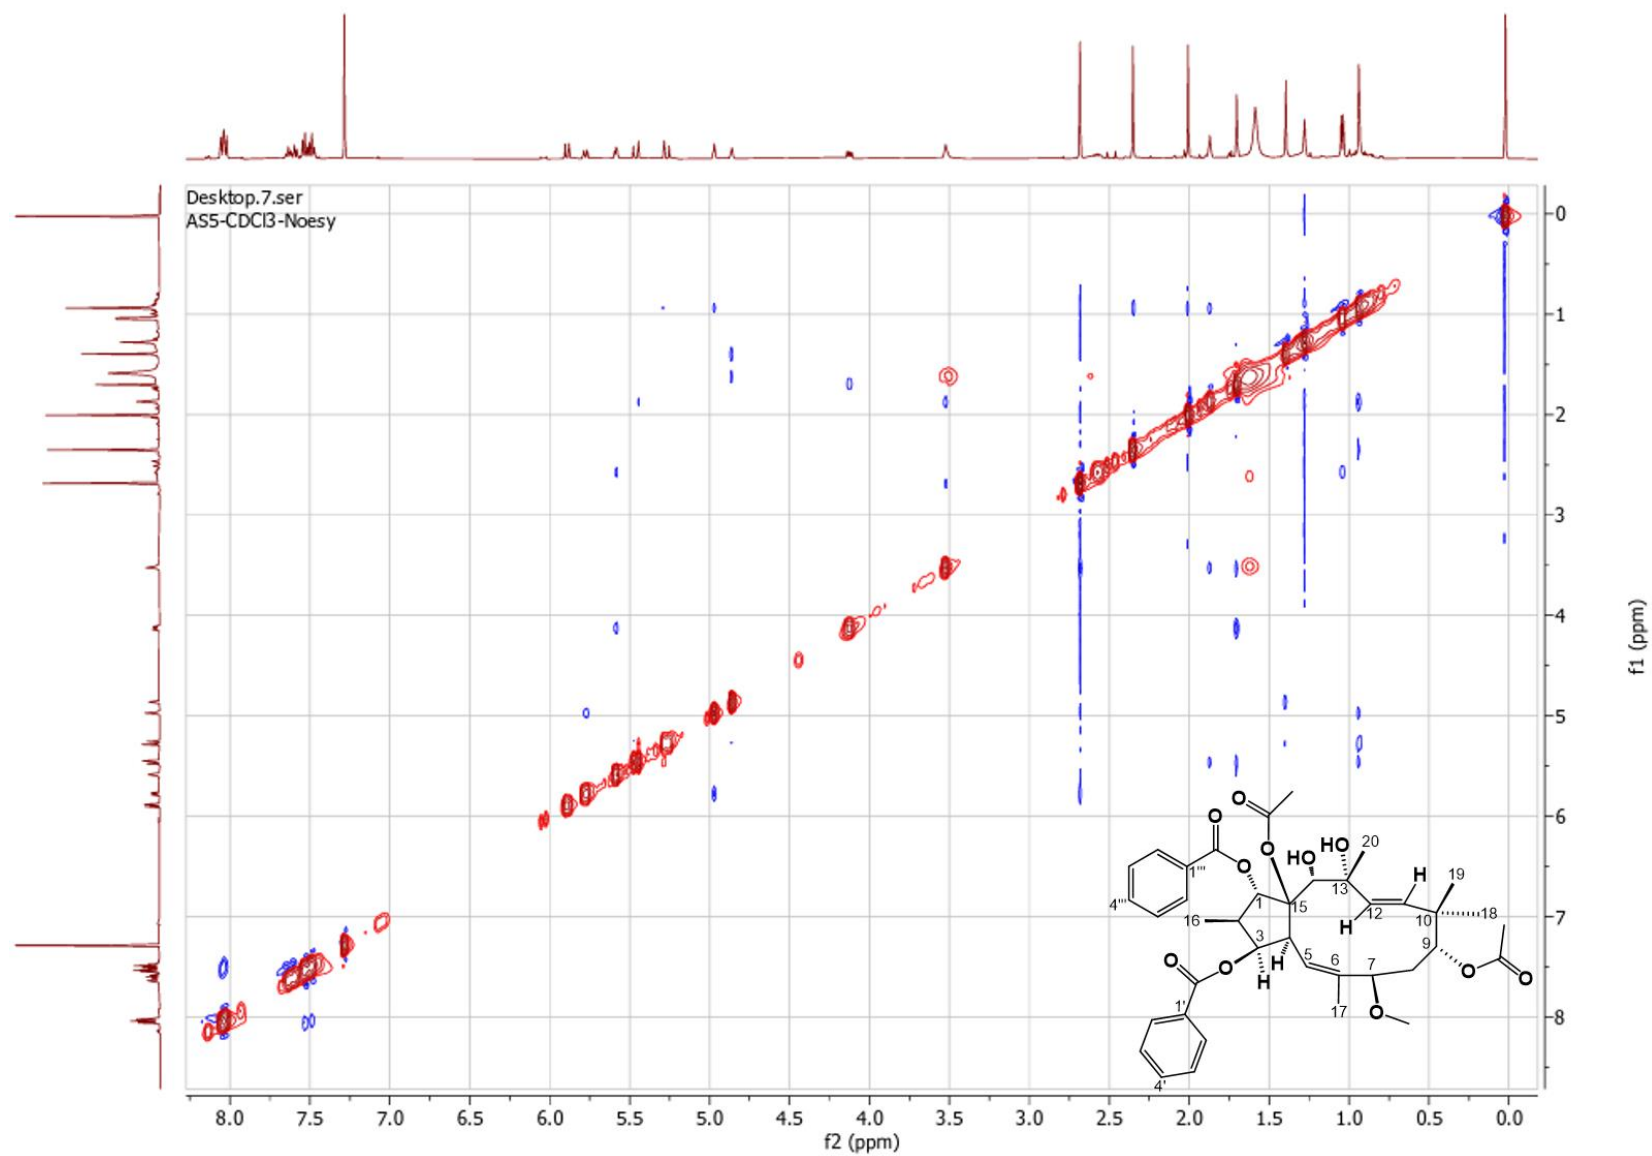

Figure S18. MS spectrum of compound **P2** (CDCl<sub>3</sub>)

Qualitative Analysis Report

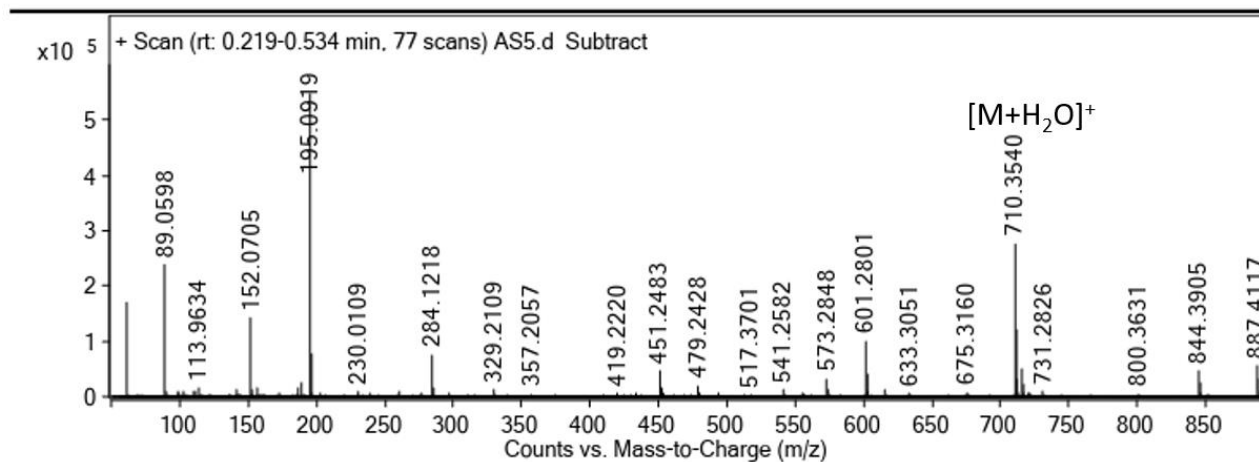

Peak List

| m/z      | z | Abund     |
|----------|---|-----------|
| 61.0285  | 1 | 169672.11 |
| 89.0598  | 1 | 236870.75 |
| 152.0705 | 1 | 141642.3  |
| 188.9844 |   | 26439.52  |
| 195.0919 | 1 | 546454.56 |
| 196.0949 | 1 | 76147.08  |
| 284.1218 | 1 | 75256.98  |
| 451.2483 | 1 | 45962.73  |
| 573.2848 | 1 | 32360.98  |
| 601.2801 | 1 | 99619.84  |
| 602.2833 | 1 | 39579.84  |
| 710.354  | 1 | 275875.59 |
| 711.3573 | 1 | 119438.33 |
| 712.3597 | 1 | 31923.49  |
| 715.3092 | 1 | 48769.35  |
| 716.3123 | 1 | 20847.97  |
| 844.3905 | 1 | 45516.91  |
| 845.3935 | 1 | 24288.24  |
| 887.4117 | 1 | 55378.14  |
| 888.4146 | 1 | 32324.56  |

Figure S19. Structural novelty check of compound P2

The screenshot shows the CAS Scifinder search results for a drawn structure. The search criteria are set to "Substructure (2)" and "Similarity (155K)". Two results are displayed:

- 1946844-18-3**: C45H50O12. Absolute stereochemistry shown, Rotation (-). E/Z labels describe double bond geometry.
- 1946844-15-0**: C45H49BrO12. Benzoic acid, 4-bromo-, (1S,2R,3S,3a,5,4E,6R,8R,10E,12R,13R,13aR)-8,13a-bis(acety...).

Each result includes a chemical structure, a molecular formula, and buttons for "References", "Reactions", and "Supplier".

The summary panel shows the search criteria and options:

- Substances** 10:35 PM
- Chemical structure of the drawn structure.
- As Drawn (0)
- Substructure (2)
- Similarity (155K)
- Rerun Search** button
- Edit Search** button

Figure S20. <sup>1</sup>H-NMR (600 MHz, Acetone-*d*<sub>6</sub>) spectrum of compound P3

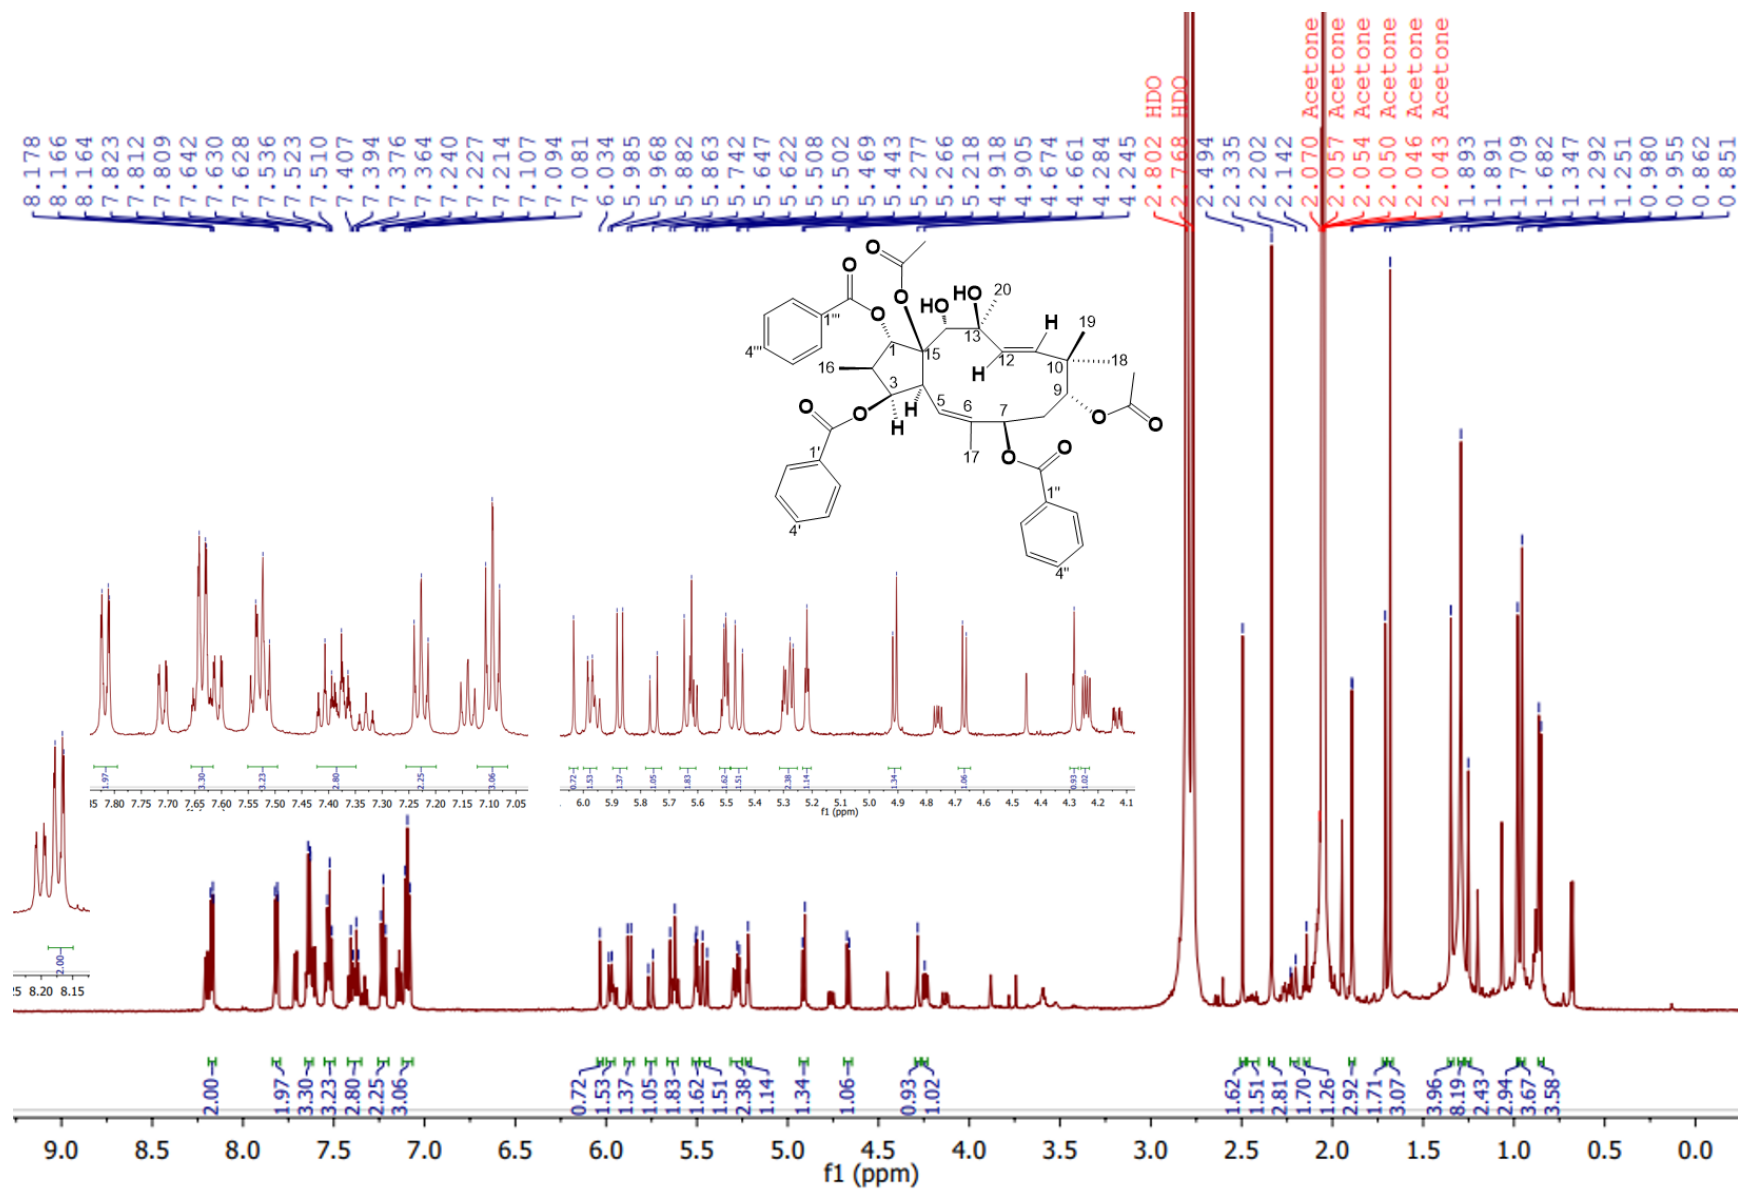

Figure S21. <sup>1</sup>H-NMR (600 MHz, Acetone-*d*<sub>6</sub>) (sketched) spectrum of compound **P3**

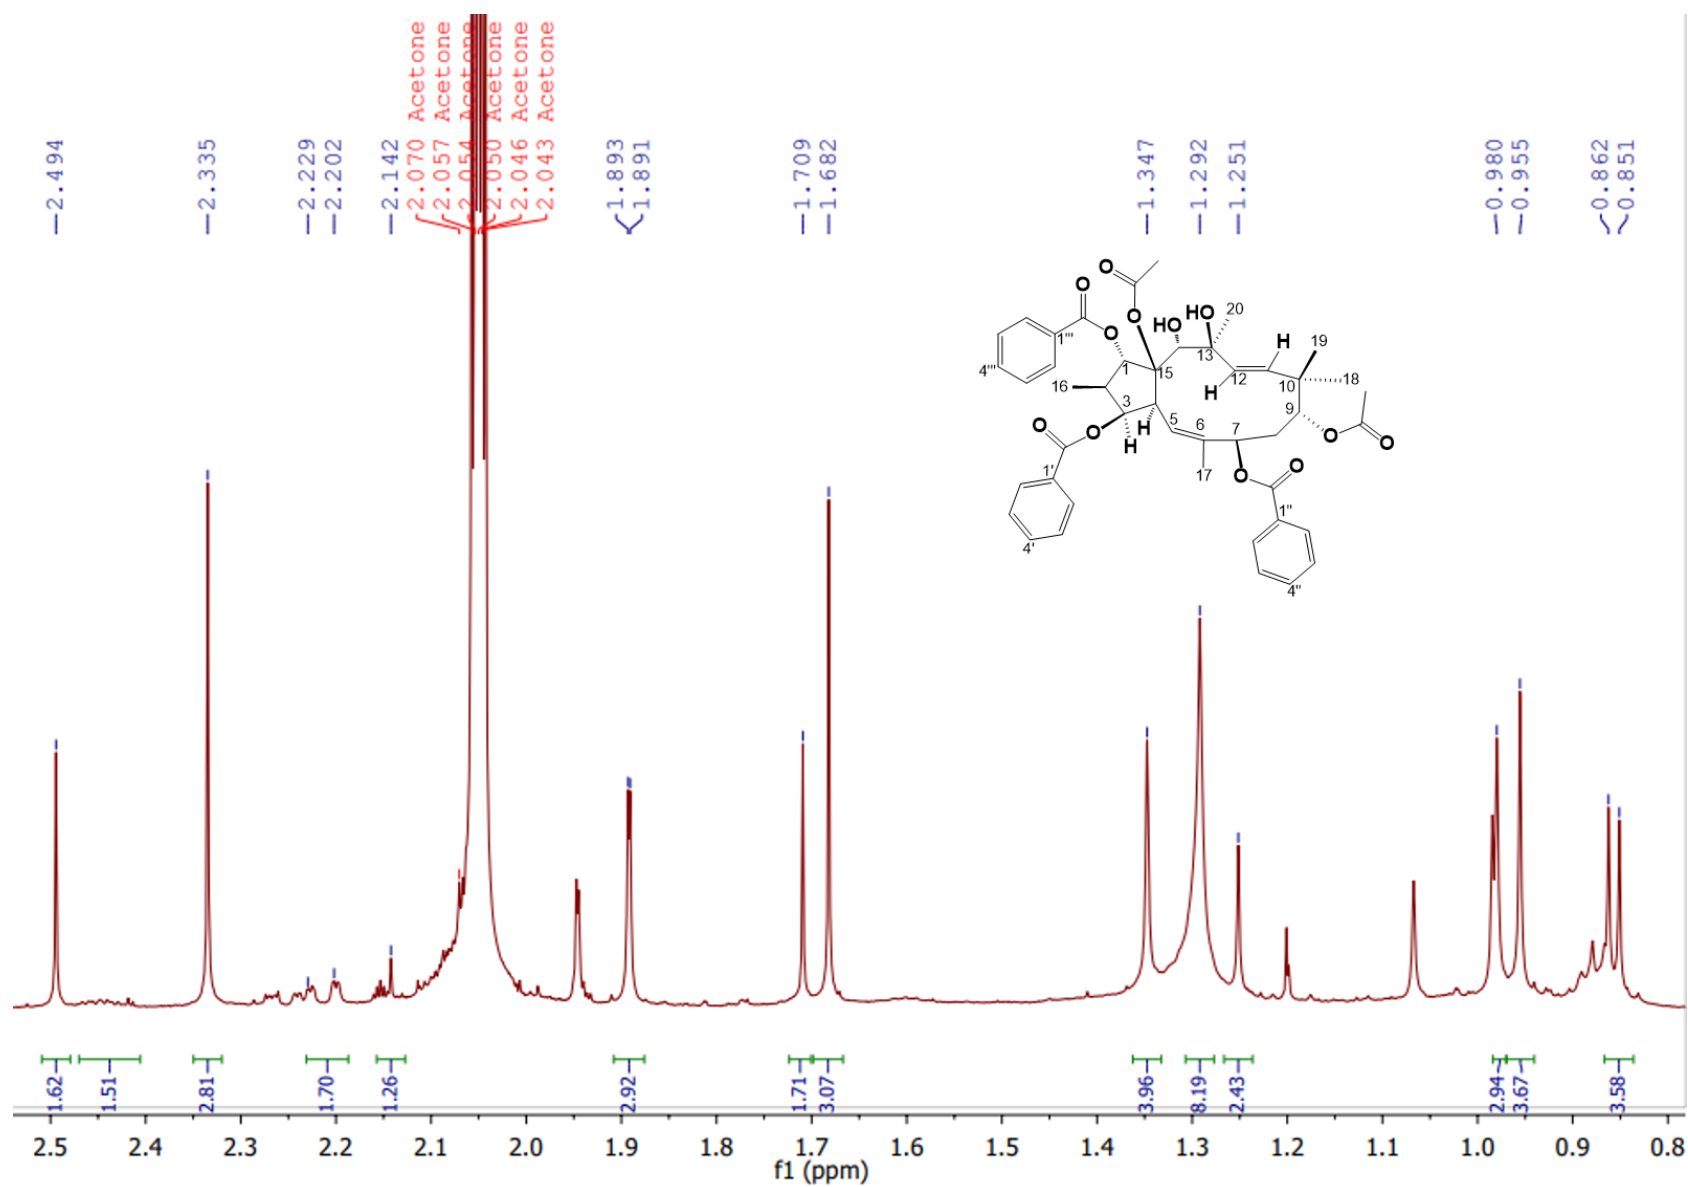

Figure S22.  $^{13}\text{C}$ -NMR (125 MHz, Acetone- $d_6$ ) spectrum of compound P3

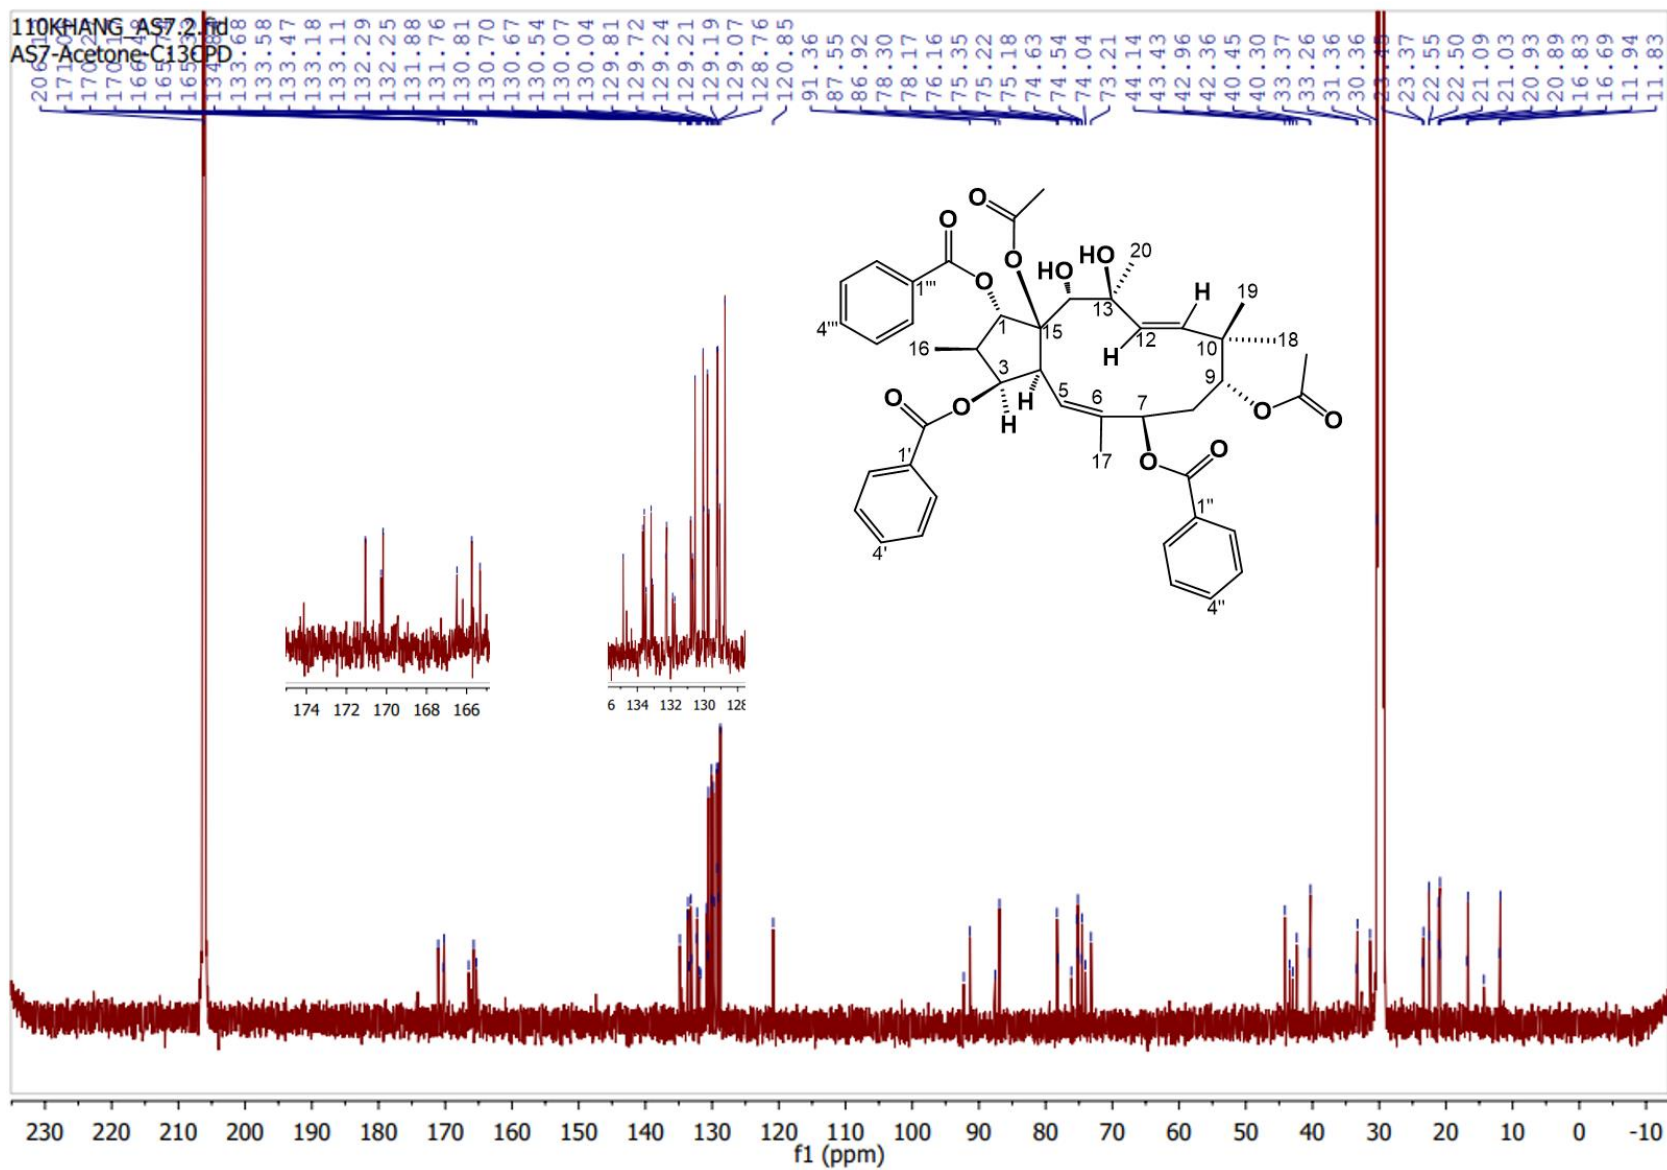

Figure S23. COSY spectrum of compound P3 (Acetone- $d_6$ )

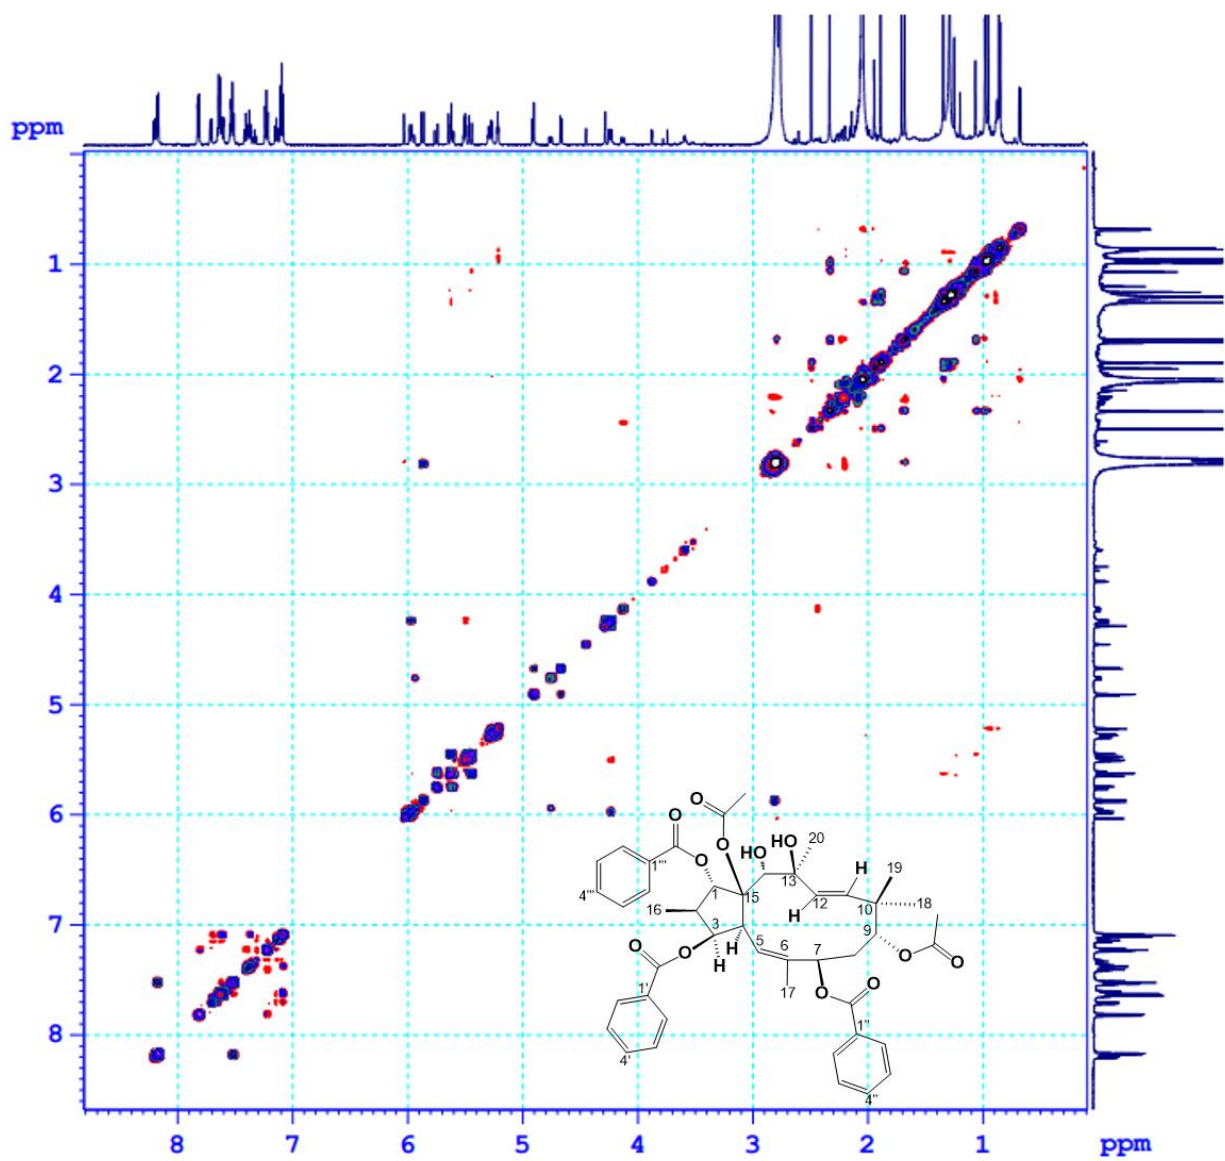



Figure S24. HSQC spectrum (total) of compound **P3** (Acetone- $d_6$ )

AS07 HSQC

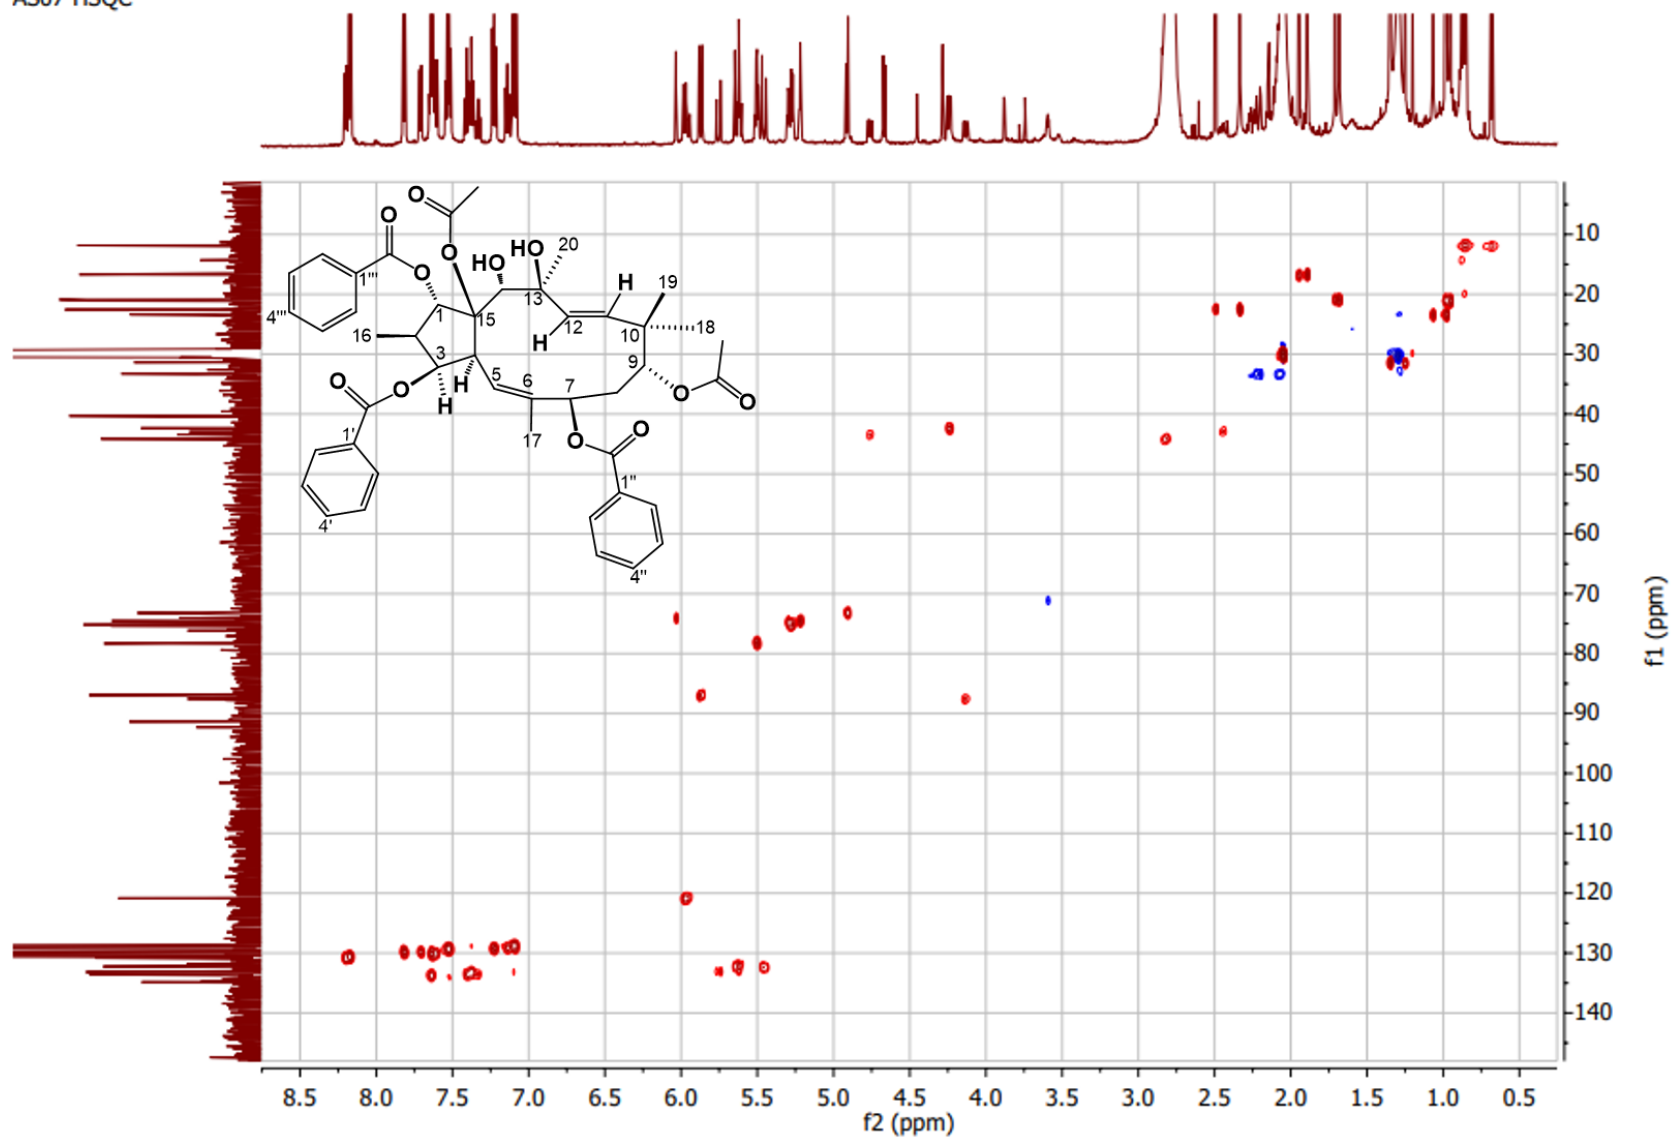

Figure S25. HSQC spectrum (sketched) of compound **P3** (Acetone- $d_6$ )

AS07 HSQC

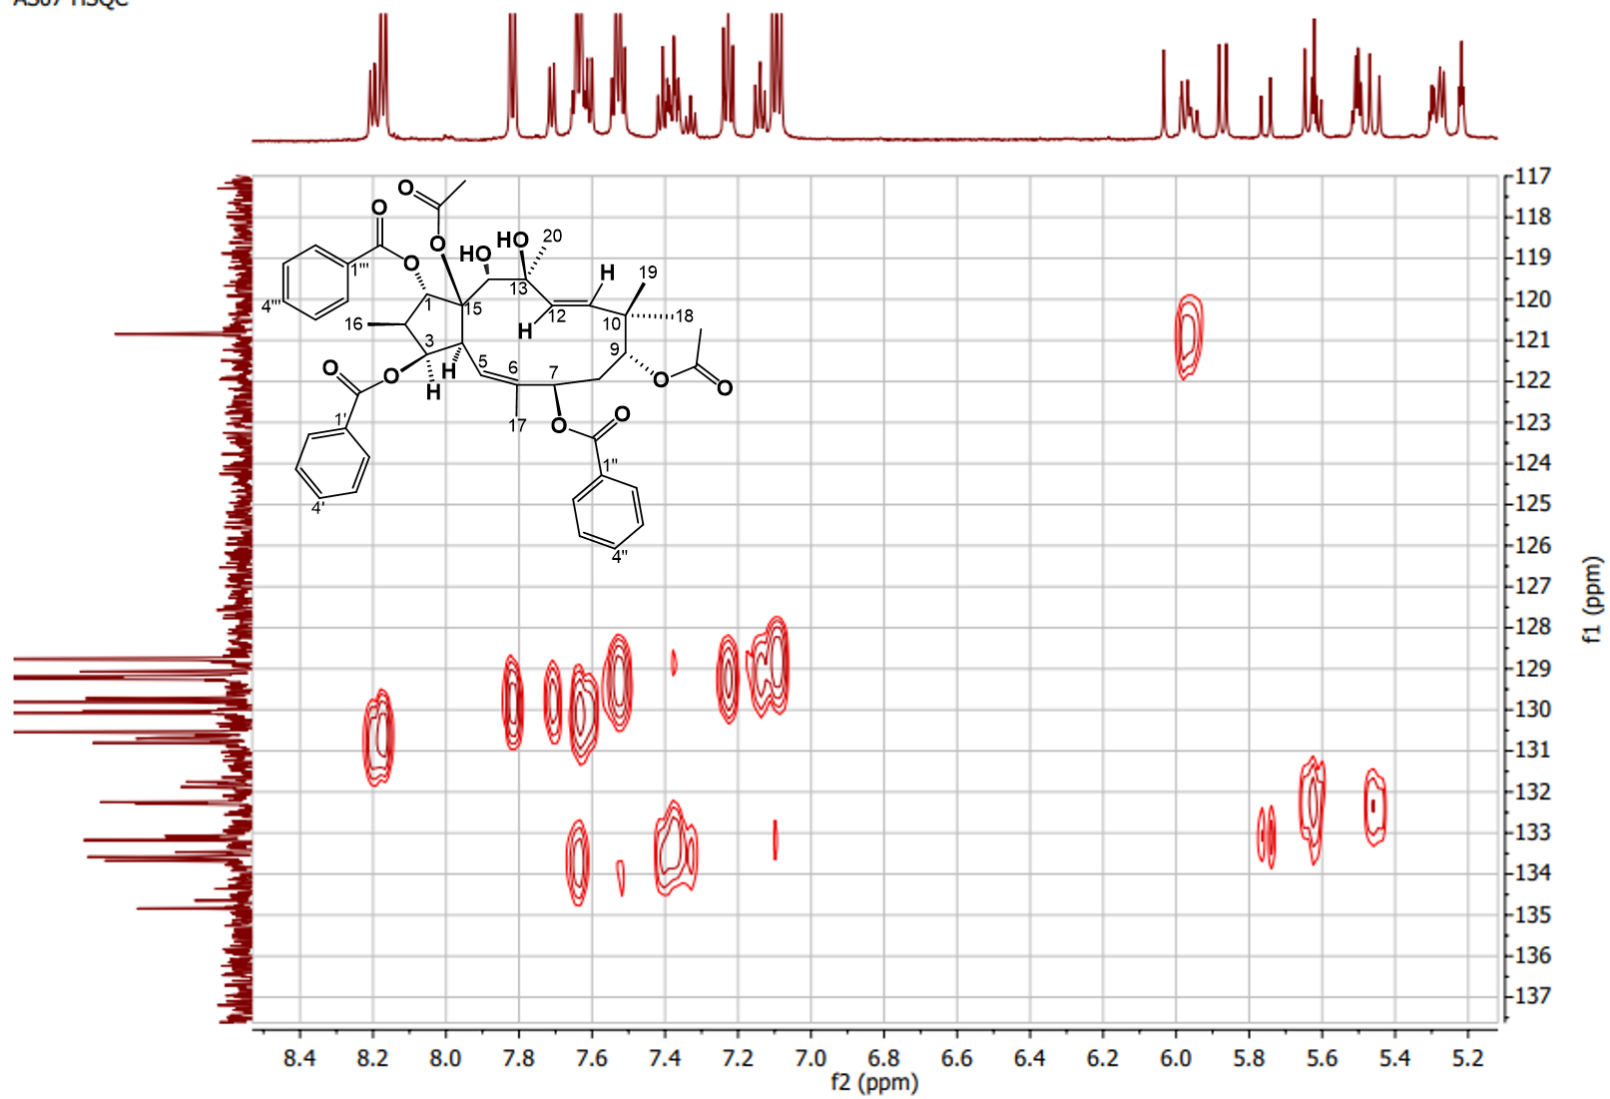

Figure S26. HMBC spectrum (total) of compound **P3** (Acetone- $d_6$ )

AS07 HMBC

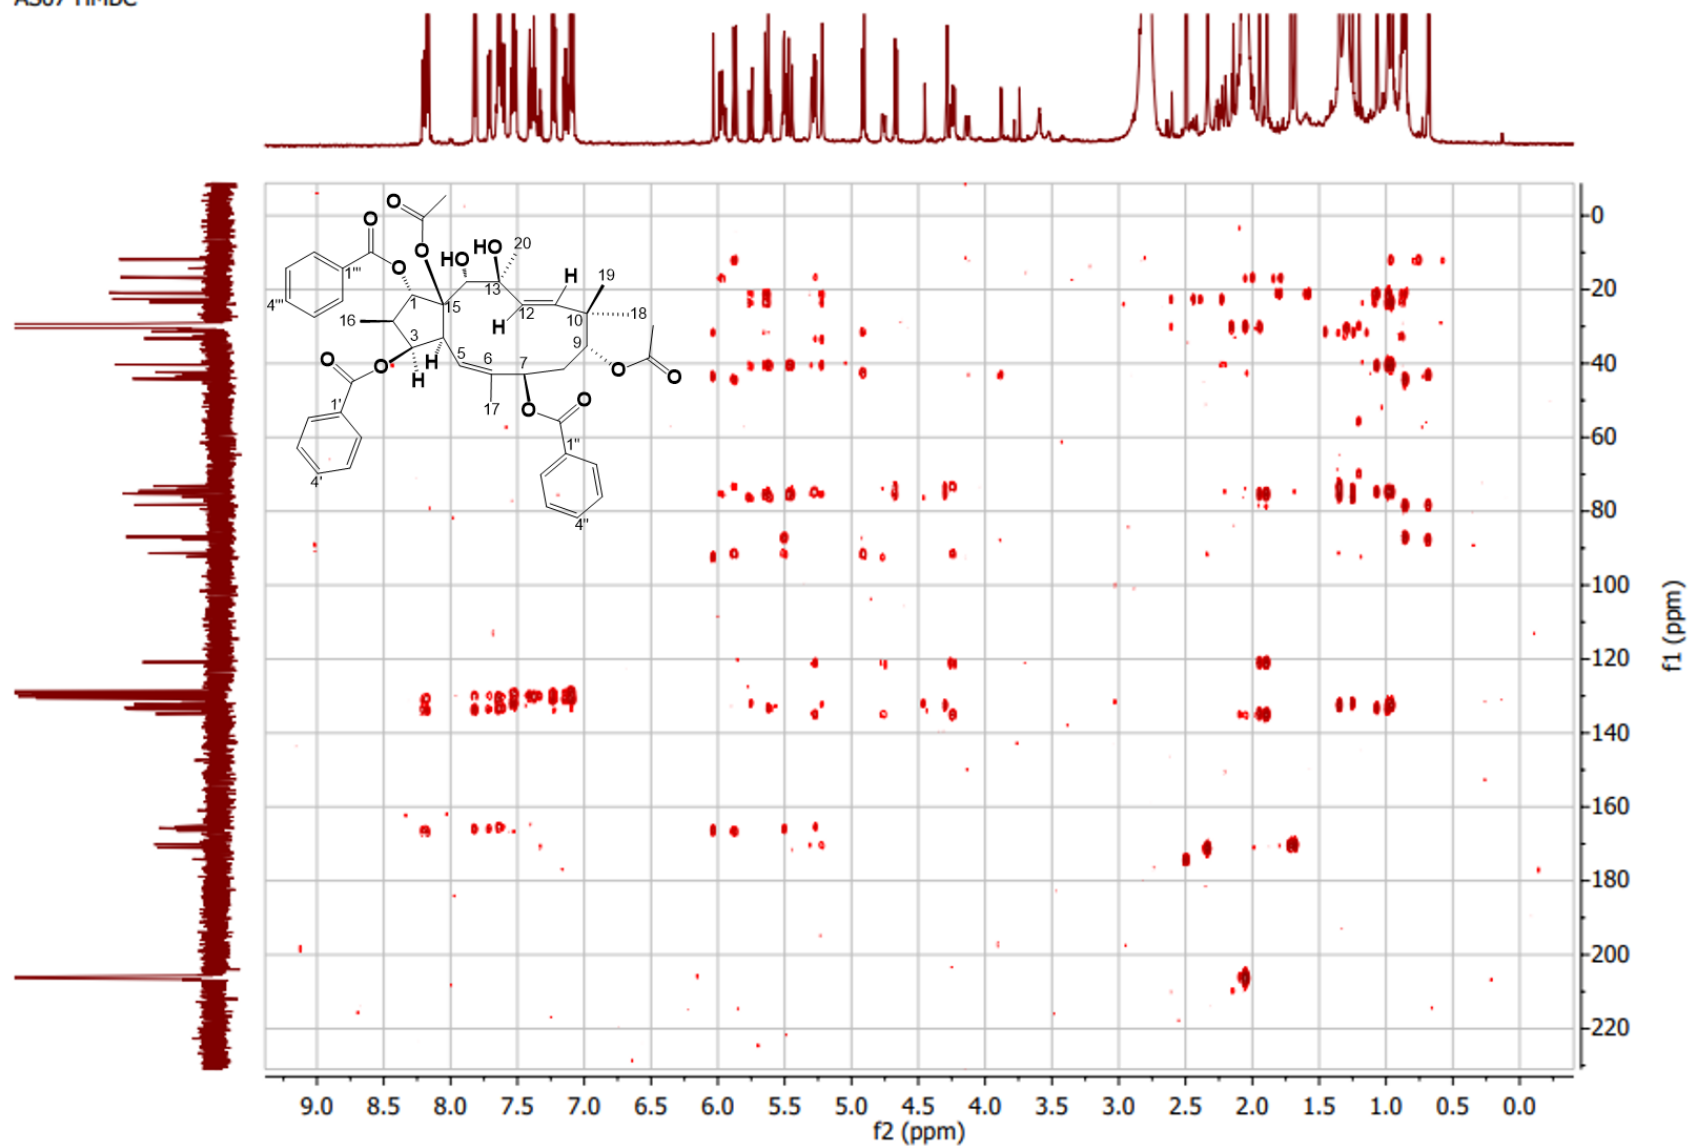

Figure S27. HMBC spectrum (sketched) of compound P3 (Acetone- $d_6$ )

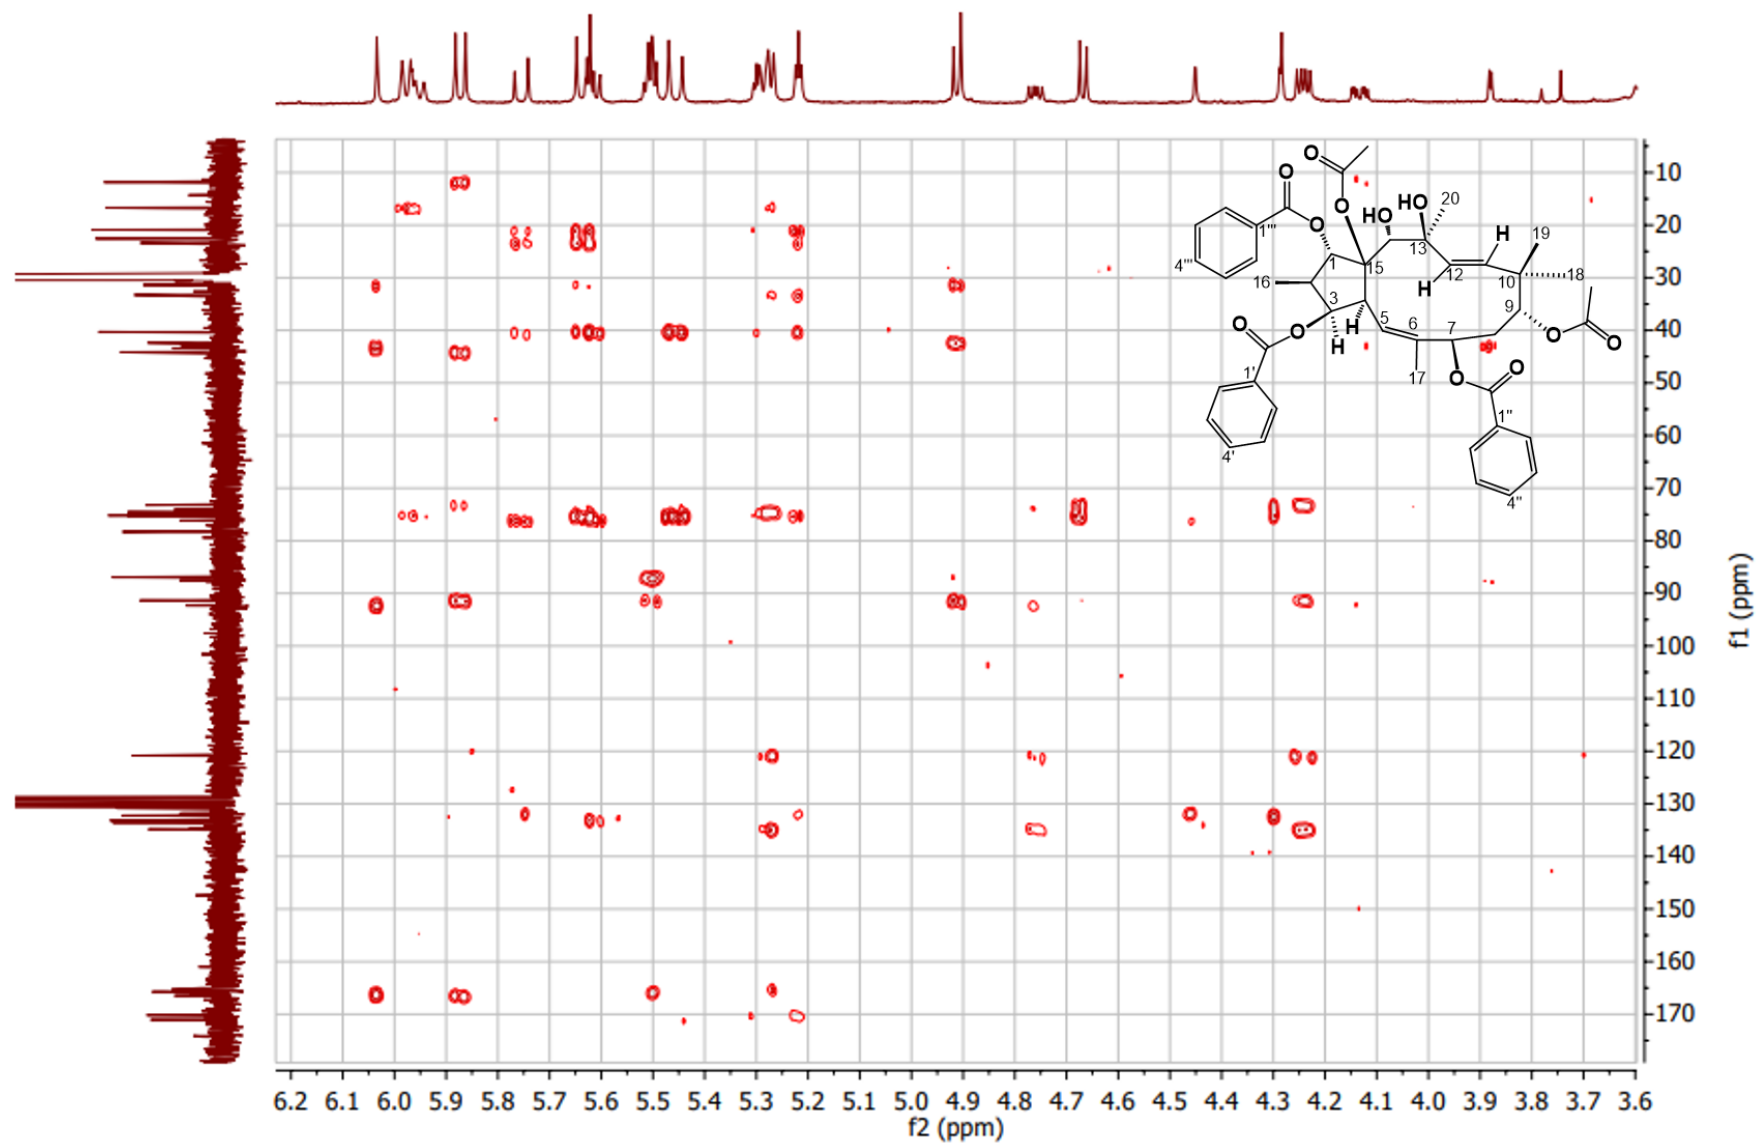

Figure S28. HMBC spectrum (sketched) of compound P3 (Acetone- $d_6$ )

AS07 HMBC

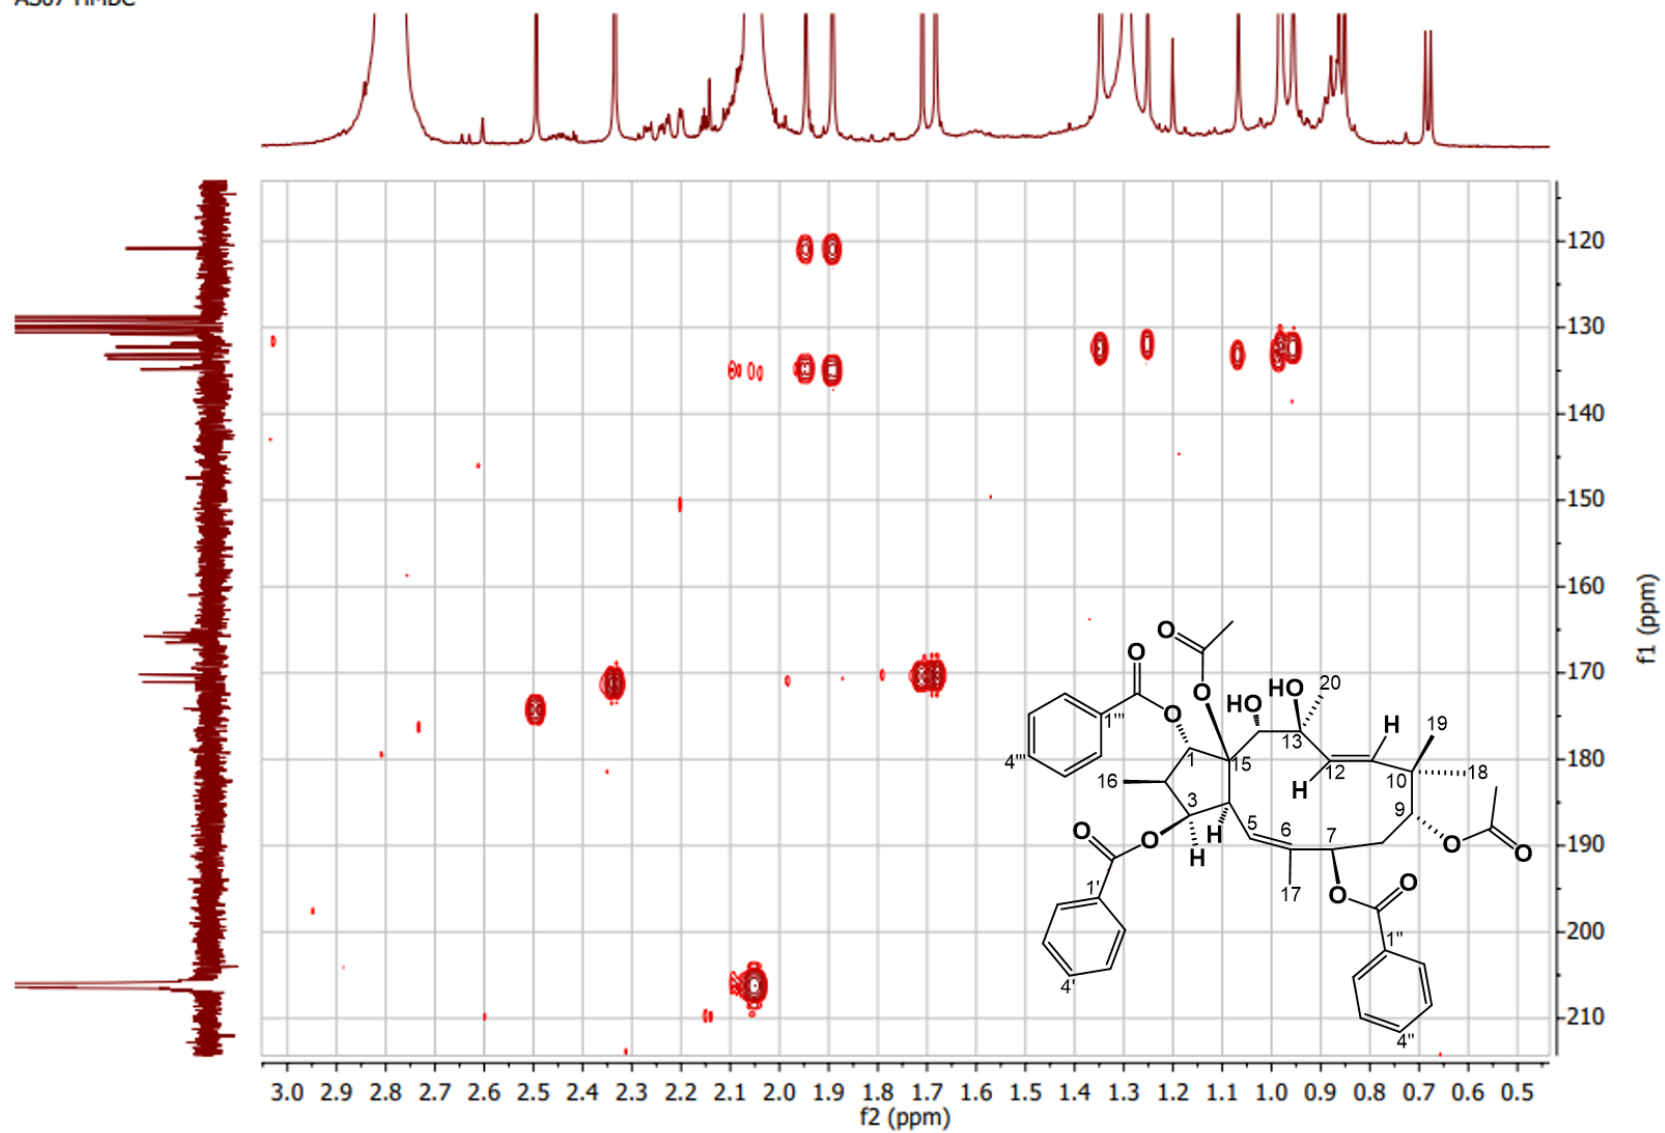

Figure S29. HMBC spectrum (sketched) of compound P3 (Acetone- $d_6$ )

AS07 HMBC

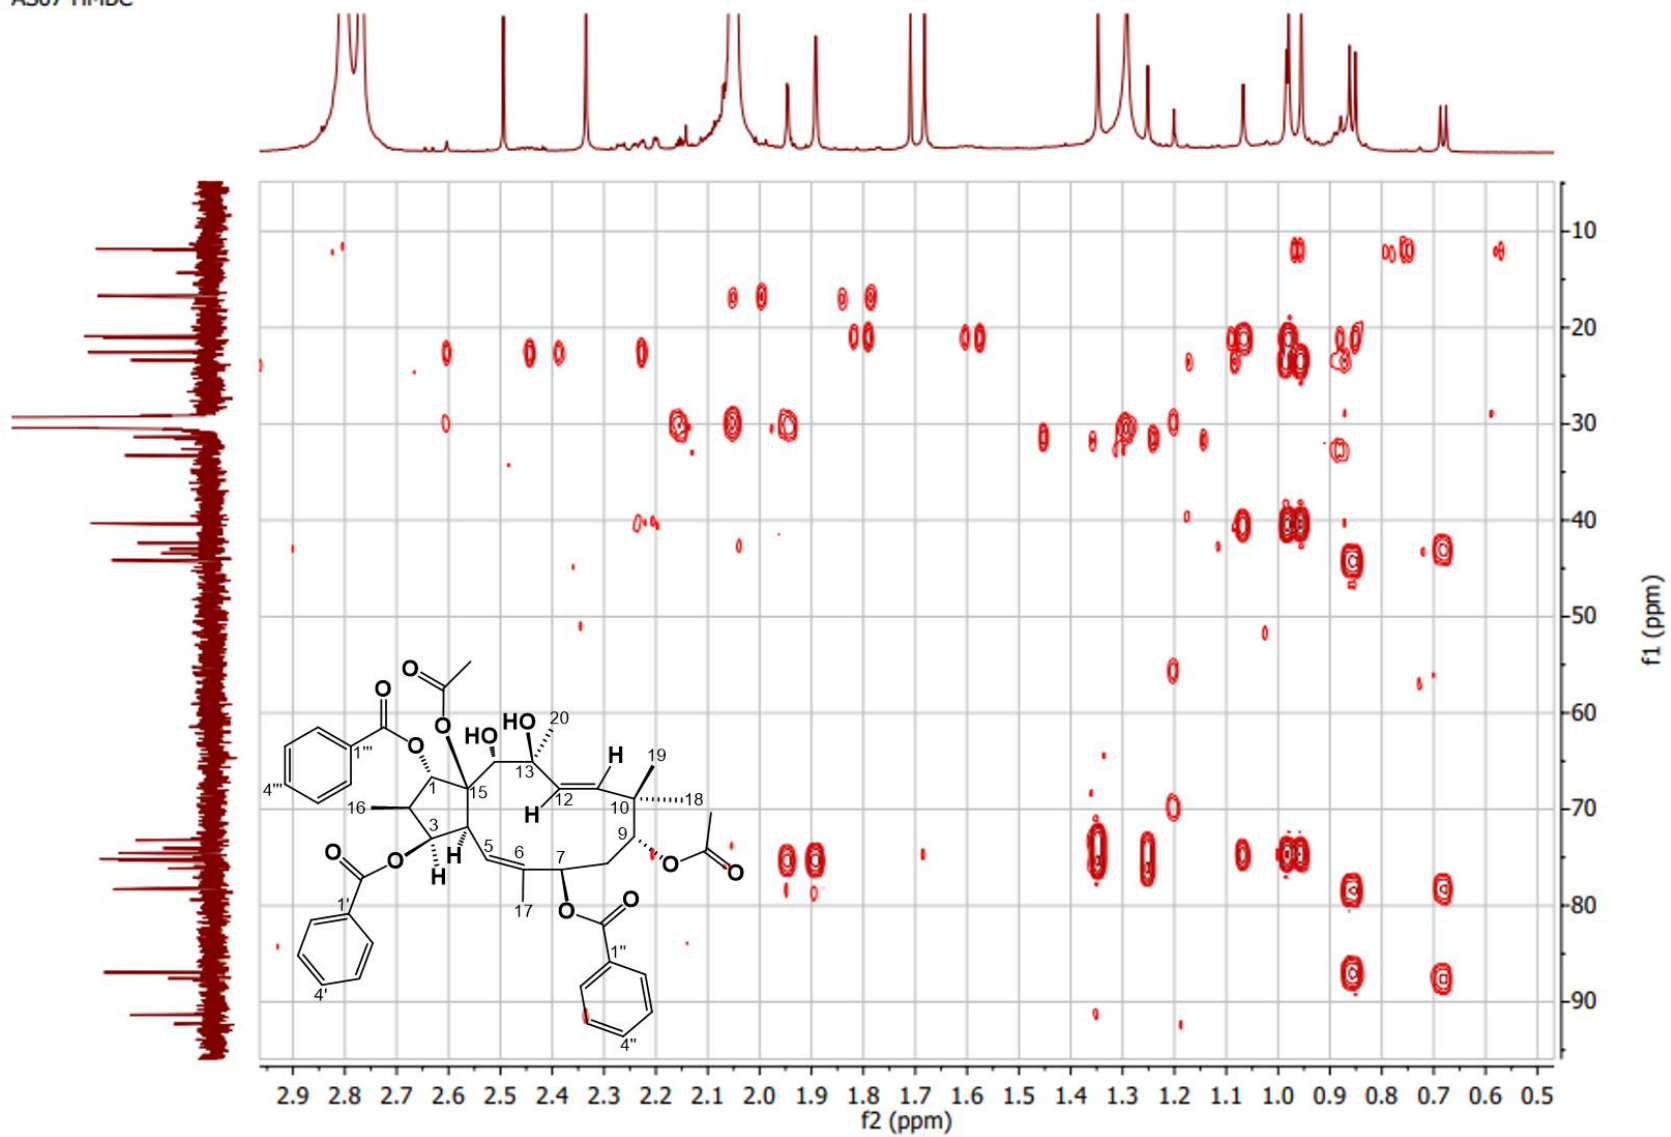

Figure S30. NOESY spectrum of compound **P3** (Acetone- $d_6$ )

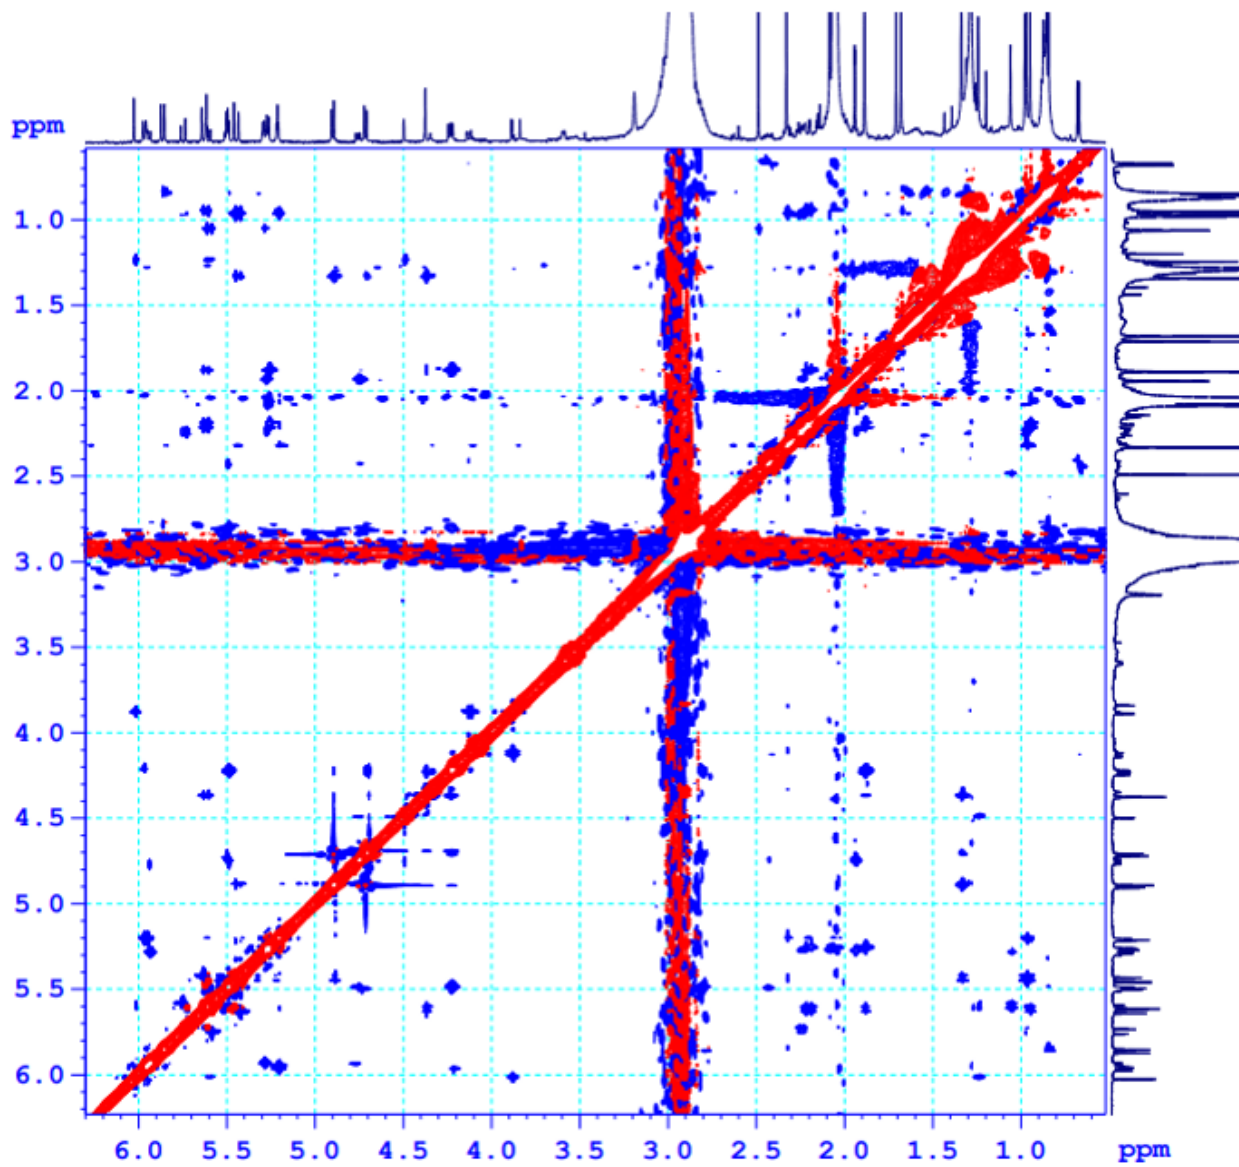

Figure S31. NOESY spectrum (sketched) of compound P3 (Acetone- $d_6$ )

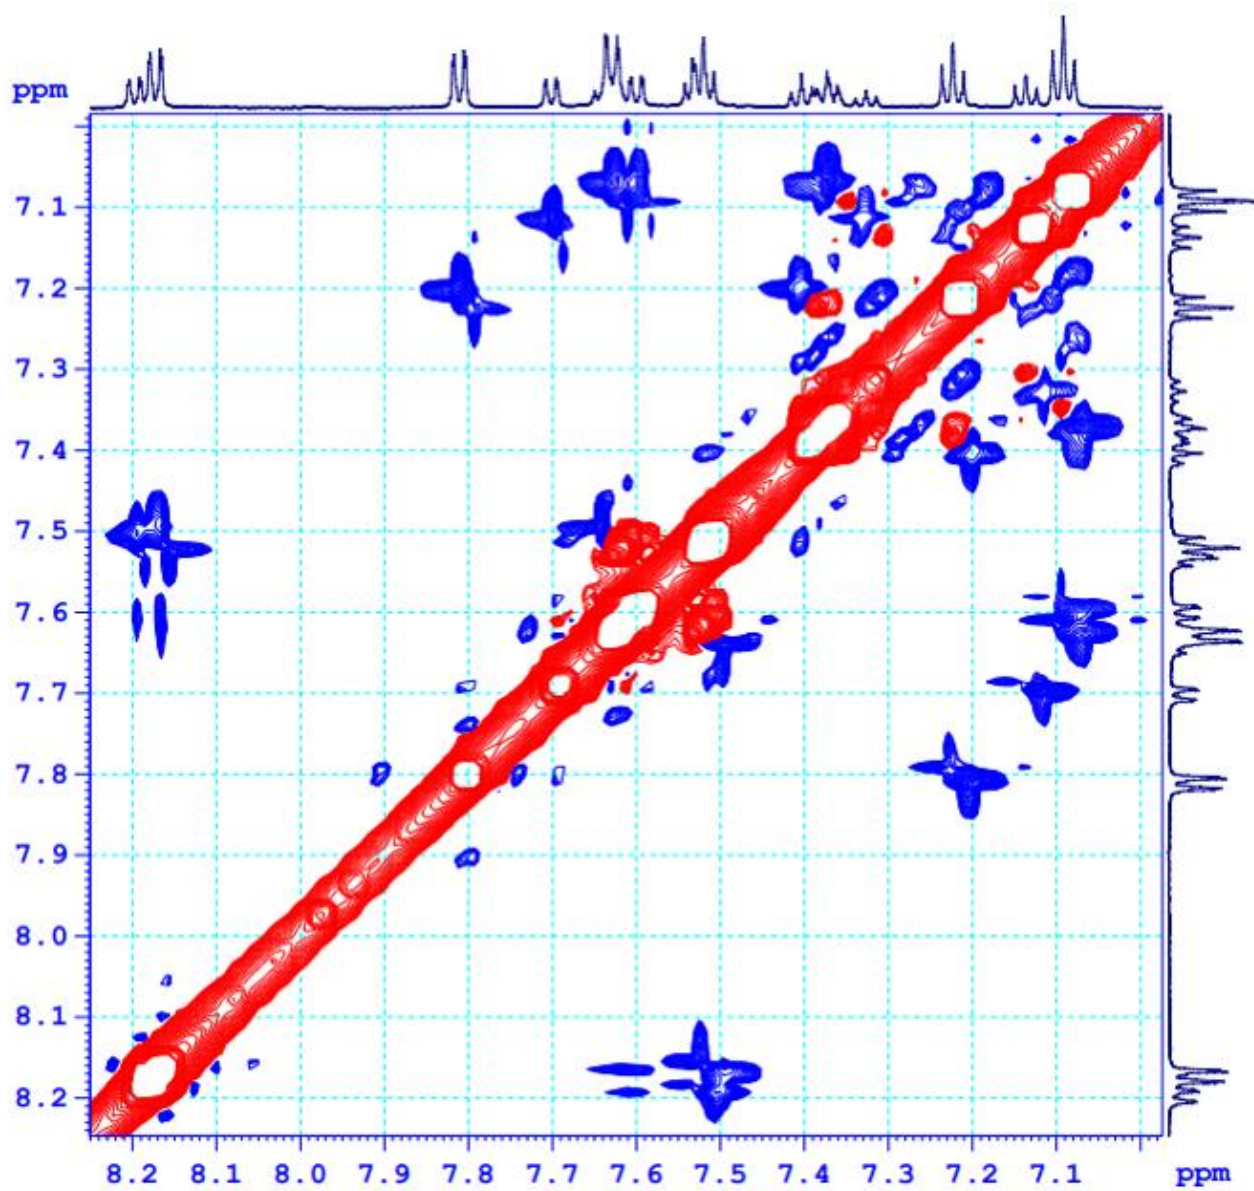



Figure S32. NOESY spectrum (sketched) of compound P3 (Acetone- $d_6$ )

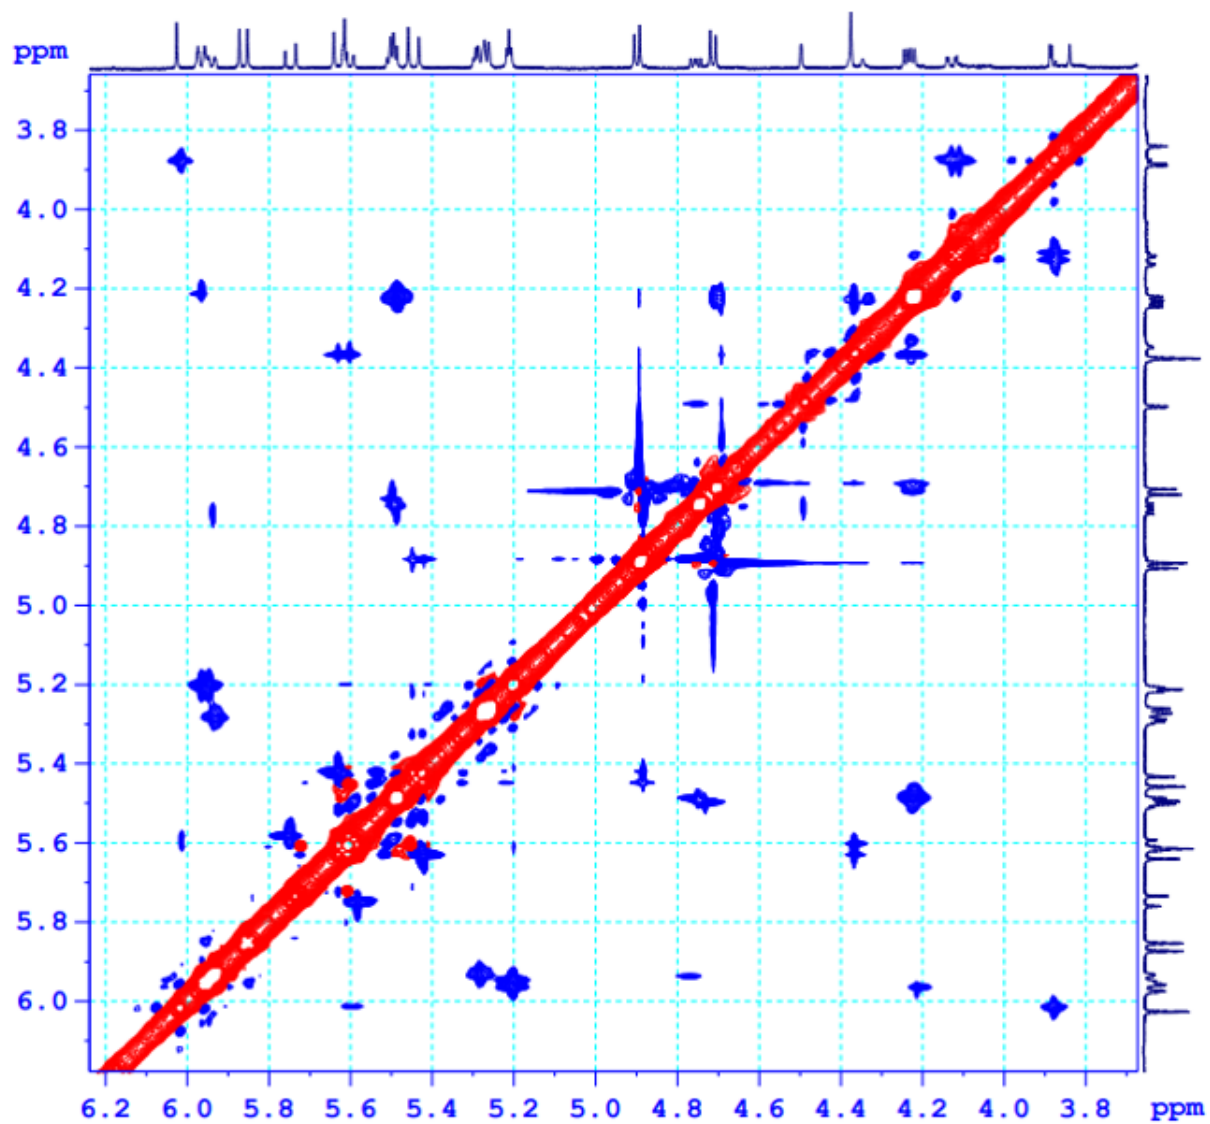

Figure S33. MS spectrum of compound **P3** (Acetone- $d_6$ )

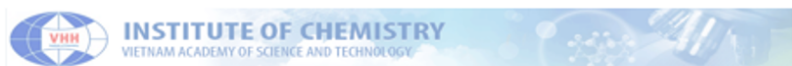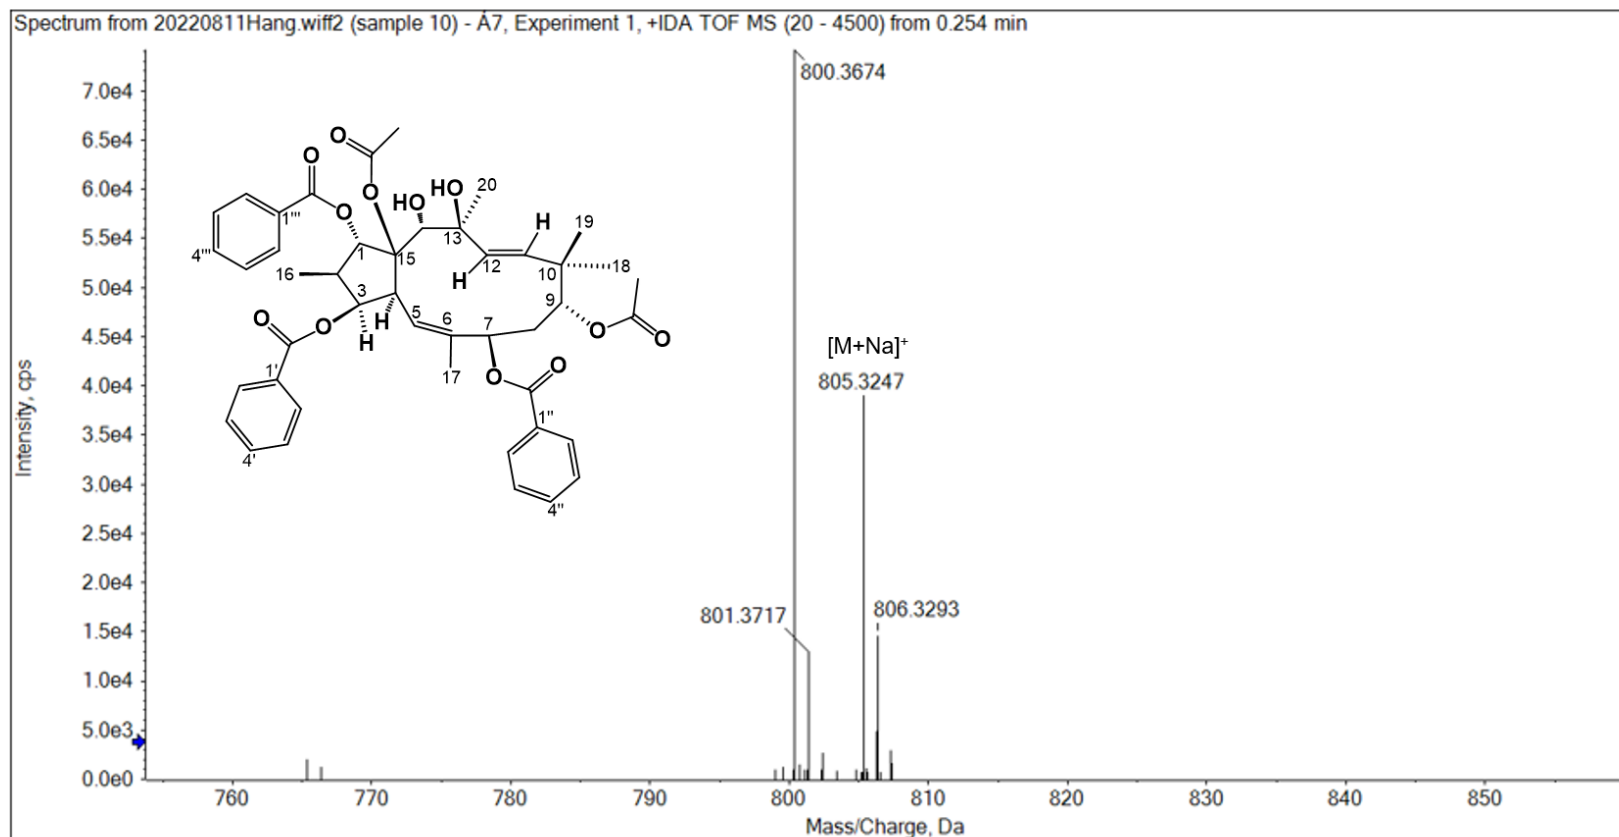

Figure S34. <sup>1</sup>H-NMR (600 MHz) spectrum of compound P4 (CDCl<sub>3</sub>)

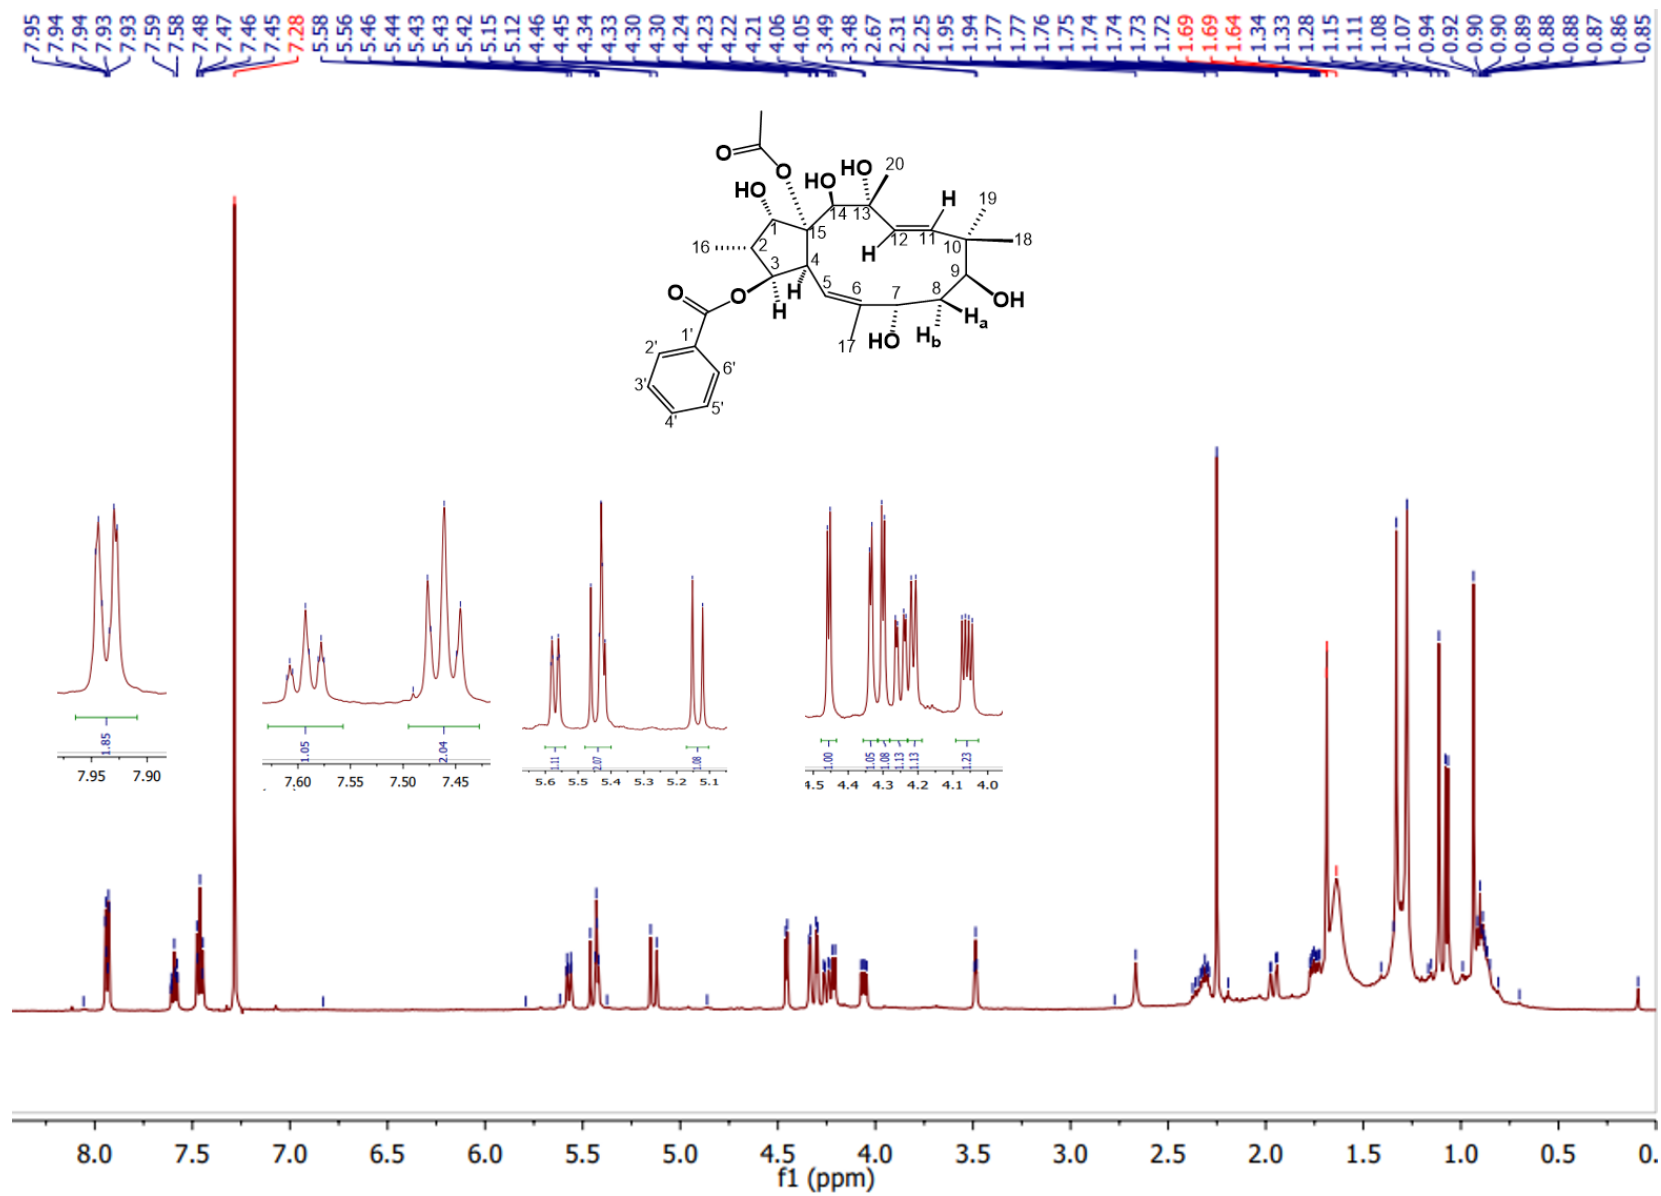

Figure S35.  $^{13}\text{C}$ -NMR (125 MHz) spectrum of compound **P4** ( $\text{CDCl}_3$ )

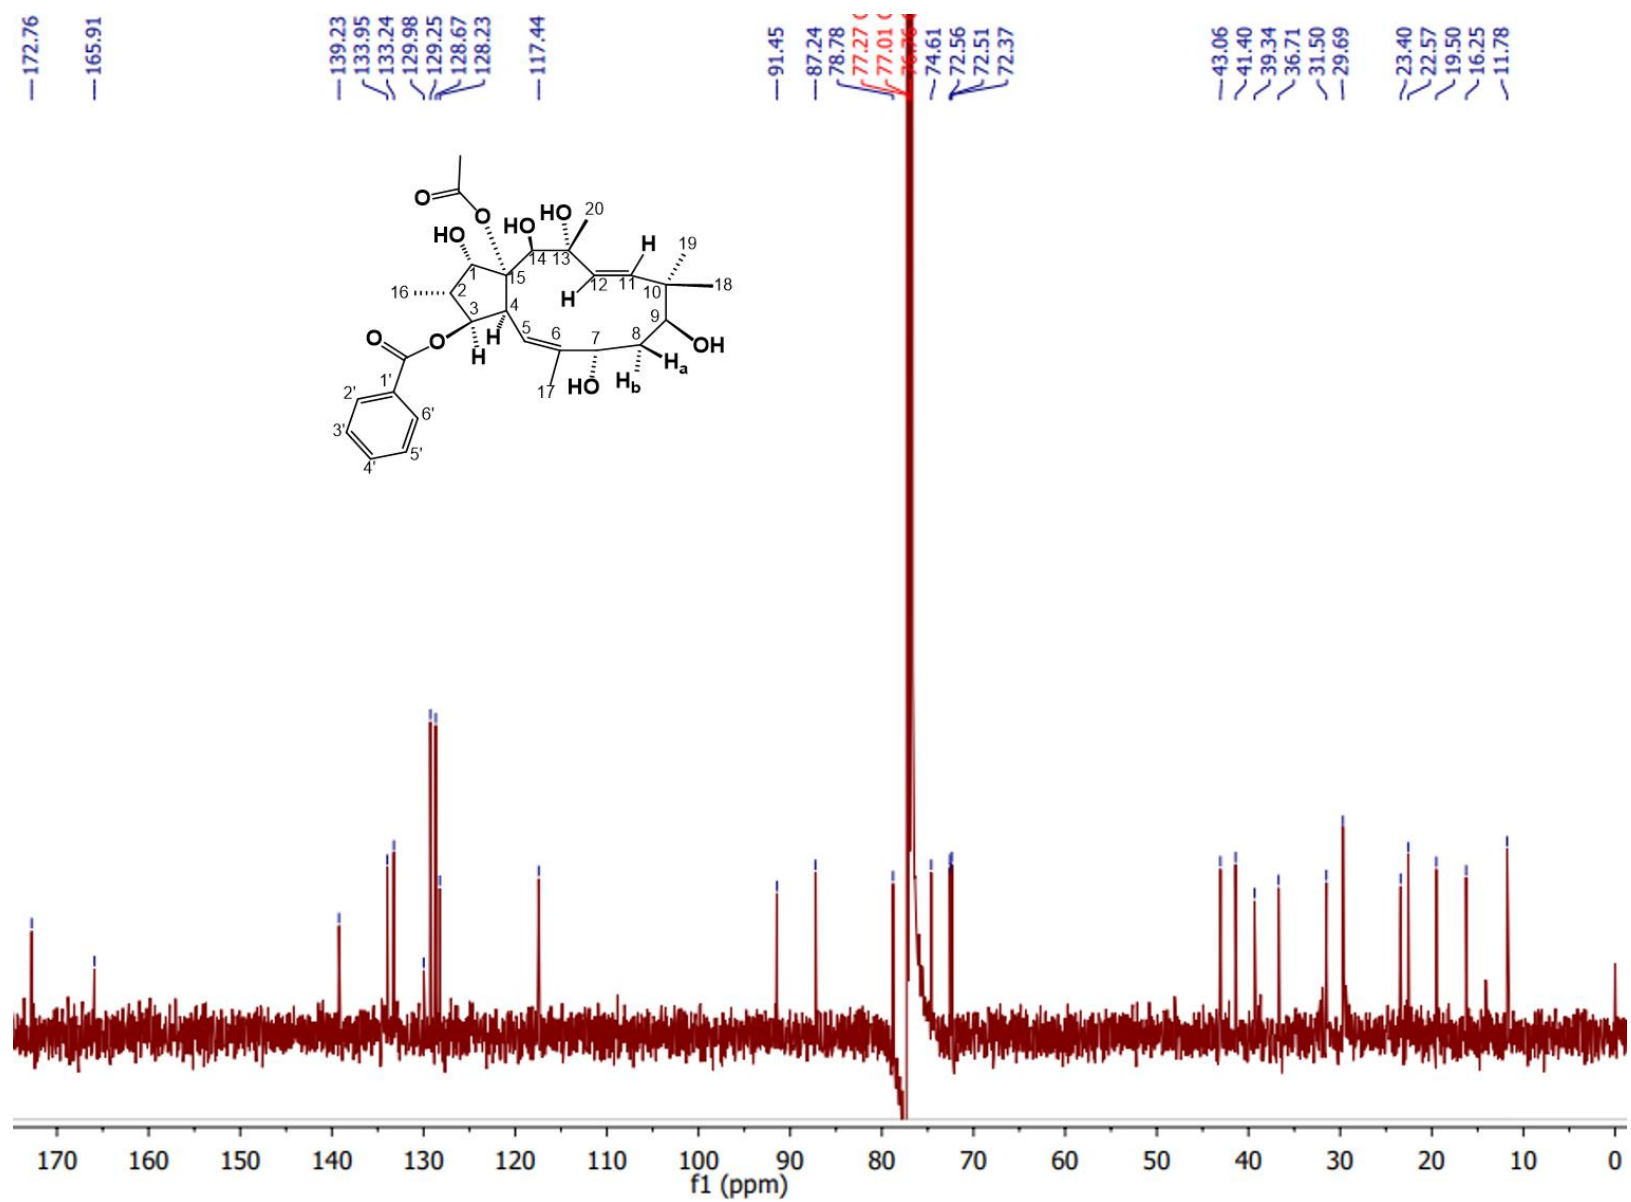

Figure S36. COSY spectrum of compound P4 (CDCl<sub>3</sub>)

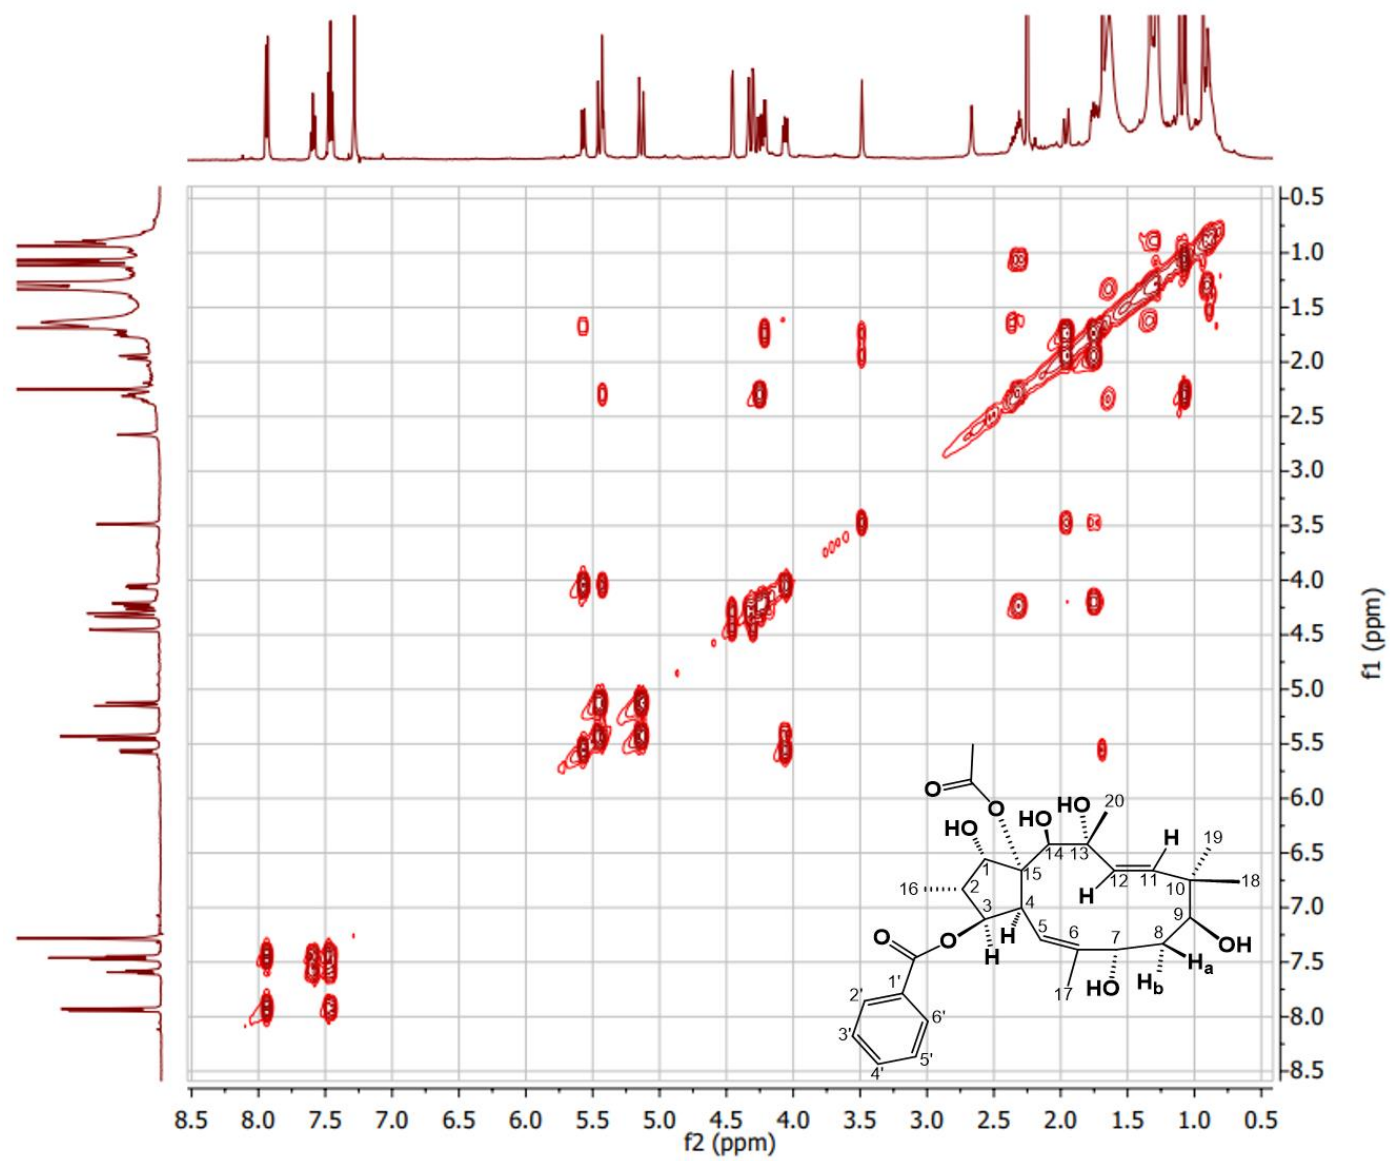

Figure S37. HSQC spectrum of compound P4 (CDCl<sub>3</sub>)

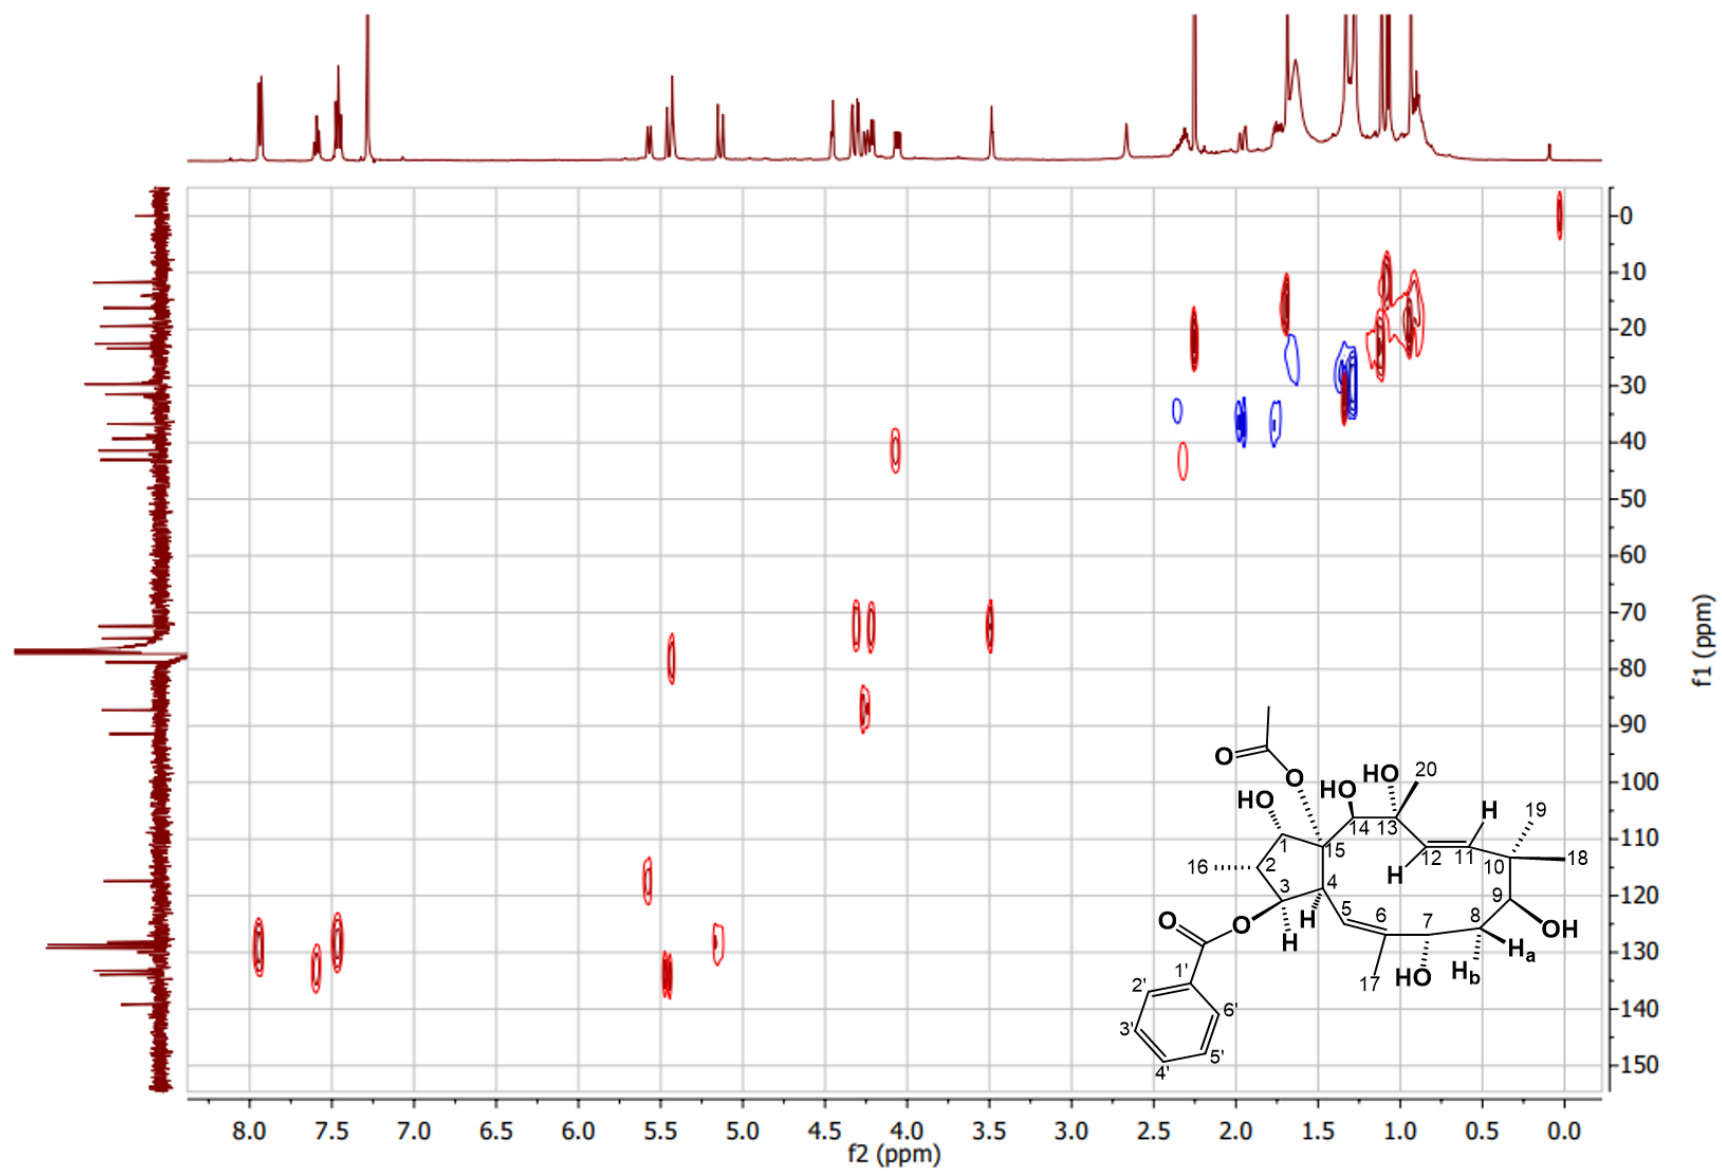

Figure S38. HMBC spectrum (total) of compound **P4** (CDCl<sub>3</sub>)

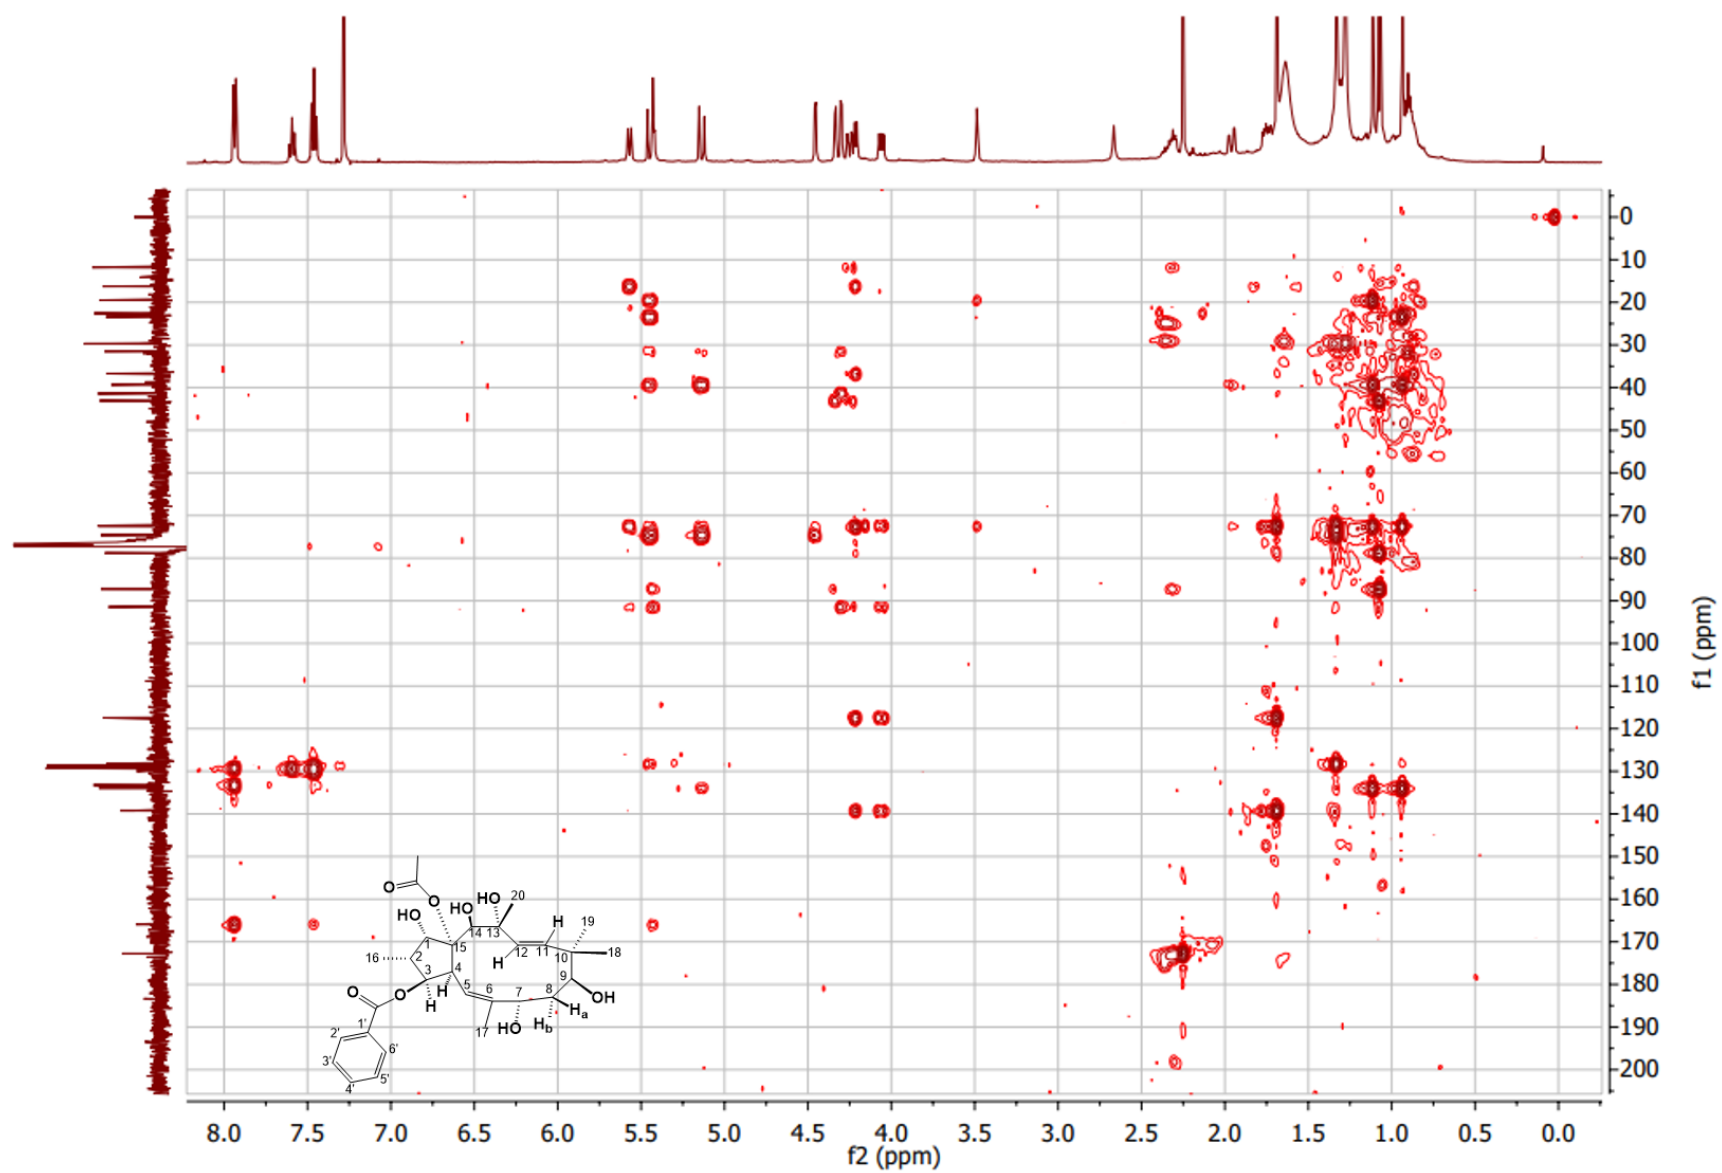

Figure S39. HMBC spectrum (sketched) of compound P4 (CDCl<sub>3</sub>)

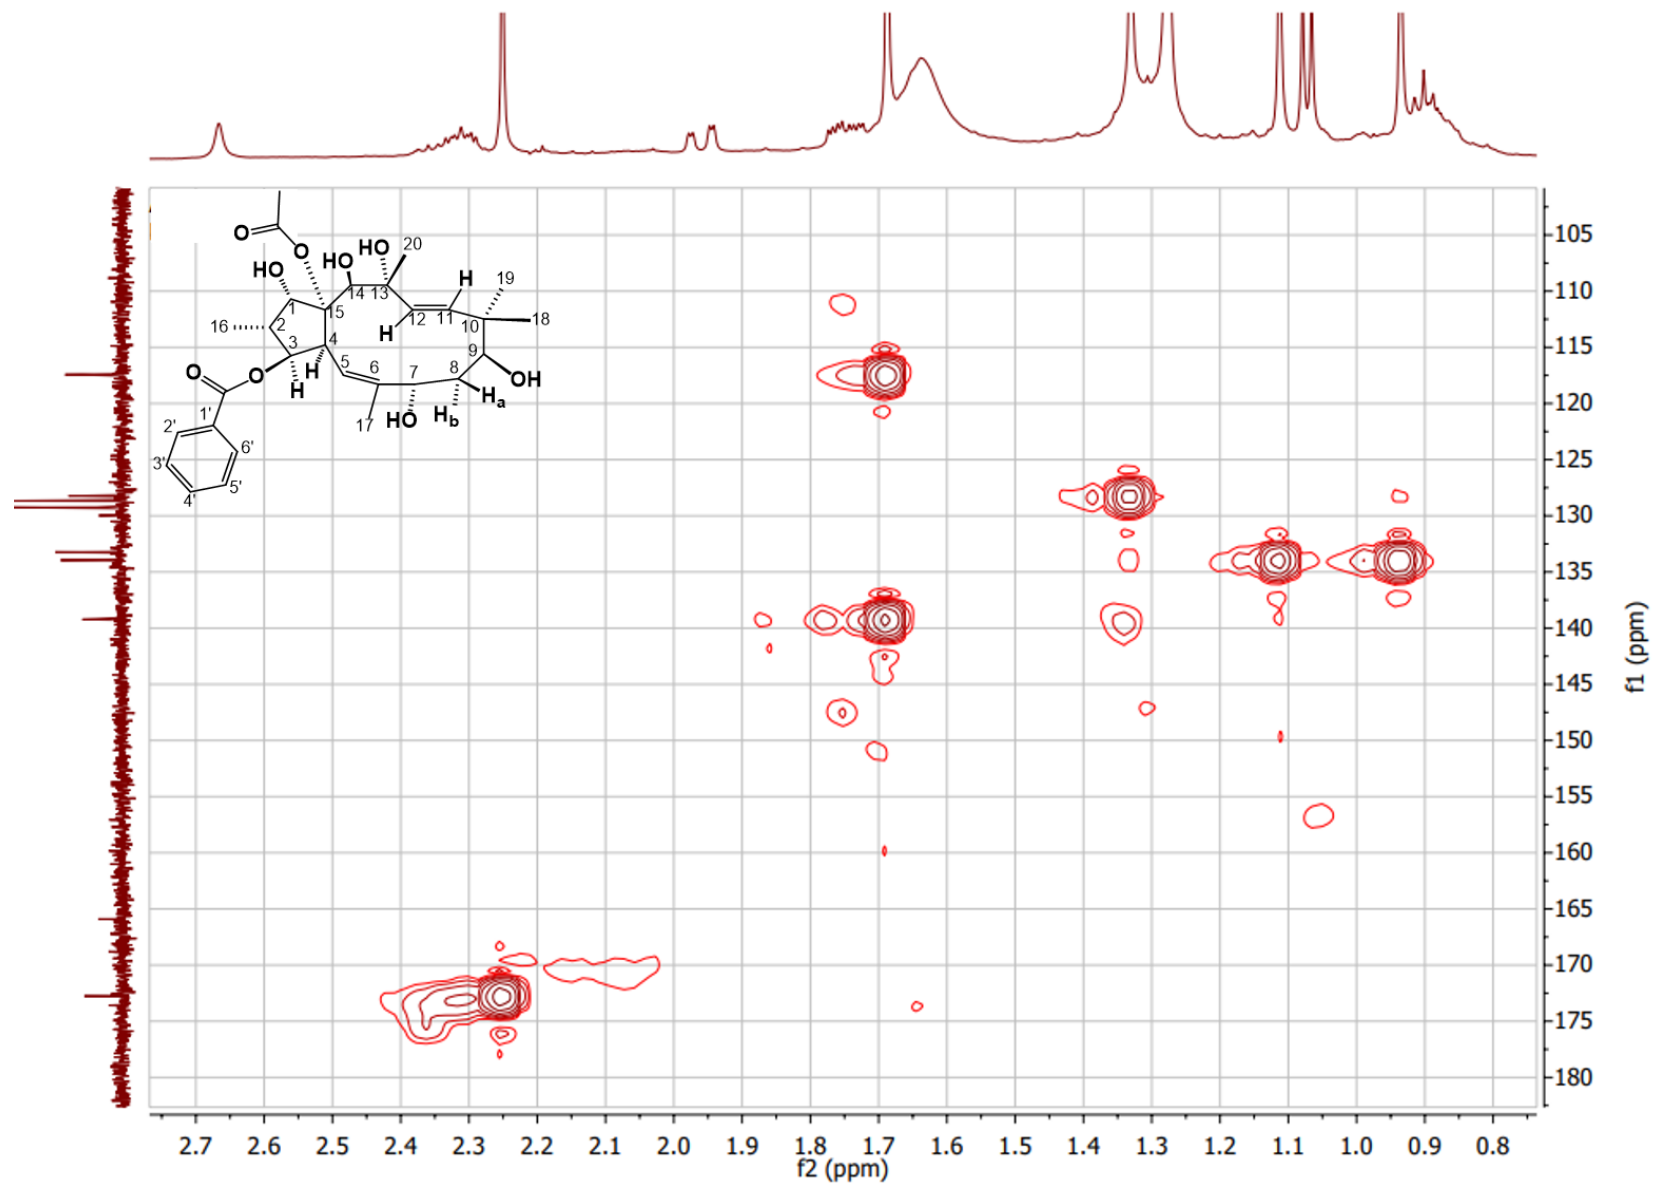



Figure S40. NOESY spectrum of compound **P4** (CDCl<sub>3</sub>)

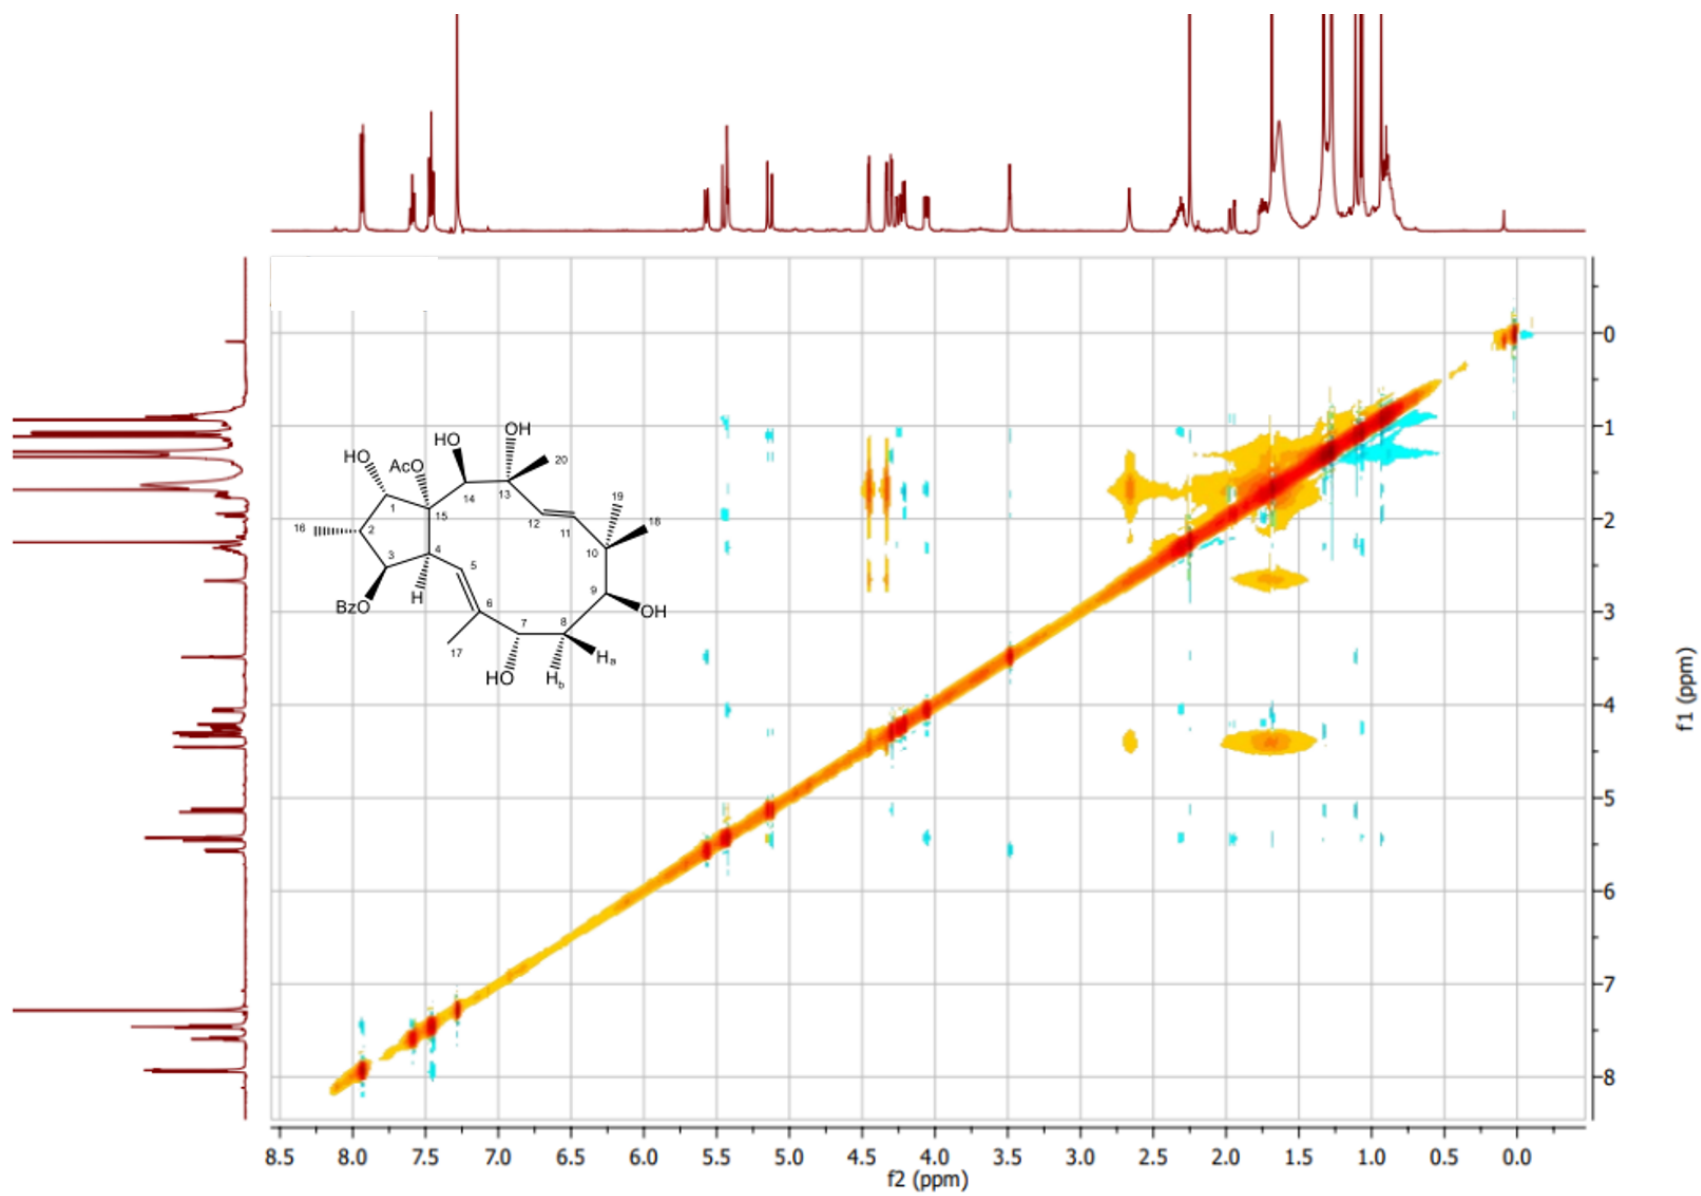

Figure S41. MS spectrum (CDCl<sub>3</sub>) and structural novelty check for compound P4

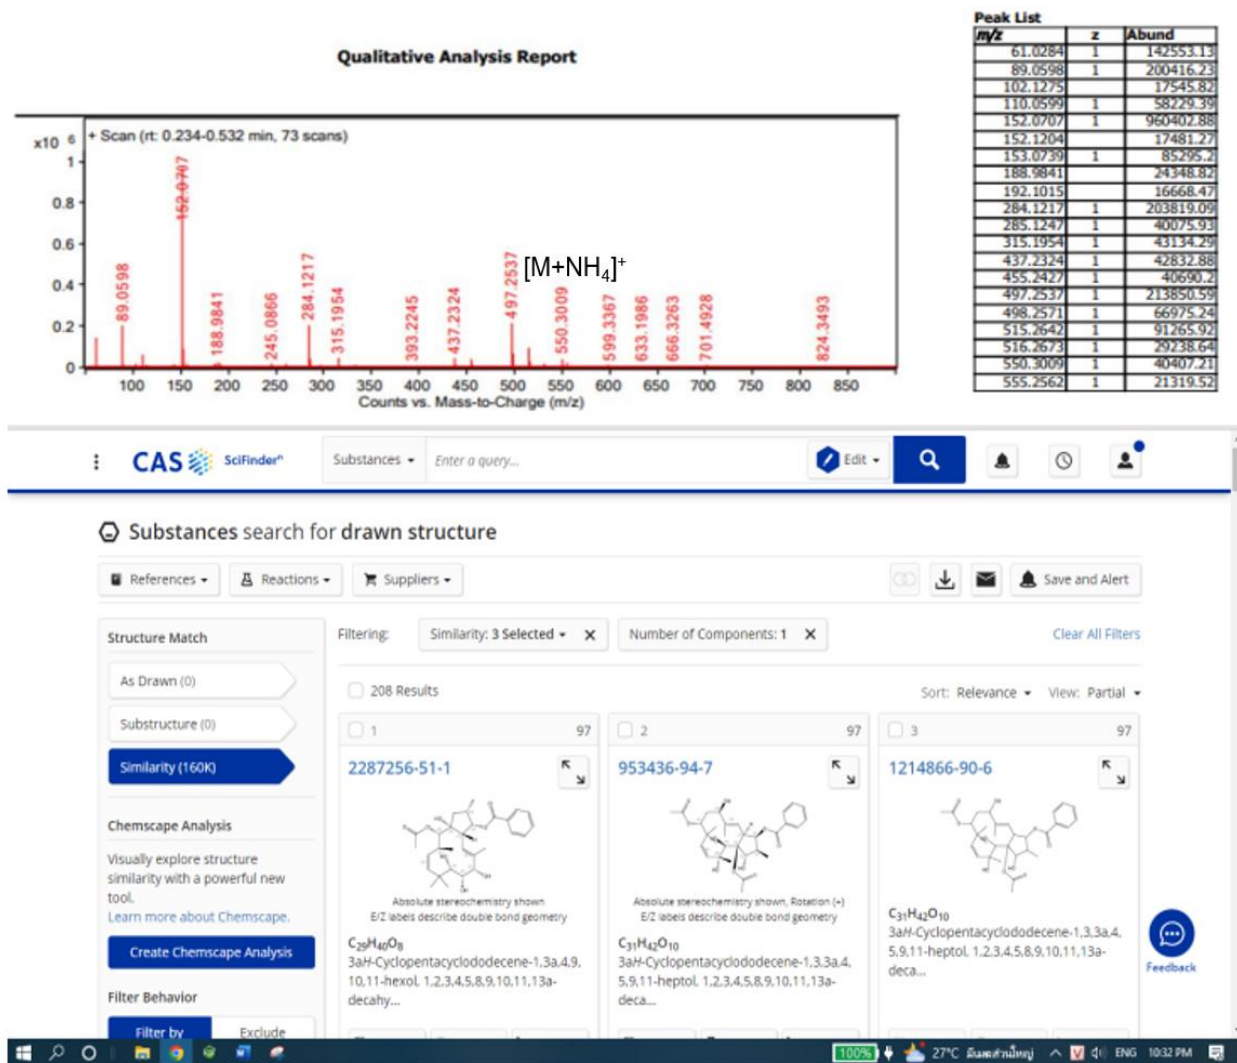

**Substances**  
10:31 PM

As Drawn (0)  
Substructure (0)  
Similarity (160K)

Rerun Search  
Edit Search

Figure S42. <sup>1</sup>H-NMR (600 MHz) spectrum of compound P5 (CDCl<sub>3</sub>)

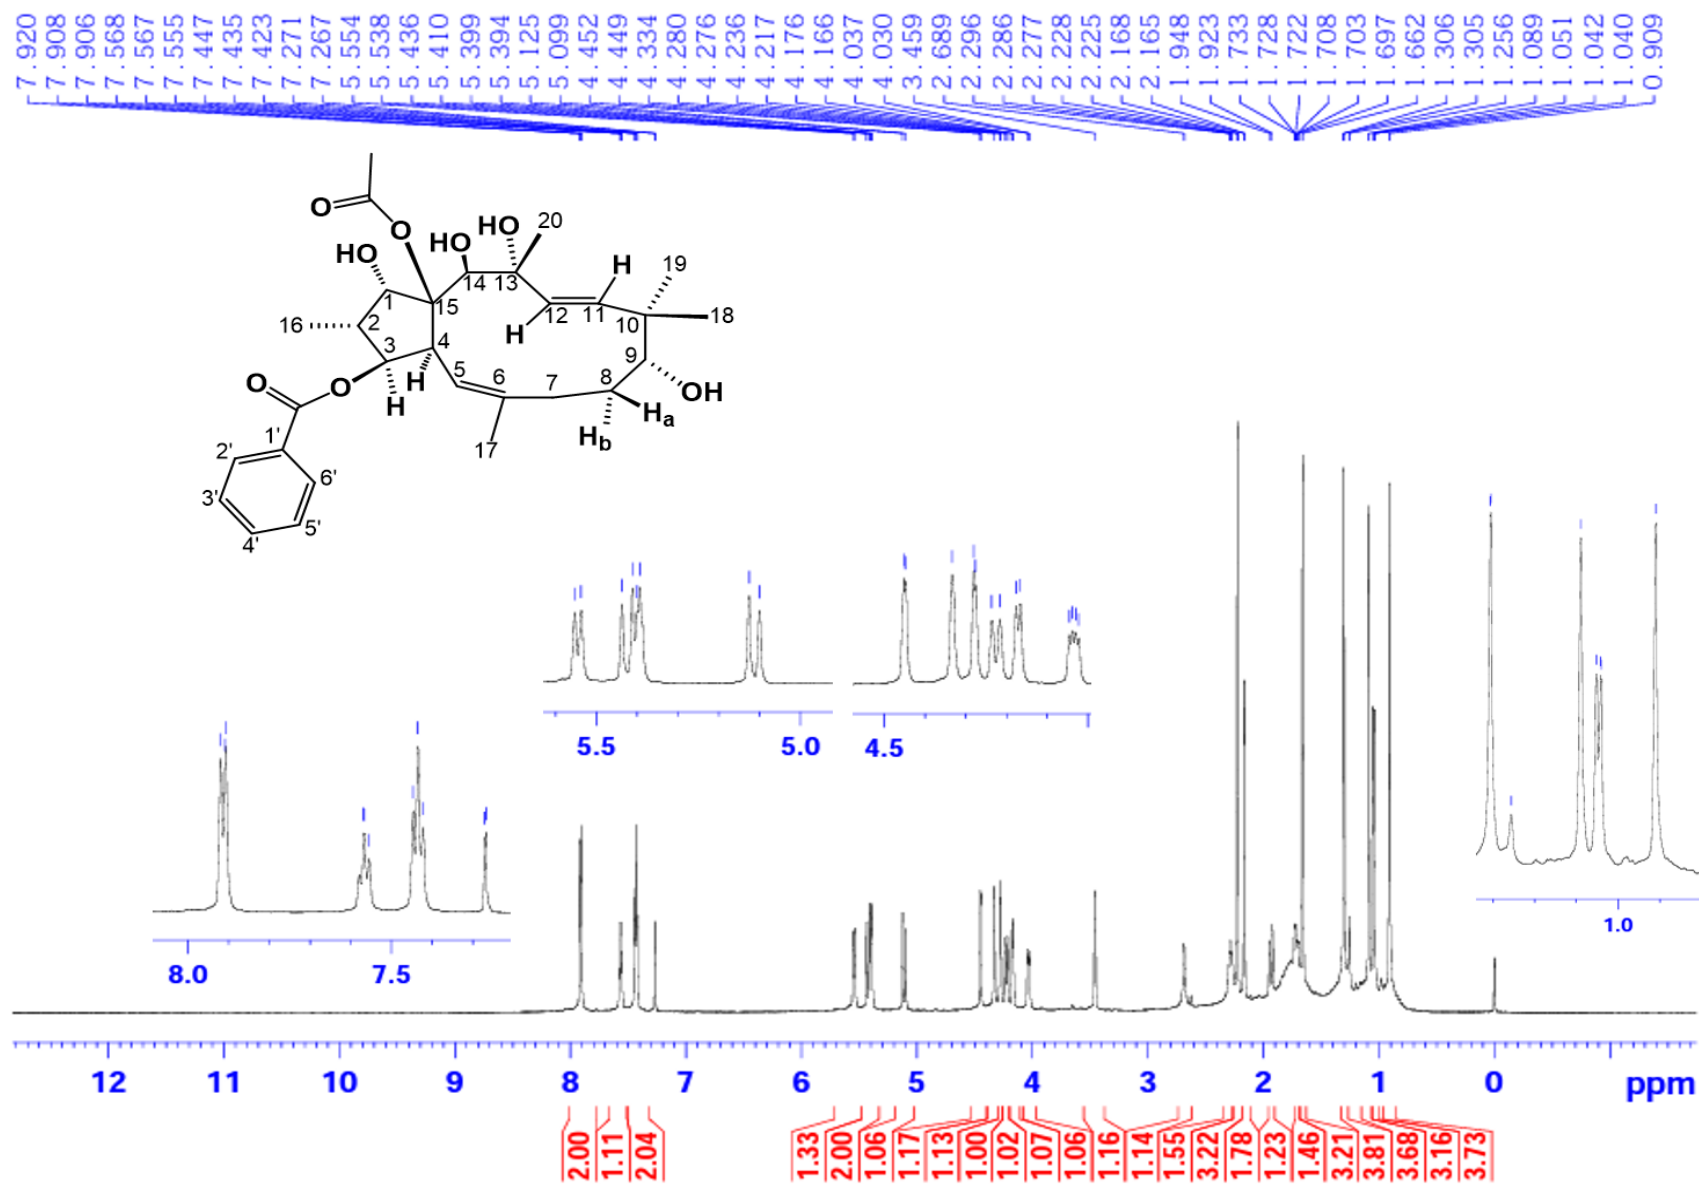

Figure S43.  $^{13}\text{C}$ -NMR (125 MHz) spectrum of compound **P5** ( $\text{CDCl}_3$ )

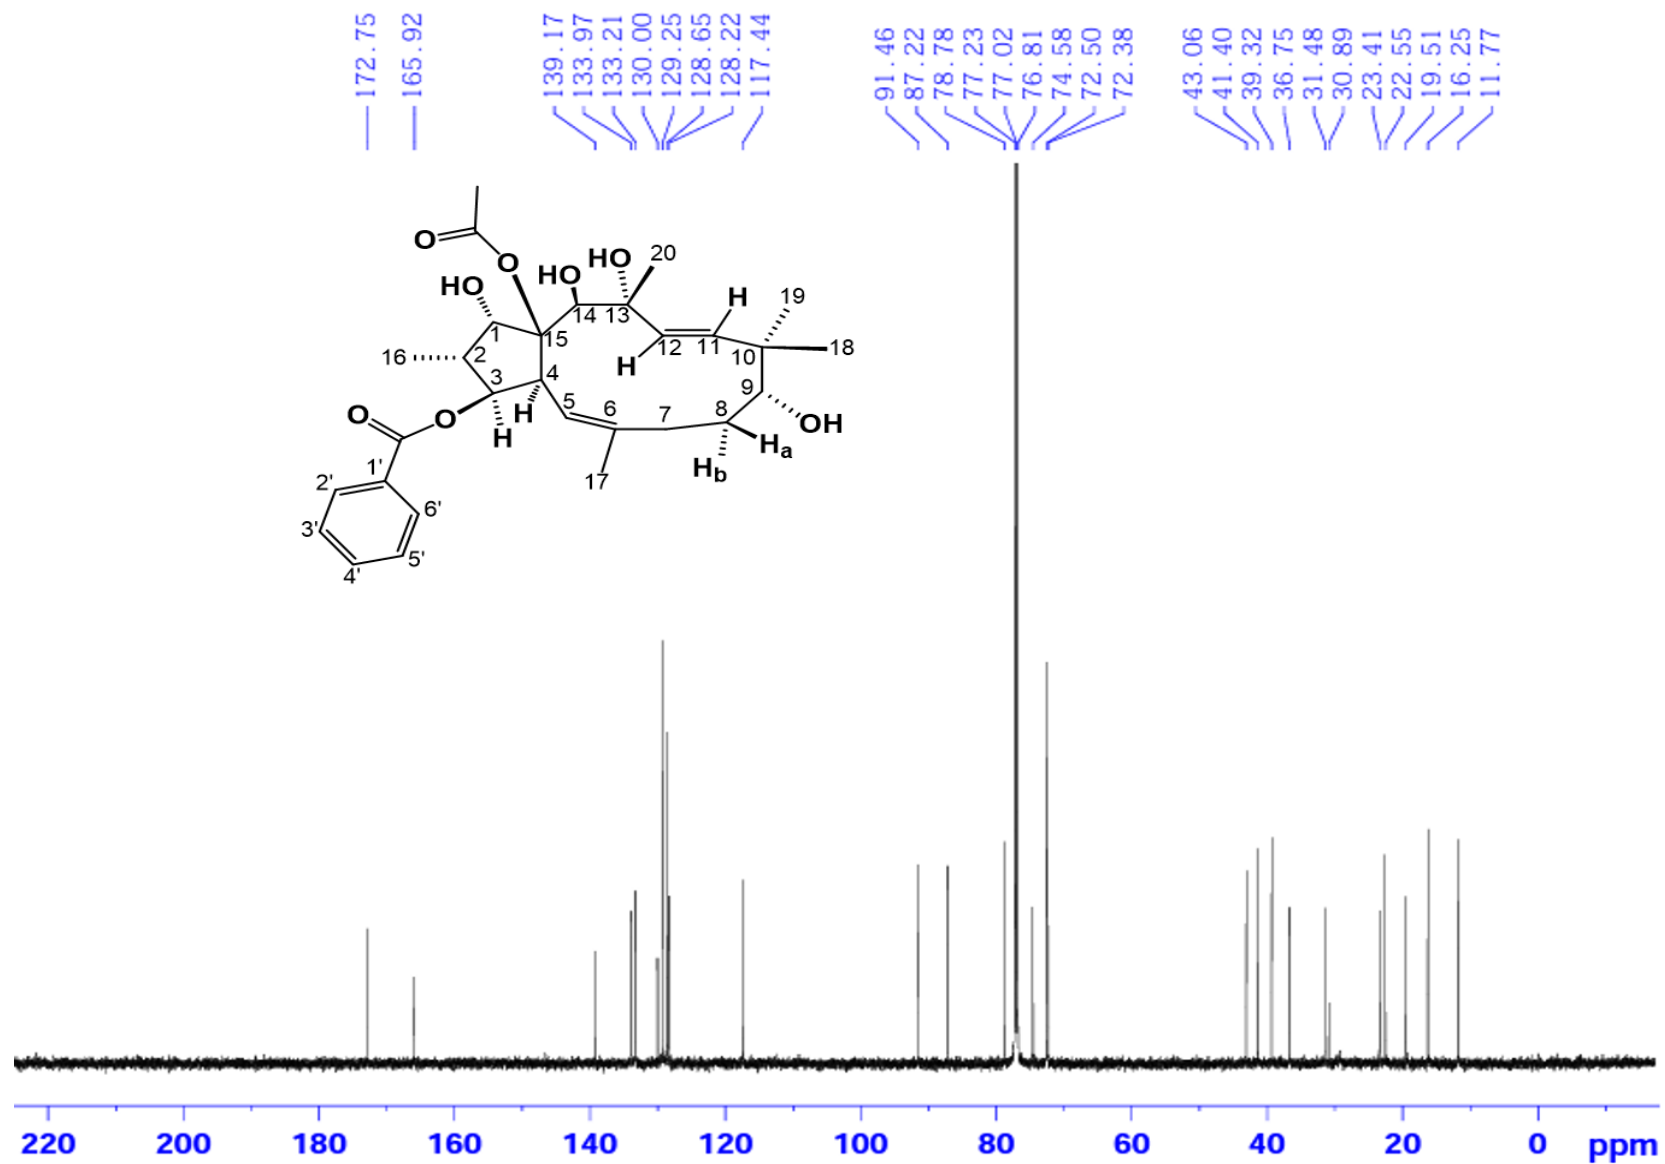

Figure S44. COSY spectrum of compound P5 (CDCl<sub>3</sub>)

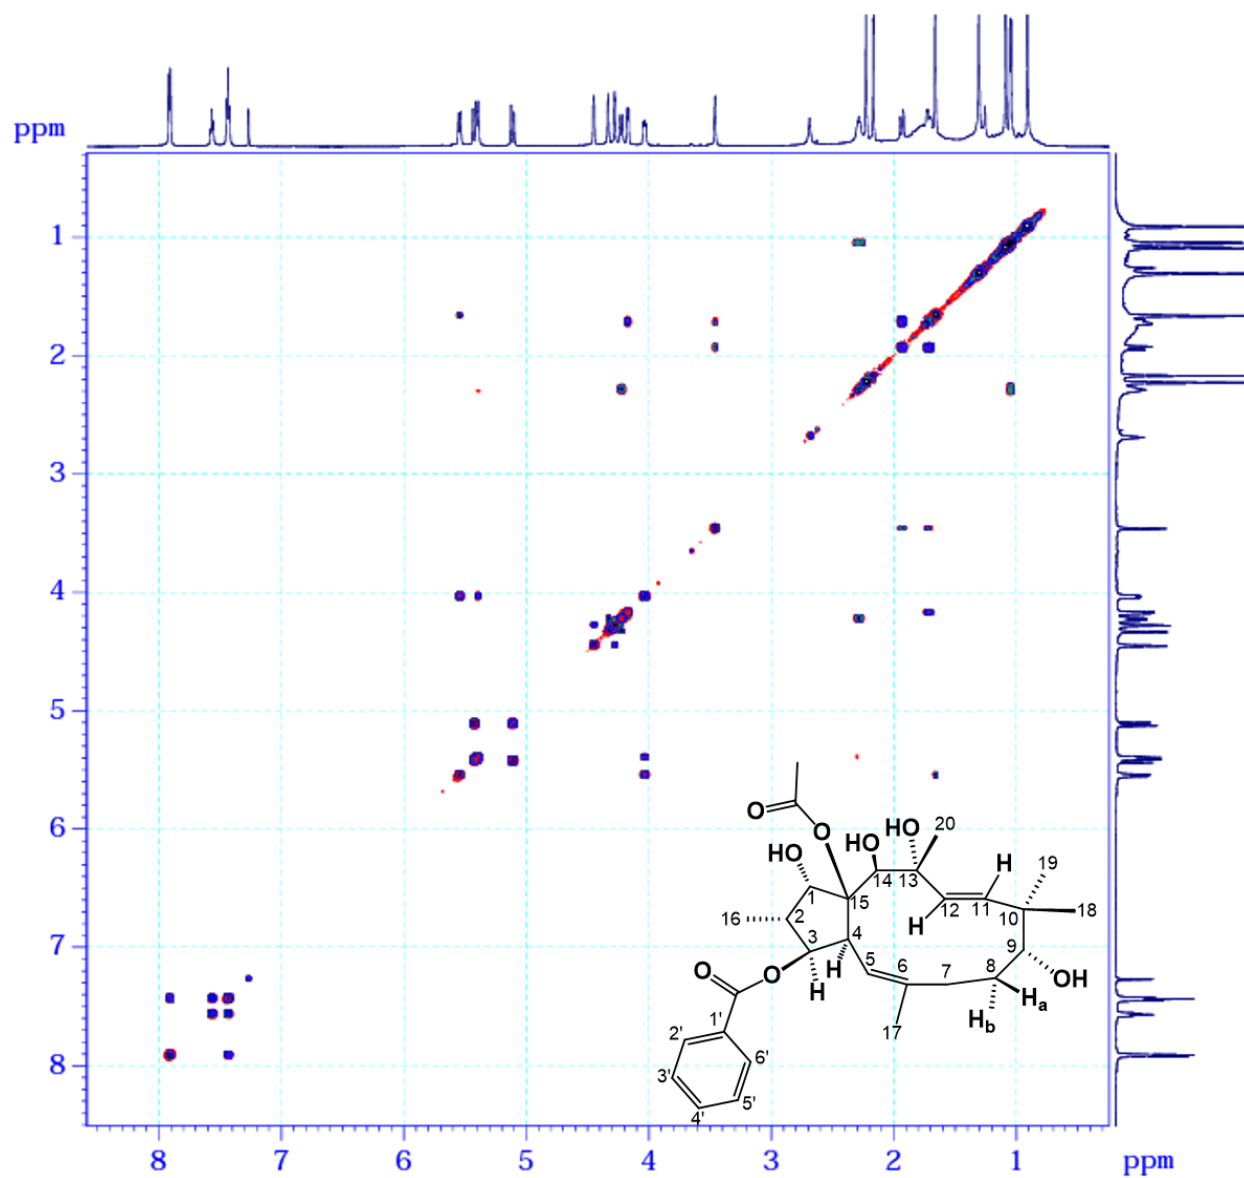

Figure S45. HSQC spectrum of compound P5 (CDCl<sub>3</sub>)

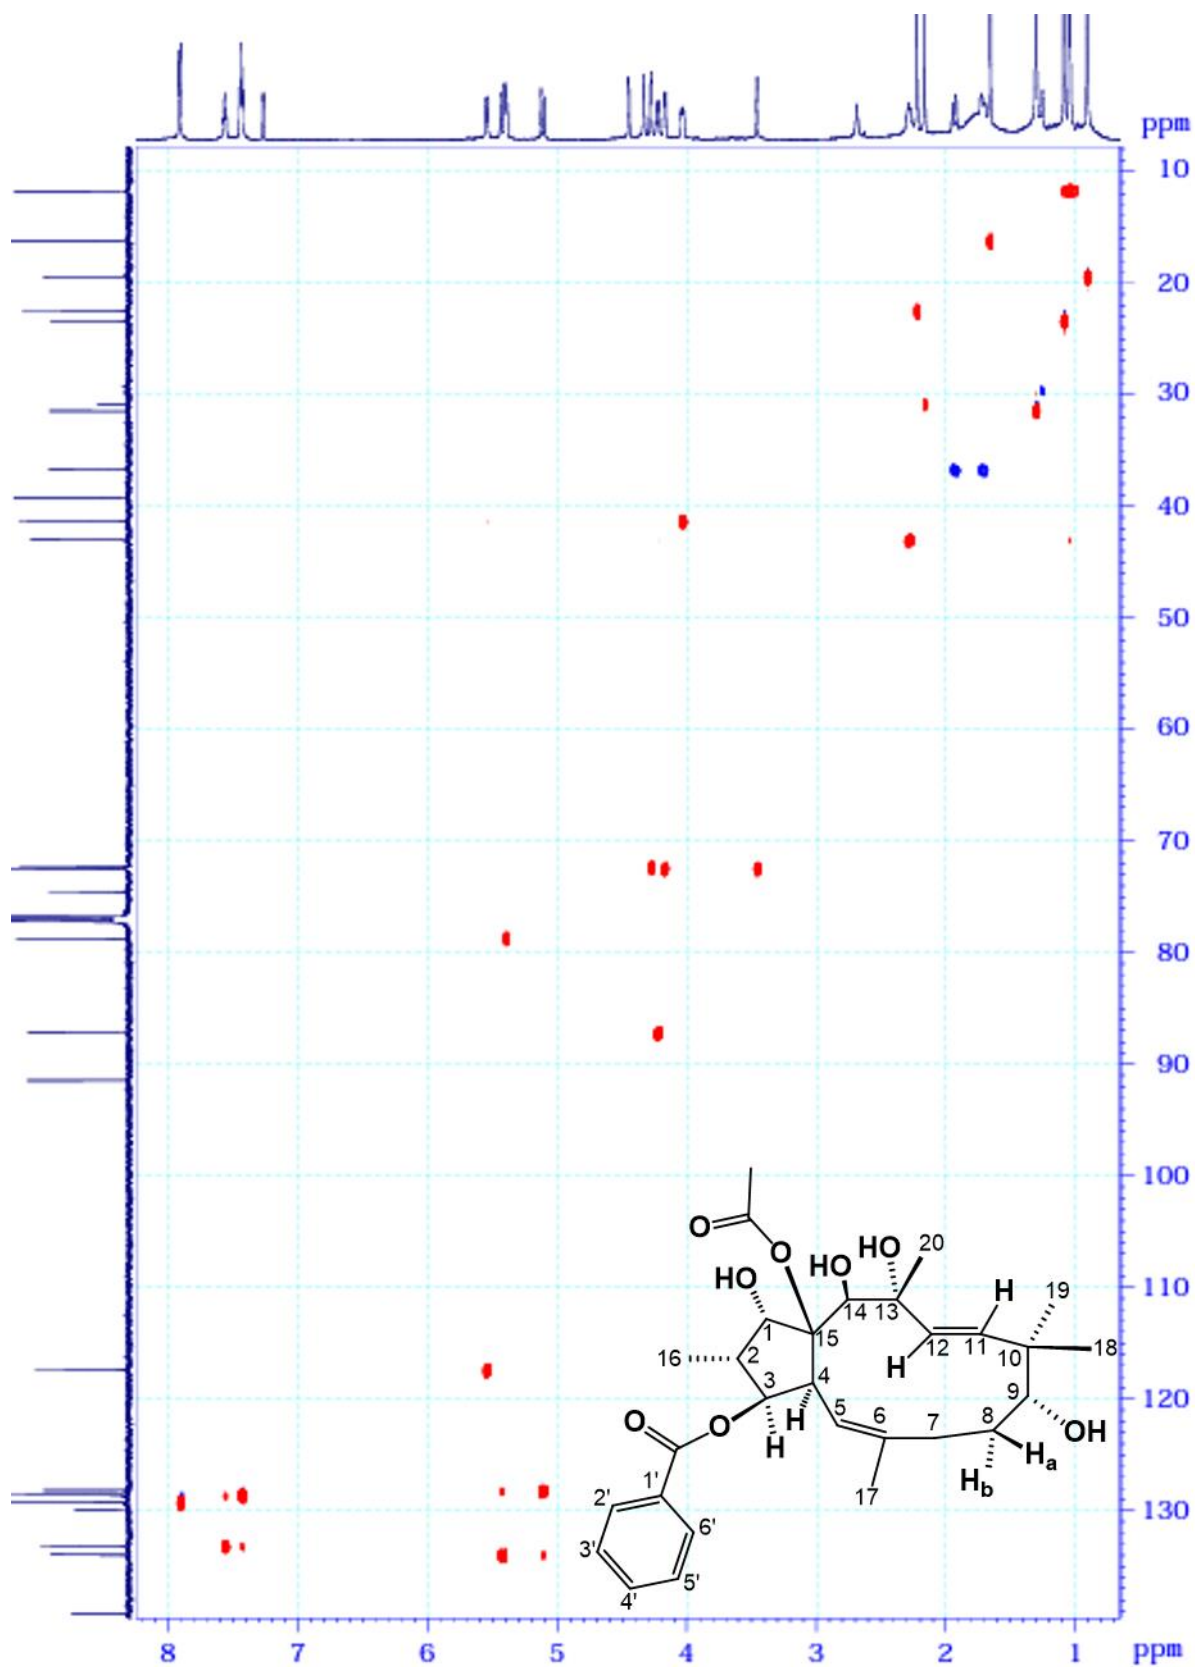

Figure S46. HMBC spectrum (total) of compound P5 (CDCl<sub>3</sub>)

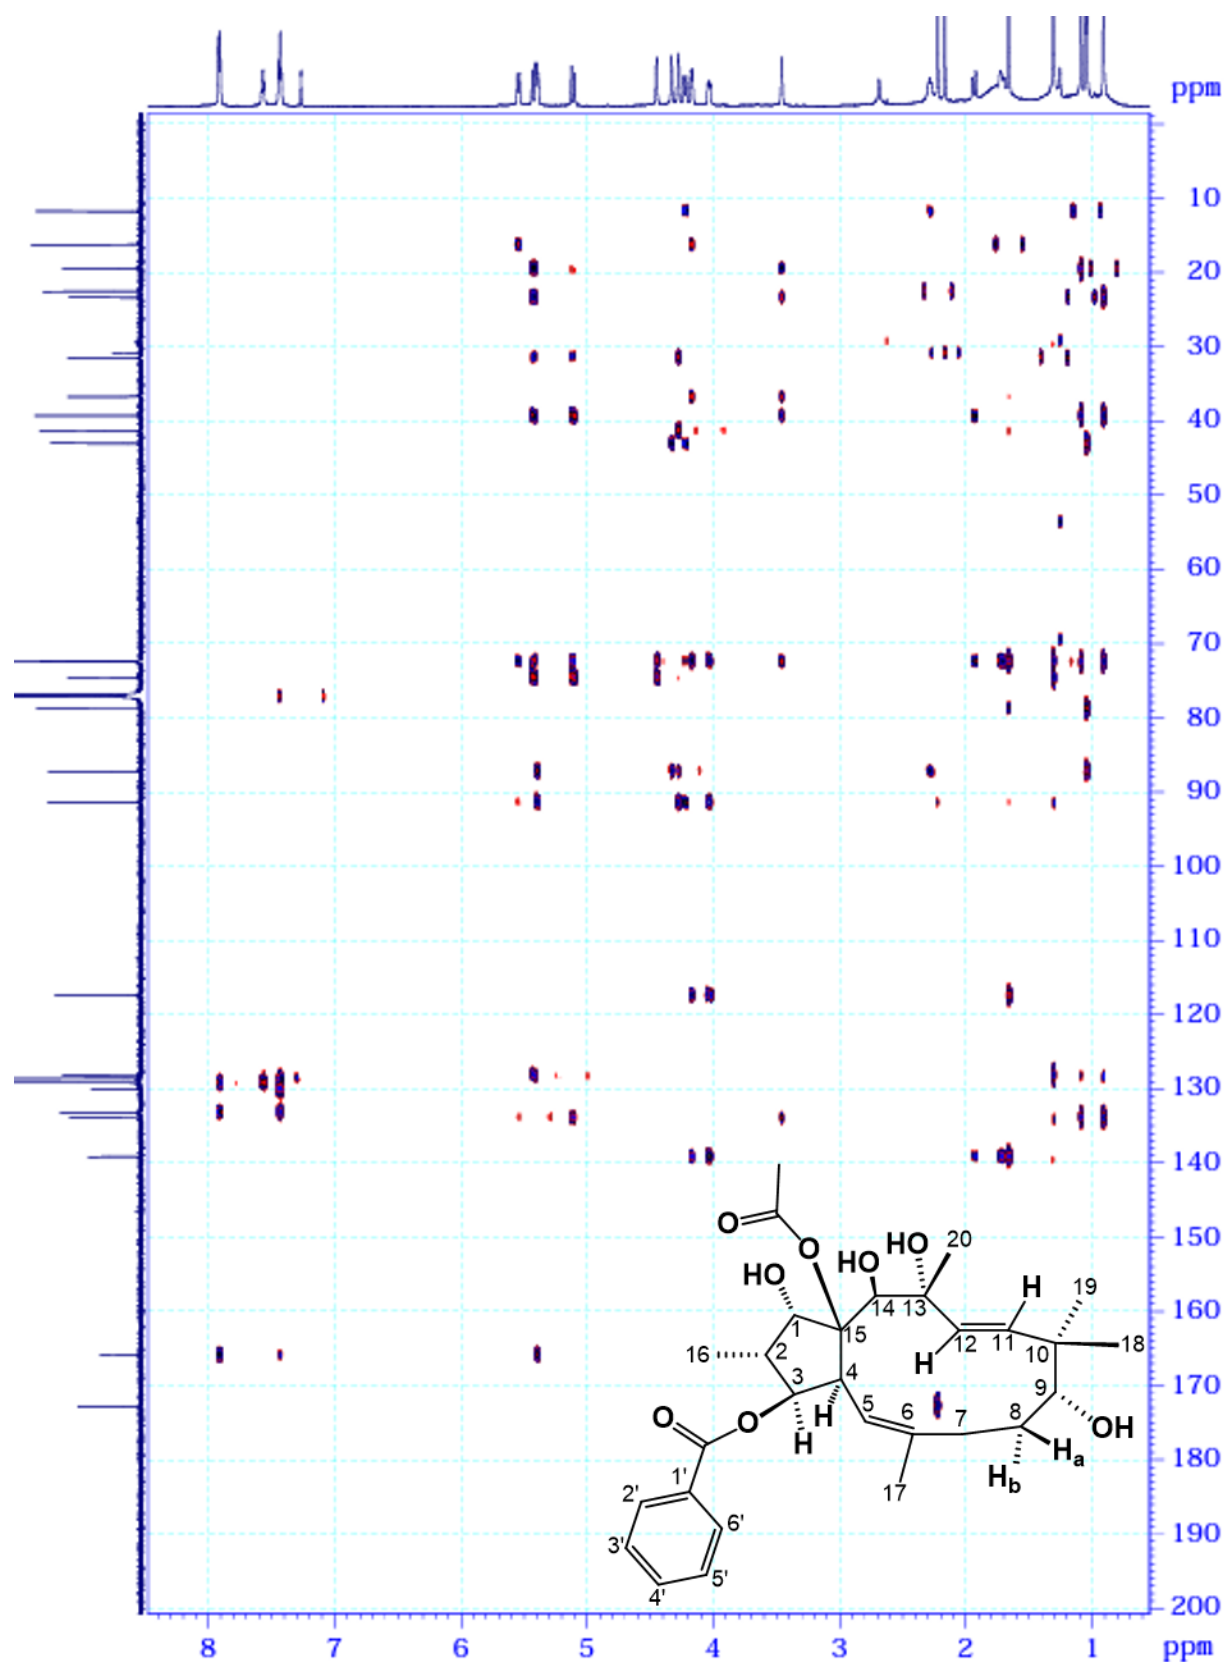

Figure S47. HMBC spectrum (sketched) of compound P5 (CDCl<sub>3</sub>)

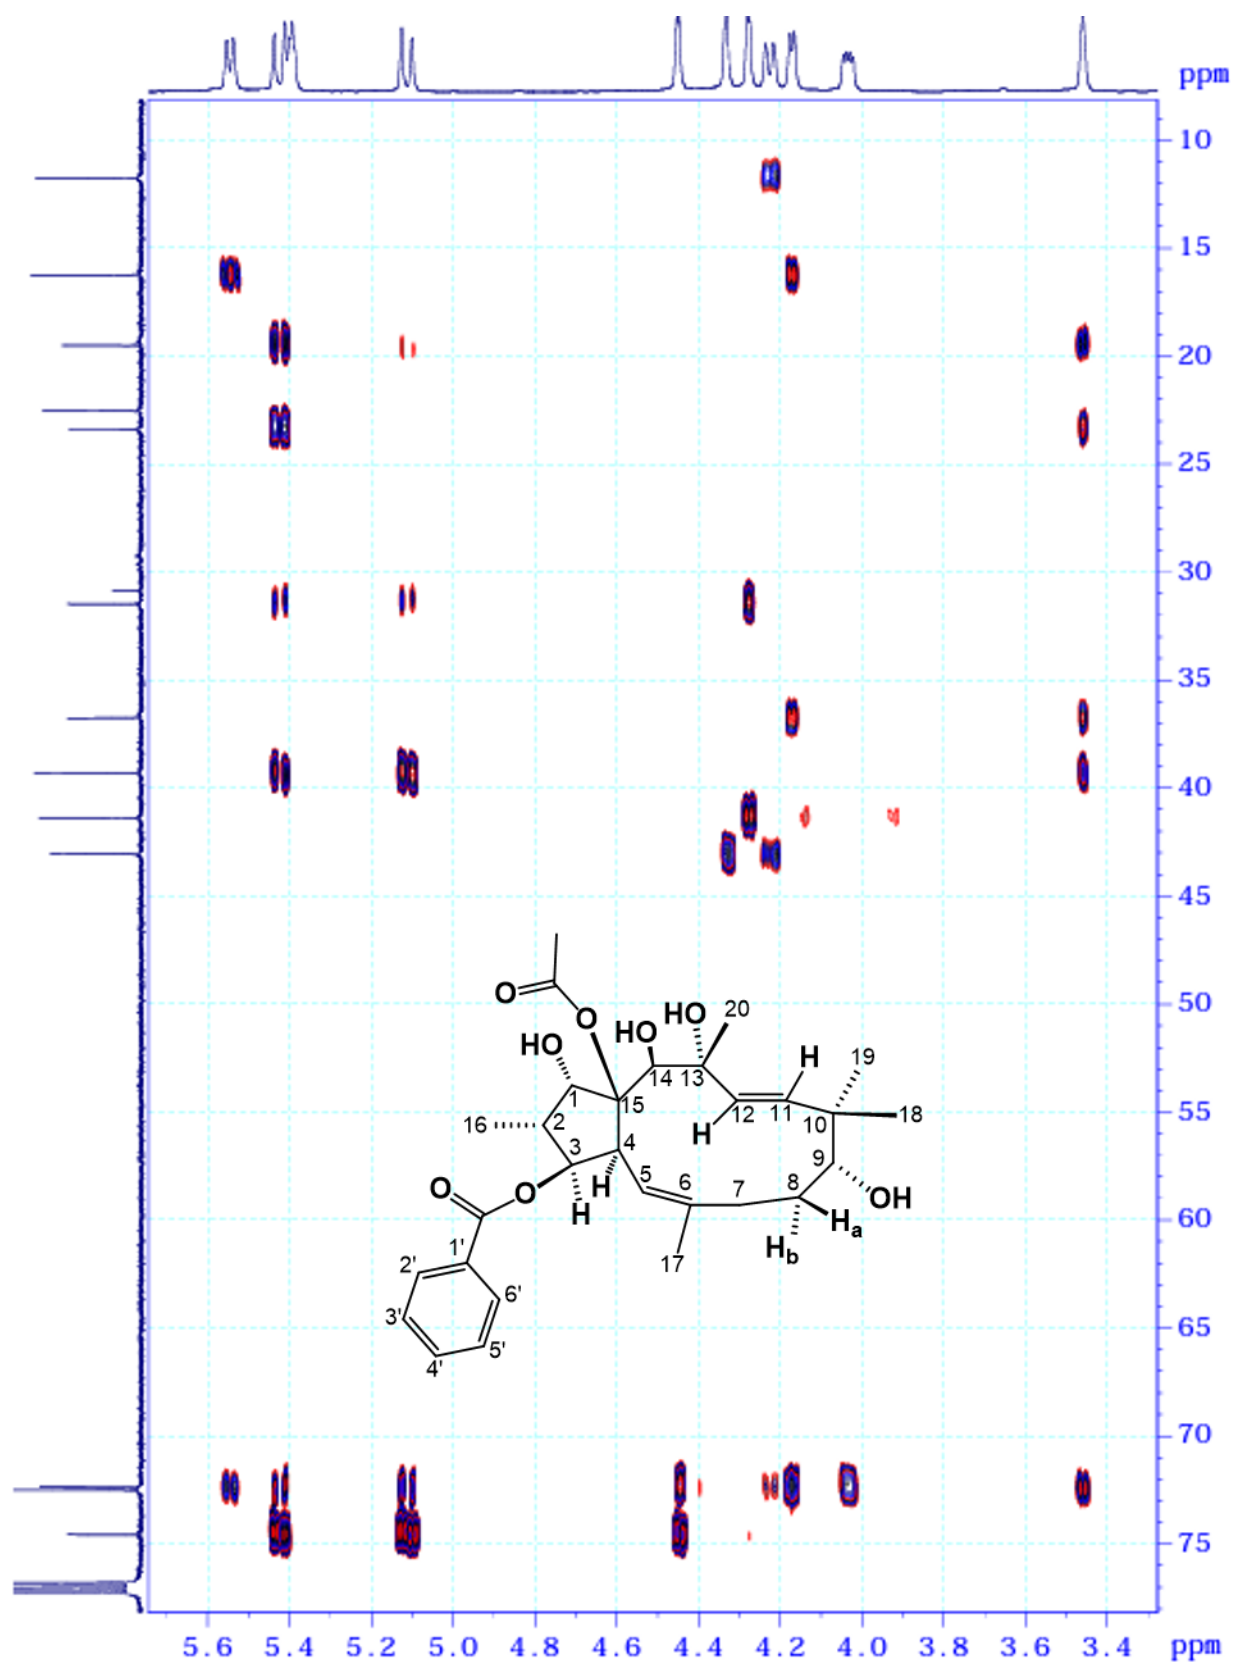



Figure S48. HMBC spectrum (sketched) of compound P5 (CDCl<sub>3</sub>)

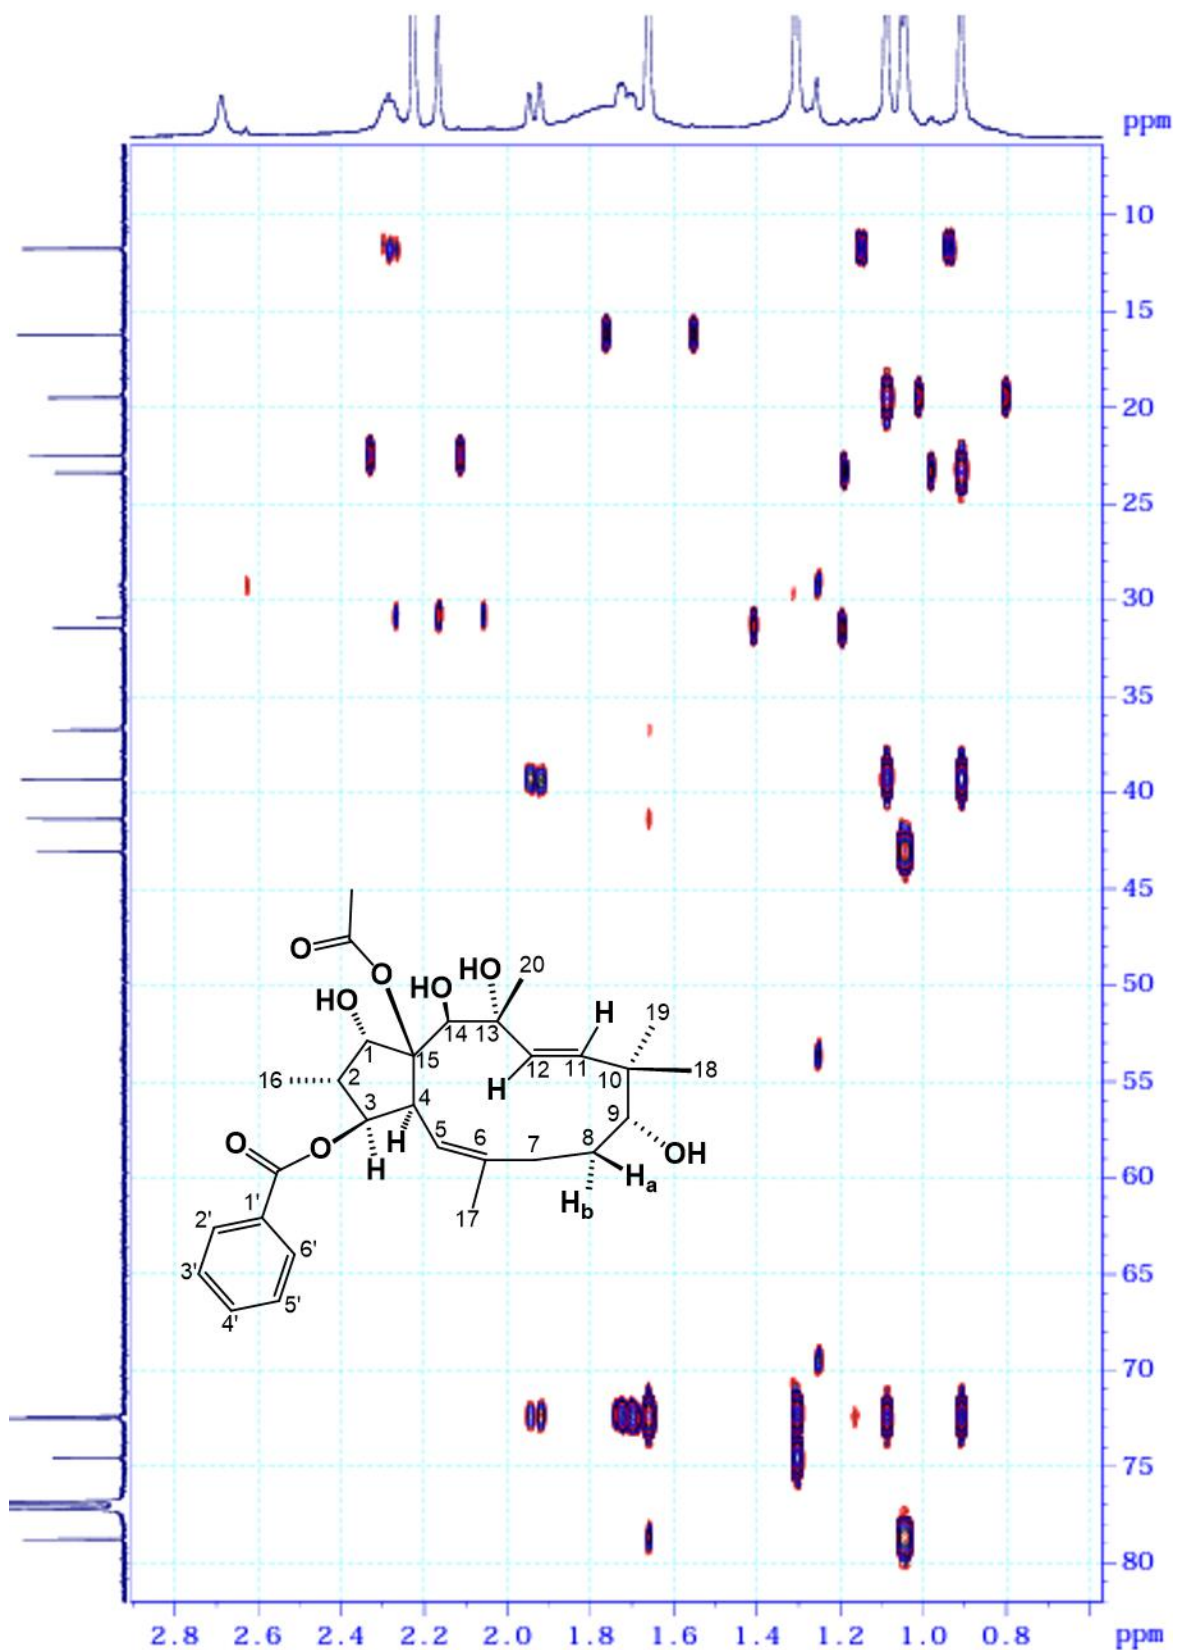

Figure S49. NOESY spectrum of compound P5 (CDCl<sub>3</sub>)

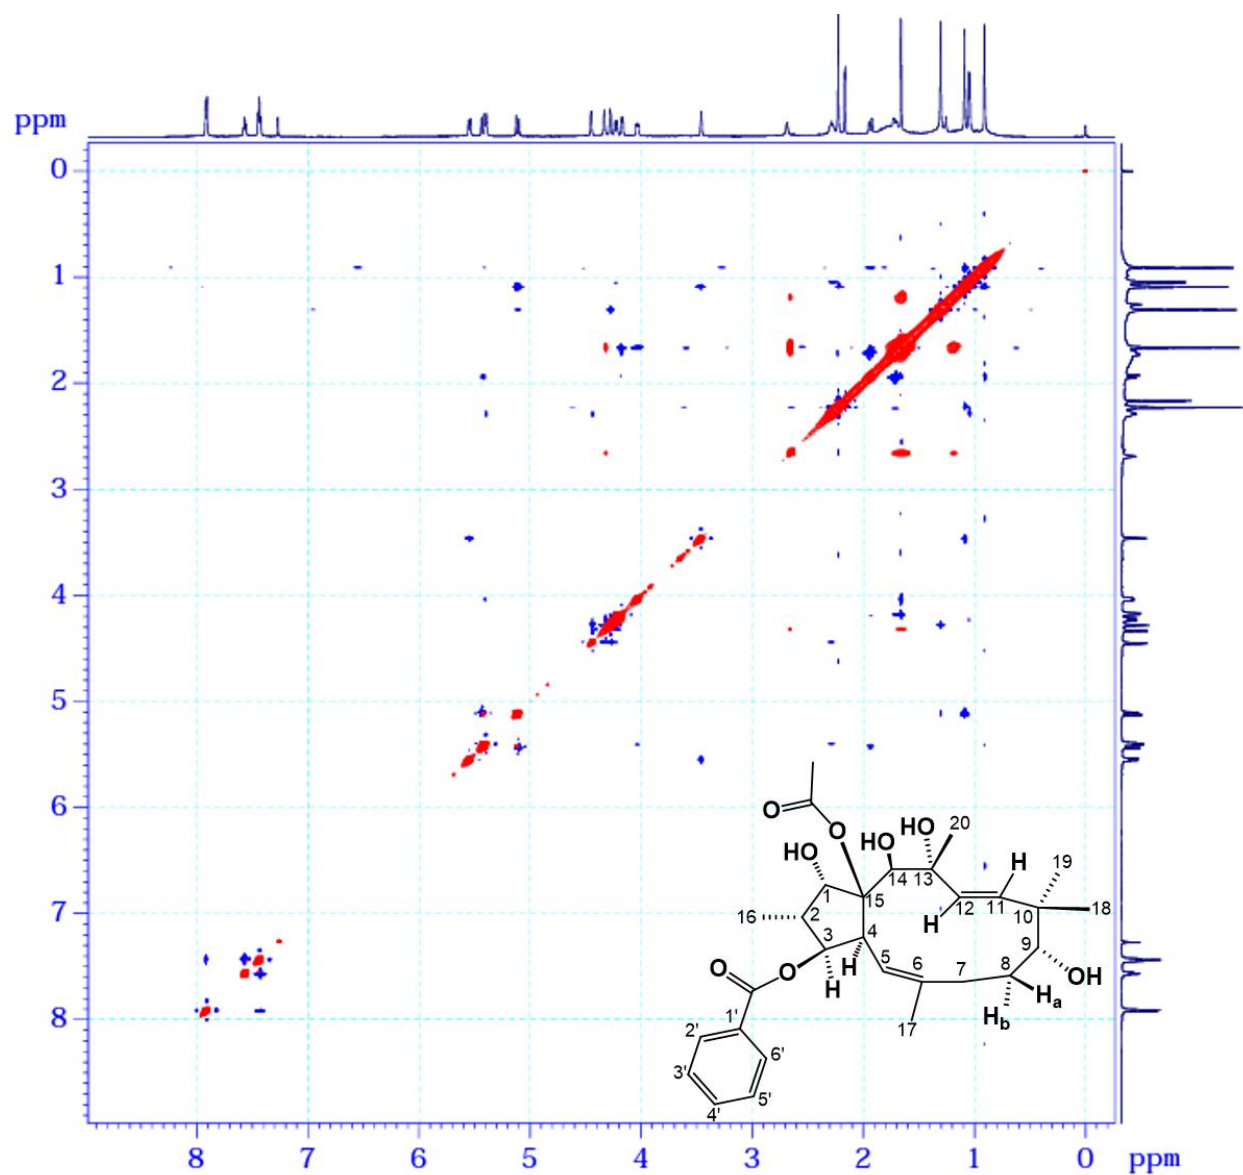

Figure S50. MS spectrum of compound P5 ( $\text{CDCl}_3$ )

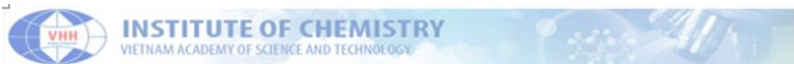

Sample name: P5117  
Operator: Hằng VHH  
Method: +IDA TOF MS/MS  
Date: 2022.10.13

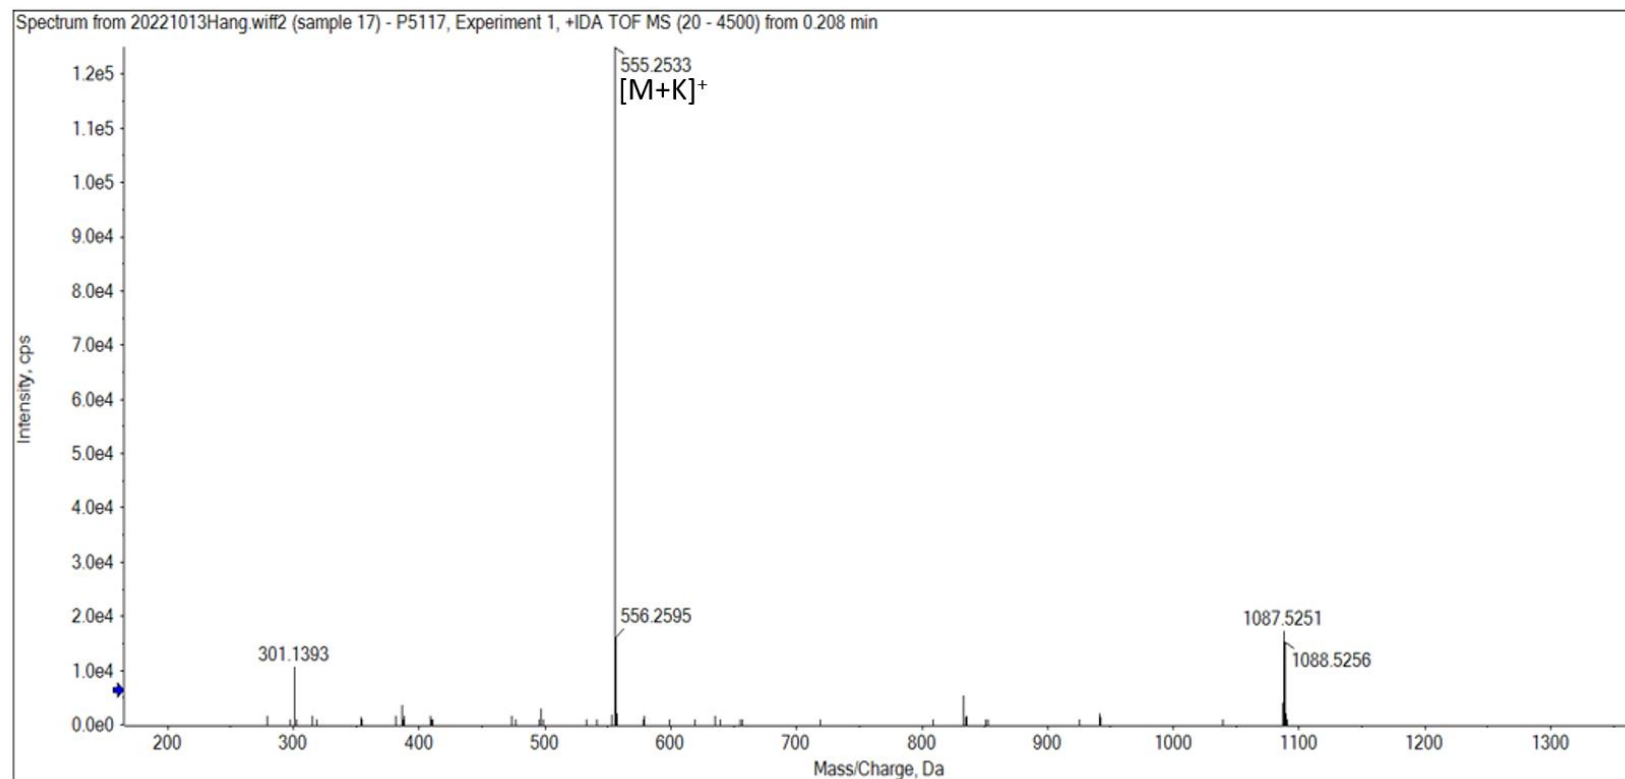

Figure S51. Structural novelty check for compound P5

Launch Meeting - Zoom x YouTube - YouTube x Facebook x Drawn Structure Substance Search x

scifinder-n.cas.org/search/substance/6373af65192c317d2fd1de4771

CAS Scifinder® Substances Enter a query...

### Substances search for drawn structure

References Reactions Suppliers Save and Alert

Structure Match: As Drawn (0), Substructure (0), **Similarity (160K)**

Chemscap Analysis: Visually explore structure similarity with a powerful new tool. Learn more about Chemscap. **Create Chemscap Analysis**

Filter Behavior: Filter by Exclude

Filtering: Similarity: 3 Selected x Number of Components: 1 x Clear All Filters

181 Results Sort: Relevance View: Partial

| 1                                                                                                                | 2                                                                                                                | 3                                                                                                                |
|------------------------------------------------------------------------------------------------------------------|------------------------------------------------------------------------------------------------------------------|------------------------------------------------------------------------------------------------------------------|
| <b>2287256-51-1</b>                                                                                              | <b>1946844-10-5</b>                                                                                              | <b>1016572-85-2</b>                                                                                              |
|                                                                                                                  |                                                                                                                  |                                                                                                                  |
| Absolute stereochemistry shown<br>E/Z labels describe double bond geometry                                       | Absolute stereochemistry shown, Rotation (i)<br>E/Z labels describe double bond geometry                         | Absolute stereochemistry shown, Rotation (i)<br>E/Z labels describe double bond geometry                         |
| $C_{29}H_{40}O_8$<br>3aH-Cyclopentacyclododecene-1,3a,4,9,<br>10,11-hexol, 1,2,3,4,5,8,9,10,11,13a-<br>decaly... | $C_{27}H_{38}O_8$<br>3aH-Cyclopentacyclododecene-1,3,3a,4,<br>5,9,11-heptol, 1,2,3,4,5,8,9,10,11,13a-<br>deca... | $C_{29}H_{40}O_7$<br>3aH-Cyclopentacyclododecene-1,3a,4,9,<br>11-pentol, 1,2,3,4,5,8,9,10,11,13a-<br>decahydr... |

November 15, 2022

**Substances**  
10:25 PM

As Drawn (0)  
Substructure (0)  
Similarity (160K)

**Rerun Search**

Edit Search
